# Supplementary material for: Colibactin leads to a bacteria-specific mutation pattern and self-inflicted DNA damage
Source: Genome Res. 2024 Aug;34(8):1154–64. doi: 10.1101/gr.279517.124 (PMC11444178; doi:10.1101/gr.279517.124)
Supplement: Supplement 4 [file Supplemental_Table_S1.xlsx]

## Sheet: 8h_1to1
strain	log2(fold-change)	adjusted p-value
aaeA	0.0652378	0.278375
aaeB	0.0113737	0.861824
aaeR	0.0444218	0.376621
aaeX	0.145538	0.0110451
aas	0.00954241	0.882947
aat	-0.0290357	0.744235
abgA	-0.083203	0.656358
abgB	-0.0113697	0.98642
abgR	0.00158799	0.99256
abgT	0.00140115	0.996471
abrB	-0.119988	0.217636
aceA	0.0413836	0.399241
aceB	0.084363	0.115019
aceE	NA	NA
aceF	0.133307	0.886199
aceK	0.0514447	0.545743
ackA	-0.0718794	0.961251
acnA	-0.124582	0.182235
acnB	0.0484515	0.562028
acpT	0.0780368	0.333215
acrA	-0.00894633	0.998587
acrB	-1.31753	0.0864427
acrD	-0.0242864	0.70005
acrE	0.0350146	0.658915
acrF	0.117536	0.0102827
acrR	-0.0225048	0.773144
acs	0.00363481	0.968748
actP	0.0750993	0.0264045
ada	-0.0308501	0.677051
add	-0.097058	0.543419
ade	0.0174519	0.736779
adhE	-0.015639	0.990596
adhP	0.0160571	0.922858
adiA	0.0388189	0.672787
adiC	-0.0669158	0.363507
adiY	0.0634348	0.428328
aegA	-0.00900738	0.922769
aer	0.00211481	0.984088
aes	0.0159742	0.852045
afuB	-0.275311	0.384845
afuC	-0.293245	0.31713
agaA	0.096248	0.591243
agaB	0.1105	0.100851
agaD	0.0436598	0.646559
agaI	0.0311799	0.757009
agaR	0.0386426	0.626473
agaS	0.0185403	0.841991
agaV	0.0315681	0.713105
agaW	-0.0151868	0.863705
agp	-0.00581747	0.953762
ahpF	-0.0743554	0.330697
aidB	-0.00472192	0.96099
ais	-0.00562691	0.94406
aldB	-0.0117389	0.882947
alkA	-0.0339107	0.772154
alkB	-0.0812563	0.168544
allA	-0.0817514	0.0138085
allB	0.127791	0.301788
allC	-0.0937453	0.404167
allD	-0.0652163	0.568043
allR	-0.0471713	0.207573
alpA	-0.0257896	0.869356
alr	-0.0387092	0.542509
alsA	-0.00487503	0.96099
alsB	-0.0577199	0.30588
alsC	-0.00495946	0.962894
alsE	-0.0586494	0.416185
alx	0.0346622	0.65455
amiA	0.0173735	0.853797
amiB	0.0252349	0.672787
amn	-0.00869393	0.987656
ampD	0.0962405	0.304689
ampE	0.0356751	0.763716
ampG	0.00411442	0.965281
ampH	0.00828214	0.938893
amtB	0.058491	0.340566
amyA	-0.100745	0.112902
ansA	-0.0304061	0.851353
ansB	0.0404005	0.48034
ansP	-0.0198493	0.914919
apaG	0.0311004	0.698115
apaH	-0.0331897	0.90862
aphA	0.0636389	0.363639
appA	0.0375899	0.825364
appB	-0.0314552	0.726776
appC	-0.0542973	0.552944
apt	0.0214215	0.860573
aqpZ	-0.0522469	0.389897
araA	NA	NA
araB	NA	NA
araC	0.0325781	0.697414
araE	0.00452722	0.96099
araF	0.0479538	0.782169
araG	-0.0433561	0.776966
araH	-0.00947593	0.9494
araJ	0.0792513	0.111613
arcA	-0.665268	0.821606
arcB	0.263552	0.285729
argA	-0.0259391	0.668326
argB	0.0481632	0.438965
argC	0.00915718	0.905451
argD	NA	NA
argE	-0.0298728	0.611977
argF	-0.288128	0.369878
argG	0.0313431	0.583016
argH	0.121008	0.00020836
argO	-0.120059	0.24379
argP	0.075831	0.245141
argT	-0.051925	0.672787
arnT	-0.0224327	0.767302
aroA	0.0389449	0.793918
aroB	0.0681566	0.399309
aroC	0.0323884	0.834689
aroD	-0.0980212	0.77231
aroE	NA	NA
aroF	0.0457837	0.428328
aroG	0.00474189	0.977404
aroH	-0.133395	0.612748
aroL	0.000120227	0.99876
aroM	0.0258585	0.821606
aroP	-0.0254496	0.853797
arpA	0.0721283	0.143271
arsB	-6.19221e-05	0.999015
arsC	0.117218	0.0412132
arsR	0.00507682	0.962592
artI	-0.0292066	0.818657
artJ	-0.021221	0.779297
artM	-0.0301592	0.70005
artP	-0.0574077	0.500867
artQ	0.0170326	0.879595
ascB	0.06508	0.62216
ascF	0.0705361	0.548342
ascG	-0.0130016	0.917872
aslA	0.0348893	0.61169
aslB	0.0995927	0.0535648
asmA	-0.16702	0.657684
asnA	0.101744	0.123757
asnB	-0.137517	0.00190798
asnC	0.0975795	0.0202094
aspA	0.0352921	0.865814
aspC	0.199253	0.725682
asr	-0.0922391	0.293593
astA	-0.0308545	0.685205
astB	-0.00858182	0.9494
astC	-0.0835141	0.345646
astD	-0.0340297	0.881577
astE	-0.0635804	0.805388
atoA	-0.0146053	0.867794
atoB	-0.0382094	0.446927
atoC	0.0204186	0.81955
atoD	0.0169291	0.887197
atoE	0.0136795	0.872587
atoS	0.0280105	0.73856
atpA	-0.161963	0.713368
atpB	-0.205981	0.710146
atpC	-0.208208	0.819474
atpE	-0.191468	0.713105
atpF	-0.221755	0.552944
atpG	-0.38017	0.621507
atpI	0.0478974	0.39969
avtA	0.00469664	0.968748
azoR	-0.0405492	0.832799
bacA	-0.0481999	0.359146
baeR	0.0546403	0.590305
baeS	0.0329345	0.827307
barA	-0.156215	0.00978161
basR	-0.0113481	0.914919
basS	0.0189965	0.882947
bax	0.102708	0.0147823
bcp	0.00441367	0.965281
bcr	0.0748938	0.232031
bcsA	-0.0417704	0.418814
bcsB	-0.0270428	0.707397
bcsC	0.00462581	0.96099
bcsE	0.0658936	0.397737
bcsF	0.0153116	0.869535
bcsG	0.0523506	0.340566
bcsZ	-0.0266533	0.716909
bdm	0.0020043	0.99256
betA	-0.0469334	0.588414
betB	0.0260513	0.882435
betI	0.0536696	0.363261
betT	-0.0522072	0.412094
bglA	-0.0150241	0.908701
bglB	0.0616092	0.285937
bglF	0.0462813	0.486645
bglG	0.0211114	0.838581
bglH	0.000344105	0.998587
bglX	-0.0922991	0.248623
bioA	-0.0683208	0.75908
bioB	0.180376	0.459251
bioC	-0.109565	0.40197
bioD	0.0652665	0.718194
bioF	0.0593535	0.728392
bioH	0.119296	0.362037
bipA	-0.032422	0.924633
blr	0.00898181	0.972599
bolA	0.0108485	0.890712
brnQ	-0.0111696	0.908701
btuB	0.080061	0.0674539
btuC	-0.0478055	0.827307
btuD	-0.164515	0.378645
btuE	0.0220039	0.913368
btuF	-0.0260103	0.828511
btuR	-0.0111411	0.945223
cadA	-0.0178001	0.834689
cadB	0.0377777	0.784847
cadC	0.060615	0.548342
caiA	0.0330584	0.471436
caiB	0.0160215	0.867794
caiC	0.0715239	0.0328938
caiD	-0.0131539	0.855493
caiE	-1.64703	0.767302
caiF	-0.00722664	0.93577
caiT	0.0318863	0.70005
carA	-0.687203	0.769442
carB	-2.05535	0.545743
cbl	0.0167968	0.94406
cbpA	-0.0255055	0.818374
cbpM	-0.0120649	0.906781
cbrA	-0.0411872	0.362037
cbrC	0.0130348	0.905577
cchA	0.0768822	0.270186
cchB	-0.0802164	0.024057
ccmA	0.0159169	0.903776
ccmB	-0.0362445	0.552944
ccmC	-0.0160841	0.884606
ccmD	-0.0425267	0.645721
ccmE	-0.0504182	0.539863
ccmF	0.0174866	0.886205
ccmG	0.0338141	0.825364
ccmH	-0.0773194	0.140398
cdaR	-0.0462587	0.399241
cdh	-0.0147282	0.860794
cedA	-0.0915377	0.347289
cfa	-0.0881874	0.616955
chaA	-0.120745	0.291053
chaB	-0.0316319	0.79468
chbA	-0.0999082	0.43716
chbC	-0.0275225	0.886205
chbF	-0.0436159	0.761525
chbG	-0.0484882	0.67988
chbR	-0.0794951	0.650528
cheA	-0.0450568	0.707397
cheB	0.0186342	0.872587
cheR	-0.096949	0.199429
cheW	0.0145164	0.926375
cheY	-0.112501	0.0486659
cheZ	0.00976384	0.94971
chiA	0.0686556	0.362037
chpB	0.0324959	0.73856
chpR	0.0172109	0.879575
chpS	-0.123486	0.838609
cirA	-0.00749004	0.933607
citA	-0.0685304	0.507221
citB	0.00189008	0.990596
citC	0.114009	0.656453
citD	0.0374998	0.875852
citE	0.2195	0.24852
citF	-0.0591787	0.149138
citG	-0.0561319	0.252872
citT	0.0343734	0.710146
citX	0.00804008	0.9494
clcA	-0.00398457	0.985592
clcB	-0.0696309	0.793045
cld	-0.0569204	0.376621
clpA	-0.0718889	0.684371
clpB	-0.0339593	0.695228
clpP	0.27687	0.143449
clpS	0.0491953	0.514694
clpX	0.091612	0.818374
cls	-0.067413	0.748013
cmk	0.42639	0.9494
cmr	-0.0259205	0.732684
cmtA	0.0781312	0.352755
cmtB	-0.0793403	0.514487
coaE	NA	NA
cobB	-0.0416415	0.807479
cobC	0.0367388	0.818374
cobS	-0.115045	0.0314048
cobT	-0.072403	0.556629
cobU	-0.0439086	0.759281
codA	-0.0160031	0.867794
codB	0.0602456	0.363261
cof	0.0626273	0.0942987
copA	-0.0789399	0.0459643
corA	-0.0492123	0.595008
cpdA	0.00572475	0.945223
cpdB	0.0327408	0.502747
cpsB	-0.0957329	0.273093
cpxA	-0.278898	0.479731
cpxP	0.0138936	0.906781
cpxR	0.0798011	0.193153
crcA	-0.00810029	0.94971
crcB	0.0114541	0.908701
creA	-0.0231343	0.713105
creB	-0.00883414	0.926375
creC	-0.0124705	0.889282
creD	0.0384298	0.603047
crl	-0.118523	0.013112
crp	NA	NA
crr	0.00404069	0.993347
csdA	0.0416397	0.399374
csgA	0.0152295	0.950475
csgB	0.0692692	0.393153
csgD	0.0399283	0.805551
csgE	-0.113454	0.170817
csgF	-0.0805189	0.738102
csiE	-0.000557082	0.998587
csiR	0.0281225	0.765382
cspA	0.00690947	0.945223
cspB	-0.0178156	0.9494
cspC	-0.123529	0.108782
cspD	-0.0376197	0.418814
cspE	-0.056012	0.339994
cspF	0.0528811	0.853191
cspG	0.0252409	0.914652
cspH	-0.0374754	0.761525
cspI	-0.0310435	0.922769
cstA	-0.0016757	0.990596
cueO	-0.00170624	0.988906
cueR	-0.0275002	0.659113
cusA	-0.00978043	0.886199
cusB	-0.0709143	0.0880893
cusC	0.180995	0.000101852
cusR	0.11111	0.0880893
cusS	-0.0343728	0.569766
cutA	-0.0499987	0.650528
cutC	-0.0851998	0.650528
cvpA	0.0311024	0.911309
cvrA	-0.10463	0.0683209
cyaA	-0.0457087	0.807454
cyaY	0.0243501	0.772154
cybB	-0.017015	0.9494
cybC	0.0156433	0.835807
cycA	0.016572	0.853797
cynR	0.0772096	0.218176
cynS	-0.0485079	0.428328
cynT	-0.0290576	0.713368
cynX	-0.00959179	0.931827
cyoA	0.0670382	0.0147823
cyoB	0.0661233	0.118761
cyoC	0.0357103	0.351873
cyoD	0.0406324	0.359146
cyoE	0.0425281	0.221688
cysA	0.0717261	0.448507
cysB	-0.106108	0.925953
cysC	-0.00338156	0.996471
cysD	-0.025141	0.910851
cysE	NA	NA
cysG	0.15815	0.697414
cysH	-0.050308	0.925318
cysI	0.255563	0.387973
cysJ	-0.0282074	0.94819
cysK	0.0711913	0.860794
cysN	0.10558	0.680385
cysP	0.0108767	0.936687
cysQ	-0.00962606	0.987656
cysU	-0.0228937	0.869535
cysW	0.017202	0.930179
cysZ	0.0076282	0.945018
cytR	0.111608	0.0152327
dacA	0.0569749	0.814322
dacB	0.0478146	0.41399
dacD	0.00255848	0.988495
dadA	-0.108852	0.127611
dadX	-0.0575489	0.681633
dam	0.104947	0.695228
damX	0.114235	0.170817
dapF	NA	NA
dbpA	0.0161977	0.887197
dcd	-0.189762	0.0828551
dcm	0.00257353	0.988906
dcp	-0.107908	0.533684
dcrB	-0.00431732	0.967672
dctA	0.0272348	0.761525
dcuA	0.0630443	0.307384
dcuB	0.0183258	0.815123
dcuD	0.0447846	0.362037
dcuR	-0.00267769	0.984088
dcuS	0.156867	0.295152
ddg	-0.0446447	0.620818
ddlA	0.0780849	0.0591868
ddlB	0.038001	0.707397
ddpA	-0.1032	0.374885
ddpB	-0.0845027	0.575545
ddpC	0.0010178	0.998501
ddpD	0.0370727	0.835978
ddpF	-0.147402	0.281809
ddpX	0.0725379	0.836868
deaD	-0.0143545	0.931827
dedA	-0.0546744	0.650528
dedD	0.0440321	0.748495
def	0.0729939	0.0579816
degP	0.127267	0.376621
degQ	-0.0031333	0.968748
degS	NA	NA
deoA	0.000178318	0.998587
deoB	0.0523108	0.19022
deoC	-0.0137161	0.851385
deoD	0.0101056	0.846671
deoR	-0.125121	0.340566
dgkA	0.0983534	0.602986
dgoA	0.103146	0.182228
dgoD	0.0760546	0.308169
dgoK	0.0249471	0.863726
dgoR	0.0484578	0.416185
dgoT	-0.0099132	0.882947
dgsA	-0.0624967	0.735168
dgt	-0.0327627	0.705258
dhaH	-0.0891548	0.431095
dhaK	-0.0281922	0.757999
dhaL	-0.0455542	0.67944
dhaR	-0.124511	0.185486
dicB	-0.111931	0.454142
dicC	-0.00371508	0.994307
dinB	-0.0209745	0.871733
dinD	-0.0264818	0.653216
dinF	0.0287514	0.677908
dinG	-0.00781014	0.94971
dinI	0.0980988	0.767288
dinJ	-0.0133975	0.933124
dipZ	0.0813984	0.61169
djlA	0.0144778	0.792627
djlB	-0.0784481	0.36879
djlC	0.0254131	0.818374
dkgA	0.0313752	0.766211
dkgB	-0.0165746	0.917805
dksA	0.504571	0.827307
dld	0.061369	0.270069
dmsA	-0.0391329	0.531819
dmsB	-0.00264141	0.980685
dmsC	-0.0132504	0.900825
dmsD	-0.0706065	0.446391
dnaB	0.32713	0.0156309
dnaJ	0.0422132	0.853797
dnaK	NA	NA
dnaQ	-0.134501	0.98642
dos	-0.0477014	0.908701
dppA	0.102972	0.0712035
dppB	0.0151233	0.886199
dppC	0.0188647	0.771637
dppD	0.0349543	0.716909
dppF	0.0409706	0.543626
dps	-0.0310873	0.853797
dsbB	-0.422744	0.191805
dsbC	0.0594664	0.202597
dsbG	0.0181605	0.852045
dsdA	-0.026044	0.853797
dsdC	0.0327999	0.821842
dsdX	-0.0266386	0.787759
dsrB	-0.0231716	0.825364
dtd	0.00186248	0.98642
dusB	0.0998665	0.056504
dusC	0.243899	0.345646
eaeH	-0.0566207	0.658915
eamA	0.0183152	0.933607
ebgA	-0.0153455	0.878724
ebgC	-0.0553832	0.40197
ebgR	-0.0893785	0.467254
eco	-0.0576194	0.41991
ecpD	0.127089	0.2314
eda	0.164582	0.229041
edd	-0.104181	0.210166
ego	-0.129959	0.414654
elaA	-0.0442989	0.536126
elaB	-0.0496452	0.633448
elaC	0.0203524	0.847093
elaD	-0.00844679	0.919251
elbA	-0.0781992	0.372629
elbB	NA	NA
emrA	0.034217	0.494667
emrB	0.0823276	0.108782
emrD	0.0477032	0.232189
emrE	-0.0339606	0.827307
emrK	0.0230884	0.947852
emrY	-0.0358025	0.805551
emtA	-0.039421	0.548342
endA	0.0732232	0.271717
entA	0.020671	0.877436
entB	-0.0247097	0.79468
entC	-0.0450572	0.4565
entD	0.0159856	0.884606
entE	-0.00676658	0.936687
entF	-0.101124	0.388147
envC	-0.216405	0.519125
envR	0.0472698	0.552944
envY	0.0181591	0.863726
envZ	0.141895	0.787759
epd	0.117386	0.0508819
eptA	-0.108926	0.0968597
eptB	0.0478307	0.429387
erfK	-0.0709779	0.548342
essD	0.0391812	0.772205
etp	0.0424203	0.808798
eutA	-0.0238959	0.61169
eutB	-0.0400354	0.539926
eutC	0.018248	0.787759
eutE	0.0934493	0.0730684
eutG	-0.0409796	0.345646
eutH	0.0961444	0.0459907
eutI	-0.0476364	0.196491
eutJ	-0.0150142	0.827307
eutL	-0.0167443	0.825364
eutP	-0.00104982	0.994319
eutQ	-0.029381	0.543908
eutT	-0.0205254	0.761525
evgA	-0.0484445	0.805618
evgS	0.065964	0.502747
exbB	0.00963028	0.928517
exbD	0.049244	0.606543
exo	0.03327	0.460433
exoX	0.0334859	0.821842
exuR	-0.0101939	0.914652
exuT	0.0069937	0.945223
fabF	0.0330676	0.700484
fabH	0.112871	0.985165
fabR	0.281557	0.121016
fadA	0.111608	0.00189521
fadB	0.0532498	0.40596
fadD	-0.00658068	0.948201
fadE	-0.0732868	0.0482006
fadH	0.115447	0.128536
fadL	0.0125824	0.908701
fadR	-0.0835936	0.229763
fbaB	0.0245633	0.884606
fbp	0.00122004	0.995547
fcl	-0.0774524	0.130442
fdhD	-0.089072	0.270069
fdhE	0.00640052	0.945223
fdhF	-0.00558252	0.96099
fdnG	-0.0507529	0.667502
fdnH	0.00793378	0.950048
fdnI	-0.021717	0.858144
fdoG	0.0140548	0.838609
fdoI	0.114253	0.117634
fdrA	-0.0996368	0.167093
fdx	-0.128482	0.685155
feaB	-0.00533879	0.95518
feaR	0.0448925	0.76395
fecA	-0.036454	0.416185
fecB	0.0545388	0.237636
fecC	0.0190594	0.858297
fecD	0.0743335	0.315687
fecE	0.0510611	0.413741
fecI	0.031053	0.677908
fecR	0.0106792	0.90614
feoA	0.0457447	0.713105
feoB	0.0549094	0.708386
fepA	0.030951	0.728416
fepB	NA	NA
fepD	NA	NA
fepE	-0.0335432	0.805621
fepG	0.192511	0.31494
fhiA	-0.0561973	0.428153
fhlA	0.0232342	0.827307
fhuA	-0.0694472	0.61169
fhuB	0.0298838	0.735168
fhuC	0.000748191	0.996471
fhuD	-0.0222942	0.827307
fhuE	-0.00474831	0.965281
fhuF	0.103097	0.0876718
fic	-0.030664	0.545743
fieF	0.0723361	0.345646
fimA	-0.0282902	0.761525
fimB	0.0780319	0.237314
fimC	-0.0178823	0.869535
fimE	0.0536488	0.620818
fimF	0.00763377	0.9494
fimG	0.0699962	0.285729
fimH	0.089004	0.0864427
fimI	0.0199317	0.876374
fimZ	-0.0338296	0.8726
fis	-0.0342973	0.838581
fiu	0.100537	0.0930428
fixA	-0.0270091	0.615285
fixB	0.0016617	0.984542
fixC	0.0607328	0.260028
fixX	0.0513588	0.408401
fklB	0.0493649	0.590305
fkpA	0.0886752	0.0379186
fkpB	0.078906	0.0379186
fldB	-0.018897	0.807679
flgB	-0.123835	0.113461
flgC	-0.0277056	0.751267
flgD	-0.0562656	0.417446
flgE	-0.0352248	0.804187
flgF	-0.00213904	0.988495
flgG	-0.06875	0.333215
flgH	-0.0378901	0.767302
flgI	0.00916827	0.9494
flgJ	0.0054901	0.98642
flgK	-0.0505194	0.585775
flgL	-0.058899	0.656663
flgN	-0.0273931	0.713105
flhA	-0.048053	0.672787
flhB	-0.0973755	0.399206
flhE	-0.0897853	0.526417
fliA	-0.00899811	0.984088
fliC	-0.0757428	0.435749
fliD	-0.0378322	0.903776
fliE	-0.0257533	0.922919
fliF	-0.0422921	0.835761
fliG	-0.138608	0.110522
fliH	-0.032096	0.792627
fliI	-0.0220298	0.931827
fliJ	-0.1473	0.688286
fliK	0.0441295	0.820619
fliL	-0.0114786	0.968748
fliM	-0.0154726	0.933124
fliN	-0.0479411	0.757999
fliO	-0.0951869	0.611873
fliP	-0.0446152	0.772154
fliQ	-0.0419716	0.724725
fliR	0.0140883	0.9494
fliS	-0.0179785	0.94971
fliT	0.00737845	0.967625
fliY	-0.0671322	0.401211
fliZ	-0.0155233	0.900825
flk	-0.027686	0.840322
flu	-0.0367026	0.757009
flxA	-0.0317599	0.748495
fnr	-0.226927	0.265072
focA	0.247735	9.64713e-05
focB	0.0780571	0.545743
folA	NA	NA
folB	NA	NA
folC	NA	NA
folE	NA	NA
folK	NA	NA
folM	0.111837	0.469216
folX	-0.0227153	0.908701
fpr	0.0826708	0.0804348
frc	0.0618252	0.714567
frdA	-0.0163467	0.903919
fre	0.0862396	0.108782
frlA	-0.0332316	0.815868
frlB	0.0762619	0.119158
frlC	0.0159926	0.838217
frlD	0.0133397	0.895287
frlR	-0.00577886	0.96099
frmA	-0.0188573	0.818374
frmB	0.130981	0.077189
frmR	-0.0344671	0.607503
frsA	-0.0446013	0.52061
fruA	-0.0140645	0.871733
fruB	0.0475788	0.70005
fruK	-0.122406	0.15314
fruR	0.121067	0.667962
frvA	0.0153084	0.853191
frvB	0.0140108	0.882947
frvX	0.0322601	0.552944
frwB	-0.0198332	0.70005
frwC	0.0368908	0.408401
frwD	0.0578906	0.189363
fsaA	0.0241633	0.787759
fsaB	0.0203884	0.728416
fsr	0.0176072	0.797193
ftn	-0.0710506	0.853797
ftsB	1.13223	0.683472
ftsE	0.0682436	0.852045
ftsN	-0.0614105	0.83165
ftsX	0.0768006	0.799987
fucA	0.0193253	0.713368
fucI	0.0135223	0.838581
fucK	0.0530355	0.263283
fucO	0.0199822	0.740801
fucP	-0.0521335	0.342995
fucR	0.00113788	0.991287
fucU	-0.0147474	0.835807
fumA	-0.0846082	0.552944
fumB	-0.0227791	0.800291
fumC	-0.111792	0.196967
fur	0.0169108	0.984013
fxsA	0.120569	0.0652948
gabD	0.0368429	0.713368
gabP	0.094304	0.369878
gabT	0.000144368	0.998587
gadC	-0.013948	0.933124
gadE	-0.0445582	0.322847
gadW	0.0205722	0.787638
gadX	0.0776243	0.150865
galE	0.0330747	0.806631
galF	0.00506539	0.964133
galK	-0.0761098	0.470975
galM	-0.0331156	0.816257
galR	-0.00942301	0.882508
galS	-0.0588577	0.61169
galT	0.0250068	0.79468
galU	-3.03307	0.359146
gapA	-0.00701766	0.965308
garD	0.00354484	0.979947
garK	0.0747015	0.212213
garL	-0.038922	0.545743
garP	0.0142235	0.852045
garR	0.0561894	0.602881
gatC	-0.0344875	0.431095
gatD	0.0324858	0.68451
gatY	0.0555658	0.454142
gatZ	-0.0943204	0.151599
gcd	-0.0441908	0.610745
gcl	-0.0816563	0.077189
gcvA	-0.0787243	0.656453
gcvH	0.0257818	0.9494
gcvP	0.0665929	0.792627
gcvR	0.0884822	0.591243
gcvT	0.127672	0.313622
gdhA	-0.0934286	0.38737
ggt	0.0767199	0.372322
gidA	0.0763972	0.9494
gidB	-0.0322	0.856277
glcB	0.0231366	0.73856
glcC	0.0276226	0.838832
glcD	-0.00849938	0.91934
glcE	-0.00252912	0.98642
glcF	0.0609763	0.376621
glcG	0.0402909	0.507221
gldA	-0.00188084	0.987656
glf	0.175978	0.285937
glgA	0.138576	0.01959
glgB	0.043393	0.776403
glgC	0.0636272	0.446926
glgP	-0.028462	0.771637
glgS	0.0144654	0.904128
glgX	0.00044911	0.998434
glk	-0.0107756	0.925953
glmM	0.967672	0.48034
glnB	-0.0639725	0.520207
glnD	0.115511	0.479731
glnE	-0.00581089	0.953762
glnG	0.0936693	0.375189
glnH	-0.0207939	0.900825
glnK	0.033009	0.722263
glnL	-0.0992656	0.056504
glnP	0.00506617	0.979947
glnQ	-0.0269229	0.783376
gloA	0.0324041	0.9494
gloB	0.16188	0.21191
glpA	-0.0338793	0.762227
glpB	-0.0170839	0.856063
glpC	-0.0703609	0.0583872
glpD	0.0447493	0.253987
glpE	0.0450471	0.375117
glpF	0.0425767	0.340566
glpG	0.0781874	0.0386365
glpK	-0.0171202	0.627242
glpQ	0.0138384	0.886199
glpR	0.0211798	0.910979
glpT	-0.0443992	0.399206
glpX	0.0529107	0.345366
gltA	-0.042627	0.731212
gltD	0.105749	0.159066
gltF	-0.042965	0.817158
gltI	-0.0298852	0.698298
gltJ	0.0240348	0.838832
gltK	-0.144434	0.124597
gltL	-0.035207	0.639271
gltP	-0.00677641	0.926375
gltS	-0.00679424	0.916391
glvB	0.00884708	0.914652
glvC	0.198183	0.056504
glvG	0.0148566	0.863726
glxK	-0.0625647	0.70005
glxR	-0.125019	0.285937
glyA	NA	NA
gmd	0.013442	0.905451
gmhB	0.593254	0.94971
gmr	-0.079059	0.772154
gnd	0.00939059	0.961336
gnsA	NA	NA
gntK	0.0335358	0.834689
gntP	-0.0040337	0.975889
gntR	0.0388021	0.856277
gntT	0.00338398	0.977319
gntU	0.0246753	0.784847
gntX	0.082971	0.404979
gntY	0.190256	0.340566
gor	0.0639435	0.575545
gph	0.0145871	0.867794
gpmA	-0.0598102	0.653482
gpp	0.0614744	0.128536
gpt	-0.0987007	0.240862
greA	-0.081556	0.437092
greB	0.0144639	0.920145
groL	NA	NA
grxA	-0.0735954	0.185189
grxB	-0.0121356	0.914652
grxC	-0.0184173	0.793045
gshA	0.187135	0.0192858
gshB	0.00847716	0.954846
gsk	0.0271705	0.618737
gspA	-0.0069138	0.9494
gspC	0.0505358	0.552944
gspD	-0.00242958	0.984088
gspE	0.000517842	0.998587
gspG	-0.0888294	0.595008
gspH	0.0353562	0.655889
gss	0.0423092	0.456292
gst	0.00223143	0.99229
guaA	NA	NA
guaB	NA	NA
guaC	0.0499617	0.405836
guaD	0.000805483	0.994176
gudD	0.0355133	0.621507
gudP	-0.0180972	0.800549
gudX	-0.0369168	0.536126
gutM	-0.0349459	0.871374
gutQ	0.0762122	0.697414
hcaB	0.0968898	0.341965
hcaC	0.0330943	0.826357
hcaD	-0.0198156	0.882947
hcaE	-0.025574	0.863291
hcaF	0.0402557	0.743266
hcaR	-0.0148552	0.935928
hcaT	-0.0162352	0.908701
hchA	-0.0631944	0.479731
hcp	0.0277792	0.740097
hcr	0.00552182	0.9494
hda	-0.310947	0.945223
hdeA	0.0550083	0.539926
hdeB	-0.0556373	0.388886
hdeD	-0.0398703	0.667422
hdfR	0.0265033	0.938893
hdhA	-0.117377	0.268114
helD	-0.0465223	0.659113
hemF	0.0244767	0.763016
hemG	0.0202181	0.994307
hemN	0.0214161	0.834182
hemX	0.0902296	0.185189
hemY	0.110647	0.07512
hepA	-0.0022495	0.965281
hflC	0.0606847	0.365238
hflD	-0.0382225	0.858763
hflK	-0.00374687	0.976937
hflX	0.0263372	0.757999
hfq	0.997198	0.853797
hha	0.0211852	0.871733
hinT	-0.0896354	0.240862
hipA	0.2204	0.418965
hipB	0.142737	0.40197
hisA	-0.0947446	0.203139
hisB	0.017668	0.872587
hisC	-0.0720077	0.376621
hisD	-0.00284543	0.984088
hisF	0.00272605	0.984088
hisH	0.042319	0.552822
hisI	-0.0722959	0.123757
hisJ	-0.0689118	0.61864
hisL	-0.018336	0.860794
hisM	0.062967	0.531301
hisP	-0.0729856	0.648207
hisQ	-0.087117	0.442914
hlpA	-0.140458	0.0188503
hlyE	0.0729109	0.479365
hmp	0.0133221	0.887197
hns	0.120098	0.957357
hofB	-0.0311223	0.726776
hofC	-0.0160921	0.818142
hofQ	0.0261654	0.713368
hokA	0.0223863	0.798775
hokB	-0.0340878	0.855124
hokC	0.102771	0.0284445
hokD	0.0141702	0.94406
hokE	0.0927296	0.0656261
holC	-0.527281	0.711317
holD	-1.07613	0.838581
holE	-0.01763	0.914652
hpt	0.0249608	0.767302
hrpA	0.201155	0.684371
hrpB	-0.00645116	0.950974
hscA	0.0522098	0.840281
hscB	-0.00196949	0.996556
hscC	0.0651482	0.384845
hsdM	0.00715129	0.94971
hsdR	-0.0500806	0.731212
hsdS	0.0427914	0.545743
hslJ	-0.0365371	0.819225
hslO	0.029596	0.73389
hslR	0.00883523	0.919251
hslU	0.0201633	0.755957
hslV	0.0305301	0.659113
hsrA	-0.0721732	0.51311
htgA	-0.0555969	0.193153
htpG	-0.0608801	0.345646
htpX	-0.0558431	0.319594
htrC	0.070918	0.345646
htrE	0.0438272	0.754037
htrG	0.0360684	0.581148
hupA	-0.0661185	0.123721
hupB	-0.0651757	0.320695
hyaA	-0.0434052	0.908206
hyaB	-0.0233836	0.869535
hyaC	-0.196176	0.107626
hyaD	-0.163022	0.117112
hyaE	0.0186504	0.882435
hyaF	0.0499275	0.706545
hybA	-0.0503056	0.454142
hybB	0.0143532	0.886199
hybC	0.00608644	0.9494
hybD	-0.00592458	0.9494
hybE	-0.000918166	0.993836
hybF	0.114208	0.171235
hybG	0.0396052	0.595408
hybO	0.0712406	0.226251
hycA	-0.0133239	0.906781
hycB	-0.0118022	0.903364
hycC	-0.0216498	0.827307
hycD	-0.0694872	0.376621
hycE	-0.0187577	0.872587
hycF	0.0153465	0.863705
hycG	-0.0217019	0.782169
hycH	0.0182481	0.853797
hycI	-0.0270956	0.778495
hydN	0.03809	0.645379
hyfA	-0.0169362	0.835807
hyfB	0.0201775	0.815123
hyfC	0.0147567	0.800549
hyfD	-0.0404271	0.469216
hyfE	-0.0562026	0.340566
hyfF	0.0187875	0.828511
hyfG	0.0104676	0.926375
hyfH	0.0579898	0.297095
hyfI	-0.0595438	0.713368
hyfJ	-0.122465	0.442464
hyfR	0.0892242	0.615454
hyi	0.0047811	0.961383
hypA	-0.0111295	0.914919
hypB	0.000722019	0.995547
hypC	0.0401112	0.550662
hypD	0.00776837	0.945223
hypE	0.0135549	0.910979
hypF	0.0806517	0.240862
hyuA	0.0376208	0.440868
iaaA	-0.0760314	0.266942
iadA	-0.0315694	0.729607
iap	0.145984	0.00248261
ibpA	0.0433111	0.255516
ibpB	0.0211892	0.853797
icd	-0.151057	0.51311
icdC	-0.151908	0.106573
iclR	0.032231	0.672787
idi	0.0382731	0.476763
idnD	0.0713891	0.345646
idnK	0.0630461	0.273238
idnO	0.0659424	0.243112
idnR	0.0243863	0.784847
idnT	0.0381576	0.595077
ihfA	-0.560887	0.9494
ihfB	-0.139704	0.983426
ileS	NA	NA
ilvA	0.0137595	0.884606
ilvB	0.0155508	0.83165
ilvD	0.0299258	0.755811
ilvE	0.0328682	0.612748
ilvH	0.00917381	0.882947
ilvI	0.0137185	0.922919
ilvL	0.019364	0.757287
ilvM	0.0482162	0.435749
ilvN	0.00526638	0.926375
ilvY	0.120246	0.0142073
inaA	-0.0331467	0.607503
intA	-0.048443	0.254312
intB	0.0558533	0.345366
intD	0.0140618	0.953762
intE	0.0142512	0.929557
intF	-0.184809	0.342995
intQ	-0.0925809	0.769442
intR	-0.0385442	0.545743
intS	0.0223428	0.882947
iscA	0.00431878	0.99256
iscR	-0.0345524	0.560708
iscS	0.0161886	0.998587
iscU	-0.0929212	0.835259
ispA	NA	NA
ispU	NA	NA
ivbL	0.0104721	0.863726
ivy	-0.0688547	0.178884
katE	-0.0479531	0.862466
katG	0.14245	9.64713e-05
kbaY	0.0673093	0.264445
kbaZ	0.0108965	0.90614
kbl	0.0527243	0.268114
kch	0.109757	0.267802
kdgK	0.019722	0.816137
kdgR	-0.0596504	0.645739
kdgT	0.00100956	0.991287
kdpA	-0.0683866	0.467254
kdpB	-0.00578025	0.953903
kdpC	-0.00542765	0.949795
kdpD	-0.163459	0.291464
kdpE	-0.0279173	0.872587
kdpF	-0.0369439	0.828074
kdsC	0.032097	0.646871
kdsD	-0.0535687	0.313564
kduD	0.0842924	0.40197
kduI	-0.00162123	0.987656
kefB	0.0943842	0.196992
kefC	0.00117983	0.991118
kefF	0.00672413	0.906781
kefG	0.0108038	0.914652
kgtP	0.110413	0.220176
kil	-0.498673	0.653482
kptA	-0.0557721	0.736959
ksgA	-0.0287602	0.908701
lacA	0.0244096	0.808043
lar	0.0963897	0.761525
ldcA	-0.199794	0.761525
ldcC	0.0510251	0.164548
ldhA	0.0546391	0.673903
lepA	-0.133858	0.821606
leuA	-0.0107769	0.858231
leuB	0.017193	0.853797
leuC	-0.0374316	0.61169
leuD	-0.0751866	0.304689
leuL	0.00647391	0.945018
leuO	0.0191537	0.829132
lhr	-0.0601903	0.691581
ligB	-0.0157496	0.807454
ligT	-0.02215	0.792627
lipA	0.282313	0.922919
lipB	0.155743	0.677051
lit	-0.0585164	0.790954
livF	0.0959176	0.170817
livG	-0.0733948	0.188569
livH	0.0379177	0.670253
livJ	0.0465471	0.571941
livK	0.12094	0.230537
livM	0.0361569	0.705314
lldD	0.0210658	0.748013
lldP	0.102117	0.0138085
lldR	0.0778963	0.116163
lon	0.121624	0.494667
lpcA	0.016182	0.998587
lpd	NA	NA
lplA	-0.0257729	0.807454
lpp	-0.0451484	0.881577
lpxA	-0.0180828	0.932907
lrp	0.239926	0.000769095
lsrB	0.0600274	0.903776
lsrC	-0.0881208	0.667962
lsrD	-0.0321555	0.935928
lsrF	-0.0365934	0.834045
lsrG	0.0490617	0.867794
ltaE	-0.0478675	0.453018
luxS	0.182905	0.193153
lysA	-0.0101601	0.890712
lysC	0.00817217	0.941897
lysP	-0.0398779	0.73389
lysR	0.0522016	0.268198
lysS	-0.052767	0.748013
lysU	0.0413041	0.672787
lyxK	0.0414644	0.393153
maa	-0.0376428	0.70005
macA	-0.0115296	0.936687
macB	-0.109154	0.000587538
maeB	0.0213404	0.757009
mak	-0.0305092	0.568971
malE	0.0473613	0.245876
malG	-0.0094961	0.909084
malI	-0.083028	0.765382
malK	0.0182247	0.761525
malM	0.0756081	0.0252955
malP	0.00259588	0.985179
malQ	-0.000154706	0.998587
malS	-0.0159779	0.834002
malT	-0.0173576	0.871733
malX	-0.0426317	0.818374
malY	-0.152616	0.0678382
malZ	-0.0106443	0.910851
manA	-0.170589	0.151599
manX	-0.0767841	0.595008
manY	-0.227977	0.143549
manZ	-0.00819646	0.945223
maoC	0.0568903	0.434276
marA	0.0999651	0.650528
marC	0.1038	0.761525
marR	-0.0292492	0.881959
mazG	0.0386832	0.438965
mbhA	0.0347204	0.644696
mcrA	-0.132727	0.438965
mcrB	0.0214911	0.914652
mcrC	0.0709458	0.322847
mdaB	0.00120731	0.991505
mdh	-0.0051053	0.967492
mdlA	-0.0346715	0.433145
mdlB	-0.017935	0.853797
mdoB	0.0598572	0.240862
mdoC	-0.0143574	0.879575
mdoD	0.0296739	0.853797
mdoG	0.0163202	0.841557
mdoH	0.0296325	0.677051
mdtA	0.00928209	0.922858
mdtB	0.0243365	0.76395
mdtC	-0.0718936	0.163855
mdtD	0.144738	0.193153
mdtE	-0.0651225	0.340566
mdtF	-0.0907881	0.0412132
mdtG	-0.111748	0.144923
mdtH	-0.0740584	0.362037
mdtI	0.0168967	0.939497
mdtJ	-0.117933	0.297095
mdtK	-0.124918	0.239186
melA	0.0327914	0.750671
melB	0.0690884	0.199429
melR	0.00747867	0.959293
menA	-0.0615405	0.41991
menB	-0.00999719	0.908701
menD	-0.0303841	0.687023
menE	-0.00361531	0.980446
menF	-0.075748	0.383174
mepA	-0.0829685	0.45357
metA	0.0202867	0.781918
metB	0.0542367	0.245876
metC	0.0388176	0.486319
metE	0.065874	0.0952069
metF	0.00134047	0.992616
metH	0.0327391	0.545743
metI	0.0609927	0.502747
metJ	-0.292398	0.77435
metL	-0.43763	0.668977
metN	-0.0249942	0.697414
metQ	NA	NA
metR	0.0912758	0.0196692
mfd	-0.0531551	0.514487
mglA	-0.00127753	0.996471
mglB	-0.0352602	0.864734
mglC	0.0195735	0.890712
mgsA	0.0696495	0.151539
mgtA	0.060768	0.62589
mhpA	-0.0183939	0.850695
mhpB	-0.0147644	0.908206
mhpC	0.0909399	0.248623
mhpD	-0.0777364	0.212773
mhpE	0.056082	0.263283
mhpF	0.012374	0.908701
mhpR	0.0014217	0.993215
mhpT	-0.0207215	0.777839
miaA	-0.203457	0.463519
miaB	-0.0176039	0.86184
minC	0.0537004	0.672787
minD	0.0337289	0.688286
minE	0.0739263	0.376621
mioC	0.0242959	0.818374
mipA	-0.0761579	0.276019
mlrA	-0.0417768	0.769442
mltB	0.0553917	0.419101
mltC	0.0288936	0.77231
mltD	-0.0465061	0.748495
mmuM	-0.238963	0.479322
mmuP	-0.239341	0.404909
mngA	-0.020236	0.838581
mngB	-0.0526714	0.751218
mngR	-0.0163633	0.945223
mntH	-0.00315292	0.987656
mntR	0.0102526	0.935928
moaA	-0.031761	0.790954
moaB	-0.0167942	0.908701
moaC	-0.00607448	0.965281
moaD	-0.0220944	0.867219
moaE	0.0103297	0.9478
mobB	0.0161547	0.793942
modA	-0.0897946	0.479731
modB	-0.0630418	0.641395
modC	0.0321316	0.835807
modE	-0.0316741	0.863726
modF	-0.0131467	0.928517
moeA	0.0225098	0.900228
moeB	0.00215534	0.992616
mog	0.0335308	0.714567
motA	-0.0468266	0.771637
motB	-0.025763	0.858231
mpaA	-0.0263669	0.869535
mpl	-0.0237698	0.714567
mppA	0.0175943	0.94971
mprA	-0.0769371	0.672787
mqo	-0.0702743	0.168038
mraW	-0.0332397	0.871733
mraZ	-0.0289002	0.650528
mrcA	0.0336126	0.70005
mrcB	0.0319299	0.895504
mreD	NA	NA
mrp	0.0111407	0.9494
mrr	0.0383678	0.659113
mscL	0.0693043	0.0535648
msrA	-0.0372991	0.61169
msyB	-0.0665338	0.26665
mtgA	0.0200166	0.758854
mtlA	0.0303503	0.722569
mtlD	0.0492716	0.399374
mtlR	-0.0390181	0.650528
mtr	0.0703558	0.362037
murP	0.0280121	0.782169
mutH	-0.197296	0.876929
mutL	NA	NA
mutM	-0.00380562	0.94971
mutS	NA	NA
mutT	NA	NA
mutY	0.043393	0.595077
mviM	-0.0336914	0.577651
nac	-0.047421	0.514487
nadA	0.68517	0.00189521
nadB	0.376221	0.19716
nadC	0.433907	0.100502
nadR	-0.00331264	0.987656
nagA	-0.0840621	0.874223
nagB	-0.0487196	0.40596
nagC	-0.0876121	0.988906
nagD	0.0078715	0.945223
nagE	-0.136887	0.00107773
nagZ	-0.0930988	0.393153
nanA	0.0280556	0.743266
nanE	0.0673601	0.123721
nanR	-0.0281665	0.70005
nanT	0.038446	0.383174
napA	0.0110852	0.873855
napB	-0.0128265	0.884277
napC	-0.0376516	0.597896
napD	-0.0558658	0.31191
napF	0.0254745	0.793045
napG	0.0152426	0.872587
napH	-0.0153738	0.863726
narG	-0.017067	0.914919
narH	-0.0291322	0.83165
narJ	-0.0800351	0.387158
narK	0.0424215	0.786089
narL	-0.0593462	0.646559
narQ	0.0317226	0.67944
narU	0.0533754	0.867794
narV	0.0354346	0.827307
narW	-0.106578	0.438965
narX	-0.0462098	0.650528
narY	-0.0411297	0.83165
narZ	-0.0317647	0.874475
ndh	-0.029551	0.914652
ndk	0.148788	0.427408
nemA	-0.0708658	0.74064
nfi	0.240748	0.00950218
nfo	-0.0894192	0.220503
nfrA	-0.0141191	0.940058
nfrB	0.071482	0.439177
nfsA	-0.0637219	0.232189
nhaA	0.0537535	0.892628
nhaB	-0.000538569	0.998587
nhaR	-0.076595	0.0968597
nhoA	0.0187314	0.908701
nikA	-0.00407182	0.970458
nikB	0.0168863	0.851385
nikC	0.0173372	0.857778
nikD	0.100074	0.500867
nikE	0.0256485	0.793942
nikR	0.0072633	0.945223
ninE	0.0847736	0.803314
nirB	0.0201273	0.827307
nirC	0.0228763	0.713105
nirD	0.00554271	0.945223
nlpA	0.0601226	0.119158
nlpB	-0.0106866	0.897026
nlpC	-0.0848588	0.696958
nlpD	-0.0455875	0.479731
nlpE	0.101301	0.112902
nlpI	-0.145919	0.536126
nmpC	0.0380373	0.782169
norR	0.020222	0.834045
norV	0.0103147	0.9494
norW	-0.0535119	0.268198
npr	-0.0652674	0.100245
nrdD	-0.0437343	0.70005
nrdE	-0.01278	0.922769
nrdF	-0.0597854	0.333215
nrdG	-0.046746	0.581148
nrdH	-0.0104893	0.917805
nrdI	0.0112375	0.908701
nrfA	-0.0162235	0.772536
nrfB	-0.0325569	0.595283
nrfC	-0.0151127	0.83165
nrfD	0.00102147	0.990596
nrfE	-0.00239659	0.980454
nrfF	0.0169012	0.805618
nrfG	-0.00461438	0.9494
nth	-0.0482423	0.853797
nudB	0.113188	0.922858
nudC	0.0399238	0.399309
nudD	-0.0421732	0.289929
nudF	-0.010777	0.905451
nudG	-0.182473	0.0864427
nudH	0.233789	0.788762
nuoA	0.0517108	0.761525
nuoB	0.118562	0.39969
nuoC	0.0601168	0.670243
nuoE	0.0226895	0.945018
nuoG	0.0159238	0.890712
nuoH	-0.0305344	0.869535
nuoI	NA	NA
nuoJ	0.0952667	0.761913
nuoM	0.0770582	0.79468
nuoN	-0.0215961	0.872587
nupC	0.0177956	0.850467
nupG	-0.06342	0.42891
nusB	0.18609	0.875776
ogrK	0.0294895	0.575163
ogt	-0.0713381	0.648207
ompA	-0.188768	0.76451
ompC	-0.402353	0.576144
ompF	0.0883535	0.374885
ompG	0.0498668	0.839663
ompL	0.0456838	0.309707
ompN	0.0582133	0.807247
ompR	1.14907	0.76395
ompT	-0.105354	0.119158
ompW	-0.0598365	0.607503
ompX	0.00688175	0.96138
oppB	-0.0261026	0.882435
oppC	-0.0507266	0.684371
oppD	-0.0694165	0.404167
oppF	-0.0842615	0.388147
osmB	-0.164175	0.423745
osmC	0.0237509	0.908701
osmE	-0.135095	0.304689
osmY	-0.0448489	0.520207
otsA	-0.0196554	0.926375
otsB	0.0141014	0.909156
oxc	-0.0870156	0.552825
oxyR	0.0932872	0.884606
paaA	0.00346668	0.970568
paaB	0.0271892	0.800833
paaC	-0.0919435	0.123757
paaD	-0.00491731	0.961033
paaE	-0.0787772	0.721547
paaF	-0.0340665	0.6034
paaG	-0.0817253	0.391114
paaH	0.0522478	0.445435
paaI	-0.0572725	0.648995
paaJ	0.051673	0.761525
paaK	0.0505585	0.736779
paaX	-0.0272594	0.903776
paaY	0.123165	0.545743
pabA	0.0649842	0.240862
pabB	-0.0408938	0.646559
pabC	0.0469041	0.67944
pal	0.25197	0.648207
panB	0.151123	0.0802574
panC	0.154159	0.0330259
panD	0.102768	0.050214
panE	0.0551164	0.41399
panF	0.0714605	0.159066
pbl	0.0423435	0.713368
pbpC	-0.0333903	0.616955
pbpG	-0.0427602	0.567597
pck	0.0475322	0.408401
pcm	0.0264305	0.837136
pcnB	-0.00219846	0.99256
pdhR	0.0386113	0.755957
pdxA	0.0205678	0.987656
pdxB	0.199767	0.889282
pdxJ	-0.125775	0.882947
pdxK	0.0138419	0.827307
pdxY	-0.0406705	0.940058
pepA	-0.0233197	0.736394
pepB	0.0125089	0.933607
pepD	-0.0593562	0.61864
pepE	0.0214901	0.818142
pepN	0.0998871	0.359146
pepP	0.0235931	0.80939
pepQ	-0.0550845	0.151539
pepT	-0.0830359	0.378763
perR	-0.560887	0.94971
pfkA	0.0665097	0.929557
pfkB	-0.0122298	0.9494
pflA	0.0527867	0.771637
pflB	0.0105165	0.953762
pflC	0.0639757	0.161237
pflD	0.0314902	0.620246
pfs	0.596339	0.884022
pgi	-0.161769	0.885646
pgm	-0.0135339	0.96759
pgpA	0.0439698	0.96558
pgpB	-0.182911	0.744802
pheA	0.173217	0.0305297
pheL	0.00981847	0.9494
pheP	0.0143921	0.884022
phnB	-0.0339559	0.706545
phnC	-0.0439392	0.548342
phnD	-0.0081841	0.948201
phnE	-0.0479013	0.467254
phnF	-0.093389	0.0330259
phnG	-0.0899616	0.163855
phnH	-0.0472278	0.543419
phnI	-0.0620105	0.361094
phnJ	-0.0276034	0.787759
phnK	-0.0710683	0.24852
phnL	-0.0263063	0.806122
phnM	0.0991592	0.254783
phnN	0.0771889	0.372322
phnO	-0.0358105	0.701929
phnP	-0.000761227	0.996471
phoA	0.02927	0.646559
phoB	-0.0164486	0.761525
phoE	-0.0289548	0.825364
phoH	0.0169311	0.851385
phoP	-0.611834	0.773144
phoQ	-1.71503	0.853797
phoR	0.05719	0.192312
phoU	0.0690788	0.023902
php	0.0157857	0.863726
phr	-0.0189635	0.853258
pin	0.0238737	0.885012
pinH	-0.059315	0.814322
pinQ	-0.272357	0.374819
pioO	-0.020158	0.750671
pitA	0.0739283	0.218176
pitB	-0.0305181	0.70005
pldA	0.0841902	0.24852
pldB	0.0273819	0.761525
plsB	0.234435	0.219053
plsX	-0.0358295	0.687999
pmbA	-0.0518377	0.378645
pmrD	-0.00986807	0.927586
pncA	-0.0115476	0.919364
pncB	0.00224295	0.990312
pnp	-0.0107882	0.936687
pntA	-0.0609636	0.707397
pntB	-0.118047	0.345646
pnuC	0.00688314	0.959585
polA	0.0699327	0.382683
polB	0.0230762	0.818374
potA	-0.0581111	0.701929
potB	-0.0973174	0.185189
potC	-0.113019	0.0375039
potD	-0.0445553	0.562028
potE	-0.00204108	0.990312
potF	0.00978112	0.9478
potG	-0.0597786	0.376621
potH	-0.0644911	0.423745
potI	-0.082026	0.293593
poxA	-0.0846589	0.488145
poxB	0.0186567	0.817157
ppc	0.0579364	0.908266
ppdA	0.010092	0.871733
ppdB	0.00632174	0.936687
ppdC	-0.0320826	0.548342
ppdD	0.0513427	0.672787
pphA	0.00278755	0.988499
pphB	0.0335428	0.743348
ppiA	-0.0162671	0.76395
ppiB	-0.0501448	0.553359
ppiD	0.0736856	0.202684
ppk	-0.247526	0.744802
pppA	0.0110372	0.909084
pps	0.0216387	0.908701
ppx	0.0280233	0.884022
pqiA	-0.0569383	0.70005
pqiB	0.0670735	0.545743
pqqL	0.0201711	0.884022
prc	-0.15999	0.76067
prfC	-0.188772	0.00248261
prfH	-0.069295	0.388147
priA	0.099126	0.209081
priB	NA	NA
priC	-0.0218576	0.681723
prkB	0.0686212	0.24852
prlC	-0.0156763	0.810515
prmA	0.171996	3.69311e-07
prmB	-0.428643	0.731212
prmC	NA	NA
proA	-0.0516503	0.731397
proB	-0.0937044	0.378645
proC	0.180503	0.731255
proP	-0.0523697	0.373329
proQ	-0.21513	0.251055
proV	-0.00785932	0.945018
proW	0.0386844	0.605954
proX	-0.049013	0.590305
proY	-0.077355	0.0194617
prpB	0.00548125	0.984088
prpC	0.048714	0.782169
prpD	0.0425376	0.76451
prpE	0.0403853	0.685423
prpR	0.105455	0.314621
psiF	-0.0552441	0.416185
pspA	-0.0701945	0.0880893
pspB	-0.0508601	0.6116
pspC	-0.061968	0.408401
pspD	0.0314711	0.889282
pspE	-0.0532135	0.620818
pspF	-0.0680675	0.3881
pstA	-0.545757	0.377438
pstB	-0.0250147	0.81801
pstS	0.0507422	0.788829
pta	0.0125929	0.993347
ptr	-0.00769422	0.922858
ptrB	NA	NA
ptsA	-0.00474455	0.953762
ptsG	-0.143686	0.510754
ptsI	0.706829	0.656663
ptsN	0.150595	0.000471496
ptsP	-0.0728635	0.297471
purA	-2.29017	0.274199
purB	NA	NA
purC	-0.118693	0.910979
purD	-0.137008	0.892783
purE	-0.53743	0.672787
purF	-0.348943	0.851953
purH	-0.625637	0.441779
purK	-0.342184	0.772735
purL	-0.0253872	0.987656
purM	-0.607633	0.683902
purN	-0.033679	0.922919
purR	-0.0196073	0.908701
purT	-0.0576566	0.714567
purU	-0.151014	0.376621
puuA	-0.0425234	0.70005
puuB	-0.0520221	0.70005
puuC	-0.0101378	0.961383
puuD	-0.114816	0.0864427
puuE	-0.0409033	0.76451
puuP	-0.050774	0.545743
puuR	-0.0794759	0.142785
pykA	0.0300169	0.710146
pykF	-0.0476486	0.804187
pyrB	-1.13796	0.906781
pyrC	-1.33753	0.581146
pyrD	-0.560887	0.94971
pyrF	-1.48692	0.3881
pyrI	0.0834955	0.126562
pyrL	0.143801	0.0508819
qor	0.0353793	0.626031
qseB	-0.0196857	0.854642
qseC	0.0889522	0.550938
queA	-0.0140024	0.852045
racC	-0.34754	0.780196
radA	0.0519509	0.237151
rarA	-0.09756	0.199429
rarD	-0.00208697	0.987038
rbbA	0.007369	0.945223
rbfA	-0.020556	0.996471
rbn	0.0924153	0.091409
rbsA	0.1085	0.0194617
rbsB	0.0234904	0.879595
rbsC	0.0941686	0.0485878
rbsD	0.0591225	0.212826
rbsK	0.0431245	0.645379
rbsR	-0.0608257	0.40197
rcsA	-0.0678716	0.592578
rcsD	-0.0131362	0.902166
rcsF	0.0377228	0.658915
rdgC	0.0387668	0.571941
recA	-0.724564	0.588833
recB	-0.248972	0.670243
recC	0.169388	0.808798
recD	0.0438354	0.441779
recE	0.048609	0.906421
recF	-0.0489981	0.590305
recG	0.156568	0.545743
recJ	-0.144062	0.0156309
recN	-0.0131512	0.905451
recO	-0.204357	0.123721
recQ	0.00389075	0.968748
recR	-0.0345913	0.892763
recT	0.0608866	0.674467
recX	0.0807787	0.494859
relA	-0.199799	0.40596
relE	-0.0792283	0.470975
rem	-0.068209	0.106573
renD	0.0748756	0.40596
rep	0.0644411	0.922858
rfaB	0.197255	0.0718269
rfaC	NA	NA
rfaD	-0.0962529	0.971419
rfaE	-0.54767	0.887197
rfaF	0.369834	0.804187
rfaG	-0.0734666	0.785958
rfaH	-0.0774046	0.900825
rfaI	0.0879506	0.375189
rfaJ	0.145744	0.0102827
rfaK	0.0622086	0.13862
rfaL	0.0480727	0.359146
rfaQ	-0.00537201	0.961383
rfaS	0.0744558	0.10347
rfaY	0.0431206	0.707397
rfaZ	-0.0129814	0.953762
rfbA	-0.0867489	0.577651
rfbB	-0.103569	0.172602
rfbC	0.0626573	0.61169
rfbD	-0.020563	0.836766
rfbX	0.0144328	0.92766
rfe	0.0431473	0.710848
rffA	-0.152146	0.623585
rffC	0.121716	0.908206
rffD	0.0822018	0.0412132
rffE	0.143837	0.0887305
rffG	0.0695605	0.117112
rffH	0.00597639	0.9494
rffM	0.155813	9.64713e-05
rffT	0.154432	0.00248261
rhaA	-0.0203695	0.839663
rhaB	-0.0151919	0.800833
rhaD	0.0357444	0.542509
rhaR	0.0117636	0.917872
rhaS	-0.0237556	0.765382
rhaT	-0.00138913	0.99256
rhlB	-0.0348937	0.678413
rhlE	0.00238509	0.987656
rhoL	0.132597	0.01959
rhsD	-0.097103	0.715567
rhsE	0.0126691	0.983426
rhtA	0.0284313	0.757999
rhtB	0.0377044	0.62589
rhtC	0.0189893	0.808798
rihA	-0.130882	0.545743
rihB	0.0745402	0.442764
rihC	0.0360233	0.43716
rimI	-0.0288769	0.79468
rimJ	-0.0276963	0.766736
rimK	-0.064086	0.282582
rimL	0.00629726	0.983426
rimM	NA	NA
rlmB	0.0216849	0.827307
rlpA	0.0223559	0.851385
rluA	-0.0324795	0.545743
rluB	-0.223941	0.0321211
rluC	0.201089	0.123757
rluD	-0.0788379	0.453995
rmf	0.104084	0.376621
rmuC	-0.0275794	0.659113
rna	0.011742	0.945223
rnb	-0.0888976	0.606816
rnc	-1.13796	0.906781
rnd	-0.0873973	0.376621
rng	-0.0630229	0.545743
rnhA	0.0219962	0.963254
rnhB	-0.0114743	0.895642
rnk	-0.0217709	0.822084
rnr	NA	NA
rnt	-0.370126	0.590305
rob	-0.0208811	0.76395
rof	0.0744936	0.317481
rpe	-0.0158907	0.992616
rph	0.0219328	0.78933
rpiA	0.81159	0.61169
rpiB	-0.0192624	0.839663
rpiR	-0.0687796	0.268114
rplD	NA	NA
rplI	-0.0108877	0.968748
rplU	-1.74348	0.744899
rpmA	NA	NA
rpmB	-0.414885	0.851385
rpmE	0.292277	0.0114059
rpmF	0.114164	0.922919
rpmH	0.403305	0.908701
rpmI	-0.669459	0.895287
rpmJ	-0.573966	0.740801
rpoD	-0.215459	0.889282
rpoS	-0.282282	0.000471496
rpoZ	-0.0252496	0.653482
rpsO	-0.339842	0.806122
rpsT	0.189344	0.251775
rpsU	-0.288536	0.850553
rraA	0.0914221	0.0102827
rrmA	-0.0490353	0.706022
rrmJ	NA	NA
rsd	0.0376081	0.36879
rseB	0.0157648	0.900825
rseC	-0.0436939	0.581148
rsgA	NA	NA
rsmB	0.0409296	0.458675
rsmC	0.099936	0.19716
rspA	-0.0593924	0.531305
rspB	-0.16934	0.538937
rssA	-0.297091	0.0508819
rssB	0.0576459	0.863726
rstA	-0.0456695	0.782169
rstB	-0.142703	0.231864
rsuA	-0.0407816	0.68451
rsxA	-0.210741	0.215168
rsxB	-0.0522743	0.884022
rsxC	0.0990734	0.761525
rsxD	0.113577	0.548342
rsxE	-0.0517534	0.884752
rsxG	-0.0293795	0.914652
rtcA	-0.0395553	0.713368
rtcB	0.0609799	0.384006
rtcR	-0.0247172	0.884022
rtn	-0.15408	0.170901
rumA	-0.14716	0.000516323
rumB	-0.0357013	0.707397
rusA	-0.0622591	0.807454
ruvA	-0.400318	0.270069
ruvB	-0.134009	0.856277
ruvC	-0.316136	0.435932
rzoD	-0.00185198	0.993347
rzpD	0.0121345	0.948201
sanA	-0.0747389	0.757747
sapA	-0.0359505	0.839055
sapB	0.0990622	0.414841
sapC	-0.0249276	0.872587
sapD	0.0781759	0.50304
sapF	0.0502251	0.789421
sbcB	-0.0767249	0.0379186
sbcC	-0.0147489	0.853797
sbcD	-0.0544917	0.279937
sbmA	0.0112103	0.88882
sbmC	-0.181139	0.0508819
sbp	0.0517666	0.285729
sdaA	-0.00877715	0.928517
sdaB	-0.00842999	0.892985
sdaC	0.00818751	0.931998
sdhA	NA	NA
sdhB	-0.0501479	0.408401
sdhC	0.0165344	0.890712
sdhD	0.00262536	0.968748
sdiA	0.00348479	0.98642
secB	0.0777114	0.408401
secD	NA	NA
secF	0.016182	0.998587
secG	0.0480418	0.930099
selA	0.0394613	0.368662
selB	-0.0325683	0.73856
selD	-0.1134	0.271631
seqA	0.183973	0.800833
serA	0.502759	0.0102827
serB	0.199142	0.289929
serC	0.158414	0.820608
setA	0.0106671	0.905577
setB	-0.097279	0.212773
setC	0.0457446	0.388886
sfcA	-0.00882857	0.963254
sfmA	-0.00304707	0.995499
sfmC	0.0641343	0.703865
sfmF	-0.0739565	0.362037
sfmH	0.0164468	0.917805
sfsB	0.0489777	0.404167
sgbE	0.0186318	0.820619
sgbH	0.0237106	0.70005
sgbU	0.0736446	0.2314
sgcB	0.0058527	0.9494
sgcC	-0.00577148	0.9494
sgcE	-0.0509147	0.533684
sgcQ	0.0690979	0.178884
sgcR	-0.0483142	0.545743
sgcX	-0.0307867	0.698298
sgrR	0.00766993	0.918453
shiA	-0.0673556	0.526119
sieB	-0.0547799	0.853425
sixA	0.0506785	0.479731
slp	0.045321	0.62948
slt	-0.0249589	0.725682
slyA	-0.125699	0.155178
slyB	-0.0207434	0.886199
slyD	0.0825027	0.215168
slyX	0.0354186	0.571596
smf	0.0260255	0.545743
smg	0.050216	0.30969
smpA	-0.0801836	0.352005
smpB	0.0419432	0.955694
smtA	0.0559078	0.416185
sodA	0.0502197	0.445435
sodB	0.00545718	0.982708
sodC	-0.125244	0.285937
sohA	0.418829	0.569766
sohB	-0.152153	0.174565
solA	0.0748537	0.552944
soxR	-0.0323221	0.467864
soxS	-0.0038357	0.957357
speA	-0.068238	0.418814
speB	0.115437	0.345366
speC	-0.0621907	0.200734
speD	-0.131994	0.00210581
speE	-0.263522	0.142302
speF	-0.0155385	0.871733
speG	0.121081	0.685769
sppA	-0.0804136	0.393153
spr	0.0202672	0.903475
sprT	0.104851	0.382876
spy	-0.00704424	0.953903
sra	-0.234131	0.200734
srlA	0.122271	0.263283
srlB	0.0134758	0.869535
srlD	-0.0184887	0.852045
srlE	0.0564247	0.43894
srlR	-0.0958779	0.195162
srmB	0.0700379	0.795823
sseA	-0.0207747	0.906421
sseB	0.00966841	0.945018
ssnA	0.0258568	0.674925
sspA	-0.0478741	0.552858
sspB	0.0389711	0.240862
sstT	0.0538942	0.340566
ssuB	0.0181098	0.917805
ssuC	-0.0456779	0.650528
ssuD	-0.00607244	0.9494
ssuE	-0.0539558	0.668338
stfE	-0.160523	0.221688
stfQ	-0.136484	0.677714
stfR	0.00576931	0.970411
sthA	0.0558972	0.143549
stpA	-0.0400631	0.650853
sucB	0.0790885	0.123721
sucC	0.0109614	0.918453
sucD	0.0547018	0.545743
sufA	-0.13267	0.376621
sufB	-0.0862156	0.292986
sufC	-0.011737	0.9494
sufD	-0.0702839	0.687347
sufE	0.0268796	0.853797
sufI	0.0279089	0.60913
sufS	-0.0173011	0.913765
sulA	-0.123255	0.639554
surA	-0.127745	0.922858
surE	0.0474195	0.61169
syd	-0.0588239	0.439177
tag	-0.0187137	0.762227
talA	0.0121874	0.911661
talB	-0.0553416	0.077189
tam	-0.13203	0.479731
tap	-0.012674	0.922485
tar	-0.033742	0.767302
tas	0.037456	0.352005
tatA	0.0307357	0.552944
tatB	-0.136921	0.914652
tatE	-0.000353795	0.998587
tauA	-0.0414801	0.567597
tauB	0.0306413	0.658915
tauC	-0.0298117	0.684371
tauD	0.0379	0.486645
tbpA	0.0194326	0.792627
tdcA	0.0259899	0.876929
tdcB	0.171464	0.433145
tdcC	0.0502578	0.573346
tdcF	-0.0471106	0.431672
tdcG	0.0335576	0.665666
tdcR	0.0577346	0.335607
tdh	0.0771679	0.0450328
tdk	-0.0102117	0.953903
tehA	0.0131121	0.948172
tehB	-0.115873	0.471436
tesA	-0.110351	0.108782
tesB	0.0370467	0.665997
tfaD	0.0440027	0.677051
tfaE	-0.07641	0.536126
tfaS	0.0211944	0.900063
tgt	-0.00236755	0.988495
thiC	0.0560979	0.236252
thiD	0.0401747	0.827307
thiE	0.151055	0.0041966
thiF	0.0974887	0.126562
thiG	0.0661336	0.298715
thiH	0.0979832	0.0766091
thiI	0.030363	0.867794
thiM	0.0888207	0.713105
thiP	-0.0466618	0.222769
thiQ	0.0277625	0.536126
thiS	0.0780517	0.340566
thrA	-0.0130673	0.851385
thrB	0.0629094	0.077189
thrC	0.0249518	0.568503
thrL	0.0271254	0.629227
tiaE	0.0468231	0.396797
tig	-0.103595	0.0787325
tktB	-0.0317702	0.46939
tldD	-0.00479602	0.933607
tolA	-0.4148	0.607162
tolB	0.247151	0.874433
tolC	NA	NA
tolQ	0.17766	0.767028
tolR	-0.251147	0.874849
tonB	-0.0265664	0.910511
topB	0.016187	0.933607
torA	-0.0335646	0.620411
torC	-0.00664828	0.95085
torD	NA	NA
torI	0.0284422	0.79468
torR	-0.0523832	0.479731
torS	-0.0138302	0.931827
torT	0.0870773	0.713028
torY	-0.0688727	0.302688
torZ	-0.00922953	0.916391
tpiA	0.016182	0.998587
tpr	0.0823456	0.717701
treA	-0.0254572	0.871733
treB	0.016774	0.807479
treC	-0.0347226	0.825364
treF	0.091893	0.091409
treR	0.0682991	0.267802
trg	-0.0345108	0.838581
trkA	0.157628	0.261956
trkD	0.105347	0.314621
trkG	-0.0083442	0.953762
trkH	0.110107	0.0315686
trmA	0.0299347	0.645721
trmC	-0.0277918	0.800833
trmE	-0.461879	0.495109
trmH	0.0792368	0.050214
trmU	-0.416225	0.650528
trpA	-0.272307	0.727078
trpB	-0.16589	0.906781
trpC	-0.174121	0.240862
trpD	-0.161967	0.45107
trpE	-0.15081	0.827307
trpL	-0.101093	0.378952
trpR	-0.0273797	0.670243
truA	0.243377	0.704282
truB	0.0166644	0.903364
truD	0.00510845	0.961383
trxA	0.37188	1.52441e-08
trxB	0.0834319	0.539863
trxC	0.131303	0.117112
tsgA	0.0515229	0.546373
tsr	0.0547712	0.363984
ttdA	0.0300045	0.70005
ttdB	-0.0133923	0.876374
tus	0.0400528	0.871374
tynA	-0.00946013	0.939497
tyrA	0.0339897	0.582651
tyrB	0.0346221	0.522308
tyrP	0.0417323	0.757999
tyrR	0.0910321	0.322847
ubiB	0.049937	0.989493
ubiC	0.0211289	0.757009
ubiD	-0.0443364	0.552944
ubiF	-0.228085	0.782169
ubiG	-0.0478972	0.573089
ubiH	-1.13796	0.867219
ubiX	-0.622036	0.884022
ucpA	0.0296598	0.64706
udk	-0.0446828	0.669589
udp	0.0544765	0.363261
ugd	-0.0248955	0.933124
ugpA	0.0506097	0.595008
ugpB	0.0599324	0.26946
ugpC	-0.0127953	0.885646
ugpE	0.0528212	0.471436
ugpQ	-0.0129783	0.882435
uhpA	0.0163337	0.713041
uhpB	0.00489055	0.954846
uhpC	0.0589714	0.237314
uhpT	0.0506114	0.595008
uidA	-0.135607	0.661732
uidB	-0.0940805	0.713105
uidC	-0.0506616	0.838581
ulaA	0.0536283	0.285937
ulaB	0.118469	0.000540108
ulaC	0.0890125	0.0379186
ulaD	0.0129354	0.853191
ulaE	0.0609099	0.552944
ulaF	-0.00920634	0.922858
ulaG	-0.0324688	0.606543
ulaR	0.109859	0.162203
umuC	-0.0973549	0.417124
umuD	-0.163971	0.0379186
ung	-0.000171952	0.998587
upp	-0.0391733	0.738582
uraA	0.0608881	0.67944
usg	-0.0593393	0.37686
ushA	0.028794	0.659113
uspA	0.0356683	0.681633
uspE	0.00235395	0.990596
uspF	0.00304374	0.99256
uspG	-0.0305532	0.744802
uup	-0.232944	0.245876
uvrA	-0.165001	0.013112
uvrB	-0.286374	0.330275
uvrC	-0.151048	0.0631708
uvrD	NA	NA
uvrY	-0.055696	0.823737
uxaA	0.0111019	0.851385
uxaB	-0.0423969	0.740433
uxaC	-0.00628986	0.922858
uxuA	-5.65131e-05	0.999015
uxuB	-1.13796	0.863726
uxuR	0.007827	0.94971
vacJ	-0.0207963	0.94406
visC	-0.0103162	0.968703
vsr	-0.0516276	0.735168
wbbH	-0.0794374	0.716909
wbbI	0.0986436	0.661732
wbbJ	0.0622505	0.835807
wbbK	-0.046468	0.818374
wcaA	-0.0489043	0.449508
wcaB	-0.028131	0.782169
wcaC	-0.0968231	0.0261334
wcaD	-0.0736728	0.193153
wcaE	-0.0634056	0.765889
wcaF	-0.116294	0.0193579
wcaI	-0.0952439	0.204778
wcaJ	-0.00713263	0.959965
wcaK	-0.0333261	0.821783
wcaL	-0.0566767	0.59102
wcaM	NA	NA
wrbA	0.0567671	0.556629
wza	-0.0586886	0.714567
wzb	0.00845349	0.94971
wzc	-0.0761927	0.367909
wzxC	-0.0751476	0.189098
wzxE	-0.400546	0.918301
wzzE	-0.0914541	0.319594
xapA	-0.132716	0.288301
xapB	0.00904347	0.911309
xapR	0.0160047	0.853797
xdhA	0.226289	0.000167453
[truncated: 1,681 more rows]

## Sheet: 8h_10_to_1
strain	log2(fold-change)	adjusted p-value
aaeA	-0.0187404	0.998965
aaeB	-0.0257687	0.998965
aaeR	0.0291838	0.998965
aaeX	-0.0109221	0.998965
aas	-0.00374038	0.998965
aat	0.0244033	0.998965
abgA	-0.0242185	0.998965
abgB	-0.142215	0.998965
abgR	0.03185	0.998965
abgT	-0.00326407	0.998965
abrB	0.0354888	0.998965
aceA	0.0180072	0.998965
aceB	0.0162434	0.998965
aceE	NA	NA
aceF	0.327939	0.998965
aceK	0.0243384	0.998965
ackA	-0.246157	0.998965
acnA	-0.0432653	0.998965
acnB	-0.0530928	0.998965
acpT	-0.0100446	0.998965
acrA	-0.0219546	0.998965
acrB	0.117989	0.998965
acrD	-0.00690896	0.998965
acrE	-0.0968734	0.998965
acrF	0.017486	0.998965
acrR	0.0412122	0.998965
acs	0.0521897	0.998965
actP	0.0499073	0.998965
ada	-0.00567667	0.998965
add	-0.15215	0.998965
ade	0.00186801	0.998965
adhE	-0.159156	0.998965
adhP	0.00238602	0.998965
adiA	0.0689228	0.998965
adiC	0.044115	0.998965
adiY	0.00878511	0.998965
aegA	-0.0299976	0.998965
aer	0.0105123	0.998965
aes	0.0259162	0.998965
afuB	0.249086	0.998965
afuC	0.29249	0.998965
agaA	0.0038246	0.998965
agaB	-0.0104543	0.998965
agaD	0.0230334	0.998965
agaI	0.0484809	0.998965
agaR	-0.0404166	0.998965
agaS	-0.0305	0.998965
agaV	-0.00472938	0.998965
agaW	-0.0413821	0.998965
agp	-0.0429595	0.998965
ahpF	-0.00155915	0.998965
aidB	-0.00168511	0.998965
ais	-0.0183978	0.998965
aldB	0.0182783	0.998965
alkA	0.0530979	0.998965
alkB	0.0694032	0.998965
allA	0.0211356	0.998965
allB	-0.0418553	0.998965
allC	-0.0132574	0.998965
allD	-0.0302292	0.998965
allR	-0.00446434	0.998965
alpA	0.00588181	0.998965
alr	-6.89913e-05	0.999587
alsA	0.0426473	0.998965
alsB	0.0578878	0.998965
alsC	0.0460918	0.998965
alsE	0.0669123	0.998965
alx	0.0481202	0.998965
amiA	0.00471888	0.998965
amiB	0.0291662	0.998965
amn	-0.0521099	0.998965
ampD	-0.0402988	0.998965
ampE	-0.0958742	0.998965
ampG	-0.0136249	0.998965
ampH	0.00920836	0.998965
amtB	-0.0846924	0.998965
amyA	-0.054564	0.998965
ansA	0.0087007	0.998965
ansB	0.0211882	0.998965
ansP	-0.0118479	0.998965
apaG	0.0359943	0.998965
apaH	0.00181521	0.998965
aphA	0.0457176	0.998965
appA	0.0276348	0.998965
appB	-0.00241796	0.998965
appC	-0.053367	0.998965
apt	0.0583262	0.998965
aqpZ	0.0421463	0.998965
araA	NA	NA
araB	NA	NA
araC	-0.032781	0.998965
araE	0.00151588	0.998965
araF	0.0738046	0.998965
araG	-0.0519378	0.998965
araH	0.0189131	0.998965
araJ	0.0351415	0.998965
arcA	0.00467943	0.999587
arcB	-0.189976	0.998965
argA	-0.00694406	0.998965
argB	0.0072845	0.998965
argC	-0.0212324	0.998965
argD	NA	NA
argE	-0.0477994	0.998965
argF	0.351846	0.998965
argG	0.0404001	0.998965
argH	0.0206851	0.998965
argO	0.096039	0.998965
argP	0.0027671	0.998965
argT	-0.0210233	0.998965
arnT	-0.00864456	0.998965
aroA	-0.0768573	0.998965
aroB	-0.0366401	0.998965
aroC	-0.083183	0.998965
aroD	-0.416775	0.959618
aroE	NA	NA
aroF	0.0192912	0.998965
aroG	0.06327	0.998965
aroH	-0.0197269	0.998965
aroL	0.0459552	0.998965
aroM	-0.010572	0.998965
aroP	0.0135096	0.998965
arpA	0.0252813	0.998965
arsB	0.00207421	0.998965
arsC	-0.0236491	0.998965
arsR	-0.0122821	0.998965
artI	-0.0394256	0.998965
artJ	-0.00981496	0.998965
artM	0.0250946	0.998965
artP	-0.0559158	0.998965
artQ	0.00850225	0.998965
ascB	0.00348326	0.998965
ascF	0.0653747	0.998965
ascG	0.0672901	0.998965
aslA	0.00332706	0.998965
aslB	0.0182838	0.998965
asmA	0.193449	0.998965
asnA	0.00763844	0.998965
asnB	-0.0194469	0.998965
asnC	-0.0593194	0.998965
aspA	-0.101182	0.998965
aspC	0.135053	0.998965
asr	-0.0550451	0.998965
astA	-0.0318279	0.998965
astB	-0.018506	0.998965
astC	0.032238	0.998965
astD	-0.0511935	0.998965
astE	0.124032	0.998965
atoA	-0.0586531	0.998965
atoB	-0.0297112	0.998965
atoC	0.0229553	0.998965
atoD	-0.0334959	0.998965
atoE	0.0589542	0.998965
atoS	0.000108431	0.999587
atpA	-0.397704	0.998965
atpB	-0.556344	0.998965
atpC	-0.361796	0.998965
atpE	-0.427588	0.998965
atpF	-0.445715	0.998965
atpG	-0.340774	0.998965
atpI	-0.0344145	0.998965
avtA	0.0281057	0.998965
azoR	0.0886604	0.998965
bacA	0.0106666	0.998965
baeR	-0.0420644	0.998965
baeS	0.0135299	0.998965
barA	-0.0244376	0.998965
basR	0.0321006	0.998965
basS	0.108478	0.998965
bax	0.020608	0.998965
bcp	-0.0236959	0.998965
bcr	0.0134352	0.998965
bcsA	-0.0447003	0.998965
bcsB	-0.0527237	0.998965
bcsC	-0.0353824	0.998965
bcsE	0.0170811	0.998965
bcsF	-0.0177604	0.998965
bcsG	0.0290797	0.998965
bcsZ	0.0297189	0.998965
bdm	0.0197185	0.998965
betA	0.00432095	0.998965
betB	-0.0859008	0.998965
betI	0.032513	0.998965
betT	-0.00261383	0.998965
bglA	-0.0323064	0.998965
bglB	-0.04568	0.998965
bglF	-0.00543909	0.998965
bglG	-0.0178437	0.998965
bglH	-0.0240821	0.998965
bglX	-0.033902	0.998965
bioA	-0.0944067	0.998965
bioB	0.00877738	0.998965
bioC	-0.0170319	0.998965
bioD	-0.0741876	0.998965
bioF	-0.0549664	0.998965
bioH	0.0197823	0.998965
bipA	0.0306225	0.998965
blr	0.061841	0.998965
bolA	0.0104456	0.998965
brnQ	-0.00987072	0.998965
btuB	-0.0191902	0.998965
btuC	-0.059103	0.998965
btuD	0.0712738	0.998965
btuE	0.0495233	0.998965
btuF	0.00218412	0.998965
btuR	0.036691	0.998965
cadA	-0.0279334	0.998965
cadB	0.0129839	0.998965
cadC	0.00574786	0.998965
caiA	0.0152705	0.998965
caiB	-0.0207432	0.998965
caiC	-0.00956991	0.998965
caiD	-0.0227274	0.998965
caiE	0.41566	0.998965
caiF	-0.011407	0.998965
caiT	-0.0318564	0.998965
carA	-0.226334	0.998965
carB	-1.8705	0.998965
cbl	-0.0119709	0.998965
cbpA	-0.0436543	0.998965
cbpM	-0.0224142	0.998965
cbrA	-0.00621303	0.998965
cbrC	0.0514891	0.998965
cchA	0.0253552	0.998965
cchB	-0.0588675	0.998965
ccmA	-0.0368481	0.998965
ccmB	-0.0221295	0.998965
ccmC	-0.0466461	0.998965
ccmD	0.022925	0.998965
ccmE	-0.0478011	0.998965
ccmF	-0.0441399	0.998965
ccmG	-0.0708096	0.998965
ccmH	-0.0318658	0.998965
cdaR	-0.0224359	0.998965
cdh	0.0363697	0.998965
cedA	0.0149986	0.998965
cfa	-0.138979	0.998965
chaA	-0.0385301	0.998965
chaB	-0.065733	0.998965
chbA	0.0614193	0.998965
chbC	0.0438524	0.998965
chbF	0.0159706	0.998965
chbG	-0.057236	0.998965
chbR	0.0690295	0.998965
cheA	-0.0771856	0.998965
cheB	-0.00113407	0.998965
cheR	-0.0171676	0.998965
cheW	-0.004826	0.998965
cheY	-0.0247732	0.998965
cheZ	0.0414118	0.998965
chiA	0.0398606	0.998965
chpB	-0.0109879	0.998965
chpR	0.022549	0.998965
chpS	0.178582	0.998965
cirA	-0.0095635	0.998965
citA	0.0241893	0.998965
citB	-0.00624223	0.998965
citC	-0.050285	0.998965
citD	-0.0594844	0.998965
citE	-0.0715701	0.998965
citF	-0.0474604	0.998965
citG	-0.0388415	0.998965
citT	0.0146207	0.998965
citX	-0.0397074	0.998965
clcA	0.0277677	0.998965
clcB	0.01395	0.998965
cld	-0.0066055	0.998965
clpA	-0.000718858	0.998965
clpB	0.00963555	0.998965
clpP	0.240434	0.998965
clpS	-0.0147916	0.998965
clpX	0.242632	0.998965
cls	-0.0553099	0.998965
cmk	-0.43531	0.998965
cmr	0.0161745	0.998965
cmtA	-0.00402486	0.998965
cmtB	0.0399349	0.998965
coaE	NA	NA
cobB	0.0403704	0.998965
cobC	-0.0255547	0.998965
cobS	-0.0369014	0.998965
cobT	-0.0440339	0.998965
cobU	0.0120029	0.998965
codA	-0.00207553	0.998965
codB	-0.0229455	0.998965
cof	-0.0529635	0.998965
copA	0.00496932	0.998965
corA	0.0135103	0.998965
cpdA	0.0427267	0.998965
cpdB	0.0291813	0.998965
cpsB	-0.0229425	0.998965
cpxA	-0.071195	0.998965
cpxP	0.0399876	0.998965
cpxR	0.115194	0.959618
crcA	-0.0528038	0.998965
crcB	0.0174611	0.998965
creA	0.0286077	0.998965
creB	0.0325207	0.998965
creC	0.023302	0.998965
creD	0.00909474	0.998965
crl	0.0115967	0.998965
crp	NA	NA
crr	-0.231745	0.998965
csdA	0.0154271	0.998965
csgA	-0.114933	0.998965
csgB	-0.0534927	0.998965
csgD	-0.0138635	0.998965
csgE	-0.056682	0.998965
csgF	0.0299984	0.998965
csiE	-0.0283826	0.998965
csiR	0.0507591	0.998965
cspA	-0.00920237	0.998965
cspB	0.2081	0.998965
cspC	-0.0723656	0.998965
cspD	-0.00231384	0.998965
cspE	-0.0501874	0.998965
cspF	0.130684	0.998965
cspG	-0.0685525	0.998965
cspH	-0.0518182	0.998965
cspI	-0.0442326	0.998965
cstA	-0.0244794	0.998965
cueO	-0.0150584	0.998965
cueR	-0.0354218	0.998965
cusA	0.0129541	0.998965
cusB	0.00809125	0.998965
cusC	0.0868605	0.998965
cusR	-0.0719845	0.998965
cusS	0.0292693	0.998965
cutA	-0.00776184	0.998965
cutC	0.0254358	0.998965
cvpA	0.0619508	0.998965
cvrA	-0.0526355	0.998965
cyaA	0.0974841	0.998965
cyaY	-0.0160841	0.998965
cybB	-0.0453927	0.998965
cybC	0.0445037	0.998965
cycA	0.0310028	0.998965
cynR	0.0250713	0.998965
cynS	-0.0416416	0.998965
cynT	-0.0493741	0.998965
cynX	-0.046199	0.998965
cyoA	-0.029209	0.998965
cyoB	-0.0333105	0.998965
cyoC	-0.0105692	0.998965
cyoD	0.00971449	0.998965
cyoE	0.03763	0.998965
cysA	-0.0781785	0.998965
cysB	-0.859869	0.998965
cysC	-0.150897	0.998965
cysD	-0.0901328	0.998965
cysE	-1.19724	0.998965
cysG	-0.11185	0.998965
cysH	-0.128643	0.998965
cysI	-0.243433	0.528805
cysJ	-0.187188	0.923966
cysK	-0.178168	0.998965
cysN	-0.0607819	0.998965
cysP	-0.017026	0.998965
cysQ	0.00146011	0.999364
cysU	-0.0592844	0.998965
cysW	-0.123006	0.959618
cysZ	-0.0611674	0.998965
cytR	0.0418523	0.998965
dacA	0.0586478	0.998965
dacB	0.0304784	0.998965
dacD	-0.0240312	0.998965
dadA	0.00180756	0.998965
dadX	-0.0281837	0.998965
dam	0.037156	0.998965
damX	0.100444	0.998965
dapF	NA	NA
dbpA	0.0555861	0.998965
dcd	-0.0431394	0.998965
dcm	0.0181957	0.998965
dcp	-0.0679172	0.998965
dcrB	0.0303013	0.998965
dctA	0.00013299	0.999587
dcuA	-0.0311978	0.998965
dcuB	-0.00475251	0.998965
dcuD	0.0103589	0.998965
dcuR	-0.0378189	0.998965
dcuS	-0.0721636	0.998965
ddg	-0.0394674	0.998965
ddlA	0.00419233	0.998965
ddlB	-0.0182539	0.998965
ddpA	-0.077876	0.998965
ddpB	-0.0622192	0.998965
ddpC	0.159445	0.998965
ddpD	0.0605304	0.998965
ddpF	0.0864018	0.998965
ddpX	0.0349546	0.998965
deaD	-0.0251958	0.998965
dedA	0.0110205	0.998965
dedD	0.0515835	0.998965
def	-0.00974629	0.998965
degP	-0.184014	0.998965
degQ	-0.0535079	0.998965
degS	0.533971	0.998965
deoA	0.0282455	0.998965
deoB	0.0641237	0.998965
deoC	0.038848	0.998965
deoD	0.016043	0.998965
deoR	-0.0692086	0.998965
dgkA	-0.161301	0.998965
dgoA	-0.0129893	0.998965
dgoD	0.0194776	0.998965
dgoK	0.00419849	0.998965
dgoR	0.0379226	0.998965
dgoT	0.00186251	0.998965
dgsA	-0.142481	0.998965
dgt	-0.0912016	0.998965
dhaH	-0.0124381	0.998965
dhaK	-0.0305029	0.998965
dhaL	-0.0160182	0.998965
dhaR	-0.0147757	0.998965
dicB	0.0915082	0.998965
dicC	-0.146165	0.998965
dinB	0.0182122	0.998965
dinD	0.00999459	0.998965
dinF	0.035075	0.998965
dinG	0.0448912	0.998965
dinI	0.0796193	0.998965
dinJ	0.0122393	0.998965
dipZ	-0.0241067	0.998965
djlA	-0.0229907	0.998965
djlB	0.0285384	0.998965
djlC	-0.0511689	0.998965
dkgA	-0.0209024	0.998965
dkgB	-0.0305386	0.998965
dksA	-0.306082	0.998965
dld	0.0385147	0.998965
dmsA	-0.0247132	0.998965
dmsB	-0.0309108	0.998965
dmsC	-0.043756	0.998965
dmsD	0.100362	0.998965
dnaB	-0.0527027	0.998965
dnaJ	-0.107906	0.998965
dnaK	NA	NA
dnaQ	2.85965	0.998965
dos	-0.0224138	0.998965
dppA	-0.00495974	0.998965
dppB	0.0117659	0.998965
dppC	-0.0189465	0.998965
dppD	0.0355126	0.998965
dppF	0.0215925	0.998965
dps	0.091167	0.998965
dsbB	-0.107799	0.998965
dsbC	0.0187559	0.998965
dsbG	-0.00155997	0.998965
dsdA	-0.0343082	0.998965
dsdC	-0.00122912	0.998965
dsdX	-0.0380211	0.998965
dsrB	-0.0294298	0.998965
dtd	-0.00513365	0.998965
dusB	0.0163066	0.998965
dusC	0.219354	0.998965
eaeH	0.0929648	0.998965
eamA	-0.0277052	0.998965
ebgA	0.0445158	0.998965
ebgC	-0.000549364	0.998965
ebgR	-0.0306325	0.998965
eco	0.017543	0.998965
ecpD	0.0710445	0.998965
eda	0.00692516	0.998965
edd	-0.0174899	0.998965
ego	0.0990353	0.998965
elaA	0.0421434	0.998965
elaB	-0.0424125	0.998965
elaC	0.0220326	0.998965
elaD	0.0116982	0.998965
elbA	-0.0484185	0.998965
elbB	NA	NA
emrA	0.0323763	0.998965
emrB	0.0140918	0.998965
emrD	0.00755514	0.998965
emrE	-0.0754877	0.998965
emrK	0.116217	0.998965
emrY	0.00475006	0.998965
emtA	-0.0354912	0.998965
endA	0.0651765	0.998965
entA	-0.0275338	0.998965
entB	0.0357858	0.998965
entC	-0.037968	0.998965
entD	-0.0222025	0.998965
entE	-0.0268474	0.998965
entF	0.0596259	0.998965
envC	0.0692808	0.998965
envR	-0.0500968	0.998965
envY	-0.0207607	0.998965
envZ	0.0560935	0.998965
epd	-0.0440673	0.998965
eptA	-0.013874	0.998965
eptB	-0.00430862	0.998965
erfK	-0.16502	0.959618
essD	-0.0508803	0.998965
etp	0.0627309	0.998965
eutA	0.00102923	0.998965
eutB	-0.00382683	0.998965
eutC	-0.0102361	0.998965
eutE	-0.0148362	0.998965
eutG	-0.0157883	0.998965
eutH	0.00594513	0.998965
eutI	-0.0363952	0.998965
eutJ	-0.0148028	0.998965
eutL	0.0220403	0.998965
eutP	-0.0278099	0.998965
eutQ	-0.0126475	0.998965
eutT	0.00933525	0.998965
evgA	-0.0973663	0.998965
evgS	0.0582526	0.998965
exbB	0.0395358	0.998965
exbD	0.0477713	0.998965
exo	0.00589281	0.998965
exoX	0.00315884	0.998965
exuR	0.0107597	0.998965
exuT	0.0316665	0.998965
fabF	-0.0829276	0.998965
fabH	0.734043	0.998965
fabR	0.0228175	0.998965
fadA	-0.00808817	0.998965
fadB	0.00238637	0.998965
fadD	-0.011621	0.998965
fadE	-0.0267543	0.998965
fadH	-0.0914266	0.998965
fadL	0.00665726	0.998965
fadR	-0.0480648	0.998965
fbaB	0.0182753	0.998965
fbp	0.0224193	0.998965
fcl	-0.0179923	0.998965
fdhD	-0.0340059	0.998965
fdhE	0.00256034	0.998965
fdhF	0.0269839	0.998965
fdnG	0.0504943	0.998965
fdnH	0.05315	0.998965
fdnI	0.0448568	0.998965
fdoG	0.00224713	0.998965
fdoI	-0.00632498	0.998965
fdrA	-0.0422836	0.998965
fdx	-0.195566	0.998965
feaB	0.00280495	0.998965
feaR	-0.0205436	0.998965
fecA	-0.0496794	0.998965
fecB	-0.0114431	0.998965
fecC	-0.0332326	0.998965
fecD	-0.0134489	0.998965
fecE	-0.0123368	0.998965
fecI	-0.0266698	0.998965
fecR	0.00595347	0.998965
feoA	0.070675	0.998965
feoB	-0.050393	0.998965
fepA	0.0218306	0.998965
fepB	NA	NA
fepD	NA	NA
fepE	-0.0827482	0.998965
fepG	-0.0803602	0.998965
fhiA	0.0272376	0.998965
fhlA	0.0180111	0.998965
fhuA	0.00873879	0.998965
fhuB	-0.0551948	0.998965
fhuC	0.024938	0.998965
fhuD	-0.000483267	0.998965
fhuE	-0.0335851	0.998965
fhuF	0.0234079	0.998965
fic	-0.0155373	0.998965
fieF	-0.00062425	0.998965
fimA	0.00727114	0.998965
fimB	-0.0113549	0.998965
fimC	0.0339098	0.998965
fimE	0.0596723	0.998965
fimF	0.0200053	0.998965
fimG	-0.037724	0.998965
fimH	-0.100044	0.998965
fimI	-0.017148	0.998965
fimZ	-0.0280261	0.998965
fis	-0.0900383	0.998965
fiu	-0.044235	0.998965
fixA	-0.014198	0.998965
fixB	-0.0311258	0.998965
fixC	0.00997529	0.998965
fixX	-0.0363348	0.998965
fklB	0.00295966	0.998965
fkpA	0.0370005	0.998965
fkpB	0.071506	0.998965
fldB	-0.0134988	0.998965
flgB	-0.0698138	0.998965
flgC	-0.0268154	0.998965
flgD	-0.0138424	0.998965
flgE	0.0212753	0.998965
flgF	0.0295283	0.998965
flgG	0.0252399	0.998965
flgH	0.0289714	0.998965
flgI	-0.0708171	0.998965
flgJ	-0.000525723	0.999234
flgK	-0.118687	0.998965
flgL	-0.0442993	0.998965
flgN	-0.0303994	0.998965
flhA	0.0337333	0.998965
flhB	0.108768	0.998965
flhE	-0.0260054	0.998965
fliA	0.0196522	0.998965
fliC	0.02608	0.998965
fliD	0.165358	0.998965
fliE	0.00803305	0.998965
fliF	-0.0236331	0.998965
fliG	0.0374487	0.998965
fliH	-0.0436701	0.998965
fliI	-0.0487925	0.998965
fliJ	-0.0361563	0.998965
fliK	0.0420385	0.998965
fliL	0.126483	0.998965
fliM	-0.0331914	0.998965
fliN	0.031879	0.998965
fliO	0.0431031	0.998965
fliP	-0.0216435	0.998965
fliQ	0.0307091	0.998965
fliR	0.120876	0.998965
fliS	0.0481614	0.998965
fliT	0.0183219	0.998965
fliY	-0.0252894	0.998965
fliZ	0.0174886	0.998965
flk	0.041038	0.998965
flu	-0.0687327	0.998965
flxA	-0.0472884	0.998965
fnr	-0.0124996	0.998965
focA	-0.205853	0.118833
focB	0.0217753	0.998965
folA	NA	NA
folB	NA	NA
folC	NA	NA
folE	NA	NA
folK	NA	NA
folM	-0.0878904	0.998965
folX	-0.0133175	0.998965
fpr	0.0588951	0.998965
frc	-0.120644	0.998965
frdA	-0.0226817	0.998965
fre	-0.0048106	0.998965
frlA	-0.0464535	0.998965
frlB	0.0087345	0.998965
frlC	0.0300492	0.998965
frlD	-0.016245	0.998965
frlR	0.0660024	0.998965
frmA	-0.0129495	0.998965
frmB	0.0153148	0.998965
frmR	0.0366303	0.998965
frsA	-0.200344	0.998965
fruA	0.0600975	0.998965
fruB	0.0211558	0.998965
fruK	0.00197206	0.998965
fruR	-0.115351	0.998965
frvA	0.0167481	0.998965
frvB	-0.0278488	0.998965
frvX	0.0128212	0.998965
frwB	-0.0178678	0.998965
frwC	0.0318225	0.998965
frwD	-0.00232053	0.998965
fsaA	0.0416658	0.998965
fsaB	0.0207327	0.998965
fsr	-0.00318057	0.998965
ftn	-0.120789	0.998965
ftsB	-0.191136	0.998965
ftsE	-0.211755	0.998965
ftsN	0.233712	0.998965
ftsX	0.179852	0.998965
fucA	0.040236	0.998965
fucI	-0.043574	0.998965
fucK	0.0144966	0.998965
fucO	0.0300617	0.998965
fucP	-0.028363	0.998965
fucR	0.00243583	0.998965
fucU	-0.0037573	0.998965
fumA	0.0547618	0.998965
fumB	-0.0180316	0.998965
fumC	-0.0105238	0.998965
fur	-0.296629	0.998965
fxsA	0.0493893	0.998965
gabD	0.0294392	0.998965
gabP	0.0325225	0.998965
gabT	0.00544123	0.998965
gadC	0.0274059	0.998965
gadE	-0.00155432	0.998965
gadW	0.0482803	0.998965
gadX	0.0477946	0.998965
galE	0.00960134	0.998965
galF	0.0171548	0.998965
galK	-0.0588564	0.998965
galM	-0.0417144	0.998965
galR	-0.0179925	0.998965
galS	0.00579513	0.998965
galT	-0.0521223	0.998965
galU	0.533972	0.998965
gapA	0.0900833	0.998965
garD	0.023256	0.998965
garK	0.0578345	0.998965
garL	-0.0206918	0.998965
garP	0.0176981	0.998965
garR	-0.0146333	0.998965
gatC	0.0205171	0.998965
gatD	0.00597937	0.998965
gatY	-0.0384057	0.998965
gatZ	0.0108741	0.998965
gcd	0.0147293	0.998965
gcl	-0.000226788	0.999364
gcvA	-0.0516744	0.998965
gcvH	-0.10912	0.998965
gcvP	-0.106206	0.998965
gcvR	-0.0464712	0.998965
gcvT	0.0239537	0.998965
gdhA	0.0196268	0.998965
ggt	0.0414657	0.998965
gidA	0.262025	0.998965
gidB	0.0446637	0.998965
glcB	0.0519934	0.998965
glcC	-0.0113673	0.998965
glcD	0.0570144	0.998965
glcE	0.0315293	0.998965
glcF	0.00481958	0.998965
glcG	0.00502509	0.998965
gldA	0.00299453	0.998965
glf	0.0745102	0.998965
glgA	-0.00996798	0.998965
glgB	-0.0245223	0.998965
glgC	-0.0148381	0.998965
glgP	0.00634553	0.998965
glgS	-0.0921168	0.998965
glgX	0.0103514	0.998965
glk	0.0679409	0.998965
glmM	0.403678	0.998965
glnB	0.0520195	0.998965
glnD	-0.0970142	0.998965
glnE	-0.0240827	0.998965
glnG	0.0740509	0.998965
glnH	0.130618	0.998965
glnK	-0.0671642	0.998965
glnL	-0.0679322	0.998965
glnP	0.058693	0.998965
glnQ	0.035944	0.998965
gloA	0.103447	0.998965
gloB	-0.0449061	0.998965
glpA	0.00456531	0.998965
glpB	0.0697881	0.998965
glpC	0.00935528	0.998965
glpD	0.0543209	0.998965
glpE	0.0248706	0.998965
glpF	0.0230203	0.998965
glpG	0.0224608	0.998965
glpK	0.0113187	0.998965
glpQ	0.0208815	0.998965
glpR	0.064584	0.998965
glpT	-0.0349454	0.998965
glpX	0.0322273	0.998965
gltA	-0.0114601	0.998965
gltD	-0.044462	0.998965
gltF	-0.0103051	0.998965
gltI	0.00918528	0.998965
gltJ	0.0260826	0.998965
gltK	-0.0851116	0.998965
gltL	-0.0102477	0.998965
gltP	0.0381067	0.998965
gltS	0.00736873	0.998965
glvB	-0.00476772	0.998965
glvC	-0.0246513	0.998965
glvG	0.00715438	0.998965
glxK	0.0584776	0.998965
glxR	-0.0120701	0.998965
glyA	-0.62017	0.998965
gmd	-0.0437146	0.998965
gmhB	1.10298	0.998965
gmr	0.00168344	0.998965
gnd	0.0478953	0.998965
gnsA	NA	NA
gntK	0.0302791	0.998965
gntP	0.00525404	0.998965
gntR	0.065834	0.998965
gntT	0.00953679	0.998965
gntU	0.00426354	0.998965
gntX	0.0272926	0.998965
gntY	-0.108853	0.998965
gor	0.0514309	0.998965
gph	0.011811	0.998965
gpmA	-0.107618	0.998965
gpp	0.038515	0.998965
gpt	0.0352836	0.998965
greA	-0.0348206	0.998965
greB	0.0294008	0.998965
groL	NA	NA
grxA	0.0129289	0.998965
grxB	-0.00867089	0.998965
grxC	0.0307802	0.998965
gshA	0.0185746	0.998965
gshB	0.034353	0.998965
gsk	0.0403609	0.998965
gspA	0.00218994	0.998965
gspC	0.054342	0.998965
gspD	-0.074303	0.998965
gspE	-0.0103802	0.998965
gspG	-0.0489586	0.998965
gspH	0.0238911	0.998965
gss	0.0111562	0.998965
gst	0.034484	0.998965
guaA	NA	NA
guaB	NA	NA
guaC	-0.035149	0.998965
guaD	-0.0152811	0.998965
gudD	-0.00623502	0.998965
gudP	0.00372675	0.998965
gudX	0.00843769	0.998965
gutM	0.0258485	0.998965
gutQ	0.0897969	0.998965
hcaB	-0.0218874	0.998965
hcaC	0.0106071	0.998965
hcaD	0.00789233	0.998965
hcaE	0.0566507	0.998965
hcaF	0.00484995	0.998965
hcaR	-0.00696439	0.998965
hcaT	0.0146833	0.998965
hchA	-0.0105396	0.998965
hcp	0.0146992	0.998965
hcr	-0.0569324	0.998965
hda	-1.59739	0.998965
hdeA	0.030716	0.998965
hdeB	-0.00392202	0.998965
hdeD	0.0293201	0.998965
hdfR	-0.165706	0.706685
hdhA	-0.0924204	0.998965
helD	-0.0242382	0.998965
hemF	-0.00539884	0.998965
hemG	-0.385014	0.998965
hemN	0.0235125	0.998965
hemX	0.00182242	0.998965
hemY	-0.0173482	0.998965
hepA	-0.0804786	0.706685
hflC	0.0755146	0.998965
hflD	0.00137405	0.998965
hflK	0.0806477	0.998965
hflX	-0.00100117	0.998965
hfq	0.653317	0.998965
hha	0.0328539	0.998965
hinT	0.0418226	0.998965
hipA	-0.0396002	0.998965
hipB	-0.18463	0.998965
hisA	0.0262072	0.998965
hisB	0.0550078	0.998965
hisC	-0.0772233	0.998965
hisD	-0.0202794	0.998965
hisF	-0.00561806	0.998965
hisH	0.0607331	0.998965
hisI	-0.0370633	0.998965
hisJ	0.087639	0.998965
hisL	0.0328974	0.998965
hisM	0.037402	0.998965
hisP	-0.00540762	0.998965
hisQ	-0.00399275	0.998965
hlpA	-0.0444082	0.998965
hlyE	0.0167557	0.998965
hmp	-0.0104882	0.998965
hns	-0.802353	0.998965
hofB	-0.0302402	0.998965
hofC	0.0125132	0.998965
hofQ	0.0514634	0.998965
hokA	0.0826328	0.998965
hokB	-0.0152088	0.998965
hokC	-0.00877574	0.998965
hokD	0.0112632	0.998965
hokE	0.0321408	0.998965
holC	0.168619	0.998965
holD	-0.043096	0.998965
holE	-0.124354	0.998965
hpt	-0.0427115	0.998965
hrpA	0.113616	0.998965
hrpB	-0.0388632	0.998965
hscA	-0.051733	0.998965
hscB	-0.0755801	0.998965
hscC	-0.0266008	0.998965
hsdM	-0.00369364	0.998965
hsdR	0.0897932	0.998965
hsdS	0.0322458	0.998965
hslJ	0.0277222	0.998965
hslO	0.0208303	0.998965
hslR	0.0338173	0.998965
hslU	0.0178945	0.998965
hslV	0.0236788	0.998965
hsrA	-0.0484232	0.998965
htgA	-0.0172943	0.998965
htpG	-0.00516698	0.998965
htpX	-0.024742	0.998965
htrC	-0.0452991	0.998965
htrE	0.0916423	0.998965
htrG	0.0745352	0.998965
hupA	-0.0644121	0.998965
hupB	-0.0998588	0.998965
hyaA	-0.0547926	0.998965
hyaB	-0.0228323	0.998965
hyaC	-0.0756866	0.998965
hyaD	0.0427093	0.998965
hyaE	-0.0611761	0.998965
hyaF	0.091406	0.998965
hybA	-0.0396998	0.998965
hybB	-0.00456325	0.998965
hybC	-0.00909548	0.998965
hybD	0.0308078	0.998965
hybE	0.0521732	0.998965
hybF	-0.00493647	0.998965
hybG	0.0108223	0.998965
hybO	0.00181007	0.998965
hycA	0.0515252	0.998965
hycB	0.0193854	0.998965
hycC	-0.0497172	0.998965
hycD	-0.0781919	0.998965
hycE	-0.0655053	0.998965
hycF	-0.0170672	0.998965
hycG	0.0268635	0.998965
hycH	-0.0332563	0.998965
hycI	-0.0290024	0.998965
hydN	0.0237462	0.998965
hyfA	-0.023966	0.998965
hyfB	-0.00152045	0.998965
hyfC	-0.00823195	0.998965
hyfD	-0.0333901	0.998965
hyfE	0.00505383	0.998965
hyfF	0.0100358	0.998965
hyfG	-0.00555976	0.998965
hyfH	0.0192301	0.998965
hyfI	-0.000759861	0.999234
hyfJ	0.00133243	0.998965
hyfR	0.0521183	0.998965
hyi	-0.0559034	0.998965
hypA	-0.0168532	0.998965
hypB	-0.00758203	0.998965
hypC	0.0464837	0.998965
hypD	-0.05798	0.998965
hypE	-0.0170003	0.998965
hypF	0.00236037	0.998965
hyuA	0.0121717	0.998965
iaaA	0.111574	0.998965
iadA	-0.0632869	0.998965
iap	0.0135746	0.998965
ibpA	0.0365112	0.998965
ibpB	0.03625	0.998965
icd	0.240196	0.998965
icdC	-0.0314949	0.998965
iclR	0.0240589	0.998965
idi	-0.0170858	0.998965
idnD	-0.0651229	0.998965
idnK	-0.0658065	0.998965
idnO	0.00903105	0.998965
idnR	-0.0545548	0.998965
idnT	-0.0299087	0.998965
ihfA	0.533971	0.998965
ihfB	-0.620167	0.998965
ileS	NA	NA
ilvA	-0.0712533	0.998965
ilvB	-0.0238004	0.998965
ilvD	-0.0181382	0.998965
ilvE	0.0198266	0.998965
ilvH	0.0019378	0.998965
ilvI	-0.0321085	0.998965
ilvL	-0.0228545	0.998965
ilvM	-0.0296445	0.998965
ilvN	-0.021134	0.998965
ilvY	0.0061989	0.998965
inaA	0.0391724	0.998965
intA	0.0563483	0.998965
intB	-0.00513099	0.998965
intD	-0.0266839	0.998965
intE	-0.0238449	0.998965
intF	0.213048	0.998965
intQ	0.0225338	0.998965
intR	0.0197529	0.998965
intS	0.0262593	0.998965
iscA	0.0796684	0.998965
iscR	0.0412651	0.998965
iscS	NA	NA
iscU	-0.0692485	0.998965
ispA	NA	NA
ispU	NA	NA
ivbL	0.00356166	0.998965
ivy	0.0459454	0.998965
katE	-0.111409	0.998965
katG	-0.0178842	0.998965
kbaY	0.0212352	0.998965
kbaZ	0.0254269	0.998965
kbl	-0.0361343	0.998965
kch	-0.00591873	0.998965
kdgK	-0.00512634	0.998965
kdgR	-0.00632063	0.998965
kdgT	0.0263567	0.998965
kdpA	0.0130787	0.998965
kdpB	0.0265075	0.998965
kdpC	-0.0160693	0.998965
kdpD	0.0954203	0.998965
kdpE	-0.0844165	0.998965
kdpF	0.00417431	0.998965
kdsC	0.0151623	0.998965
kdsD	0.000930665	0.998965
kduD	-0.00231956	0.998965
kduI	0.0115672	0.998965
kefB	-0.0420714	0.998965
kefC	-0.0028319	0.998965
kefF	-0.0543995	0.998965
kefG	-0.00071313	0.998965
kgtP	-0.0109132	0.998965
kil	0.656087	0.998965
kptA	-0.0600766	0.998965
ksgA	-0.0284044	0.998965
lacA	-0.0103331	0.998965
lar	-0.0892288	0.998965
ldcA	0.423945	0.998965
ldcC	-0.0197615	0.998965
ldhA	0.127063	0.998965
lepA	0.186983	0.998965
leuA	-0.056798	0.998965
leuB	0.0474918	0.998965
leuC	0.00937529	0.998965
leuD	-0.0374568	0.998965
leuL	0.0177975	0.998965
leuO	-0.000459874	0.998965
lhr	-0.0813452	0.998965
ligB	0.00870159	0.998965
ligT	-0.0568176	0.998965
lipA	1.54272	0.998965
lipB	-0.126143	0.998965
lit	-0.0711042	0.998965
livF	-0.0132423	0.998965
livG	-0.0139747	0.998965
livH	0.0235676	0.998965
livJ	-0.00868599	0.998965
livK	-0.0992844	0.998965
livM	0.0164916	0.998965
lldD	0.0573442	0.998965
lldP	0.0512084	0.998965
lldR	0.0375741	0.998965
lon	-0.0873303	0.998965
lpcA	NA	NA
lpd	NA	NA
lplA	0.0127175	0.998965
lpp	-0.160902	0.998965
lpxA	-0.0347392	0.998965
lrp	-0.0752279	0.998965
lsrB	0.0465279	0.998965
lsrC	0.00591965	0.998965
lsrD	0.104377	0.998965
lsrF	-0.0177605	0.998965
lsrG	0.0917468	0.998965
ltaE	-0.0318309	0.998965
luxS	-0.0634712	0.998965
lysA	0.0539759	0.998965
lysC	0.055064	0.998965
lysP	0.039917	0.998965
lysR	-0.024062	0.998965
lysS	-0.0694113	0.998965
lysU	0.0282381	0.998965
lyxK	0.0306786	0.998965
maa	-0.00475994	0.998965
macA	0.0757799	0.998965
macB	-0.0080993	0.998965
maeB	0.0214688	0.998965
mak	-0.00613607	0.998965
malE	0.0331274	0.998965
malG	0.0266683	0.998965
malI	-0.0142449	0.998965
malK	0.0475439	0.998965
malM	0.0334783	0.998965
malP	-0.013528	0.998965
malQ	0.0274158	0.998965
malS	-0.0179783	0.998965
malT	0.0453725	0.998965
malX	-0.0241706	0.998965
malY	-0.092747	0.998965
malZ	-0.00979094	0.998965
manA	0.0497267	0.998965
manX	0.0479242	0.998965
manY	0.00792552	0.998965
manZ	-0.0505794	0.998965
maoC	-0.00383899	0.998965
marA	-0.0389733	0.998965
marC	-0.187414	0.998965
marR	0.0100891	0.998965
mazG	0.0539664	0.998965
mbhA	0.042447	0.998965
mcrA	-0.0437124	0.998965
mcrB	-0.0441994	0.998965
mcrC	0.0309524	0.998965
mdaB	-0.0112652	0.998965
mdh	0.0334807	0.998965
mdlA	0.0136006	0.998965
mdlB	-0.0315972	0.998965
mdoB	-0.0010053	0.998965
mdoC	-0.0443238	0.998965
mdoD	-0.0539081	0.998965
mdoG	-0.00684858	0.998965
mdoH	0.0127105	0.998965
mdtA	-0.0219597	0.998965
mdtB	0.0135505	0.998965
mdtC	-0.00779393	0.998965
mdtD	-0.0952522	0.998965
mdtE	-0.0202195	0.998965
mdtF	0.00810904	0.998965
mdtG	0.0223613	0.998965
mdtH	0.0469087	0.998965
mdtI	0.0615043	0.998965
mdtJ	-0.0519164	0.998965
mdtK	-0.00862529	0.998965
melA	0.0582605	0.998965
melB	0.0489065	0.998965
melR	0.062376	0.998965
menA	-0.00400381	0.998965
menB	-0.0274521	0.998965
menD	0.00928442	0.998965
menE	0.0423465	0.998965
menF	0.0267886	0.998965
mepA	0.050828	0.998965
metA	-0.0108914	0.998965
metB	0.0535811	0.998965
metC	0.0151479	0.998965
metE	0.0246103	0.998965
metF	-0.0973206	0.998965
metH	0.027171	0.998965
metI	-0.00710505	0.998965
metJ	0.206613	0.998965
metL	0.199112	0.998965
metN	0.00644476	0.998965
metQ	NA	NA
metR	0.0132657	0.998965
mfd	-0.0440116	0.998965
mglA	-0.0206071	0.998965
mglB	-0.114839	0.998965
mglC	0.0299225	0.998965
mgsA	-0.0456471	0.998965
mgtA	-0.0564541	0.998965
mhpA	-0.0122933	0.998965
mhpB	-0.0245003	0.998965
mhpC	-0.0831276	0.998965
mhpD	-0.0255843	0.998965
mhpE	0.00491287	0.998965
mhpF	0.0194277	0.998965
mhpR	-0.01766	0.998965
mhpT	0.0173663	0.998965
miaA	-0.346162	0.998965
miaB	-0.0230833	0.998965
minC	0.0698816	0.998965
minD	0.0849251	0.998965
minE	0.0281206	0.998965
mioC	0.00798026	0.998965
mipA	0.0168433	0.998965
mlrA	-0.0443165	0.998965
mltB	-0.00272804	0.998965
mltC	-0.000178532	0.999587
mltD	0.0208687	0.998965
mmuM	0.337731	0.998965
mmuP	0.213538	0.998965
mngA	0.0343216	0.998965
mngB	-0.0130537	0.998965
mngR	0.00232807	0.998965
mntH	-0.0118911	0.998965
mntR	-0.0118679	0.998965
moaA	0.0189431	0.998965
moaB	-0.0709094	0.998965
moaC	-0.0445761	0.998965
moaD	0.0339344	0.998965
moaE	0.020728	0.998965
mobB	0.0163515	0.998965
modA	-0.00949977	0.998965
modB	-0.0494562	0.998965
modC	-0.0133336	0.998965
modE	-0.00297502	0.998965
modF	0.0439178	0.998965
moeA	0.0241947	0.998965
moeB	0.00205916	0.998965
mog	0.033205	0.998965
motA	-0.0565771	0.998965
motB	0.0123916	0.998965
mpaA	0.0882822	0.998965
mpl	0.0430543	0.998965
mppA	0.0936282	0.998965
mprA	-0.0321568	0.998965
mqo	-0.0337998	0.998965
mraW	-0.0789489	0.998965
mraZ	-0.0338863	0.998965
mrcA	-0.0156382	0.998965
mrcB	-0.05437	0.998965
mreD	NA	NA
mrp	-0.0207659	0.998965
mrr	-0.00328804	0.998965
mscL	-0.0196442	0.998965
msrA	0.00987534	0.998965
msyB	-0.0385764	0.998965
mtgA	0.00302521	0.998965
mtlA	0.0243366	0.998965
mtlD	-0.0341449	0.998965
mtlR	-0.0337726	0.998965
mtr	-0.00904547	0.998965
murP	-0.0196663	0.998965
mutH	-0.340817	0.998965
mutL	NA	NA
mutM	0.0132265	0.998965
mutS	NA	NA
mutT	NA	NA
mutY	0.030542	0.998965
mviM	-0.0399834	0.998965
nac	-0.0130876	0.998965
nadA	-0.203423	0.998965
nadB	-0.244319	0.517909
nadC	-0.251372	0.998965
nadR	0.0714965	0.998965
nagA	0.18435	0.998965
nagB	-0.0202927	0.998965
nagC	-0.0414137	0.998965
nagD	-0.0612798	0.998965
nagE	-0.0106387	0.998965
nagZ	-0.0774911	0.998965
nanA	0.0011687	0.998965
nanE	0.0648223	0.998965
nanR	-0.0530525	0.998965
nanT	0.00337208	0.998965
napA	0.00563642	0.998965
napB	0.000146293	0.999587
napC	-0.02425	0.998965
napD	-0.0454451	0.998965
napF	0.0314231	0.998965
napG	-0.0549167	0.998965
napH	-0.00277826	0.998965
narG	0.0493157	0.998965
narH	-0.0265788	0.998965
narJ	0.0369323	0.998965
narK	0.0798581	0.998965
narL	-0.0592313	0.998965
narQ	0.0623224	0.998965
narU	-0.0242378	0.998965
narV	0.0381972	0.998965
narW	-0.128893	0.998965
narX	-0.00129453	0.998965
narY	0.0379455	0.998965
narZ	0.0351704	0.998965
ndh	-0.146514	0.998965
ndk	-0.135004	0.998965
nemA	0.144727	0.998965
nfi	-0.0538329	0.998965
nfo	0.0185556	0.998965
nfrA	0.0584303	0.998965
nfrB	-0.0137572	0.998965
nfsA	-0.0150331	0.998965
nhaA	0.0302642	0.998965
nhaB	-0.0350253	0.998965
nhaR	-0.00725025	0.998965
nhoA	-0.0362857	0.998965
nikA	0.00479897	0.998965
nikB	-0.0554985	0.998965
nikC	-0.00354491	0.998965
nikD	-0.0132498	0.998965
nikE	-0.0089086	0.998965
nikR	-0.030584	0.998965
ninE	-0.0845626	0.998965
nirB	0.0141935	0.998965
nirC	0.0202375	0.998965
nirD	0.0487587	0.998965
nlpA	-0.0244904	0.998965
nlpB	-0.0109792	0.998965
nlpC	0.0463034	0.998965
nlpD	-0.138865	0.959618
nlpE	0.0393087	0.998965
nlpI	0.161057	0.998965
nmpC	-0.0110119	0.998965
norR	-0.0247943	0.998965
norV	-0.0468319	0.998965
norW	-0.0395006	0.998965
npr	-0.0246731	0.998965
nrdD	0.00642368	0.998965
nrdE	0.0318474	0.998965
nrdF	-0.00655717	0.998965
nrdG	-0.00524012	0.998965
nrdH	0.0406581	0.998965
nrdI	0.0429623	0.998965
nrfA	0.0191513	0.998965
nrfB	0.0128747	0.998965
nrfC	0.0191113	0.998965
nrfD	0.0209051	0.998965
nrfE	-0.0204412	0.998965
nrfF	0.0305539	0.998965
nrfG	0.0145131	0.998965
nth	-0.129666	0.998965
nudB	-0.477336	0.998965
nudC	-0.00568363	0.998965
nudD	-0.0098975	0.998965
nudF	-0.00530262	0.998965
nudG	-0.039143	0.998965
nudH	-0.412118	0.998965
nuoA	0.025228	0.998965
nuoB	0.00520485	0.998965
nuoC	0.0648193	0.998965
nuoE	-0.0717625	0.998965
nuoG	-0.0426272	0.998965
nuoH	-0.0121011	0.998965
nuoI	NA	NA
nuoJ	0.0506929	0.998965
nuoM	0.137159	0.998965
nuoN	-0.0604201	0.998965
nupC	-0.0412609	0.998965
nupG	0.0718176	0.998965
nusB	0.277446	0.998965
ogrK	0.0319914	0.998965
ogt	0.0668212	0.998965
ompA	0.249485	0.998965
ompC	-0.0221094	0.998965
ompF	0.00836067	0.998965
ompG	0.0450721	0.998965
ompL	-0.000538606	0.998965
ompN	-0.115037	0.998965
ompR	0.358306	0.998965
ompT	0.0598796	0.998965
ompW	-0.00690439	0.998965
ompX	0.0888171	0.998965
oppB	-0.0230897	0.998965
oppC	-0.0156354	0.998965
oppD	0.0608963	0.998965
oppF	-0.0731905	0.998965
osmB	-0.113829	0.998965
osmC	0.00146791	0.998965
osmE	0.035057	0.998965
osmY	0.0023605	0.998965
otsA	-0.0456857	0.998965
otsB	-0.0571632	0.998965
oxc	-0.0688367	0.998965
oxyR	0.18711	0.998965
paaA	-0.0214621	0.998965
paaB	-0.0330167	0.998965
paaC	-0.0140745	0.998965
paaD	0.000561473	0.998965
paaE	0.0270859	0.998965
paaF	-0.035482	0.998965
paaG	0.0314545	0.998965
paaH	0.0135994	0.998965
paaI	0.00670252	0.998965
paaJ	0.00984266	0.998965
paaK	-0.0182066	0.998965
paaX	-0.0906152	0.998965
paaY	-0.0199135	0.998965
pabA	-0.0288196	0.998965
pabB	0.00164253	0.998965
pabC	0.00758875	0.998965
pal	-0.516387	0.998965
panB	-0.220355	0.118833
panC	-0.135888	0.706685
panD	-0.122417	0.517909
panE	-0.0593348	0.998965
panF	-6.82846e-05	0.999587
pbl	0.0950105	0.998965
pbpC	-0.0362845	0.998965
pbpG	0.0290567	0.998965
pck	0.0242483	0.998965
pcm	-0.0348444	0.998965
pcnB	0.0293272	0.998965
pdhR	0.00430944	0.998965
pdxA	-0.198801	0.998965
pdxB	0.121611	0.998965
pdxJ	0.0017703	0.999234
pdxK	-0.0445862	0.998965
pdxY	-0.215516	0.998965
pepA	-0.0300714	0.998965
pepB	0.060734	0.998965
pepD	0.13231	0.998965
pepE	0.00755765	0.998965
pepN	0.00240687	0.998965
pepP	-0.00765205	0.998965
pepQ	-0.0130015	0.998965
pepT	-0.0919293	0.998965
perR	NA	NA
pfkA	-0.252923	0.998965
pfkB	0.0400352	0.998965
pflA	-0.147295	0.959618
pflB	-0.143295	0.517909
pflC	0.0050674	0.998965
pflD	0.0139544	0.998965
pfs	-2.1732	0.998965
pgi	-0.328007	0.998965
pgm	-0.171444	0.998965
pgpA	0.0710939	0.998965
pgpB	-0.066676	0.998965
pheA	0.0171574	0.998965
pheL	0.123137	0.998965
pheP	0.0167419	0.998965
phnB	0.0356139	0.998965
phnC	0.0387134	0.998965
phnD	0.0360292	0.998965
phnE	0.0565826	0.998965
phnF	-0.0180049	0.998965
phnG	0.0118626	0.998965
phnH	0.0283499	0.998965
phnI	0.0195339	0.998965
phnJ	0.0179388	0.998965
phnK	0.00120708	0.998965
phnL	0.0301642	0.998965
phnM	0.0723515	0.998965
phnN	0.070473	0.998965
phnO	0.0562173	0.998965
phnP	0.0613298	0.998965
phoA	-0.0826693	0.998965
phoB	0.0481159	0.998965
phoE	0.105664	0.998965
phoH	-0.012164	0.998965
phoP	-0.496968	0.998965
phoQ	NA	NA
phoR	0.0185801	0.998965
phoU	-0.00530323	0.998965
php	0.0437106	0.998965
phr	-0.0316311	0.998965
pin	-0.0331792	0.998965
pinH	0.0286424	0.998965
pinQ	0.118119	0.998965
pioO	0.0240589	0.998965
pitA	-0.0579113	0.998965
pitB	0.00940146	0.998965
pldA	0.0224702	0.998965
pldB	0.0044908	0.998965
plsB	-0.0609513	0.998965
plsX	-0.0200947	0.998965
pmbA	0.0121753	0.998965
pmrD	0.00334485	0.998965
pncA	-0.0654762	0.998965
pncB	0.0507035	0.998965
pnp	-0.0625074	0.998965
pntA	0.070781	0.998965
pntB	-0.0615429	0.998965
pnuC	-0.0157346	0.998965
polA	-0.0315577	0.998965
polB	-0.0478647	0.998965
potA	0.0286005	0.998965
potB	-0.0425733	0.998965
potC	-0.115226	0.998965
potD	-0.0132217	0.998965
potE	-0.0249091	0.998965
potF	-0.025076	0.998965
potG	-0.0247449	0.998965
potH	-0.01012	0.998965
potI	0.022743	0.998965
poxA	-0.0883946	0.998965
poxB	-0.00102482	0.998965
ppc	-0.128614	0.998965
ppdA	-0.0142818	0.998965
ppdB	0.00776536	0.998965
ppdC	-0.0285418	0.998965
ppdD	-0.067184	0.998965
pphA	-0.0552347	0.998965
pphB	0.0586619	0.998965
ppiA	-0.022621	0.998965
ppiB	0.0169539	0.998965
ppiD	-0.068549	0.998965
ppk	-0.413858	0.998965
pppA	-0.0320817	0.998965
pps	-0.0602805	0.998965
ppx	0.0122153	0.998965
pqiA	-0.0630679	0.998965
pqiB	-0.0143567	0.998965
pqqL	0.0922816	0.998965
prc	-0.246167	0.998965
prfC	-0.0909679	0.998965
prfH	0.00812494	0.998965
priA	0.089765	0.998965
priB	NA	NA
priC	0.00705254	0.998965
prkB	0.00199079	0.998965
prlC	-0.0619392	0.998965
prmA	-0.048783	0.998965
prmB	-0.569618	0.998965
prmC	NA	NA
proA	0.117266	0.998965
proB	0.0332627	0.998965
proC	0.0514911	0.998965
proP	-0.0320387	0.998965
proQ	-0.119458	0.998965
proV	0.0403746	0.998965
proW	-0.0164374	0.998965
proX	0.0391913	0.998965
proY	-0.0206043	0.998965
prpB	-0.213055	0.998965
prpC	-0.2102	0.998965
prpD	-0.137437	0.959618
prpE	-0.142832	0.998965
prpR	-0.0900018	0.998965
psiF	0.0370749	0.998965
pspA	0.0158562	0.998965
pspB	0.0410954	0.998965
pspC	-0.0092015	0.998965
pspD	0.128715	0.998965
pspE	0.0552138	0.998965
pspF	-0.044849	0.998965
pstA	0.333795	0.998965
pstB	-0.0506252	0.998965
pstS	-0.135699	0.998965
pta	-0.336901	0.998965
ptr	0.00400133	0.998965
ptrB	NA	NA
ptsA	-0.0362848	0.998965
ptsG	-0.191396	0.998965
ptsI	-0.842804	0.998965
ptsN	-0.000383188	0.999234
ptsP	0.011281	0.998965
purA	0.444122	0.998965
purB	NA	NA
purC	-0.573487	0.998965
purD	-0.0206773	0.998965
purE	-0.472223	0.998965
purF	-0.302915	0.998965
purH	-0.36808	0.998965
purK	-0.22232	0.998965
purL	-0.0165753	0.998965
purM	-0.755609	0.998965
purN	0.0109121	0.998965
purR	-0.0413659	0.998965
purT	-0.108589	0.998965
purU	-0.106434	0.998965
puuA	-0.0173053	0.998965
puuB	-0.000931557	0.998965
puuC	0.00947593	0.998965
puuD	-0.0183923	0.998965
puuE	0.0194595	0.998965
puuP	0.0581764	0.998965
puuR	0.0561527	0.998965
pykA	0.0603033	0.998965
pykF	0.030863	0.998965
pyrB	-1.13598	0.998965
pyrC	-0.472121	0.998965
pyrD	-0.0496264	0.998965
pyrF	0.677494	0.998965
pyrI	0.0219027	0.998965
pyrL	0.0181346	0.998965
qor	0.0324712	0.998965
qseB	0.0231292	0.998965
qseC	-0.0822907	0.998965
queA	-0.0145983	0.998965
racC	-0.503498	0.998965
radA	0.0174586	0.998965
rarA	0.0539842	0.998965
rarD	0.0178892	0.998965
rbbA	-0.0353994	0.998965
rbfA	-0.450995	0.998965
rbn	-0.0125837	0.998965
rbsA	0.0239056	0.998965
rbsB	-0.00352199	0.998965
rbsC	0.0342764	0.998965
rbsD	0.0242748	0.998965
rbsK	0.0245568	0.998965
rbsR	-0.0454046	0.998965
rcsA	0.0639755	0.998965
rcsD	-0.0358081	0.998965
rcsF	-0.0441776	0.998965
rdgC	0.0444875	0.998965
recA	0.0266798	0.998965
recB	-0.393063	0.998965
recC	-0.40602	0.998965
recD	-0.0074972	0.998965
recE	-0.352878	0.998965
recF	0.0351294	0.998965
recG	0.0614633	0.998965
recJ	-0.0154317	0.998965
recN	0.0172577	0.998965
recO	-0.00773298	0.998965
recQ	0.0232295	0.998965
recR	0.0158253	0.998965
recT	0.0686928	0.998965
recX	0.0374513	0.998965
relA	-0.098832	0.998965
relE	0.00834011	0.998965
rem	0.021104	0.998965
renD	0.00808379	0.998965
rep	0.144542	0.998965
rfaB	-0.0708851	0.998965
rfaC	NA	NA
rfaD	0.785967	0.998965
rfaE	-0.0290727	0.998965
rfaF	-0.203915	0.998965
rfaG	-0.00410514	0.998965
rfaH	0.0498743	0.998965
rfaI	-0.0370376	0.998965
rfaJ	0.00814196	0.998965
rfaK	-0.0233903	0.998965
rfaL	0.00839861	0.998965
rfaQ	0.0401517	0.998965
rfaS	0.0205774	0.998965
rfaY	0.0602366	0.998965
rfaZ	0.091654	0.998965
rfbA	0.0833474	0.998965
rfbB	-0.0173603	0.998965
rfbC	0.026334	0.998965
rfbD	0.0387021	0.998965
rfbX	0.0337412	0.998965
rfe	0.0803583	0.998965
rffA	-0.0802653	0.998965
rffC	0.450073	0.998965
rffD	0.0690068	0.998965
rffE	0.041583	0.998965
rffG	-0.0308055	0.998965
rffH	0.0215057	0.998965
rffM	0.117129	0.706685
rffT	0.072663	0.998965
rhaA	0.0782951	0.998965
rhaB	0.00946668	0.998965
rhaD	-0.00457437	0.998965
rhaR	0.0229614	0.998965
rhaS	0.0287235	0.998965
rhaT	0.00286354	0.998965
rhlB	-0.0295525	0.998965
rhlE	-0.00440953	0.998965
rhoL	-0.00624747	0.998965
rhsD	-0.023024	0.998965
rhsE	0.0166183	0.998965
rhtA	-0.0110463	0.998965
rhtB	-0.0265305	0.998965
rhtC	0.0273289	0.998965
rihA	0.0890285	0.998965
rihB	0.110469	0.998965
rihC	0.0276467	0.998965
rimI	0.0490733	0.998965
rimJ	0.0337202	0.998965
rimK	-0.00216252	0.998965
rimL	-0.105029	0.998965
rimM	NA	NA
rlmB	0.0354697	0.998965
rlpA	-0.0303985	0.998965
rluA	-0.044251	0.998965
rluB	-0.0379769	0.998965
rluC	-0.0478881	0.998965
rluD	-0.00282959	0.998965
rmf	0.0500678	0.998965
rmuC	-0.0224856	0.998965
rna	0.00536337	0.998965
rnb	-0.125166	0.998965
rnc	0.533971	0.998965
rnd	-0.119331	0.998965
rng	0.0143116	0.998965
rnhA	-0.180452	0.998965
rnhB	-0.0366732	0.998965
rnk	-0.040386	0.998965
rnr	NA	NA
rnt	0.435504	0.998965
rob	-0.0245799	0.998965
rof	-0.0928508	0.998965
rpe	0.00348153	0.999587
rph	-0.0305274	0.998965
rpiA	0.104459	0.998965
rpiB	0.0424299	0.998965
rpiR	0.0266853	0.998965
rplD	NA	NA
rplI	-0.182063	0.998965
rplU	-0.0430954	0.998965
rpmA	NA	NA
rpmB	0.606388	0.998965
rpmE	0.128642	0.998965
rpmF	-0.308811	0.998965
rpmH	0.281738	0.998965
rpmI	-0.0288834	0.998965
rpmJ	0.154248	0.998965
rpoD	0.527934	0.998965
rpoS	-0.34961	0.998965
rpoZ	-0.0393803	0.998965
rpsO	0.156478	0.998965
rpsT	0.0497577	0.998965
rpsU	-0.461835	0.998965
rraA	0.0348902	0.998965
rrmA	-0.0598559	0.998965
rrmJ	NA	NA
rsd	0.0195927	0.998965
rseB	0.0291261	0.998965
rseC	-0.00517326	0.998965
rsgA	-0.62017	0.998965
rsmB	-0.0403506	0.998965
rsmC	0.0349641	0.998965
rspA	0.00116949	0.998965
rspB	0.0277681	0.998965
rssA	-0.226277	0.998965
rssB	-0.0975358	0.998965
rstA	0.0223881	0.998965
rstB	0.0274201	0.998965
rsuA	-0.0215271	0.998965
rsxA	-0.117261	0.998965
rsxB	0.242862	0.998965
rsxC	0.0595603	0.998965
rsxD	-0.0832214	0.998965
rsxE	-0.187811	0.998965
rsxG	-0.0134656	0.998965
rtcA	0.0141456	0.998965
rtcB	0.0547662	0.998965
rtcR	0.0136971	0.998965
rtn	-0.0270429	0.998965
rumA	-0.00201534	0.998965
rumB	0.00883431	0.998965
rusA	0.10845	0.998965
ruvA	0.0195907	0.998965
ruvB	0.0531626	0.998965
ruvC	-0.0643431	0.998965
rzoD	-0.0184776	0.998965
rzpD	-0.0292131	0.998965
sanA	0.102373	0.998965
sapA	0.0536593	0.998965
sapB	0.035407	0.998965
sapC	-0.0379071	0.998965
sapD	0.0365994	0.998965
sapF	0.0610133	0.998965
sbcB	-0.00857924	0.998965
sbcC	-0.00900394	0.998965
sbcD	-0.0415695	0.998965
sbmA	0.00231592	0.998965
sbmC	-0.0466765	0.998965
sbp	0.0470696	0.998965
sdaA	0.00837886	0.998965
sdaB	0.0109213	0.998965
sdaC	0.0114266	0.998965
sdhA	NA	NA
sdhB	-0.0274203	0.998965
sdhC	0.00193292	0.998965
sdhD	-0.0194578	0.998965
sdiA	0.0338794	0.998965
secB	0.145254	0.998965
secD	NA	NA
secF	-0.62017	0.998965
secG	-0.221878	0.998965
selA	-0.0193675	0.998965
selB	0.0224769	0.998965
selD	0.0539098	0.998965
seqA	0.00894823	0.998965
serA	-0.203462	0.998965
serB	-0.191628	0.998965
serC	-0.243086	0.998965
setA	-0.0595128	0.998965
setB	-0.0433408	0.998965
setC	0.0407056	0.998965
sfcA	-0.140529	0.998965
sfmA	0.0606957	0.998965
sfmC	-0.128796	0.998965
sfmF	-0.0634983	0.998965
sfmH	0.0156186	0.998965
sfsB	-0.0313936	0.998965
sgbE	0.0107028	0.998965
sgbH	0.0288836	0.998965
sgbU	-0.0365126	0.998965
sgcB	-0.00581073	0.998965
sgcC	-0.0614484	0.998965
sgcE	-0.0235571	0.998965
sgcQ	-0.0528454	0.998965
sgcR	-0.0654387	0.998965
sgcX	-0.0087192	0.998965
sgrR	-0.0324552	0.998965
shiA	-0.0429106	0.998965
sieB	0.0429155	0.998965
sixA	-0.00749759	0.998965
slp	0.00829896	0.998965
slt	0.0454428	0.998965
slyA	0.00864743	0.998965
slyB	-0.022698	0.998965
slyD	-0.0270512	0.998965
slyX	0.0284253	0.998965
smf	-0.00798174	0.998965
smg	-0.0632919	0.998965
smpA	0.052347	0.998965
smpB	-0.269462	0.998965
smtA	0.0499029	0.998965
sodA	0.0630346	0.998965
sodB	-0.0526148	0.998965
sodC	-0.0247121	0.998965
sohA	-0.32583	0.998965
sohB	-0.0936927	0.998965
solA	-0.0355356	0.998965
soxR	0.0561445	0.998965
soxS	-0.00859069	0.998965
speA	0.0202191	0.998965
speB	-0.0109581	0.998965
speC	-0.0477545	0.998965
speD	-0.127666	0.998965
speE	0.0555696	0.998965
speF	0.0352103	0.998965
speG	0.127682	0.998965
sppA	-0.058614	0.998965
spr	0.100152	0.998965
sprT	0.00340065	0.998965
spy	-0.0123835	0.998965
sra	-0.0397297	0.998965
srlA	0.106381	0.998965
srlB	-0.00448839	0.998965
srlD	0.0206238	0.998965
srlE	0.0254127	0.998965
srlR	-0.0604134	0.998965
srmB	-0.196186	0.998965
sseA	-0.0121935	0.998965
sseB	-0.00124313	0.998965
ssnA	0.0498403	0.998965
sspA	-0.251439	0.998965
sspB	-0.0044147	0.998965
sstT	0.0105524	0.998965
ssuB	0.0612876	0.998965
ssuC	0.00145578	0.998965
ssuD	-0.031761	0.998965
ssuE	-0.0356783	0.998965
stfE	-0.071968	0.998965
stfQ	-0.102983	0.998965
stfR	0.0598073	0.998965
sthA	-0.0314562	0.998965
stpA	0.0142539	0.998965
sucB	0.0160476	0.998965
sucC	0.000864287	0.998965
sucD	0.0343601	0.998965
sufA	-0.0358483	0.998965
sufB	-0.0467206	0.998965
sufC	0.00243323	0.998965
sufD	-0.116462	0.998965
sufE	0.0247225	0.998965
sufI	0.108076	0.53283
sufS	0.0332171	0.998965
sulA	0.0317384	0.998965
surA	-0.30015	0.998965
surE	0.0353954	0.998965
syd	-0.0152753	0.998965
tag	-0.00721081	0.998965
talA	0.0123101	0.998965
talB	-0.0126083	0.998965
tam	0.120295	0.998965
tap	0.0198136	0.998965
tar	0.0446745	0.998965
tas	0.0164366	0.998965
tatA	0.0118628	0.998965
tatB	0.0724355	0.998965
tatE	-0.0405572	0.998965
tauA	-0.0246327	0.998965
tauB	0.0364711	0.998965
tauC	-0.0328389	0.998965
tauD	0.0198694	0.998965
tbpA	-0.0293001	0.998965
tdcA	-0.0728471	0.998965
tdcB	-0.0499524	0.998965
tdcC	-0.0384581	0.998965
tdcF	-0.0254838	0.998965
tdcG	0.0187876	0.998965
tdcR	-0.0197004	0.998965
tdh	0.00336369	0.998965
tdk	-0.00839053	0.998965
tehA	-0.0823146	0.998965
tehB	0.157922	0.998965
tesA	-0.0513465	0.998965
tesB	-0.0582419	0.998965
tfaD	-0.0124588	0.998965
tfaE	-0.0667285	0.998965
tfaS	-0.0148772	0.998965
tgt	-0.00274431	0.998965
thiC	0.000922154	0.998965
thiD	-0.0250764	0.998965
thiE	-0.0105303	0.998965
thiF	0.0119412	0.998965
thiG	-0.0183212	0.998965
thiH	-0.00686858	0.998965
thiI	0.0364102	0.998965
thiM	0.0340379	0.998965
thiP	-0.0571855	0.998965
thiQ	-0.0232627	0.998965
thiS	0.00441373	0.998965
thrA	0.0663693	0.998965
thrB	0.0339591	0.998965
thrC	0.0344737	0.998965
thrL	0.104708	0.706685
tiaE	-0.00831537	0.998965
tig	0.0333886	0.998965
tktB	-0.0232842	0.998965
tldD	-0.0323305	0.998965
tolA	0.0845915	0.998965
tolB	0.173685	0.998965
tolC	NA	NA
tolQ	-0.0941022	0.998965
tolR	0.776516	0.998965
tonB	0.029697	0.998965
topB	0.0245745	0.998965
torA	-0.0185632	0.998965
torC	-0.00969434	0.998965
torD	NA	NA
torI	0.0552572	0.998965
torR	-0.0473882	0.998965
torS	-0.000727308	0.998965
torT	-0.0346892	0.998965
torY	-0.0204643	0.998965
torZ	-0.00960534	0.998965
tpiA	NA	NA
tpr	-0.202137	0.998965
treA	-0.0937966	0.998965
treB	-0.00162736	0.998965
treC	-0.0170437	0.998965
treF	0.0304212	0.998965
treR	0.0356344	0.998965
trg	0.0310033	0.998965
trkA	0.00356395	0.998965
trkD	0.015809	0.998965
trkG	0.0138143	0.998965
trkH	0.0925518	0.998965
trmA	-0.0343526	0.998965
trmC	0.00510463	0.998965
trmE	0.449002	0.998965
trmH	0.0648524	0.998965
trmU	0.0729313	0.998965
trpA	-0.299938	0.998965
trpB	-0.334022	0.998965
trpC	-0.211792	0.998965
trpD	-0.334637	0.959618
trpE	-0.404663	0.998965
trpL	-0.0343636	0.998965
trpR	-0.0300288	0.998965
truA	-0.0826028	0.998965
truB	-0.000742803	0.998965
truD	-0.016465	0.998965
trxA	-0.0203308	0.998965
trxB	-0.0938188	0.998965
trxC	0.0237658	0.998965
tsgA	-0.0413342	0.998965
tsr	0.0278499	0.998965
ttdA	0.0502235	0.998965
ttdB	0.0376767	0.998965
tus	0.00245116	0.998965
tynA	0.00345335	0.998965
tyrA	0.0200096	0.998965
tyrB	0.00635149	0.998965
tyrP	-0.0342795	0.998965
tyrR	-0.0454254	0.998965
ubiB	-0.608017	0.998965
ubiC	0.00737658	0.998965
ubiD	0.0265528	0.998965
ubiF	0.241665	0.998965
ubiG	0.0434962	0.998965
ubiH	0.531964	0.998965
ubiX	1.8682	0.998965
ucpA	-0.0164224	0.998965
udk	0.0210369	0.998965
udp	0.0598247	0.998965
ugd	-0.0247418	0.998965
ugpA	-0.0255906	0.998965
ugpB	0.029072	0.998965
ugpC	-0.0387978	0.998965
ugpE	0.0270387	0.998965
ugpQ	0.00334946	0.998965
uhpA	0.0115612	0.998965
uhpB	0.00164192	0.998965
uhpC	-0.0148588	0.998965
uhpT	-0.00942238	0.998965
uidA	-0.0977038	0.998965
uidB	-0.0437339	0.998965
uidC	-0.027213	0.998965
ulaA	0.0139995	0.998965
ulaB	0.0378976	0.998965
ulaC	0.00174095	0.998965
ulaD	-0.00954012	0.998965
ulaE	0.0573132	0.998965
ulaF	-0.000704861	0.998965
ulaG	-0.00457098	0.998965
ulaR	-0.0502432	0.998965
umuC	-0.0521336	0.998965
umuD	-0.040697	0.998965
ung	0.00784491	0.998965
upp	-0.0112022	0.998965
uraA	0.0636629	0.998965
usg	0.0302141	0.998965
ushA	0.00232488	0.998965
uspA	-0.0589436	0.998965
uspE	0.117961	0.998965
uspF	0.0142774	0.998965
uspG	-0.0443756	0.998965
uup	-0.0335866	0.998965
uvrA	-0.0437041	0.998965
uvrB	-0.014528	0.998965
uvrC	-0.0199495	0.998965
uvrD	NA	NA
uvrY	-0.0214306	0.998965
uxaA	0.00380011	0.998965
uxaB	-0.0488865	0.998965
uxaC	-0.00815277	0.998965
uxuA	0.0167628	0.998965
uxuB	-1.82072	0.998965
uxuR	-0.0522046	0.998965
vacJ	-0.0216075	0.998965
visC	0.0925974	0.998965
vsr	0.00584485	0.998965
wbbH	-0.0714321	0.998965
wbbI	0.151809	0.998965
wbbJ	0.152835	0.998965
wbbK	-0.0387745	0.998965
wcaA	-0.0748875	0.998965
wcaB	0.0381369	0.998965
wcaC	0.0111685	0.998965
wcaD	-0.0164059	0.998965
wcaE	-0.0605523	0.998965
wcaF	0.0136985	0.998965
wcaI	0.0503461	0.998965
wcaJ	0.0348185	0.998965
wcaK	-0.0069673	0.998965
wcaL	0.0194977	0.998965
wcaM	NA	NA
wrbA	-0.0456276	0.998965
wza	0.00501024	0.998965
wzb	0.134446	0.998965
wzc	0.034049	0.998965
wzxC	-0.00597616	0.998965
wzxE	0.627867	0.998965
wzzE	0.00116341	0.998965
xapA	-0.0217122	0.998965
xapB	-0.0217042	0.998965
xapR	-0.0144503	0.998965
xdhA	-0.00712717	0.998965
[truncated: 1,681 more rows]

## Sheet: 24h_1_to_1
strain	log2(fold-change)	adjusted p-value
aaeA	0.0554568	0.999784
aaeB	0.0535193	0.999784
aaeR	0.0095768	0.999784
aaeX	0.0248449	0.999784
aas	-0.00231086	0.999784
aat	-0.0638431	0.999784
abgA	-0.121655	0.999784
abgB	0.123613	0.999784
abgR	-0.0233232	0.999784
abgT	-0.000333388	0.999784
abrB	0.0570056	0.999784
aceA	0.0447626	0.999784
aceB	0.0643447	0.999784
aceE	NA	NA
aceF	0.0891946	0.999784
aceK	0.0123641	0.999784
ackA	-0.150042	0.999784
acnA	0.00500587	0.999784
acnB	-0.0566527	0.999784
acpT	-0.00867398	0.999784
acrA	1.77701	0.999784
acrB	-0.381263	0.999784
acrD	-0.00813959	0.999784
acrE	0.00493362	0.999784
acrF	-0.0611221	0.999784
acrR	0.022264	0.999784
acs	0.0108747	0.999784
actP	0.0303731	0.999784
ada	0.0262381	0.999784
add	-0.0252795	0.999784
ade	0.0279783	0.999784
adhE	-0.267263	0.999784
adhP	-0.0338158	0.999784
adiA	-0.0327311	0.999784
adiC	0.0300968	0.999784
adiY	-0.00959249	0.999784
aegA	-0.0123602	0.999784
aer	0.029285	0.999784
aes	0.00555269	0.999784
afuB	0.141056	0.999784
afuC	0.173148	0.999784
agaA	0.0881528	0.999784
agaB	0.0696577	0.999784
agaD	0.0453287	0.999784
agaI	0.0336603	0.999784
agaR	-0.0420912	0.999784
agaS	-0.00152837	0.999784
agaV	-0.00420067	0.999784
agaW	0.0510906	0.999784
agp	-0.00768593	0.999784
ahpF	-0.0177645	0.999784
aidB	0.0257001	0.999784
ais	-0.0106893	0.999784
aldB	0.0495034	0.999784
alkA	0.03666	0.999784
alkB	-0.0186416	0.999784
allA	0.0134692	0.999784
allB	0.0935584	0.999784
allC	0.0226908	0.999784
allD	-0.071757	0.999784
allR	0.0305172	0.999784
alpA	0.0531529	0.999784
alr	0.0519978	0.999784
alsA	0.0223168	0.999784
alsB	0.0569132	0.999784
alsC	0.0161461	0.999784
alsE	0.0256783	0.999784
alx	0.00580627	0.999784
amiA	0.0139082	0.999784
amiB	0.0322419	0.999784
amn	0.0660275	0.999784
ampD	0.00484776	0.999784
ampE	0.0310945	0.999784
ampG	-0.03874	0.999784
ampH	-0.0134415	0.999784
amtB	-0.0146248	0.999784
amyA	-0.0145363	0.999784
ansA	-0.0351709	0.999784
ansB	0.00252455	0.999784
ansP	0.0748206	0.999784
apaG	0.111158	0.999784
apaH	-0.0439238	0.999784
aphA	-0.0418444	0.999784
appA	-0.0276153	0.999784
appB	-0.0601203	0.999784
appC	-0.0409818	0.999784
apt	-0.00805997	0.999784
aqpZ	-0.0764384	0.999784
araA	NA	NA
araB	NA	NA
araC	-0.0118722	0.999784
araE	0.0354628	0.999784
araF	-0.0732754	0.999784
araG	-0.0471498	0.999784
araH	-0.000667443	0.999784
araJ	-0.0183052	0.999784
arcA	-0.143404	0.999784
arcB	-0.116924	0.999784
argA	-0.00516193	0.999784
argB	0.0292881	0.999784
argC	-0.0128966	0.999784
argD	NA	NA
argE	0.0228485	0.999784
argF	0.245558	0.999784
argG	0.0289667	0.999784
argH	0.0592621	0.999784
argO	0.0777193	0.999784
argP	0.0300392	0.999784
argT	-0.0198685	0.999784
arnT	0.00260863	0.999784
aroA	0.00548832	0.999784
aroB	-0.0372729	0.999784
aroC	-0.0795581	0.999784
aroD	0.0806543	0.999784
aroE	NA	NA
aroF	0.0182877	0.999784
aroG	-0.0485838	0.999784
aroH	0.0569776	0.999784
aroL	0.0362884	0.999784
aroM	0.0856312	0.999784
aroP	-0.0295353	0.999784
arpA	0.0600743	0.999784
arsB	0.00192992	0.999784
arsC	0.0444299	0.999784
arsR	0.00322957	0.999784
artI	-0.0112878	0.999784
artJ	0.00157909	0.999784
artM	0.00429674	0.999784
artP	-0.0302109	0.999784
artQ	-0.0723408	0.999784
ascB	0.00671552	0.999784
ascF	-0.00903911	0.999784
ascG	-0.0171295	0.999784
aslA	0.0112697	0.999784
aslB	-0.000515917	0.999784
asmA	0.00950731	0.999784
asnA	0.0285791	0.999784
asnB	0.0166532	0.999784
asnC	-0.0426256	0.999784
aspA	-0.00477704	0.999784
aspC	-0.0214828	0.999784
asr	-0.0481763	0.999784
astA	-0.0184724	0.999784
astB	-0.0830906	0.999784
astC	0.0251833	0.999784
astD	-0.0769721	0.999784
astE	-0.157434	0.999784
atoA	0.0425381	0.999784
atoB	0.0411455	0.999784
atoC	0.0357255	0.999784
atoD	0.0421212	0.999784
atoE	-0.0350961	0.999784
atoS	0.00917343	0.999784
atpA	-0.490366	0.999784
atpB	-0.431634	0.999784
atpC	-0.408677	0.999784
atpE	-0.468306	0.999784
atpF	-0.444618	0.999784
atpG	-0.551131	0.999784
atpI	-0.000490593	0.999784
avtA	0.0367652	0.999784
azoR	0.00670107	0.999784
bacA	0.0352776	0.999784
baeR	-0.0151585	0.999784
baeS	0.0434398	0.999784
barA	-0.0205327	0.999784
basR	0.0331393	0.999784
basS	-0.0200881	0.999784
bax	-0.0463898	0.999784
bcp	-0.00999904	0.999784
bcr	0.0276605	0.999784
bcsA	0.0497984	0.999784
bcsB	-0.016637	0.999784
bcsC	0.00993485	0.999784
bcsE	0.0252061	0.999784
bcsF	0.0293357	0.999784
bcsG	-0.0113175	0.999784
bcsZ	0.0749749	0.999784
bdm	0.0243329	0.999784
betA	0.0343344	0.999784
betB	0.0460814	0.999784
betI	-0.0203696	0.999784
betT	0.0286059	0.999784
bglA	0.0405464	0.999784
bglB	0.0232803	0.999784
bglF	-0.00626444	0.999784
bglG	-0.0698009	0.999784
bglH	0.00275106	0.999784
bglX	0.00660943	0.999784
bioA	-0.00595128	0.999784
bioB	-0.0640781	0.999784
bioC	-0.0354029	0.999784
bioD	-0.0693021	0.999784
bioF	-0.0258097	0.999784
bioH	0.0261424	0.999784
bipA	-0.134232	0.999784
blr	0.00504513	0.999784
bolA	0.0321784	0.999784
brnQ	-0.0240486	0.999784
btuB	0.0429156	0.999784
btuC	-0.00347777	0.999784
btuD	-0.0594754	0.999784
btuE	-0.00292015	0.999784
btuF	0.0139858	0.999784
btuR	-0.0111451	0.999784
cadA	0.0413885	0.999784
cadB	-0.0240481	0.999784
cadC	-0.0307139	0.999784
caiA	0.0477402	0.999784
caiB	0.0419283	0.999784
caiC	-0.0239077	0.999784
caiD	-0.0217132	0.999784
caiE	1.02616	0.999784
caiF	0.0590529	0.999784
caiT	0.0353642	0.999784
carA	-0.90832	0.999784
carB	-2.02513	0.999784
cbl	0.0329022	0.999784
cbpA	0.0103091	0.999784
cbpM	-0.0421814	0.999784
cbrA	0.071939	0.999784
cbrC	-0.0230968	0.999784
cchA	-0.0094933	0.999784
cchB	-0.0322026	0.999784
ccmA	-0.0187815	0.999784
ccmB	0.0100719	0.999784
ccmC	-0.00951272	0.999784
ccmD	-0.0230296	0.999784
ccmE	-0.112111	0.999784
ccmF	-0.0315184	0.999784
ccmG	-0.0774627	0.999784
ccmH	-0.022828	0.999784
cdaR	-0.000282859	0.999784
cdh	0.0372694	0.999784
cedA	0.0117103	0.999784
cfa	-0.0422999	0.999784
chaA	0.00258451	0.999784
chaB	-0.0706315	0.999784
chbA	-0.0480052	0.999784
chbC	-0.0337588	0.999784
chbF	-0.0265817	0.999784
chbG	0.0335635	0.999784
chbR	-0.0780653	0.999784
cheA	0.0532473	0.999784
cheB	0.00062753	0.999784
cheR	-0.0322876	0.999784
cheW	0.0224131	0.999784
cheY	0.0367259	0.999784
cheZ	-0.0101161	0.999784
chiA	0.00369964	0.999784
chpB	0.0329791	0.999784
chpR	0.0084521	0.999784
chpS	-0.0478355	0.999784
cirA	0.0489477	0.999784
citA	-0.030314	0.999784
citB	0.0112374	0.999784
citC	-0.0594524	0.999784
citD	-0.153633	0.999784
citE	-0.100253	0.999784
citF	0.0291364	0.999784
citG	-0.043531	0.999784
citT	-0.0190851	0.999784
citX	0.0470578	0.999784
clcA	0.0293416	0.999784
clcB	-0.0596065	0.999784
cld	0.0334752	0.999784
clpA	-0.0541032	0.999784
clpB	-0.0354771	0.999784
clpP	0.123082	0.999784
clpS	-0.0383927	0.999784
clpX	-0.0239072	0.999784
cls	0.155898	0.999784
cmk	-0.568411	0.999784
cmr	0.00487556	0.999784
cmtA	0.0155851	0.999784
cmtB	0.0130592	0.999784
coaE	NA	NA
cobB	0.0248319	0.999784
cobC	-0.0989339	0.999784
cobS	0.00937541	0.999784
cobT	0.0869987	0.999784
cobU	-0.0252529	0.999784
codA	-0.0182566	0.999784
codB	-0.022351	0.999784
cof	-0.0376874	0.999784
copA	-0.0261992	0.999784
corA	-0.0436888	0.999784
cpdA	-0.0513166	0.999784
cpdB	0.0118702	0.999784
cpsB	0.0140579	0.999784
cpxA	-0.32562	0.999784
cpxP	0.0106574	0.999784
cpxR	0.0600922	0.999784
crcA	-0.0140023	0.999784
crcB	-0.0791123	0.999784
creA	0.0547123	0.999784
creB	0.0164676	0.999784
creC	0.0545596	0.999784
creD	-0.0277519	0.999784
crl	-0.0293972	0.999784
crp	NA	NA
crr	-0.0154395	0.999784
csdA	-0.0206954	0.999784
csgA	0.0289112	0.999784
csgB	-0.0104078	0.999784
csgD	-0.036523	0.999784
csgE	0.0140767	0.999784
csgF	-0.0883882	0.999784
csiE	-0.0508639	0.999784
csiR	0.0200188	0.999784
cspA	-0.00674512	0.999784
cspB	-0.0336411	0.999784
cspC	-0.0526754	0.999784
cspD	0.0213305	0.999784
cspE	-0.0491536	0.999784
cspF	-0.0464335	0.999784
cspG	-0.0143249	0.999784
cspH	0.00729942	0.999784
cspI	-0.0118151	0.999784
cstA	-0.00955765	0.999784
cueO	-0.0357159	0.999784
cueR	-0.00209763	0.999784
cusA	-0.0192625	0.999784
cusB	-0.0245917	0.999784
cusC	0.0728037	0.999784
cusR	-0.00612534	0.999784
cusS	0.0145798	0.999784
cutA	-0.0106379	0.999784
cutC	-0.143475	0.999784
cvpA	-0.0411205	0.999784
cvrA	-0.0407404	0.999784
cyaA	0.133659	0.999784
cyaY	0.0154344	0.999784
cybB	-0.00366906	0.999784
cybC	-0.0218048	0.999784
cycA	-0.0185501	0.999784
cynR	0.00687368	0.999784
cynS	0.0155315	0.999784
cynT	-0.0192018	0.999784
cynX	0.0237265	0.999784
cyoA	-0.013264	0.999784
cyoB	-0.0106334	0.999784
cyoC	-0.015129	0.999784
cyoD	-0.0188543	0.999784
cyoE	-0.0117681	0.999784
cysA	-0.065823	0.999784
cysB	-0.302213	0.999784
cysC	-0.112585	0.999784
cysD	-0.0594106	0.999784
cysE	NA	NA
cysG	-0.121149	0.999784
cysH	-0.0846826	0.999784
cysI	-0.0902613	0.999784
cysJ	-0.210987	0.999784
cysK	0.0655424	0.999784
cysN	-0.0528182	0.999784
cysP	-0.0677391	0.999784
cysQ	-0.079217	0.999784
cysU	-0.0410572	0.999784
cysW	-0.122518	0.999784
cysZ	0.0235475	0.999784
cytR	-0.0348692	0.999784
dacA	-0.000914867	0.999784
dacB	0.022302	0.999784
dacD	-0.0186193	0.999784
dadA	0.0278669	0.999784
dadX	-0.0447681	0.999784
dam	0.106028	0.999784
damX	0.129796	0.999784
dapF	NA	NA
dbpA	0.0604874	0.999784
dcd	-0.0580678	0.999784
dcm	0.0590741	0.999784
dcp	-0.00379514	0.999784
dcrB	0.00965903	0.999784
dctA	-0.00995688	0.999784
dcuA	-0.00880986	0.999784
dcuB	0.0176257	0.999784
dcuD	0.000541306	0.999784
dcuR	0.000279202	0.999784
dcuS	-0.0393673	0.999784
ddg	0.00745448	0.999784
ddlA	0.0175677	0.999784
ddlB	-0.0357293	0.999784
ddpA	0.0586462	0.999784
ddpB	0.019442	0.999784
ddpC	0.00434606	0.999784
ddpD	0.0627221	0.999784
ddpF	-0.107666	0.999784
ddpX	0.00229784	0.999784
deaD	0.0403337	0.999784
dedA	-0.0371274	0.999784
dedD	0.0519941	0.999784
def	-0.00171999	0.999784
degP	0.103906	0.999784
degQ	-0.0164768	0.999784
degS	NA	NA
deoA	0.0100305	0.999784
deoB	1.33423e-05	0.999784
deoC	0.00942168	0.999784
deoD	0.0246462	0.999784
deoR	-0.130222	0.999784
dgkA	-0.139594	0.999784
dgoA	0.00396623	0.999784
dgoD	-0.00839118	0.999784
dgoK	0.0268356	0.999784
dgoR	0.0741835	0.999784
dgoT	0.0220316	0.999784
dgsA	0.0366135	0.999784
dgt	0.0131541	0.999784
dhaH	-0.0671122	0.999784
dhaK	-0.0395899	0.999784
dhaL	0.0110829	0.999784
dhaR	-0.0776925	0.999784
dicB	-0.0510656	0.999784
dicC	-0.092328	0.999784
dinB	-0.00294343	0.999784
dinD	0.0529755	0.999784
dinF	0.00233062	0.999784
dinG	-0.0839941	0.999784
dinI	-0.0362645	0.999784
dinJ	0.0137189	0.999784
dipZ	-0.0323944	0.999784
djlA	-0.00570967	0.999784
djlB	-0.0160488	0.999784
djlC	-0.0383869	0.999784
dkgA	-0.000758242	0.999784
dkgB	-0.0170089	0.999784
dksA	-0.288474	0.999784
dld	0.0238471	0.999784
dmsA	-0.0172266	0.999784
dmsB	-0.0322298	0.999784
dmsC	-0.0131357	0.999784
dmsD	-0.0872699	0.999784
dnaB	0.0633618	0.999784
dnaJ	-0.117966	0.999784
dnaK	NA	NA
dnaQ	-0.85894	0.999784
dos	0.0667861	0.999784
dppA	0.0470972	0.999784
dppB	0.081265	0.999784
dppC	0.0157322	0.999784
dppD	0.0163389	0.999784
dppF	0.0468867	0.999784
dps	-0.0499612	0.999784
dsbB	-0.244787	0.999784
dsbC	0.0264624	0.999784
dsbG	-0.0253846	0.999784
dsdA	-0.0363672	0.999784
dsdC	0.0197798	0.999784
dsdX	0.0626771	0.999784
dsrB	-0.0162633	0.999784
dtd	0.0259352	0.999784
dusB	0.00978935	0.999784
dusC	0.0269716	0.999784
eaeH	0.0539566	0.999784
eamA	0.0118651	0.999784
ebgA	-0.0415926	0.999784
ebgC	-0.0326897	0.999784
ebgR	0.0269909	0.999784
eco	0.0145152	0.999784
ecpD	0.0488493	0.999784
eda	-0.0326432	0.999784
edd	0.0611792	0.999784
ego	-0.0713294	0.999784
elaA	-0.0530711	0.999784
elaB	0.0281825	0.999784
elaC	-0.0470429	0.999784
elaD	-0.0359814	0.999784
elbA	-0.0671717	0.999784
elbB	NA	NA
emrA	0.0175081	0.999784
emrB	-0.0365826	0.999784
emrD	0.0350061	0.999784
emrE	0.0784019	0.999784
emrK	-0.212704	0.999784
emrY	-0.0190732	0.999784
emtA	-0.0329146	0.999784
endA	0.0296141	0.999784
entA	0.0324231	0.999784
entB	0.0620598	0.999784
entC	-0.0203878	0.999784
entD	0.0351347	0.999784
entE	0.0196557	0.999784
entF	0.0442279	0.999784
envC	0.0525459	0.999784
envR	-0.00528596	0.999784
envY	0.0373852	0.999784
envZ	-0.0439958	0.999784
epd	-0.00287954	0.999784
eptA	0.0231864	0.999784
eptB	0.0567498	0.999784
erfK	0.0205957	0.999784
essD	-0.048311	0.999784
etp	0.00487626	0.999784
eutA	0.0300824	0.999784
eutB	0.0332633	0.999784
eutC	-0.00441648	0.999784
eutE	-0.0439201	0.999784
eutG	0.011911	0.999784
eutH	-0.022725	0.999784
eutI	0.0149385	0.999784
eutJ	-0.0157449	0.999784
eutL	0.0282211	0.999784
eutP	0.0324937	0.999784
eutQ	0.0215806	0.999784
eutT	0.00826891	0.999784
evgA	0.0793745	0.999784
evgS	-0.0510234	0.999784
exbB	-0.000211998	0.999784
exbD	-0.0258872	0.999784
exo	-5.80059e-05	0.999784
exoX	-0.00973115	0.999784
exuR	-0.0383503	0.999784
exuT	0.0844826	0.999784
fabF	-0.0411831	0.999784
fabH	0.15408	0.999784
fabR	-0.307456	0.724938
fadA	0.0288199	0.999784
fadB	0.0100393	0.999784
fadD	-0.0625439	0.999784
fadE	0.0435578	0.999784
fadH	0.00421458	0.999784
fadL	-0.0561399	0.999784
fadR	-0.0714336	0.999784
fbaB	0.0145367	0.999784
fbp	0.0974186	0.999784
fcl	-0.0262868	0.999784
fdhD	0.0311256	0.999784
fdhE	0.0163191	0.999784
fdhF	0.00947663	0.999784
fdnG	0.0477067	0.999784
fdnH	0.0761258	0.999784
fdnI	-0.0091187	0.999784
fdoG	0.0116883	0.999784
fdoI	0.0470718	0.999784
fdrA	-0.0356884	0.999784
fdx	0.180177	0.999784
feaB	-0.0293897	0.999784
feaR	-0.020951	0.999784
fecA	-0.00679598	0.999784
fecB	-0.00241982	0.999784
fecC	-0.0566598	0.999784
fecD	0.0125556	0.999784
fecE	-0.0140512	0.999784
fecI	0.00141001	0.999784
fecR	-0.0283187	0.999784
feoA	-0.0125758	0.999784
feoB	-0.0238446	0.999784
fepA	-0.0164561	0.999784
fepB	NA	NA
fepD	NA	NA
fepE	0.0161227	0.999784
fepG	-0.0106692	0.999784
fhiA	0.0951002	0.999784
fhlA	-0.00688139	0.999784
fhuA	0.0485034	0.999784
fhuB	0.0170451	0.999784
fhuC	0.0245969	0.999784
fhuD	-0.0256658	0.999784
fhuE	-0.0571489	0.999784
fhuF	-0.0413003	0.999784
fic	0.0249851	0.999784
fieF	-0.00897673	0.999784
fimA	-0.0196912	0.999784
fimB	-0.023192	0.999784
fimC	0.00692401	0.999784
fimE	0.0478772	0.999784
fimF	0.0109836	0.999784
fimG	-0.0367033	0.999784
fimH	0.00211308	0.999784
fimI	-0.0232649	0.999784
fimZ	0.0491865	0.999784
fis	0.00887834	0.999784
fiu	0.0252061	0.999784
fixA	0.00828217	0.999784
fixB	-0.0317757	0.999784
fixC	-0.0446543	0.999784
fixX	0.0131615	0.999784
fklB	0.0160497	0.999784
fkpA	0.0358865	0.999784
fkpB	0.010292	0.999784
fldB	0.0237256	0.999784
flgB	-0.059309	0.999784
flgC	-0.0727927	0.999784
flgD	-0.000201579	0.999784
flgE	-0.0158141	0.999784
flgF	-0.0565361	0.999784
flgG	-0.00117595	0.999784
flgH	-0.0703228	0.999784
flgI	-0.0196719	0.999784
flgJ	0.0217831	0.999784
flgK	0.0435118	0.999784
flgL	-0.141013	0.999784
flgN	-1.466e-05	0.999784
flhA	-0.0314188	0.999784
flhB	-0.0809031	0.999784
flhE	0.0151083	0.999784
fliA	0.0299048	0.999784
fliC	0.0176679	0.999784
fliD	-0.0216333	0.999784
fliE	-0.0138521	0.999784
fliF	-0.0253739	0.999784
fliG	0.0208069	0.999784
fliH	0.0525046	0.999784
fliI	-0.110524	0.999784
fliJ	-0.116118	0.999784
fliK	0.0577521	0.999784
fliL	-0.089844	0.999784
fliM	-0.0736178	0.999784
fliN	-0.0391108	0.999784
fliO	-0.0301802	0.999784
fliP	-0.0817547	0.999784
fliQ	-0.0171379	0.999784
fliR	-0.0153026	0.999784
fliS	0.0516992	0.999784
fliT	0.0981471	0.999784
fliY	-0.0204418	0.999784
fliZ	-0.0722425	0.999784
flk	0.0637976	0.999784
flu	-0.0944961	0.999784
flxA	-0.0325987	0.999784
fnr	-0.0683416	0.999784
focA	-0.11675	0.999784
focB	-0.0223254	0.999784
folA	NA	NA
folB	NA	NA
folC	NA	NA
folE	NA	NA
folK	NA	NA
folM	-0.151281	0.999784
folX	-0.0583606	0.999784
fpr	-0.0283409	0.999784
frc	-0.1795	0.999784
frdA	0.033009	0.999784
fre	0.0402631	0.999784
frlA	0.0125933	0.999784
frlB	0.0238772	0.999784
frlC	0.0199184	0.999784
frlD	0.0103059	0.999784
frlR	0.0208489	0.999784
frmA	-0.048351	0.999784
frmB	-0.00231799	0.999784
frmR	0.0353083	0.999784
frsA	-0.251507	0.999784
fruA	-0.00345808	0.999784
fruB	-0.0297715	0.999784
fruK	-0.0493791	0.999784
fruR	0.00149027	0.999784
frvA	0.0141381	0.999784
frvB	0.000263515	0.999784
frvX	0.0384106	0.999784
frwB	-0.0173611	0.999784
frwC	0.0326221	0.999784
frwD	0.00914685	0.999784
fsaA	-0.0106953	0.999784
fsaB	0.00951848	0.999784
fsr	-0.00740537	0.999784
ftn	0.00775733	0.999784
ftsB	0.728776	0.999784
ftsE	-0.257092	0.999784
ftsN	-0.0740072	0.999784
ftsX	0.207262	0.999784
fucA	-0.0257215	0.999784
fucI	-0.0130775	0.999784
fucK	-0.00721828	0.999784
fucO	-0.00759857	0.999784
fucP	-0.0151563	0.999784
fucR	-0.0192124	0.999784
fucU	0.0133947	0.999784
fumA	-0.0973348	0.999784
fumB	0.0122031	0.999784
fumC	0.0231622	0.999784
fur	0.00142355	0.999784
fxsA	-0.100777	0.999784
gabD	-0.0612155	0.999784
gabP	0.0941747	0.999784
gabT	0.0279313	0.999784
gadC	-0.034888	0.999784
gadE	-0.00830841	0.999784
gadW	0.0290005	0.999784
gadX	-0.00531298	0.999784
galE	0.0261176	0.999784
galF	-0.042173	0.999784
galK	-0.0304574	0.999784
galM	-0.0587757	0.999784
galR	0.00312521	0.999784
galS	0.0780695	0.999784
galT	0.0394826	0.999784
galU	NA	NA
gapA	0.0889487	0.999784
garD	-0.00870358	0.999784
garK	0.0052102	0.999784
garL	-0.0679111	0.999784
garP	0.0150039	0.999784
garR	-0.0537589	0.999784
gatC	0.00830382	0.999784
gatD	-0.0464103	0.999784
gatY	-0.00394071	0.999784
gatZ	0.0223508	0.999784
gcd	0.0285564	0.999784
gcl	0.0216016	0.999784
gcvA	-0.034225	0.999784
gcvH	-0.102328	0.999784
gcvP	-0.0332895	0.999784
gcvR	-0.0738064	0.999784
gcvT	0.0429001	0.999784
gdhA	-0.0114915	0.999784
ggt	0.0426408	0.999784
gidA	-0.532863	0.999784
gidB	0.141605	0.999784
glcB	-0.0363719	0.999784
glcC	0.0871269	0.999784
glcD	0.027637	0.999784
glcE	0.0182635	0.999784
glcF	0.0473509	0.999784
glcG	-0.0159114	0.999784
gldA	0.0257212	0.999784
glf	0.0669454	0.999784
glgA	0.00815997	0.999784
glgB	0.0190913	0.999784
glgC	-0.0312734	0.999784
glgP	0.000825138	0.999784
glgS	-0.0353505	0.999784
glgX	0.0166301	0.999784
glk	-0.0450368	0.999784
glmM	1.29651	0.999784
glnB	-0.0355484	0.999784
glnD	-0.109223	0.999784
glnE	-0.00224946	0.999784
glnG	-0.0388571	0.999784
glnH	-0.045291	0.999784
glnK	-0.059957	0.999784
glnL	0.0550658	0.999784
glnP	-0.0342653	0.999784
glnQ	-0.0436377	0.999784
gloA	-0.149536	0.999784
gloB	-0.0105846	0.999784
glpA	0.0193216	0.999784
glpB	0.0260069	0.999784
glpC	0.0445785	0.999784
glpD	0.0306373	0.999784
glpE	-0.0311025	0.999784
glpF	0.0203573	0.999784
glpG	0.0686995	0.999784
glpK	0.0418271	0.999784
glpQ	0.0251288	0.999784
glpR	0.0715292	0.999784
glpT	-0.00663879	0.999784
glpX	0.0702902	0.999784
gltA	0.021838	0.999784
gltD	-0.0408327	0.999784
gltF	0.00785982	0.999784
gltI	0.000108273	0.999784
gltJ	0.0225651	0.999784
gltK	0.045451	0.999784
gltL	0.0281839	0.999784
gltP	0.0306499	0.999784
gltS	-0.00636836	0.999784
glvB	0.0348559	0.999784
glvC	0.0782968	0.999784
glvG	0.0232225	0.999784
glxK	0.0242967	0.999784
glxR	-0.00422709	0.999784
glyA	0.449083	0.999784
gmd	-0.0537481	0.999784
gmhB	NA	NA
gmr	-0.126811	0.999784
gnd	0.0202026	0.999784
gnsA	NA	NA
gntK	0.0855596	0.999784
gntP	0.00353571	0.999784
gntR	0.0474578	0.999784
gntT	0.0439325	0.999784
gntU	0.0452396	0.999784
gntX	-0.0117244	0.999784
gntY	0.149468	0.999784
gor	0.0295132	0.999784
gph	0.0265848	0.999784
gpmA	-0.125704	0.999784
gpp	0.0485958	0.999784
gpt	0.0734346	0.999784
greA	0.0701815	0.999784
greB	0.0491538	0.999784
groL	NA	NA
grxA	0.0612045	0.999784
grxB	0.0016275	0.999784
grxC	0.0305359	0.999784
gshA	-0.022467	0.999784
gshB	0.0337087	0.999784
gsk	0.0432891	0.999784
gspA	0.0225068	0.999784
gspC	0.0735276	0.999784
gspD	-0.00515203	0.999784
gspE	0.0587235	0.999784
gspG	0.0829855	0.999784
gspH	0.0710214	0.999784
gss	-0.00822369	0.999784
gst	0.0195829	0.999784
guaA	NA	NA
guaB	NA	NA
guaC	-0.00503595	0.999784
guaD	-0.00393383	0.999784
gudD	-0.0164673	0.999784
gudP	-0.0213179	0.999784
gudX	0.0385906	0.999784
gutM	-0.0890575	0.999784
gutQ	0.0750427	0.999784
hcaB	-0.000922595	0.999784
hcaC	0.067781	0.999784
hcaD	0.00825474	0.999784
hcaE	-0.159023	0.999784
hcaF	0.000734709	0.999784
hcaR	0.0597073	0.999784
hcaT	0.026016	0.999784
hchA	0.0190574	0.999784
hcp	-0.034542	0.999784
hcr	0.0326642	0.999784
hda	1.03068	0.999784
hdeA	0.0234002	0.999784
hdeB	-0.00341393	0.999784
hdeD	0.0801581	0.999784
hdfR	-0.100842	0.999784
hdhA	-0.0355192	0.999784
helD	0.0320692	0.999784
hemF	-0.0159071	0.999784
hemG	-0.891188	0.999784
hemN	0.000499828	0.999784
hemX	-0.0717675	0.999784
hemY	0.0312241	0.999784
hepA	-0.0479469	0.999784
hflC	0.0331778	0.999784
hflD	-0.0634265	0.999784
hflK	0.145691	0.999784
hflX	0.0457607	0.999784
hfq	-0.705058	0.999784
hha	-0.00687357	0.999784
hinT	0.0114094	0.999784
hipA	-0.115102	0.999784
hipB	0.0128391	0.999784
hisA	0.0461081	0.999784
hisB	-0.0913643	0.999784
hisC	0.0113487	0.999784
hisD	0.0611003	0.999784
hisF	-0.00406285	0.999784
hisH	-0.0172902	0.999784
hisI	0.0314467	0.999784
hisJ	0.0781359	0.999784
hisL	-0.0275446	0.999784
hisM	-0.0148821	0.999784
hisP	-0.001895	0.999784
hisQ	0.0224635	0.999784
hlpA	-0.043524	0.999784
hlyE	-0.0677431	0.999784
hmp	0.0260612	0.999784
hns	-0.967499	0.999784
hofB	0.100868	0.999784
hofC	-0.00766947	0.999784
hofQ	-0.00150475	0.999784
hokA	0.0600543	0.999784
hokB	-0.0489808	0.999784
hokC	-0.0195053	0.999784
hokD	0.0739163	0.999784
hokE	-0.000500609	0.999784
holC	-0.75639	0.999784
holD	0.449083	0.999784
holE	-0.0301837	0.999784
hpt	-0.0356394	0.999784
hrpA	0.0459794	0.999784
hrpB	0.0133455	0.999784
hscA	-0.198794	0.999784
hscB	0.046296	0.999784
hscC	-0.031726	0.999784
hsdM	0.0310297	0.999784
hsdR	0.0680571	0.999784
hsdS	0.0417956	0.999784
hslJ	-0.0449475	0.999784
hslO	0.0920329	0.999784
hslR	0.0516178	0.999784
hslU	0.00688138	0.999784
hslV	-0.00604892	0.999784
hsrA	0.0329739	0.999784
htgA	0.0205989	0.999784
htpG	0.0248535	0.999784
htpX	-0.00710618	0.999784
htrC	0.0362315	0.999784
htrE	-0.101135	0.999784
htrG	0.0345121	0.999784
hupA	-0.0147543	0.999784
hupB	-0.0302322	0.999784
hyaA	0.091128	0.999784
hyaB	-0.00626535	0.999784
hyaC	-0.0534584	0.999784
hyaD	0.00213349	0.999784
hyaE	0.0220835	0.999784
hyaF	-0.0136777	0.999784
hybA	-0.0150909	0.999784
hybB	0.0211803	0.999784
hybC	0.0634207	0.999784
hybD	-0.000296857	0.999784
hybE	-0.00904382	0.999784
hybF	-0.0140968	0.999784
hybG	0.00608909	0.999784
hybO	-0.000515836	0.999784
hycA	-0.00145874	0.999784
hycB	0.0160678	0.999784
hycC	0.0206339	0.999784
hycD	0.020546	0.999784
hycE	-0.106075	0.999784
hycF	-0.0230576	0.999784
hycG	-0.0095051	0.999784
hycH	-0.00885669	0.999784
hycI	0.0186795	0.999784
hydN	0.0327076	0.999784
hyfA	-0.0118226	0.999784
hyfB	0.0283081	0.999784
hyfC	-1.80269e-05	0.999784
hyfD	-0.0438561	0.999784
hyfE	0.000128189	0.999784
hyfF	0.0520521	0.999784
hyfG	0.00725179	0.999784
hyfH	0.00646456	0.999784
hyfI	0.0223566	0.999784
hyfJ	-0.106455	0.999784
hyfR	-0.0290574	0.999784
hyi	0.0329285	0.999784
hypA	0.00877049	0.999784
hypB	0.0408643	0.999784
hypC	0.0143201	0.999784
hypD	0.0208674	0.999784
hypE	0.0208005	0.999784
hypF	-0.054249	0.999784
hyuA	0.0167921	0.999784
iaaA	0.00231615	0.999784
iadA	-0.0456699	0.999784
iap	0.0103573	0.999784
ibpA	0.0431911	0.999784
ibpB	0.0524393	0.999784
icd	0.0938178	0.999784
icdC	-0.0170489	0.999784
iclR	0.0512669	0.999784
idi	0.0331726	0.999784
idnD	-0.0509656	0.999784
idnK	-0.0486772	0.999784
idnO	-0.0163299	0.999784
idnR	0.0130487	0.999784
idnT	-0.0159843	0.999784
ihfA	0.449083	0.999784
ihfB	-0.705056	0.999784
ileS	NA	NA
ilvA	0.0191653	0.999784
ilvB	0.0112111	0.999784
ilvD	0.0284322	0.999784
ilvE	0.0490637	0.999784
ilvH	-0.00409024	0.999784
ilvI	0.0438712	0.999784
ilvL	0.0224476	0.999784
ilvM	0.00215644	0.999784
ilvN	0.00657997	0.999784
ilvY	0.0235278	0.999784
inaA	-0.0169844	0.999784
intA	0.032809	0.999784
intB	-0.0105453	0.999784
intD	-0.0419298	0.999784
intE	-0.0840851	0.999784
intF	0.104753	0.999784
intQ	-0.198709	0.999784
intR	0.0285363	0.999784
intS	0.081156	0.999784
iscA	0.0389207	0.999784
iscR	0.0593405	0.999784
iscS	NA	NA
iscU	0.0558752	0.999784
ispA	NA	NA
ispU	NA	NA
ivbL	0.0189334	0.999784
ivy	-0.0101952	0.999784
katE	0.214137	0.999784
katG	0.00411643	0.999784
kbaY	0.0310701	0.999784
kbaZ	0.0136881	0.999784
kbl	0.0198634	0.999784
kch	-0.135522	0.999784
kdgK	-0.00729949	0.999784
kdgR	-0.0574579	0.999784
kdgT	0.00859799	0.999784
kdpA	-0.0168413	0.999784
kdpB	0.0546239	0.999784
kdpC	-0.0261399	0.999784
kdpD	-0.156141	0.999784
kdpE	-0.00869407	0.999784
kdpF	-0.0291579	0.999784
kdsC	-0.0122711	0.999784
kdsD	0.0298696	0.999784
kduD	-0.0807957	0.999784
kduI	0.00532751	0.999784
kefB	0.0438494	0.999784
kefC	-0.0288997	0.999784
kefF	-0.00437099	0.999784
kefG	-0.0223134	0.999784
kgtP	-0.105207	0.999784
kil	0.339478	0.999784
kptA	-0.0540125	0.999784
ksgA	-0.0323023	0.999784
lacA	-0.0218661	0.999784
lar	0.0213396	0.999784
ldcA	-0.111446	0.999784
ldcC	-0.0140047	0.999784
ldhA	-0.0108368	0.999784
lepA	0.154601	0.999784
leuA	-0.0225195	0.999784
leuB	-0.0452518	0.999784
leuC	0.00762764	0.999784
leuD	-0.0369633	0.999784
leuL	-0.0168897	0.999784
leuO	0.0173697	0.999784
lhr	0.00360138	0.999784
ligB	0.00203361	0.999784
ligT	0.0238743	0.999784
lipA	-1.48028	0.999784
lipB	0.0267717	0.999784
lit	0.129884	0.999784
livF	-0.0531297	0.999784
livG	-0.0347532	0.999784
livH	-0.00805463	0.999784
livJ	-0.0421769	0.999784
livK	0.102574	0.999784
livM	-0.0175015	0.999784
lldD	0.00144106	0.999784
lldP	0.0370941	0.999784
lldR	-0.0182682	0.999784
lon	0.109084	0.999784
lpcA	0.449083	0.999784
lpd	NA	NA
lplA	0.0172684	0.999784
lpp	-0.190525	0.999784
lpxA	0.151686	0.999784
lrp	0.0365579	0.999784
lsrB	-0.407694	0.999784
lsrC	-0.165529	0.999784
lsrD	-0.025028	0.999784
lsrF	0.0614401	0.999784
lsrG	-0.0774611	0.999784
ltaE	-0.0391444	0.999784
luxS	-0.189307	0.999784
lysA	0.0179831	0.999784
lysC	0.0476058	0.999784
lysP	0.0345506	0.999784
lysR	0.0092501	0.999784
lysS	-0.0639316	0.999784
lysU	0.0245821	0.999784
lyxK	-0.0489364	0.999784
maa	0.00416532	0.999784
macA	-0.0232343	0.999784
macB	0.0329335	0.999784
maeB	0.0470626	0.999784
mak	0.0177035	0.999784
malE	0.0452128	0.999784
malG	0.0448246	0.999784
malI	-0.1618	0.999784
malK	0.0271148	0.999784
malM	0.0121622	0.999784
malP	0.00733544	0.999784
malQ	0.0514661	0.999784
malS	0.0224866	0.999784
malT	0.10184	0.999784
malX	-0.00246299	0.999784
malY	0.0355106	0.999784
malZ	-0.0159239	0.999784
manA	0.0174793	0.999784
manX	-0.0404314	0.999784
manY	-0.0119477	0.999784
manZ	-0.0485852	0.999784
maoC	-0.0130697	0.999784
marA	-0.0613427	0.999784
marC	-0.0639209	0.999784
marR	-0.0333018	0.999784
mazG	0.00599496	0.999784
mbhA	-0.0391306	0.999784
mcrA	-0.0781582	0.999784
mcrB	0.069148	0.999784
mcrC	0.0584783	0.999784
mdaB	-0.00427842	0.999784
mdh	0.017275	0.999784
mdlA	0.00897152	0.999784
mdlB	0.014988	0.999784
mdoB	0.0486924	0.999784
mdoC	-0.00202082	0.999784
mdoD	0.0437147	0.999784
mdoG	-0.00214346	0.999784
mdoH	0.0794907	0.999784
mdtA	0.0473009	0.999784
mdtB	0.0615849	0.999784
mdtC	0.000840583	0.999784
mdtD	-0.0222476	0.999784
mdtE	0.0227856	0.999784
mdtF	-0.055696	0.999784
mdtG	-0.0520121	0.999784
mdtH	-0.0207997	0.999784
mdtI	0.0064014	0.999784
mdtJ	0.0222357	0.999784
mdtK	-0.00328908	0.999784
melA	-0.0161672	0.999784
melB	0.0202724	0.999784
melR	0.0251566	0.999784
menA	-0.0210434	0.999784
menB	0.0418815	0.999784
menD	0.0218613	0.999784
menE	0.0422309	0.999784
menF	0.033152	0.999784
mepA	-0.0199271	0.999784
metA	0.0364287	0.999784
metB	0.038588	0.999784
metC	0.00998148	0.999784
metE	-0.0244109	0.999784
metF	0.0598505	0.999784
metH	0.0265889	0.999784
metI	-0.176952	0.999784
metJ	-0.065343	0.999784
metL	-0.108398	0.999784
metN	0.00165797	0.999784
metQ	NA	NA
metR	0.0411097	0.999784
mfd	-0.0601634	0.999784
mglA	0.0437681	0.999784
mglB	-0.0563617	0.999784
mglC	-0.0228656	0.999784
mgsA	-0.00971803	0.999784
mgtA	0.0242394	0.999784
mhpA	0.0225605	0.999784
mhpB	0.0321472	0.999784
mhpC	-0.0484771	0.999784
mhpD	0.042854	0.999784
mhpE	-0.052717	0.999784
mhpF	0.0288153	0.999784
mhpR	0.0345326	0.999784
mhpT	-0.023826	0.999784
miaA	0.106657	0.999784
miaB	-0.018139	0.999784
minC	0.0142821	0.999784
minD	0.076824	0.999784
minE	0.106017	0.999784
mioC	0.0185543	0.999784
mipA	0.070209	0.999784
mlrA	-0.048547	0.999784
mltB	0.0208091	0.999784
mltC	-0.0112884	0.999784
mltD	0.0499101	0.999784
mmuM	0.172534	0.999784
mmuP	0.166778	0.999784
mngA	0.0174922	0.999784
mngB	-0.0235069	0.999784
mngR	0.0187456	0.999784
mntH	-0.0787485	0.999784
mntR	0.041578	0.999784
moaA	-0.0458628	0.999784
moaB	0.0301494	0.999784
moaC	-0.0446108	0.999784
moaD	0.0505083	0.999784
moaE	-0.0223997	0.999784
mobB	0.0564586	0.999784
modA	-0.0533142	0.999784
modB	0.0163837	0.999784
modC	-0.038007	0.999784
modE	-0.0274719	0.999784
modF	-0.0257416	0.999784
moeA	-0.00176119	0.999784
moeB	0.067493	0.999784
mog	0.102268	0.999784
motA	0.103204	0.999784
motB	0.0577584	0.999784
mpaA	0.0021472	0.999784
mpl	0.029315	0.999784
mppA	0.0207581	0.999784
mprA	0.0514297	0.999784
mqo	0.02297	0.999784
mraW	0.0471599	0.999784
mraZ	-0.00405483	0.999784
mrcA	0.00216421	0.999784
mrcB	-0.13933	0.999784
mreD	NA	NA
mrp	-0.00409913	0.999784
mrr	-0.0266031	0.999784
mscL	0.0164317	0.999784
msrA	0.0400156	0.999784
msyB	-0.0348703	0.999784
mtgA	-0.0179703	0.999784
mtlA	-0.00372145	0.999784
mtlD	0.00643342	0.999784
mtlR	0.0202668	0.999784
mtr	0.0548442	0.999784
murP	-0.0276185	0.999784
mutH	-0.403401	0.999784
mutL	NA	NA
mutM	0.0472121	0.999784
mutS	NA	NA
mutT	NA	NA
mutY	-0.0379214	0.999784
mviM	-0.00335237	0.999784
nac	-0.0354949	0.999784
nadA	-0.0356002	0.999784
nadB	-0.0764713	0.999784
nadC	-0.0655604	0.999784
nadR	0.0549624	0.999784
nagA	-0.102002	0.999784
nagB	-0.0602556	0.999784
nagC	-1.06277	0.999784
nagD	0.0145114	0.999784
nagE	0.0148974	0.999784
nagZ	-0.0275362	0.999784
nanA	-0.0168505	0.999784
nanE	-0.00756895	0.999784
nanR	-0.0229064	0.999784
nanT	-0.022578	0.999784
napA	-0.00546975	0.999784
napB	-0.0292642	0.999784
napC	0.032925	0.999784
napD	-0.0132821	0.999784
napF	-0.0726265	0.999784
napG	0.00921493	0.999784
napH	-0.0165404	0.999784
narG	0.0446597	0.999784
narH	-0.0209322	0.999784
narJ	0.0118368	0.999784
narK	-0.0413864	0.999784
narL	0.0211195	0.999784
narQ	-0.0499017	0.999784
narU	-0.0574732	0.999784
narV	-0.0285053	0.999784
narW	0.0431366	0.999784
narX	0.0415589	0.999784
narY	-0.0705507	0.999784
narZ	-0.094588	0.999784
ndh	-0.123752	0.999784
ndk	0.0896395	0.999784
nemA	-0.0365988	0.999784
nfi	-0.206994	0.999784
nfo	0.0747952	0.999784
nfrA	0.107139	0.999784
nfrB	-0.0750568	0.999784
nfsA	-0.0353116	0.999784
nhaA	-0.0022399	0.999784
nhaB	-0.0278939	0.999784
nhaR	0.0282001	0.999784
nhoA	-0.0674351	0.999784
nikA	0.0520255	0.999784
nikB	0.0154611	0.999784
nikC	0.0600903	0.999784
nikD	-0.0540725	0.999784
nikE	0.000992811	0.999784
nikR	-0.00567589	0.999784
ninE	-0.0619648	0.999784
nirB	0.00226906	0.999784
nirC	0.0366744	0.999784
nirD	0.0320531	0.999784
nlpA	0.0233389	0.999784
nlpB	-0.0547603	0.999784
nlpC	0.00322064	0.999784
nlpD	-0.140795	0.999784
nlpE	0.0165513	0.999784
nlpI	-0.0482626	0.999784
nmpC	0.0332474	0.999784
norR	-0.0189775	0.999784
norV	-0.0145457	0.999784
norW	0.0237425	0.999784
npr	-0.0460321	0.999784
nrdD	-0.0858021	0.999784
nrdE	-0.0644055	0.999784
nrdF	0.0392871	0.999784
nrdG	0.0277553	0.999784
nrdH	0.0532056	0.999784
nrdI	0.00754317	0.999784
nrfA	-0.0161137	0.999784
nrfB	0.0145858	0.999784
nrfC	-0.0282679	0.999784
nrfD	-0.00501707	0.999784
nrfE	-0.00234933	0.999784
nrfF	0.0287432	0.999784
nrfG	0.00147864	0.999784
nth	-0.0179797	0.999784
nudB	1.00828	0.999784
nudC	0.003656	0.999784
nudD	0.0242284	0.999784
nudF	0.00204117	0.999784
nudG	-0.103657	0.999784
nudH	-0.522929	0.999784
nuoA	0.0708556	0.999784
nuoB	0.107069	0.999784
nuoC	-0.0164894	0.999784
nuoE	-0.0407035	0.999784
nuoG	0.0484669	0.999784
nuoH	-0.014752	0.999784
nuoI	NA	NA
nuoJ	-0.0310039	0.999784
nuoM	0.121097	0.999784
nuoN	-0.0258736	0.999784
nupC	-0.0540159	0.999784
nupG	-0.0157417	0.999784
nusB	-0.0467567	0.999784
ogrK	-0.0273633	0.999784
ogt	-0.0162938	0.999784
ompA	-0.229667	0.999784
ompC	0.260791	0.999784
ompF	0.0957061	0.999784
ompG	0.0150636	0.999784
ompL	-0.00625324	0.999784
ompN	0.15103	0.999784
ompR	2.33053	0.999784
ompT	-0.0340635	0.999784
ompW	-0.0354075	0.999784
ompX	-0.0014941	0.999784
oppB	-0.0344026	0.999784
oppC	-0.0569595	0.999784
oppD	0.00899078	0.999784
oppF	0.0231332	0.999784
osmB	0.00693183	0.999784
osmC	-0.157943	0.999784
osmE	0.0203107	0.999784
osmY	0.0361771	0.999784
otsA	0.00813466	0.999784
otsB	-0.00252954	0.999784
oxc	0.0458555	0.999784
oxyR	0.151952	0.999784
paaA	0.0159782	0.999784
paaB	0.00916123	0.999784
paaC	-0.0179713	0.999784
paaD	-0.00161058	0.999784
paaE	0.107789	0.999784
paaF	-0.0286816	0.999784
paaG	-0.128011	0.999784
paaH	0.0363857	0.999784
paaI	-0.0323431	0.999784
paaJ	0.0378322	0.999784
paaK	0.0405589	0.999784
paaX	0.00899391	0.999784
paaY	-0.0612876	0.999784
pabA	0.00825572	0.999784
pabB	0.00796245	0.999784
pabC	-0.0583296	0.999784
pal	0.126973	0.999784
panB	-0.0328112	0.999784
panC	-0.0980321	0.999784
panD	-0.0287674	0.999784
panE	-0.0164864	0.999784
panF	-0.0323466	0.999784
pbl	-0.018979	0.999784
pbpC	0.0493055	0.999784
pbpG	-0.0457857	0.999784
pck	0.0377784	0.999784
pcm	-0.0580851	0.999784
pcnB	-0.0198542	0.999784
pdhR	0.00719635	0.999784
pdxA	-0.0146405	0.999784
pdxB	-0.741588	0.999784
pdxJ	-0.287162	0.999784
pdxK	0.0257847	0.999784
pdxY	-0.110235	0.999784
pepA	0.00530897	0.999784
pepB	0.0880071	0.999784
pepD	-0.0292971	0.999784
pepE	0.0361869	0.999784
pepN	-0.0729051	0.999784
pepP	0.0362915	0.999784
pepQ	0.0326056	0.999784
pepT	-0.0448026	0.999784
perR	NA	NA
pfkA	-0.110331	0.999784
pfkB	0.024329	0.999784
pflA	-0.0595533	0.999784
pflB	-0.0597595	0.999784
pflC	0.0286182	0.999784
pflD	0.032383	0.999784
pfs	0.0438889	0.999784
pgi	-0.247022	0.999784
pgm	0.114987	0.999784
pgpA	-0.369718	0.999784
pgpB	-0.28012	0.999784
pheA	-0.094661	0.999784
pheL	0.00342451	0.999784
pheP	-0.0042268	0.999784
phnB	0.0784147	0.999784
phnC	0.0178064	0.999784
phnD	0.0597977	0.999784
phnE	0.0499776	0.999784
phnF	0.0505343	0.999784
phnG	0.0538106	0.999784
phnH	0.0428114	0.999784
phnI	0.0284514	0.999784
phnJ	0.00863216	0.999784
phnK	0.0523512	0.999784
phnL	0.0828394	0.999784
phnM	0.00802526	0.999784
phnN	-0.0447911	0.999784
phnO	0.0356694	0.999784
phnP	0.041075	0.999784
phoA	0.00957903	0.999784
phoB	0.00378697	0.999784
phoE	-0.00198618	0.999784
phoH	-0.0169277	0.999784
phoP	0.37546	0.999784
phoQ	NA	NA
phoR	-0.0219867	0.999784
phoU	-0.011316	0.999784
php	-0.00393953	0.999784
phr	-0.0541263	0.999784
pin	0.0597928	0.999784
pinH	-0.0588121	0.999784
pinQ	-0.177568	0.999784
pioO	0.0645958	0.999784
pitA	0.0626089	0.999784
pitB	0.00552986	0.999784
pldA	0.00393458	0.999784
pldB	0.00608127	0.999784
plsB	0.00467269	0.999784
plsX	-0.0181631	0.999784
pmbA	-0.0351505	0.999784
pmrD	-0.0398066	0.999784
pncA	-0.0703196	0.999784
pncB	-0.032448	0.999784
pnp	0.061794	0.999784
pntA	-0.0437077	0.999784
pntB	0.0352945	0.999784
pnuC	-0.00123187	0.999784
polA	0.106449	0.999784
polB	-0.0278954	0.999784
potA	0.0430383	0.999784
potB	0.00314647	0.999784
potC	-0.0217141	0.999784
potD	-0.0775435	0.999784
potE	-0.018849	0.999784
potF	0.014411	0.999784
potG	0.01524	0.999784
potH	0.054541	0.999784
potI	-0.0187406	0.999784
poxA	-0.072007	0.999784
poxB	-0.0322324	0.999784
ppc	-0.118244	0.999784
ppdA	0.0147578	0.999784
ppdB	-0.0308507	0.999784
ppdC	-0.00214864	0.999784
ppdD	0.0308131	0.999784
pphA	0.019366	0.999784
pphB	-0.0549806	0.999784
ppiA	0.0314924	0.999784
ppiB	-0.0538881	0.999784
ppiD	-0.0315807	0.999784
ppk	-0.0912087	0.999784
pppA	0.00229104	0.999784
pps	-0.0594292	0.999784
ppx	0.214014	0.999784
pqiA	-0.0739906	0.999784
pqiB	-0.0869022	0.999784
pqqL	-0.0335499	0.999784
prc	-0.337641	0.999784
prfC	-0.175598	0.999784
prfH	0.00248633	0.999784
priA	0.0899778	0.999784
priB	NA	NA
priC	0.0239823	0.999784
prkB	-0.00760354	0.999784
prlC	-0.0161898	0.999784
prmA	-0.0920236	0.999784
prmB	-0.141007	0.999784
prmC	NA	NA
proA	-0.00773143	0.999784
proB	0.0792614	0.999784
proC	0.191805	0.999784
proP	-0.05083	0.999784
proQ	-0.049813	0.999784
proV	-0.0150899	0.999784
proW	-0.0389334	0.999784
proX	0.0139955	0.999784
proY	0.00891897	0.999784
prpB	-0.0126702	0.999784
prpC	-0.0142075	0.999784
prpD	0.0636028	0.999784
prpE	-0.015629	0.999784
prpR	-0.0806867	0.999784
psiF	-0.0123518	0.999784
pspA	0.0611452	0.999784
pspB	0.100655	0.999784
pspC	-0.0111323	0.999784
pspD	0.0841707	0.999784
pspE	0.0178597	0.999784
pspF	0.000695292	0.999784
pstA	-0.169429	0.999784
pstB	0.00596629	0.999784
pstS	-0.0476031	0.999784
pta	0.0346661	0.999784
ptr	0.0331327	0.999784
ptrB	NA	NA
ptsA	0.0252299	0.999784
ptsG	-0.165438	0.999784
ptsI	-0.19024	0.999784
ptsN	0.0593294	0.999784
ptsP	0.0159358	0.999784
purA	-0.450469	0.999784
purB	NA	NA
purC	-0.903878	0.999784
purD	-0.108879	0.999784
purE	-0.00188165	0.999784
purF	-0.441702	0.999784
purH	-0.21197	0.999784
purK	-0.164168	0.999784
purL	-0.31272	0.999784
purM	0.0265001	0.999784
purN	-0.0163101	0.999784
purR	-0.0797184	0.999784
purT	0.0201686	0.999784
purU	-0.016542	0.999784
puuA	0.0152836	0.999784
puuB	0.0823069	0.999784
puuC	-0.121213	0.999784
puuD	0.0254161	0.999784
puuE	0.0681843	0.999784
puuP	-0.0105453	0.999784
puuR	-0.0213194	0.999784
pykA	0.041477	0.999784
pykF	0.0110028	0.999784
pyrB	-1.28213	0.999784
pyrC	-2.92379	0.999784
pyrD	-0.10631	0.999784
pyrF	-1.3056	0.999784
pyrI	-0.0116851	0.999784
pyrL	0.0959928	0.999784
qor	0.021605	0.999784
qseB	0.0407332	0.999784
qseC	-0.0773057	0.999784
queA	0.0171334	0.999784
racC	-0.896761	0.999784
radA	0.0380636	0.999784
rarA	0.0257144	0.999784
rarD	0.0177329	0.999784
rbbA	0.0627739	0.999784
rbfA	-0.888638	0.999784
rbn	0.02427	0.999784
rbsA	0.0542269	0.999784
rbsB	0.0674797	0.999784
rbsC	0.0605512	0.999784
rbsD	0.00828954	0.999784
rbsK	0.0249271	0.999784
rbsR	0.00119987	0.999784
rcsA	-0.116807	0.999784
rcsD	0.0171434	0.999784
rcsF	-0.00999292	0.999784
rdgC	0.00238987	0.999784
recA	-0.335604	0.999784
recB	-0.625044	0.999784
recC	0.1083	0.999784
recD	0.0189852	0.999784
recE	-0.0630786	0.999784
recF	-0.0334795	0.999784
recG	0.0688772	0.999784
recJ	-0.00177925	0.999784
recN	0.00935551	0.999784
recO	0.00107716	0.999784
recQ	0.00717678	0.999784
recR	0.00576998	0.999784
recT	0.0269887	0.999784
recX	0.0183156	0.999784
relA	-0.0800601	0.999784
relE	-0.0442004	0.999784
rem	-0.0212271	0.999784
renD	0.00711942	0.999784
rep	0.210886	0.999784
rfaB	-0.0351312	0.999784
rfaC	NA	NA
rfaD	-1.47927	0.999784
rfaE	1.76484	0.999784
rfaF	-0.370582	0.999784
rfaG	0.293992	0.999784
rfaH	0.242435	0.999784
rfaI	-0.00667576	0.999784
rfaJ	0.0209389	0.999784
rfaK	0.00945325	0.999784
rfaL	0.0378906	0.999784
rfaQ	0.0154694	0.999784
rfaS	0.0188131	0.999784
rfaY	0.0574111	0.999784
rfaZ	0.0729271	0.999784
rfbA	-0.0775783	0.999784
rfbB	0.031693	0.999784
rfbC	0.0298226	0.999784
rfbD	-0.0659696	0.999784
rfbX	0.0342784	0.999784
rfe	0.0245454	0.999784
rffA	-0.0130372	0.999784
rffC	-0.108709	0.999784
rffD	-0.00097875	0.999784
rffE	0.00764237	0.999784
rffG	0.0177532	0.999784
rffH	0.0174941	0.999784
rffM	0.024362	0.999784
rffT	0.0195599	0.999784
rhaA	-0.015078	0.999784
rhaB	0.00524481	0.999784
rhaD	0.0387592	0.999784
rhaR	0.0343203	0.999784
rhaS	0.0686602	0.999784
rhaT	-0.0451587	0.999784
rhlB	0.045959	0.999784
rhlE	-0.00511497	0.999784
rhoL	-0.0044005	0.999784
rhsD	0.102679	0.999784
rhsE	0.230862	0.999784
rhtA	-0.045723	0.999784
rhtB	0.0474026	0.999784
rhtC	0.0375178	0.999784
rihA	-0.145326	0.999784
rihB	0.0297035	0.999784
rihC	0.0711119	0.999784
rimI	-0.027392	0.999784
rimJ	-0.0292062	0.999784
rimK	0.00926688	0.999784
rimL	0.0253757	0.999784
rimM	NA	NA
rlmB	0.0527312	0.999784
rlpA	-0.0329865	0.999784
rluA	0.0235756	0.999784
rluB	-0.0152335	0.999784
rluC	-0.0302755	0.999784
rluD	-0.0700734	0.999784
rmf	-0.00277959	0.999784
rmuC	0.0171243	0.999784
rna	0.0261055	0.999784
rnb	-0.0556479	0.999784
rnc	0.388602	0.999784
rnd	-0.0874003	0.999784
rng	0.0329642	0.999784
rnhA	-0.0499196	0.999784
rnhB	0.0536701	0.999784
rnk	0.00984815	0.999784
rnr	NA	NA
rnt	0.211091	0.999784
rob	-0.0391961	0.999784
rof	-0.0544499	0.999784
rpe	0.124942	0.999784
rph	0.0348103	0.999784
rpiA	0.659523	0.999784
rpiB	0.0418739	0.999784
rpiR	0.060961	0.999784
rplD	NA	NA
rplI	-0.0652758	0.999784
rplU	1.02616	0.999784
rpmA	NA	NA
rpmB	-0.450221	0.999784
rpmE	0.163235	0.999784
rpmF	0.0773955	0.999784
rpmH	-1.08323	0.999784
rpmI	-0.127986	0.999784
rpmJ	-0.581688	0.999784
rpoD	-0.474877	0.999784
rpoS	-0.202919	0.999784
rpoZ	0.00769507	0.999784
rpsO	0.863926	0.999784
rpsT	-0.0542947	0.999784
rpsU	-0.525874	0.999784
rraA	0.0117869	0.999784
rrmA	-0.0144567	0.999784
rrmJ	NA	NA
rsd	0.0114416	0.999784
rseB	-0.000278846	0.999784
rseC	0.00379319	0.999784
rsgA	-1.81366	0.999784
rsmB	0.00423781	0.999784
rsmC	0.0669054	0.999784
rspA	0.0041272	0.999784
rspB	-0.0275375	0.999784
rssA	-0.150871	0.999784
rssB	0.345999	0.999784
rstA	-0.000112263	0.999784
rstB	0.0520749	0.999784
rsuA	-0.0168417	0.999784
rsxA	-0.0334122	0.999784
rsxB	-0.0248887	0.999784
rsxC	-0.0304831	0.999784
rsxD	-0.172921	0.999784
rsxE	0.00425649	0.999784
rsxG	-0.114628	0.999784
rtcA	0.00748544	0.999784
rtcB	0.064878	0.999784
rtcR	0.0637517	0.999784
rtn	-0.0336497	0.999784
rumA	0.0473838	0.999784
rumB	0.00429687	0.999784
rusA	0.0569644	0.999784
ruvA	-0.101156	0.999784
ruvB	0.118325	0.999784
ruvC	-0.176956	0.999784
rzoD	-0.0309803	0.999784
rzpD	-0.00617814	0.999784
sanA	-0.126606	0.999784
sapA	0.0122055	0.999784
sapB	-0.0309404	0.999784
sapC	-0.0370209	0.999784
sapD	0.009452	0.999784
sapF	-0.0631724	0.999784
sbcB	-0.0119795	0.999784
sbcC	-0.047769	0.999784
sbcD	0.0364855	0.999784
sbmA	-0.00643246	0.999784
sbmC	-0.189537	0.999784
sbp	0.0105566	0.999784
sdaA	-0.0630126	0.999784
sdaB	0.0194592	0.999784
sdaC	-0.0248289	0.999784
sdhA	NA	NA
sdhB	-0.0356393	0.999784
sdhC	-0.0483897	0.999784
sdhD	-0.00704586	0.999784
sdiA	0.03031	0.999784
secB	0.0807137	0.999784
secD	NA	NA
secF	NA	NA
secG	0.136978	0.999784
selA	0.0481705	0.999784
selB	-0.075357	0.999784
selD	-0.0852017	0.999784
seqA	-0.51662	0.999784
serA	-0.134306	0.999784
serB	-0.0962084	0.999784
serC	0.0717847	0.999784
setA	0.0236824	0.999784
setB	-0.00948037	0.999784
setC	-0.0300515	0.999784
sfcA	0.05924	0.999784
sfmA	0.0339599	0.999784
sfmC	0.00352537	0.999784
sfmF	0.0277256	0.999784
sfmH	-0.131657	0.999784
sfsB	0.0465689	0.999784
sgbE	0.026394	0.999784
sgbH	0.019273	0.999784
sgbU	-0.0308852	0.999784
sgcB	0.012559	0.999784
sgcC	-0.00381237	0.999784
sgcE	0.00260671	0.999784
sgcQ	-0.0301004	0.999784
sgcR	-0.00621806	0.999784
sgcX	0.0191587	0.999784
sgrR	0.0241465	0.999784
shiA	-0.0387143	0.999784
sieB	0.0946963	0.999784
sixA	-0.0247812	0.999784
slp	0.0429477	0.999784
slt	0.00818304	0.999784
slyA	-0.0604504	0.999784
slyB	-0.0212123	0.999784
slyD	0.0505068	0.999784
slyX	-0.0151524	0.999784
smf	0.0199666	0.999784
smg	0.0146598	0.999784
smpA	0.110153	0.999784
smpB	-0.0266302	0.999784
smtA	0.089609	0.999784
sodA	0.0378285	0.999784
sodB	0.0496327	0.999784
sodC	-0.0146384	0.999784
sohA	-0.152623	0.999784
sohB	0.0275446	0.999784
solA	0.0556217	0.999784
soxR	0.0470403	0.999784
soxS	0.0240234	0.999784
speA	0.0161487	0.999784
speB	0.0580117	0.999784
speC	0.0283202	0.999784
speD	-0.065378	0.999784
speE	-0.00561164	0.999784
speF	0.0300345	0.999784
speG	-0.0878043	0.999784
sppA	0.0269453	0.999784
spr	0.0681441	0.999784
sprT	-0.0600551	0.999784
spy	0.0131153	0.999784
sra	0.151817	0.999784
srlA	0.0105543	0.999784
srlB	0.0128156	0.999784
srlD	-0.0272415	0.999784
srlE	0.00620351	0.999784
srlR	0.0356202	0.999784
srmB	-0.118024	0.999784
sseA	0.0372785	0.999784
sseB	-0.0319904	0.999784
ssnA	0.00709627	0.999784
sspA	-0.0915864	0.999784
sspB	-0.0300864	0.999784
sstT	-0.0547	0.999784
ssuB	0.0791503	0.999784
ssuC	0.0373347	0.999784
ssuD	-0.0202444	0.999784
ssuE	0.0433947	0.999784
stfE	0.125406	0.999784
stfQ	0.0896121	0.999784
stfR	0.0489158	0.999784
sthA	0.0163964	0.999784
stpA	0.034489	0.999784
sucB	0.00386906	0.999784
sucC	-0.0172594	0.999784
sucD	0.0623754	0.999784
sufA	-0.0615133	0.999784
sufB	-0.051991	0.999784
sufC	-0.00324925	0.999784
sufD	-0.155175	0.999784
sufE	0.0569906	0.999784
sufI	-0.0100798	0.999784
sufS	-0.0702307	0.999784
sulA	-0.034359	0.999784
surA	0.524098	0.999784
surE	-0.000419858	0.999784
syd	0.0322905	0.999784
tag	-0.0270793	0.999784
talA	0.037942	0.999784
talB	0.00961637	0.999784
tam	-0.0265785	0.999784
tap	0.0413853	0.999784
tar	0.0398716	0.999784
tas	-0.0237683	0.999784
tatA	-0.0155654	0.999784
tatB	-0.00210616	0.999784
tatE	0.00234788	0.999784
tauA	0.0332678	0.999784
tauB	-0.0172694	0.999784
tauC	-0.00833138	0.999784
tauD	-0.0199512	0.999784
tbpA	-0.036715	0.999784
tdcA	-0.0313758	0.999784
tdcB	0.0356439	0.999784
tdcC	0.0291554	0.999784
tdcF	-0.00349005	0.999784
tdcG	-0.0073979	0.999784
tdcR	0.0952466	0.999784
tdh	-0.0487574	0.999784
tdk	-0.0227141	0.999784
tehA	0.00960493	0.999784
tehB	0.0180615	0.999784
tesA	0.020008	0.999784
tesB	-0.059628	0.999784
tfaD	-0.00505907	0.999784
tfaE	-0.0250666	0.999784
tfaS	-0.0151479	0.999784
tgt	-0.0183734	0.999784
thiC	0.0420803	0.999784
thiD	-0.0428897	0.999784
thiE	-0.0068226	0.999784
thiF	-0.0240263	0.999784
thiG	-0.00483638	0.999784
thiH	-0.0280997	0.999784
thiI	-0.00536164	0.999784
thiM	-0.152999	0.999784
thiP	0.0177897	0.999784
thiQ	0.0221676	0.999784
thiS	-0.020014	0.999784
thrA	0.0272035	0.999784
thrB	-0.00428647	0.999784
thrC	0.0365805	0.999784
thrL	0.0596003	0.999784
tiaE	-0.0388382	0.999784
tig	0.0380078	0.999784
tktB	0.0103327	0.999784
tldD	-0.0150246	0.999784
tolA	-0.610482	0.999784
tolB	0.102251	0.999784
tolC	NA	NA
tolQ	-0.107312	0.999784
tolR	0.415132	0.999784
tonB	0.00709114	0.999784
topB	-0.0730436	0.999784
torA	-0.0109454	0.999784
torC	-0.0558711	0.999784
torD	NA	NA
torI	-0.0441036	0.999784
torR	-0.023575	0.999784
torS	0.0156743	0.999784
torT	0.196831	0.999784
torY	-0.0172347	0.999784
torZ	-0.0311127	0.999784
tpiA	0.449083	0.999784
tpr	-0.0527401	0.999784
treA	-0.0654217	0.999784
treB	0.0367989	0.999784
treC	0.0775066	0.999784
treF	-0.0524019	0.999784
treR	0.0344554	0.999784
trg	0.132539	0.999784
trkA	0.0731863	0.999784
trkD	0.0245903	0.999784
trkG	-0.0453607	0.999784
trkH	0.0502091	0.999784
trmA	0.0593258	0.999784
trmC	0.00072521	0.999784
trmE	-0.784844	0.999784
trmH	0.0182032	0.999784
trmU	-0.155162	0.999784
trpA	-0.433094	0.999784
trpB	-0.438435	0.999784
trpC	-0.0678007	0.999784
trpD	0.00139947	0.999784
trpE	-0.223964	0.999784
trpL	-0.054027	0.999784
trpR	0.0451256	0.999784
truA	0.0299454	0.999784
truB	0.0711471	0.999784
truD	0.0115987	0.999784
trxA	0.077443	0.999784
trxB	-0.0197679	0.999784
trxC	-0.0574019	0.999784
tsgA	0.0223571	0.999784
tsr	-0.00177644	0.999784
ttdA	0.0475864	0.999784
ttdB	0.0161593	0.999784
tus	0.134564	0.999784
tynA	0.0119711	0.999784
tyrA	-0.0336156	0.999784
tyrB	0.0327322	0.999784
tyrP	-0.049241	0.999784
tyrR	-0.0275063	0.999784
ubiB	0.0045169	0.999784
ubiC	0.0016666	0.999784
ubiD	-0.0129066	0.999784
ubiF	0.0684626	0.999784
ubiG	0.0653423	0.999784
ubiH	0.808109	0.999784
ubiX	-1.78821	0.999784
ucpA	-0.0234707	0.999784
udk	-0.0341491	0.999784
udp	-0.00202911	0.999784
ugd	-0.0262264	0.999784
ugpA	0.0603101	0.999784
ugpB	0.00601214	0.999784
ugpC	0.032487	0.999784
ugpE	0.0235763	0.999784
ugpQ	0.0150094	0.999784
uhpA	-0.00787003	0.999784
uhpB	0.0373401	0.999784
uhpC	0.0227337	0.999784
uhpT	-0.032445	0.999784
uidA	0.0283434	0.999784
uidB	-0.199952	0.999784
uidC	0.015858	0.999784
ulaA	-0.00115579	0.999784
ulaB	0.00524194	0.999784
ulaC	0.0249103	0.999784
ulaD	0.0389497	0.999784
ulaE	-0.0301902	0.999784
ulaF	0.0344319	0.999784
ulaG	0.0331691	0.999784
ulaR	-0.0537867	0.999784
umuC	-0.0782713	0.999784
umuD	-0.0356605	0.999784
ung	0.0238197	0.999784
upp	-0.0331528	0.999784
uraA	0.0166756	0.999784
usg	0.015101	0.999784
ushA	0.00144436	0.999784
uspA	0.0038052	0.999784
uspE	-0.0425779	0.999784
uspF	-0.0363998	0.999784
uspG	0.0225819	0.999784
uup	-0.0567785	0.999784
uvrA	-0.10009	0.999784
uvrB	-0.151673	0.999784
uvrC	-0.00141657	0.999784
uvrD	NA	NA
uvrY	-0.0829293	0.999784
uxaA	0.035734	0.999784
uxaB	-0.0404607	0.999784
uxaC	0.00170055	0.999784
uxuA	0.0110836	0.999784
uxuB	0.424551	0.999784
uxuR	-0.0279969	0.999784
vacJ	0.00186494	0.999784
visC	0.0185446	0.999784
vsr	-0.0777812	0.999784
wbbH	0.107163	0.999784
wbbI	-0.110646	0.999784
wbbJ	0.188845	0.999784
wbbK	-0.0205763	0.999784
wcaA	-0.0158868	0.999784
wcaB	0.0419109	0.999784
wcaC	-0.0487283	0.999784
wcaD	-0.00910675	0.999784
wcaE	0.0225145	0.999784
wcaF	-0.0114293	0.999784
wcaI	-0.0171333	0.999784
wcaJ	0.054293	0.999784
wcaK	-0.00396237	0.999784
wcaL	0.0482454	0.999784
wcaM	NA	NA
wrbA	-0.0217027	0.999784
wza	0.00701455	0.999784
wzb	0.0105032	0.999784
wzc	-0.0907366	0.999784
wzxC	-0.0162038	0.999784
wzxE	1.02069	0.999784
wzzE	0.036704	0.999784
xapA	-0.0249203	0.999784
xapB	0.014577	0.999784
xapR	-0.00709324	0.999784
xdhA	-0.0859065	0.999784
[truncated: 1,681 more rows]

## Sheet: 24h_10_to_1
strain	log2(fold-change)	adjusted p-value
aaeA	0.0141849	0.848655
aaeB	0.0145701	0.745754
aaeR	0.017695	0.686039
aaeX	0.0627026	0.297843
aas	0.0245962	0.535629
aat	-0.066491	0.248014
abgA	-0.215486	0.0341377
abgB	0.164885	0.565063
abgR	-0.0643229	0.372223
abgT	-0.116318	0.24139
abrB	-0.055166	0.535391
aceA	0.14884	0.000349455
aceB	0.0864877	0.156432
aceE	NA	NA
aceF	-0.347803	0.478
aceK	0.179502	0.00069283
ackA	-0.86186	0.387309
acnA	-0.237689	6.8893e-06
acnB	0.0277418	0.694782
acpT	0.102972	0.0884307
acrA	1.02167	0.457723
acrB	0.107544	0.924143
acrD	-0.0346611	0.364662
acrE	-0.0381655	0.484781
acrF	0.0474124	0.384014
acrR	-0.0151032	0.822592
acs	0.0611929	0.0658165
actP	0.118278	0.00033635
ada	0.0247485	0.625913
add	-0.168273	0.107072
ade	0.0825618	0.00683401
adhE	-1.04977	1.24614e-14
adhP	-0.0308411	0.727817
adiA	0.0169511	0.848099
adiC	0.0789452	0.173512
adiY	0.0526944	0.341299
aegA	-0.0998011	0.0031787
aer	0.109991	0.0176387
aes	0.0314669	0.485888
afuB	0.126675	0.636818
afuC	0.184159	0.411652
agaA	0.200461	0.125939
agaB	0.0325062	0.678586
agaD	0.0939346	0.0713649
agaI	0.0709126	0.173512
agaR	-0.0565559	0.324572
agaS	0.12215	0.0105348
agaV	0.0813234	0.0424383
agaW	0.0784419	0.0376541
agp	-0.157803	0.00103707
ahpF	-0.0650132	0.260327
aidB	0.131619	0.0019768
ais	-0.0357441	0.381468
aldB	0.0797176	0.0312073
alkA	-0.00513035	0.951794
alkB	-0.0411341	0.526033
allA	0.0362764	0.35204
allB	0.185719	0.0522337
allC	-0.0183287	0.869485
allD	-0.0735917	0.344924
allR	0.00492724	0.938254
alpA	0.0684176	0.51935
alr	0.109106	0.00838602
alsA	0.112087	0.000191171
alsB	0.157229	6.14686e-06
alsC	0.0189677	0.767678
alsE	0.103165	0.00251753
alx	0.059336	0.138683
amiA	0.121647	0.0023021
amiB	0.0788666	0.091879
amn	-0.0102549	0.968188
ampD	0.128041	0.0255306
ampE	0.0432688	0.661769
ampG	0.0345312	0.448516
ampH	-0.00717809	0.922464
amtB	-0.0901128	0.0824204
amyA	-0.073262	0.235569
ansA	-0.113157	0.252181
ansB	0.0475797	0.317304
ansP	0.0593097	0.449349
apaG	0.29304	9.41031e-29
apaH	-0.368229	0.00533202
aphA	0.106869	0.0238679
appA	-0.0741709	0.353696
appB	-0.0798229	0.0972122
appC	-0.01653	0.832632
apt	0.0584487	0.220999
aqpZ	-0.0417196	0.386564
araA	NA	NA
araB	NA	NA
araC	-0.0148372	0.849973
araE	-0.0422867	0.425536
araF	-0.0665017	0.546504
araG	-0.0426972	0.64419
araH	-0.0438974	0.582355
araJ	0.0108659	0.850829
arcA	-1.36827	0.439813
arcB	-0.262223	0.161753
argA	-0.0196967	0.684339
argB	0.106497	1.18917e-05
argC	0.0639737	0.033614
argD	NA	NA
argE	0.0328786	0.526535
argF	0.192554	0.533856
argG	0.109648	0.000761472
argH	0.0790369	0.0391192
argO	0.116341	0.162589
argP	0.0499185	0.371865
argT	-0.0401639	0.659586
arnT	0.00237071	0.968188
aroA	-0.15137	0.00828501
aroB	0.119316	0.0520569
aroC	-0.346537	4.90217e-07
aroD	-0.147877	0.533856
aroE	NA	NA
aroF	0.0789277	0.0519476
aroG	-0.0608914	0.437325
aroH	-0.0832297	0.631882
aroL	0.0805874	0.0956526
aroM	0.145999	0.00747481
aroP	0.0668863	0.374222
arpA	0.158207	0.000653452
arsB	0.0362544	0.468966
arsC	0.133509	0.00126487
arsR	0.0514662	0.386448
artI	-0.0459114	0.477549
artJ	-0.0754895	0.0593958
artM	-0.0711875	0.0817006
artP	-0.131813	0.0114682
artQ	-0.0381351	0.485339
ascB	-0.112806	0.0687125
ascF	-0.0666898	0.50671
ascG	0.0953226	0.199499
aslA	0.131733	0.000107392
aslB	0.0661277	0.202321
asmA	-0.167621	0.441828
asnA	0.0834857	0.0259367
asnB	-0.0533942	0.325377
asnC	0.0162323	0.818305
aspA	0.0327099	0.773417
aspC	-0.221244	0.295342
asr	-0.0765257	0.313041
astA	-0.160974	1.60027e-05
astB	-0.139323	0.0231166
astC	-0.13832	0.0264086
astD	-0.18054	0.0754203
astE	-0.291097	0.00984146
atoA	-0.0370171	0.467301
atoB	0.0284939	0.566367
atoC	0.0610402	0.233355
atoD	-0.0348248	0.618578
atoE	-0.0312838	0.537384
atoS	0.0194255	0.766121
atpA	-1.63039	1.44705e-06
atpB	-1.61533	1.80342e-08
atpC	-2.20052	8.42723e-14
atpE	-1.59152	1.3575e-06
atpF	-1.59487	6.71415e-06
atpG	-1.86965	8.58379e-07
atpI	0.0950928	0.00884687
avtA	0.0685687	0.104722
azoR	0.0786969	0.459291
bacA	0.17258	2.90171e-07
baeR	-0.0116009	0.90842
baeS	-0.0841289	0.24436
barA	-0.0858084	0.0112844
basR	-0.0143882	0.872243
basS	0.0236175	0.82272
bax	0.134597	0.00100636
bcp	-0.168087	0.00188481
bcr	-0.0428927	0.50668
bcsA	0.0751434	0.0389864
bcsB	0.0293882	0.53291
bcsC	0.0925917	0.0370117
bcsE	0.0951032	0.0683626
bcsF	0.117628	0.0034328
bcsG	0.0547782	0.168315
bcsZ	0.0912358	0.0205559
bdm	-0.0481742	0.610329
betA	0.0498927	0.392164
betB	-0.122068	0.0762195
betI	0.0493994	0.321357
betT	0.027029	0.675642
bglA	0.0200404	0.756156
bglB	0.0573649	0.261651
bglF	0.07006	0.115449
bglG	0.116947	0.0235156
bglH	0.134749	0.00097962
bglX	-0.0507213	0.474222
bioA	-0.201031	0.0101687
bioB	-0.232166	0.0959249
bioC	-0.194968	0.00325293
bioD	-0.22105	0.0416449
bioF	-0.25205	0.00138846
bioH	-0.103207	0.118661
bipA	-0.0364101	0.832632
blr	-0.20153	0.0612077
bolA	-0.0199732	0.675642
brnQ	0.00052522	0.993192
btuB	0.144005	1.73564e-05
btuC	-0.0608259	0.614926
btuD	-0.171556	0.20759
btuE	-0.0159811	0.881177
btuF	-0.0715768	0.241544
btuR	-0.122636	0.0353241
cadA	0.0300692	0.549208
cadB	0.0568476	0.537248
cadC	0.0977689	0.154484
caiA	0.0213923	0.564517
caiB	0.0799186	0.00409886
caiC	0.0647002	0.0651866
caiD	0.0483414	0.076812
caiE	0.659445	0.85179
caiF	0.0331915	0.482812
caiT	0.0216298	0.727021
carA	-2.29574	0.227583
carB	-2.98828	0.325967
cbl	0.0575071	0.673973
cbpA	-0.0424428	0.462743
cbpM	-0.0518866	0.324196
cbrA	0.122443	1.12425e-06
cbrC	0.0792477	0.150428
cchA	0.00119356	0.983043
cchB	-0.108038	0.000634785
ccmA	-0.0361034	0.625035
ccmB	-0.0332654	0.610837
ccmC	-0.0588885	0.301317
ccmD	-0.0663094	0.379027
ccmE	-0.0175386	0.821574
ccmF	-0.0284197	0.767678
ccmG	-0.0524688	0.605771
ccmH	-0.0604165	0.338131
cdaR	0.0662267	0.0727291
cdh	0.150835	2.41941e-06
cedA	-0.136651	0.0275468
cfa	-0.401029	5.39016e-07
chaA	-0.248547	0.016959
chaB	-0.259606	1.17166e-05
chbA	-0.00986284	0.951794
chbC	-0.0685165	0.48921
chbF	-0.0362998	0.785216
chbG	-0.114474	0.104732
chbR	-0.320762	0.00038842
cheA	0.0534271	0.481542
cheB	-0.059012	0.344924
cheR	-0.0770507	0.0874559
cheW	-0.12352	0.100094
cheY	-0.0013063	0.986045
cheZ	0.0182413	0.842302
chiA	0.128264	0.0380864
chpB	0.122909	0.00912794
chpR	0.0728552	0.235121
chpS	0.808804	0.0166138
cirA	-0.00325799	0.964618
citA	-0.128115	0.128434
citB	-0.0589303	0.420145
citC	-0.134755	0.449694
citD	-0.142358	0.395621
citE	0.0328406	0.885527
citF	-0.0632811	0.148891
citG	-0.0812556	0.0438625
citT	-0.0441574	0.406371
citX	-0.0829429	0.235396
clcA	-0.0357146	0.698605
clcB	-0.238569	0.0165288
cld	-0.0138579	0.832632
clpA	-0.268902	2.23249e-18
clpB	-0.0613048	0.257041
clpP	0.39736	0.00456151
clpS	-0.0484767	0.433718
clpX	0.445125	0.00772222
cls	-0.197692	0.0300424
cmk	-0.473757	0.940585
cmr	-0.0648321	0.22943
cmtA	-0.0258048	0.769546
cmtB	0.0622503	0.478382
coaE	NA	NA
cobB	-0.162958	0.0215752
cobC	0.0560014	0.559982
cobS	-0.044293	0.448823
cobT	-0.126478	0.175277
cobU	-0.00128174	0.990704
codA	-0.0182183	0.751383
codB	-0.00722373	0.927493
cof	-0.037172	0.398307
copA	-0.131422	0.000298112
corA	0.00331622	0.967505
cpdA	-0.053307	0.243552
cpdB	0.0244422	0.607598
cpsB	-0.0108204	0.925488
cpxA	-0.936391	1.535e-35
cpxP	0.00506861	0.942714
cpxR	0.285568	4.11586e-18
crcA	-0.0532903	0.445539
crcB	-0.0744436	0.203737
creA	0.090784	0.0206332
creB	0.0906715	0.0956097
creC	0.104073	0.00750178
creD	0.0656626	0.193745
crl	-0.120521	0.0025172
crp	NA	NA
crr	-0.381157	0.020919
csdA	-0.038639	0.386188
csgA	-0.150375	0.233916
csgB	-0.204627	0.00103716
csgD	-0.129254	0.0908078
csgE	-0.136222	0.0679984
csgF	-0.245548	0.0597703
csiE	-0.07261	0.467333
csiR	0.0395887	0.55288
cspA	0.033789	0.432059
cspB	-0.120265	0.406148
cspC	-0.380369	6.12602e-19
cspD	-0.0394057	0.428909
cspE	-0.192208	0.000217316
cspF	-0.0898631	0.553172
cspG	-0.170666	0.105191
cspH	-0.0737263	0.339954
cspI	-0.00103434	0.996318
cstA	-0.0209321	0.797115
cueO	-0.016225	0.772727
cueR	0.00590893	0.933178
cusA	-0.0456809	0.199591
cusB	-0.0251405	0.537041
cusC	0.322157	7.0806e-22
cusR	0.0619698	0.405423
cusS	-0.0814284	0.0687781
cutA	0.0465689	0.492879
cutC	-0.0800875	0.564919
cvpA	-0.32974	0.00156559
cvrA	-0.219327	4.7357e-07
cyaA	0.144833	0.175718
cyaY	0.126576	0.00183072
cybB	0.0816675	0.513902
cybC	0.120554	0.000369848
cycA	-0.0292069	0.607719
cynR	-0.0540818	0.529097
cynS	-0.0448021	0.524516
cynT	-0.021028	0.718293
cynX	0.024163	0.681936
cyoA	-0.0498843	0.0919137
cyoB	0.0249352	0.53122
cyoC	0.0105887	0.756486
cyoD	-0.0028839	0.944078
cyoE	-0.00412253	0.935955
cysA	-0.258421	1.42291e-11
cysB	-1.14382	0.0288968
cysC	-0.408968	1.03592e-08
cysD	-0.449695	6.2548e-12
cysE	0.103321	0.982016
cysG	-0.645126	3.58833e-18
cysH	-0.761365	1.16737e-09
cysI	-0.538539	5.9382e-13
cysJ	-0.695765	1.50724e-40
cysK	-0.617393	2.89181e-07
cysN	-0.438078	2.69846e-13
cysP	-0.242362	2.48003e-13
cysQ	-0.183099	0.558156
cysU	-0.298266	1.18271e-17
cysW	-0.297125	5.18758e-10
cysZ	-0.0548206	0.161093
cytR	-0.0019344	0.983634
dacA	-0.102775	0.46021
dacB	0.129091	0.00097962
dacD	0.0218591	0.779909
dadA	-0.141881	0.00434826
dadX	-0.173733	2.74778e-05
dam	-0.0399208	0.857801
damX	0.250977	1.31463e-08
dapF	NA	NA
dbpA	-0.017641	0.823632
dcd	-0.371394	2.52849e-32
dcm	0.00955135	0.926931
dcp	-0.112314	0.28297
dcrB	0.0457104	0.549208
dctA	0.131776	0.000848369
dcuA	-0.0823176	0.0354322
dcuB	0.0834102	0.0893435
dcuD	-0.00936535	0.866258
dcuR	0.0548579	0.235396
dcuS	0.259228	0.0266719
ddg	-0.0438588	0.52716
ddlA	0.0419529	0.408288
ddlB	0.0360023	0.519588
ddpA	-0.00196604	0.986045
ddpB	-0.0450799	0.700688
ddpC	-0.0439084	0.735644
ddpD	0.0605514	0.529006
ddpF	-0.0972259	0.437754
ddpX	0.00940946	0.968188
deaD	-0.156012	0.0501334
dedA	-0.040363	0.674563
dedD	0.0936382	0.257233
def	0.0162318	0.751795
degP	-0.0630609	0.645028
degQ	-0.00259224	0.964618
degS	NA	NA
deoA	0.115167	0.00435383
deoB	0.0277511	0.482812
deoC	0.0750753	0.0924596
deoD	0.078124	0.0109659
deoR	-0.0994034	0.420145
dgkA	0.041343	0.807018
dgoA	0.0834551	0.111301
dgoD	0.111889	0.01946
dgoK	0.0384274	0.638104
dgoR	0.143002	1.5886e-05
dgoT	0.0675873	0.00241176
dgsA	-0.0360528	0.772231
dgt	0.00585376	0.938254
dhaH	-0.314027	1.55278e-14
dhaK	-0.0973246	0.0438003
dhaL	-0.130173	0.00736492
dhaR	-0.346882	2.57816e-19
dicB	-0.126099	0.356173
dicC	0.125844	0.477494
dinB	0.00717915	0.928338
dinD	0.0739783	0.0711966
dinF	0.120194	0.000132322
dinG	-0.128073	0.0257498
dinI	-0.258767	0.125939
dinJ	0.140114	0.018815
dipZ	-0.0194583	0.864856
djlA	-0.000307267	0.996318
djlB	-0.0385294	0.621182
djlC	-0.10476	0.14509
dkgA	-0.033116	0.608897
dkgB	-0.0265749	0.751795
dksA	0.583364	0.599819
dld	-0.0236019	0.669942
dmsA	-0.109266	0.000143883
dmsB	-0.104098	0.00035223
dmsC	-0.0593112	0.270954
dmsD	-0.196887	0.00225194
dnaB	0.428939	1.01863e-06
dnaJ	-0.156056	0.188573
dnaK	NA	NA
dnaQ	0.00350823	0.998608
dos	0.0423156	0.876597
dppA	0.0990673	0.0565283
dppB	0.120788	0.000519425
dppC	0.126991	9.79593e-05
dppD	0.0770815	0.0621941
dppF	0.0750891	0.0907687
dps	-0.065174	0.531754
dsbB	-1.3402	7.92751e-15
dsbC	0.0571205	0.0683626
dsbG	-0.0693495	0.148018
dsdA	0.118401	0.162235
dsdC	-0.0878707	0.277407
dsdX	-0.10274	0.0790113
dsrB	0.0403844	0.576484
dtd	0.0617642	0.0874162
dusB	0.09937	0.0145571
dusC	0.0221223	0.941556
eaeH	0.113575	0.0634761
eamA	-0.145858	0.150421
ebgA	0.00515906	0.950765
ebgC	0.0996017	0.00513574
ebgR	-0.115288	0.137105
eco	-0.0278504	0.723856
ecpD	0.0668426	0.398307
eda	-0.14702	0.0416449
edd	-0.0211227	0.830852
ego	-0.0901482	0.454323
elaA	-0.0023217	0.973449
elaB	-0.0410183	0.706407
elaC	-0.00916258	0.882816
elaD	-0.00208918	0.973532
elbA	-0.133088	0.010077
elbB	NA	NA
emrA	0.0451336	0.280267
emrB	0.0833996	0.208125
emrD	0.0726443	0.00714047
emrE	-0.0834962	0.368163
emrK	0.0128423	0.950184
emrY	-0.107233	0.106977
emtA	-0.132087	0.00231104
endA	0.0939929	0.0455971
entA	0.0425929	0.565848
entB	0.048966	0.53291
entC	0.0292949	0.620632
entD	-0.0888125	0.100857
entE	-0.0639195	0.132126
entF	0.247007	0.00251753
envC	0.0527153	0.896842
envR	0.0229331	0.738337
envY	0.0905652	0.0726106
envZ	0.213995	0.531754
epd	0.0267348	0.71653
eptA	0.0665514	0.32891
eptB	0.0562826	0.181967
erfK	-0.0851088	0.340404
essD	0.00842877	0.948483
etp	-0.040515	0.648376
eutA	0.0204091	0.713802
eutB	-0.00125932	0.984565
eutC	-0.010226	0.841827
eutE	0.0260391	0.629222
eutG	-0.0475621	0.200466
eutH	0.00330659	0.9631
eutI	-0.0498226	0.10164
eutJ	-0.0450067	0.17047
eutL	0.00578829	0.910169
eutP	0.0595724	0.221425
eutQ	-0.0203632	0.624931
eutT	-0.00576105	0.906751
evgA	-0.0335781	0.826759
evgS	-0.133018	0.0480861
exbB	0.101812	0.0556956
exbD	0.0219915	0.747006
exo	-0.00826476	0.867883
exoX	-0.0705359	0.458786
exuR	-0.00365913	0.960592
exuT	0.10601	0.00255056
fabF	-0.187871	1.05111e-06
fabH	-1.76011	0.447695
fabR	-0.0923437	0.642353
fadA	0.155189	1.74763e-05
fadB	0.0441352	0.420534
fadD	-0.0948086	0.0660352
fadE	0.0141252	0.801486
fadH	0.145574	0.0411028
fadL	-0.0266031	0.641177
fadR	-0.225258	3.69948e-12
fbaB	-0.0778135	0.456002
fbp	0.136877	0.0679984
fcl	-0.103982	0.00771741
fdhD	0.136899	0.0197148
fdhE	0.0916537	0.0121026
fdhF	0.0589721	0.227774
fdnG	-0.11991	0.0608547
fdnH	0.00946505	0.913251
fdnI	-0.0534397	0.470465
fdoG	0.119448	0.00226656
fdoI	0.155585	0.0031787
fdrA	-0.0197601	0.807018
fdx	0.0636945	0.75654
feaB	0.00811706	0.90842
feaR	-0.0838563	0.347965
fecA	0.0207646	0.761013
fecB	-0.00783174	0.922464
fecC	-0.0963833	0.111776
fecD	0.0072032	0.941556
fecE	-0.0516711	0.401008
fecI	0.0116113	0.938098
fecR	0.0357257	0.544588
feoA	0.24672	0.000122908
feoB	0.0876632	0.331601
fepA	-0.103058	0.0156773
fepB	NA	NA
fepD	NA	NA
fepE	-0.00807809	0.939757
fepG	-0.357791	0.00239066
fhiA	0.155241	0.00145923
fhlA	-0.0257225	0.705917
fhuA	-0.0205116	0.854277
fhuB	-0.0445654	0.432724
fhuC	0.00387285	0.958292
fhuD	-0.03019	0.620194
fhuE	-0.203192	5.09209e-09
fhuF	0.0876592	0.0830785
fic	0.0490819	0.146246
fieF	0.0981772	0.0854863
fimA	0.061268	0.226246
fimB	-0.00163407	0.984565
fimC	0.0448436	0.421793
fimE	0.0979752	0.120563
fimF	-0.0287756	0.617718
fimG	0.0159842	0.814452
fimH	0.035963	0.485571
fimI	0.0737141	0.230601
fimZ	0.0746142	0.448516
fis	-0.180682	0.00937441
fiu	0.0608738	0.205903
fixA	0.00268397	0.964618
fixB	0.0183155	0.648221
fixC	-0.0546012	0.315183
fixX	-0.00199128	0.982016
fklB	0.124114	0.0145624
fkpA	0.147815	0.000830769
fkpB	0.048429	0.156432
fldB	0.012832	0.835948
flgB	-0.158099	0.0107855
flgC	-0.145379	0.00244292
flgD	-0.141817	0.000417217
flgE	-0.154802	7.96583e-06
flgF	-0.113014	0.00177447
flgG	-0.137987	0.00887744
flgH	-0.202497	4.55219e-06
flgI	-0.140814	0.00630075
flgJ	-0.117152	0.127596
flgK	-0.0943148	0.13757
flgL	-0.24344	0.00204564
flgN	-0.140943	8.45734e-05
flhA	-0.0985731	0.127844
flhB	-0.0369515	0.674876
flhE	-0.0836189	0.410741
fliA	-0.0719911	0.662681
fliC	-0.135041	0.0429594
fliD	-0.0362563	0.816804
fliE	-0.141561	0.181652
fliF	-0.0801935	0.507398
fliG	-0.07679	0.284844
fliH	-0.0132734	0.888797
fliI	-0.0854444	0.482636
fliJ	-0.175199	0.538516
fliK	-0.0546457	0.582355
fliL	-0.00333466	0.985142
fliM	-0.00188063	0.985457
fliN	-0.107049	0.19171
fliO	-0.0654297	0.632307
fliP	-0.102927	0.363592
fliQ	-0.0237514	0.785216
fliR	-0.0176782	0.923502
fliS	0.00685297	0.973532
fliT	-0.0679369	0.453661
fliY	-0.0377544	0.61562
fliZ	-0.0616205	0.406093
flk	-0.0376572	0.666536
flu	-0.151743	0.0461878
flxA	-0.0839715	0.0723147
fnr	-0.302068	0.0728226
focA	-0.0536203	0.547287
focB	0.0195991	0.864957
folA	NA	NA
folB	NA	NA
folC	NA	NA
folE	NA	NA
folK	NA	NA
folM	-0.10672	0.280201
folX	-0.0812209	0.420534
fpr	0.112806	0.00743001
frc	-0.104257	0.44942
frdA	0.0598022	0.271524
fre	0.191522	1.95681e-05
frlA	0.0776666	0.259752
frlB	0.0681379	0.106235
frlC	0.173836	1.79499e-05
frlD	0.151666	8.36352e-08
frlR	0.0794385	0.155054
frmA	-0.0586591	0.190827
frmB	-0.0792475	0.257673
frmR	-0.0234104	0.735341
frsA	-0.424259	0.0723147
fruA	-0.0182172	0.774397
fruB	-0.0122302	0.888276
fruK	-0.130785	0.0423078
fruR	-0.0861683	0.605699
frvA	0.118308	0.00435383
frvB	0.0802355	0.0453116
frvX	0.125082	0.000573585
frwB	0.0644716	0.0403535
frwC	0.0509312	0.111776
frwD	0.0629602	0.0721366
fsaA	-0.0659766	0.330202
fsaB	0.091021	0.00643241
fsr	-0.0477906	0.289421
ftn	-0.0702162	0.776843
ftsB	-2.00512	0.261031
ftsE	0.204708	0.357127
ftsN	0.23268	0.0647813
ftsX	0.21051	0.137103
fucA	-0.0159691	0.723856
fucI	-0.0327278	0.373728
fucK	0.0110575	0.840505
fucO	0.0326705	0.381425
fucP	-0.0536532	0.267421
fucR	-0.0414212	0.355004
fucU	-0.0536939	0.101974
fumA	-0.245186	0.00340126
fumB	0.0561047	0.284381
fumC	-0.110156	0.139225
fur	0.387303	0.211191
fxsA	0.00336125	0.970703
gabD	0.042817	0.641177
gabP	0.110413	0.17605
gabT	0.0406005	0.291103
gadC	-0.0174032	0.85179
gadE	-0.0877317	0.020869
gadW	0.160185	1.29337e-06
gadX	0.187402	5.02634e-06
galE	-0.170652	0.00398804
galF	0.0198976	0.813923
galK	-0.132296	0.170484
galM	-0.0392354	0.599819
galR	-0.00332623	0.951195
galS	0.0147177	0.882968
galT	-0.0413404	0.42101
galU	NA	NA
gapA	0.0250131	0.795702
garD	0.0985789	0.105994
garK	0.0657607	0.173512
garL	0.0861655	0.0432449
garP	0.045233	0.259171
garR	0.0902289	0.156296
gatC	-0.0193174	0.659267
gatD	-0.00187924	0.983043
gatY	0.0319096	0.632307
gatZ	-0.0547932	0.328799
gcd	-0.0303531	0.650994
gcl	-0.0137335	0.76947
gcvA	0.0140619	0.922464
gcvH	0.324067	0.0712866
gcvP	0.277762	0.00795415
gcvR	-0.353329	5.6426e-08
gcvT	0.31821	0.000705859
gdhA	-0.14906	0.0150756
ggt	0.216551	1.22995e-10
gidA	-0.0580363	0.942491
gidB	0.0779611	0.457094
glcB	0.024888	0.598956
glcC	0.0733243	0.172597
glcD	0.0755261	0.0648991
glcE	0.0717731	0.0487137
glcF	0.0877351	0.03986
glcG	0.0489778	0.366953
gldA	0.0772048	0.0683626
glf	0.0416532	0.798001
glgA	0.0959105	0.0672921
glgB	0.135402	0.0920202
glgC	0.111217	0.0236434
glgP	0.0782284	0.23126
glgS	0.0616792	0.308346
glgX	0.132517	0.000324105
glk	-0.106784	0.0687781
glmM	-0.702183	0.537248
glnB	-0.169438	0.00680228
glnD	-0.3175	1.98523e-08
glnE	-0.00553525	0.947327
glnG	0.0252005	0.832548
glnH	0.0295015	0.785216
glnK	-0.0536407	0.352845
glnL	0.0382837	0.448266
glnP	-0.106112	0.203737
glnQ	-0.074421	0.13136
gloA	-0.213559	0.448823
gloB	-0.0316256	0.774009
glpA	-0.0860275	0.0898902
glpB	0.0041504	0.956986
glpC	-0.0114126	0.846034
glpD	0.146308	2.98749e-07
glpE	0.0570823	0.134753
glpF	0.0856332	0.0257836
glpG	0.0832916	0.0777691
glpK	0.0999684	0.000415523
glpQ	-0.073825	0.151641
glpR	0.298805	2.33321e-05
glpT	-0.0618836	0.184179
glpX	0.136475	0.00370204
gltA	-0.0468159	0.660273
gltD	-0.148645	0.00155538
gltF	0.120241	0.307346
gltI	-0.146659	0.000229125
gltJ	0.04849	0.49692
gltK	-0.0804056	0.367906
gltL	-0.0421667	0.46193
gltP	0.0421331	0.249692
gltS	0.0692186	0.018815
glvB	0.0542447	0.0720752
glvC	0.325852	1.77327e-40
glvG	0.11193	6.29888e-08
glxK	0.0119693	0.93931
glxR	0.0170187	0.848122
glyA	NA	NA
gmd	-0.0946193	0.0614809
gmhB	0.680384	0.909223
gmr	-0.0700903	0.696352
gnd	0.0379441	0.699531
gnsA	NA	NA
gntK	0.0738012	0.384014
gntP	0.139475	0.00710419
gntR	0.256327	0.0127077
gntT	0.115349	0.0104316
gntU	0.0686237	0.204214
gntX	-0.0461394	0.582392
gntY	0.0151748	0.947035
gor	0.0205868	0.832632
gph	0.113322	3.19889e-05
gpmA	-0.199912	0.00683126
gpp	0.169314	1.22995e-10
gpt	0.0547171	0.386493
greA	-0.239937	0.00320702
greB	0.0663776	0.369481
groL	NA	NA
grxA	-0.0842769	0.0326789
grxB	-0.071244	0.11613
grxC	0.104528	6.77171e-05
gshA	-0.0134245	0.901803
gshB	0.103674	0.122552
gsk	0.0365085	0.375608
gspA	0.146692	0.00057158
gspC	0.219222	2.22508e-05
gspD	0.136192	0.00437672
gspE	0.156661	0.0335621
gspG	0.162327	0.140638
gspH	0.132875	0.00810037
gss	0.0641605	0.142567
gst	-0.160211	0.0450387
guaA	NA	NA
guaB	-0.473757	0.940585
guaC	0.0486754	0.25969
guaD	0.0199848	0.658008
gudD	0.0393915	0.467204
gudP	-0.0561741	0.179341
gudX	0.0640395	0.0760364
gutM	0.0400163	0.749825
gutQ	0.0538004	0.576484
hcaB	0.0877369	0.340404
hcaC	0.0412579	0.686675
hcaD	-0.000292777	0.997847
hcaE	-0.0129096	0.900216
hcaF	0.0160521	0.866113
hcaR	-0.0176588	0.866439
hcaT	0.0146902	0.927867
hchA	-0.0178676	0.836786
hcp	-0.147047	0.00122396
hcr	-0.00807192	0.90096
hda	-0.863386	0.740192
hdeA	0.164668	1.22939e-05
hdeB	0.0870027	0.0247959
hdeD	0.110755	0.00807077
hdfR	-0.224217	0.00111569
hdhA	-0.0997187	0.103601
helD	-0.0948651	0.015094
hemF	-0.0366957	0.420145
hemG	0.275195	0.773561
hemN	0.0967618	0.0683626
hemX	0.0245655	0.724323
hemY	0.0631295	0.276483
hepA	-0.15142	0.00013347
hflC	0.149863	0.000401861
hflD	-0.243886	0.000371274
hflK	0.201244	1.18617e-05
hflX	0.0747795	0.117291
hfq	-3.03159	0.0819712
hha	0.0639659	0.129244
hinT	-0.153034	0.0125615
hipA	-0.236448	0.288262
hipB	-0.0519871	0.747574
hisA	0.0141624	0.848655
hisB	-0.100802	0.11613
hisC	0.00694997	0.938391
hisD	-0.0144848	0.854277
hisF	-0.108186	0.0432829
hisH	-0.0675817	0.166681
hisI	0.00288592	0.964618
hisJ	0.113058	0.168073
hisL	-0.059607	0.270954
hisM	-0.111048	0.115079
hisP	0.019476	0.881177
hisQ	-0.0270512	0.816804
hlpA	-0.12896	0.0251337
hlyE	-0.14234	0.108272
hmp	-0.0417536	0.448823
hns	-0.42309	0.79399
hofB	0.00500855	0.948483
hofC	-0.0176236	0.735965
hofQ	0.185948	3.18887e-09
hokA	0.051158	0.133109
hokB	0.0635651	0.535629
hokC	0.128473	0.0229509
hokD	-0.0805215	0.430774
hokE	0.0552605	0.377075
holC	-0.48676	0.557879
holD	-1.6244	0.706832
holE	-0.0777518	0.373527
hpt	-0.0281689	0.59979
hrpA	-0.256089	0.404767
hrpB	0.143947	0.00306656
hscA	-0.406342	0.00166828
hscB	-0.0314239	0.862731
hscC	0.000560722	0.99548
hsdM	0.100868	0.141594
hsdR	0.13289	0.0354322
hsdS	0.0924241	0.118151
hslJ	-0.0922316	0.286286
hslO	0.162882	4.39703e-05
hslR	0.106141	0.00722141
hslU	0.0771175	0.0103734
hslV	0.110539	0.00221673
hsrA	0.0164152	0.79314
htgA	0.0964616	0.00962974
htpG	-0.0389934	0.436736
htpX	-0.107186	0.00589951
htrC	0.114551	0.0356251
htrE	-0.0123313	0.917412
htrG	0.091034	0.0101837
hupA	-0.237272	6.36341e-22
hupB	-0.181857	3.49734e-08
hyaA	-0.237467	0.162415
hyaB	-0.025092	0.766121
hyaC	-0.0979073	0.214238
hyaD	-0.109552	0.174849
hyaE	-0.0117753	0.894174
hyaF	-0.0564126	0.381425
hybA	0.0462549	0.299057
hybB	-0.0114515	0.866114
hybC	0.0424712	0.42908
hybD	0.0521622	0.226872
hybE	0.0532747	0.364667
hybF	0.0699133	0.386448
hybG	0.022069	0.685293
hybO	0.034922	0.533856
hycA	0.0130982	0.880912
hycB	-0.0122172	0.866113
hycC	0.0168339	0.766738
hycD	0.0508476	0.412959
hycE	-0.0249796	0.769546
hycF	0.0375134	0.481986
hycG	0.0151532	0.802007
hycH	-0.0106153	0.879708
hycI	-0.03701	0.535391
hydN	0.0403266	0.452316
hyfA	-0.0672274	0.118822
hyfB	0.0292095	0.546285
hyfC	-0.0449383	0.241916
hyfD	-0.081535	0.0200531
hyfE	-0.0390028	0.434495
hyfF	-0.0177415	0.786993
hyfG	0.00996966	0.87624
hyfH	-0.0061598	0.933311
hyfI	-0.00701373	0.954572
hyfJ	-0.131517	0.230601
hyfR	-0.00839122	0.960592
hyi	0.012775	0.852467
hypA	-0.0219969	0.749825
hypB	-0.0199691	0.732031
hypC	0.00239282	0.974112
hypD	0.0158116	0.8062
hypE	-0.0189105	0.795228
hypF	-0.0143509	0.903108
hyuA	0.0395289	0.304914
iaaA	0.0112074	0.885527
iadA	-0.0486982	0.389611
iap	0.00330642	0.96517
ibpA	0.0969164	1.64875e-05
ibpB	0.0637222	0.132441
icd	0.0420337	0.864964
icdC	-0.166817	0.00409886
iclR	0.135763	0.190558
idi	0.0169157	0.706832
idnD	-0.0592139	0.385485
idnK	-0.0180891	0.816625
idnO	-0.0406926	0.575506
idnR	0.0189966	0.756063
idnT	-0.0199666	0.72658
ihfA	0.680384	0.909223
ihfB	-2.02858	0.539442
ileS	NA	NA
ilvA	0.111866	0.007671
ilvB	0.0431068	0.161512
ilvD	0.0894411	0.0125615
ilvE	0.117398	2.09577e-05
ilvH	0.0339887	0.354716
ilvI	0.106762	0.0105098
ilvL	0.117006	2.25557e-05
ilvM	0.0981614	0.000800039
ilvN	0.0493973	0.0930108
ilvY	0.131068	0.000453169
inaA	-0.0691055	0.198276
intA	0.0576123	0.212863
intB	-0.0466061	0.550137
intD	0.0324231	0.832632
intE	-0.166363	0.0450583
intF	0.179124	0.350983
intQ	-0.131569	0.494003
intR	0.095048	0.0708707
intS	-0.169828	0.0381186
iscA	-0.0750692	0.74606
iscR	-0.00160276	0.982016
iscS	NA	NA
iscU	-0.0478483	0.86421
ispA	NA	NA
ispU	NA	NA
ivbL	0.0647006	0.00618359
ivy	0.0470646	0.347965
katE	-0.189992	0.169278
katG	0.0930889	0.0286019
kbaY	0.0448643	0.400103
kbaZ	0.0712749	0.175189
kbl	0.0328216	0.537441
kch	-0.305366	1.67269e-06
kdgK	0.0652522	0.136379
kdgR	-0.1612	0.0160044
kdgT	0.112651	0.000895413
kdpA	0.0443806	0.559784
kdpB	0.0274228	0.709403
kdpC	-0.0469813	0.268237
kdpD	-0.408036	8.45734e-05
kdpE	-0.0276584	0.793578
kdpF	-0.077864	0.515448
kdsC	-0.0111042	0.82272
kdsD	-0.00388794	0.960592
kduD	0.0567907	0.50668
kduI	0.0162992	0.706857
kefB	0.195992	3.57707e-09
kefC	-0.0268013	0.648221
kefF	0.0305833	0.597568
kefG	0.0763205	0.07547
kgtP	0.0603392	0.483348
kil	0.316879	0.725163
kptA	0.14211	0.0585524
ksgA	-0.370413	0.00110977
lacA	-0.0634519	0.275074
lar	-0.0310708	0.890317
ldcA	-1.54452	1.05111e-06
ldcC	0.0363037	0.394828
ldhA	0.00301307	0.981176
lepA	-0.169156	0.663274
leuA	0.0100468	0.822592
leuB	-0.00495921	0.95109
leuC	-0.0178299	0.727304
leuD	0.00728178	0.941556
leuL	0.0394629	0.368791
leuO	0.0312463	0.482343
lhr	-0.273146	0.000228157
ligB	0.136237	1.60027e-05
ligT	0.0398521	0.402508
lipA	-3.59612	0.0253563
lipB	-0.156195	0.608897
lit	0.370413	4.24348e-07
livF	0.0305041	0.627735
livG	0.0972888	0.0204663
livH	0.059594	0.27514
livJ	0.0604344	0.386188
livK	0.0686287	0.405693
livM	0.066438	0.299543
lldD	0.0423452	0.20759
lldP	0.0587826	0.259171
lldR	0.0493224	0.282325
lon	0.492289	3.0974e-09
lpcA	NA	NA
lpd	NA	NA
lplA	0.131277	0.0277378
lpp	-0.469397	2.90064e-08
lpxA	0.22929	0.0191816
lrp	0.283097	2.53143e-05
lsrB	-0.229536	0.344924
lsrC	-0.0875951	0.550161
lsrD	0.0476685	0.857358
lsrF	-0.047442	0.608897
lsrG	0.0999364	0.393042
ltaE	-0.0803822	0.0613276
luxS	0.093701	0.553714
lysA	0.0914473	0.020919
lysC	0.12209	0.0191816
lysP	-0.00999798	0.913251
lysR	-0.00971957	0.854526
lysS	-0.318569	1.44705e-06
lysU	0.0689521	0.167517
lyxK	0.0359674	0.563071
maa	-0.0207219	0.785216
macA	0.00380924	0.969466
macB	-0.0961405	0.00506267
maeB	0.00411119	0.951141
mak	0.0521885	0.189611
malE	0.152354	2.38089e-06
malG	0.164449	0.00124928
malI	-0.0665379	0.670094
malK	0.10988	0.000148926
malM	0.116213	0.00026389
malP	0.00155032	0.985142
malQ	0.106495	0.06799
malS	0.0962065	0.00057591
malT	0.119801	0.0380752
malX	-0.177817	0.0674097
malY	-0.208731	0.00602082
malZ	-0.0779039	0.080443
manA	-0.109466	0.197716
manX	-0.0989095	0.27889
manY	-0.173511	0.209443
manZ	-0.144955	0.00254007
maoC	-0.00182995	0.982479
marA	-0.0970275	0.51822
marC	-0.0220781	0.927493
marR	0.123866	0.192408
mazG	0.0528239	0.26497
mbhA	0.0540762	0.34461
mcrA	0.0703999	0.74742
mcrB	0.0443803	0.727304
mcrC	0.0481514	0.564495
mdaB	0.0153434	0.788101
mdh	0.161469	0.00106989
mdlA	-0.0412531	0.296312
mdlB	-0.0774341	0.109666
mdoB	0.118353	0.00533202
mdoC	-0.162348	0.00119148
mdoD	-0.0167722	0.900216
mdoG	0.0248733	0.593763
mdoH	0.137218	0.000565117
mdtA	0.0333117	0.542287
mdtB	0.0838369	0.0697158
mdtC	-0.0201279	0.74175
mdtD	-0.0636757	0.514348
mdtE	-0.104848	0.0600213
mdtF	-0.139856	0.000550746
mdtG	-0.146554	0.0164879
mdtH	-0.233294	6.60395e-05
mdtI	-0.11438	0.157698
mdtJ	-0.122931	0.166519
mdtK	-0.193273	0.00126487
melA	0.101068	0.0125615
melB	0.0395477	0.508274
melR	0.104421	0.0896553
menA	0.045532	0.340404
menB	0.0577291	0.186471
menD	-0.00403708	0.95109
menE	0.0165954	0.822309
menF	-0.0374166	0.609976
mepA	-0.0426923	0.639161
metA	0.140882	0.00106989
metB	0.0884933	0.0117906
metC	0.0588901	0.169833
metE	0.0703912	0.0744612
metF	0.0398678	0.587643
metH	0.12073	0.00378643
metI	-0.0822792	0.241758
metJ	-1.11638	0.022419
metL	-1.44659	1.57948e-13
metN	-0.00427989	0.947035
metQ	NA	NA
metR	0.0941117	0.00807077
mfd	-0.25336	2.0183e-13
mglA	-0.00166729	0.990368
mglB	-0.19022	0.0850624
mglC	-0.0043008	0.967788
mgsA	-0.0921901	0.0178878
mgtA	0.0107024	0.930353
mhpA	0.0263832	0.614926
mhpB	0.0136715	0.888797
mhpC	-0.0457103	0.59058
mhpD	0.0130446	0.864957
mhpE	-0.0121007	0.885527
mhpF	0.00538505	0.949366
mhpR	0.0506065	0.376998
mhpT	0.00520268	0.940593
miaA	-0.318509	0.135543
miaB	-0.138999	1.84335e-05
minC	0.169295	0.01476
minD	0.135711	0.00133951
minE	0.193307	0.00053929
mioC	0.135752	0.00186481
mipA	-0.0983918	0.137103
mlrA	-0.0961594	0.158817
mltB	0.0524461	0.480664
mltC	-0.0220125	0.736132
mltD	-0.130938	0.117307
mmuM	0.246941	0.312496
mmuP	0.226418	0.365488
mngA	-0.0516392	0.37547
mngB	-0.0844335	0.364662
mngR	-0.0964753	0.300436
mntH	-0.304259	2.31626e-10
mntR	-0.108082	0.093802
moaA	-0.0354772	0.654612
moaB	0.0108776	0.921677
moaC	-0.036946	0.655561
moaD	-0.0179191	0.863491
moaE	0.0037558	0.97631
mobB	0.0771992	0.0136877
modA	-0.0585257	0.591808
modB	-0.100303	0.212783
modC	-0.106736	0.241564
modE	-0.0385026	0.692958
modF	-0.0272961	0.699373
moeA	0.0308528	0.736265
moeB	-0.0353866	0.712015
mog	0.154397	0.010432
motA	-0.00707016	0.955925
motB	-0.0294285	0.759232
mpaA	-0.196408	0.00293999
mpl	0.0389457	0.480664
mppA	-0.14062	0.453508
mprA	0.134093	5.6159e-05
mqo	-0.0317536	0.572938
mraW	-0.161356	0.0723147
mraZ	-0.0287132	0.521803
mrcA	-0.0132048	0.816484
mrcB	-0.393401	0.000190683
mreD	NA	NA
mrp	-0.00509233	0.968188
mrr	0.0606293	0.294179
mscL	0.0922783	0.0024929
msrA	0.0810932	0.0443283
msyB	-0.179655	3.9746e-06
mtgA	0.0581107	0.173542
mtlA	0.0555038	0.174653
mtlD	0.0112672	0.782341
mtlR	0.0614812	0.150451
mtr	0.115682	0.0713649
murP	0.0573055	0.291512
mutH	-0.538281	0.477458
mutL	NA	NA
mutM	0.142558	4.97255e-05
mutS	NA	NA
mutT	NA	NA
mutY	-0.000440299	0.99548
mviM	-0.135081	1.84335e-05
nac	-0.130951	0.01476
nadA	-0.512703	0.00442028
nadB	-0.485558	6.24609e-12
nadC	-0.29103	3.77312e-06
nadR	0.141561	0.00103716
nagA	-0.0446094	0.909223
nagB	-0.168003	4.25424e-08
nagC	-0.81482	0.745754
nagD	-0.0453527	0.392164
nagE	-0.0108888	0.873512
nagZ	-0.206315	0.00101055
nanA	0.0178169	0.793832
nanE	-0.0293672	0.542698
nanR	-0.0840617	0.0789261
nanT	0.0190628	0.712612
napA	-0.0935043	0.0260921
napB	-0.0676624	0.0871534
napC	-0.0134568	0.844525
napD	-0.0306333	0.615877
napF	-0.0633574	0.365488
napG	-0.053368	0.331601
napH	-0.0417945	0.468966
narG	-0.1605	0.0130564
narH	-0.168088	0.000431251
narJ	-0.154209	0.0125615
narK	-0.139469	0.0972122
narL	-0.139164	0.0268338
narQ	-0.155215	0.00219267
narU	-0.0456446	0.82272
narV	0.0614913	0.541879
narW	0.0278735	0.862707
narX	-0.169936	0.00189978
narY	-0.143251	0.161233
narZ	0.00379675	0.979881
ndh	-0.159928	0.157929
ndk	0.0885782	0.553533
nemA	-0.0754979	0.538144
nfi	-0.134173	0.495963
nfo	0.0272309	0.625589
nfrA	0.0205892	0.87372
nfrB	-0.00651265	0.951988
nfsA	-0.0982693	0.00401401
nhaA	-0.0201662	0.947755
nhaB	-0.256119	1.89231e-07
nhaR	0.022039	0.65672
nhoA	-0.111868	0.193585
nikA	0.0589436	0.331487
nikB	0.039461	0.456778
nikC	0.0497661	0.412775
nikD	0.0545954	0.559982
nikE	-0.0311917	0.607719
nikR	0.0670988	0.291512
ninE	0.146789	0.490862
nirB	0.121345	6.06263e-05
nirC	0.0957423	0.00264704
nirD	0.0727024	0.0477579
nlpA	0.0569048	0.0600486
nlpB	-0.113206	0.00342309
nlpC	-0.0398914	0.799774
nlpD	-0.363162	2.486e-11
nlpE	0.0792775	0.231359
nlpI	-0.219841	0.133198
nmpC	0.195282	0.000107392
norR	0.0581264	0.287912
norV	-0.0302957	0.708063
norW	0.0183123	0.776843
npr	-0.0619938	0.170691
nrdD	-0.0525952	0.38958
nrdE	0.161374	0.0258529
nrdF	0.0687343	0.141235
nrdG	-0.0973392	0.0842774
nrdH	0.157234	0.00219267
nrdI	0.011505	0.891413
nrfA	0.049151	0.143361
nrfB	0.0840015	0.00416861
nrfC	0.075148	0.0114187
nrfD	0.0347976	0.293906
nrfE	0.0243295	0.592438
nrfF	0.101242	0.00354277
nrfG	0.0849757	0.00605387
nth	-0.241337	0.0519882
nudB	-0.384967	0.582012
nudC	0.058191	0.0613276
nudD	-0.0772953	0.0805521
nudF	0.0323908	0.522848
nudG	-0.0156219	0.899648
nudH	-0.0178001	0.981176
nuoA	-0.0712851	0.458769
nuoB	0.0549795	0.548475
nuoC	-0.0932877	0.329843
nuoE	-0.0973144	0.529097
nuoG	-0.035114	0.654612
nuoH	-0.060214	0.4827
nuoI	NA	NA
nuoJ	0.217105	0.23696
nuoM	0.0524684	0.761179
nuoN	-0.0296511	0.753957
nupC	-0.0830552	0.078423
nupG	0.00436944	0.958292
nusB	0.517742	0.35453
ogrK	0.0016624	0.977951
ogt	-0.0178396	0.881151
ompA	-1.04261	5.01193e-05
ompC	-0.213642	0.777048
ompF	0.349397	8.82813e-13
ompG	-0.0443754	0.79536
ompL	0.0780109	0.0309826
ompN	-0.153461	0.318007
ompR	0.769206	0.779557
ompT	-0.0478243	0.557969
ompW	-0.10629	0.0577998
ompX	-0.105627	0.190781
oppB	-0.105886	0.0687781
oppC	-0.00815437	0.943667
oppD	-0.156784	0.000486623
oppF	-0.203351	0.00340126
osmB	0.0282777	0.87186
osmC	-0.079318	0.537041
osmE	-0.0887096	0.435527
osmY	0.018469	0.724961
otsA	-0.0256859	0.839693
otsB	-0.0126561	0.885875
oxc	-0.0683709	0.52646
oxyR	-0.128394	0.736265
paaA	-0.054855	0.346519
paaB	-0.115607	0.0600213
paaC	-0.0638155	0.340529
paaD	-0.110048	0.045313
paaE	0.0785144	0.652434
paaF	-0.0523106	0.291047
paaG	-0.092204	0.285274
paaH	-0.097838	0.128579
paaI	-0.0349042	0.745754
paaJ	0.0902801	0.279467
paaK	-0.213375	0.00691095
paaX	0.0712127	0.544694
paaY	-0.165519	0.270785
pabA	0.0995081	0.00207799
pabB	-0.0979994	0.0530549
pabC	-0.12598	0.0220922
pal	0.135426	0.75198
panB	-0.105526	0.0894421
panC	-0.232655	0.000705859
panD	-0.145674	3.82869e-05
panE	-0.0690972	0.0442189
panF	0.0519294	0.282325
pbl	0.0761653	0.322554
pbpC	-0.0179042	0.717998
pbpG	-0.0280925	0.605411
pck	0.117136	0.00398804
pcm	-0.0471143	0.482636
pcnB	0.0911689	0.226641
pdhR	0.00020762	0.998372
pdxA	-0.840342	4.70749e-17
pdxB	-0.231702	0.776843
pdxJ	-0.818516	0.00263468
pdxK	0.0180566	0.660121
pdxY	-0.0506759	0.891095
pepA	-0.0112113	0.866258
pepB	0.0305212	0.700688
pepD	0.0547528	0.55288
pepE	0.173729	0.000239397
pepN	-0.0638692	0.434495
pepP	-0.00488043	0.951794
pepQ	0.0909264	0.0106747
pepT	-0.364151	1.92499e-19
perR	-0.473757	0.940585
pfkA	-0.561225	9.88608e-06
pfkB	-0.127345	0.0977909
pflA	-0.365671	2.26891e-14
pflB	-0.36111	7.19475e-20
pflC	0.0683521	0.0726106
pflD	0.0778239	0.0399939
pfs	-0.421676	0.866113
pgi	-1.6433	4.2439e-19
pgm	0.0931173	0.626341
pgpA	0.0979974	0.891032
pgpB	-0.140058	0.683078
pheA	-0.0718942	0.425366
pheL	0.0984965	0.0802086
pheP	0.01577	0.781288
phnB	0.120604	0.0130048
phnC	0.131818	9.77946e-06
phnD	0.0816024	0.0060843
phnE	0.125124	0.000312574
phnF	0.0453333	0.401512
phnG	0.10622	0.00166003
phnH	0.122577	2.9092e-05
phnI	0.092709	0.0177657
phnJ	0.135606	0.000416026
phnK	0.139949	0.000324147
phnL	0.148622	1.57399e-07
phnM	0.138186	0.00110081
phnN	0.0395025	0.428909
phnO	0.107534	0.000103952
phnP	0.114513	0.00228241
phoA	-0.00157062	0.97997
phoB	0.00310031	0.94889
phoE	0.0801777	0.106977
phoH	-0.061843	0.178874
phoP	0.130122	0.9423
phoQ	-1.05083	0.85179
phoR	-0.0723777	0.146611
phoU	0.0600889	0.0550911
php	0.0448017	0.284381
phr	-0.0264804	0.694638
pin	0.219032	0.000573585
pinH	-0.0548974	0.618578
pinQ	0.035017	0.90297
pioO	0.0926832	0.0269675
pitA	-0.0961378	0.0480861
pitB	0.0325032	0.499826
pldA	0.115872	0.0589009
pldB	0.138697	0.00537718
plsB	0.32122	0.013231
plsX	-0.0552487	0.111776
pmbA	0.0163076	0.783593
pmrD	-0.0577752	0.282325
pncA	-0.0805145	0.135053
pncB	-0.0709162	0.455909
pnp	0.0474676	0.487465
pntA	-0.0448463	0.693119
pntB	-0.104143	0.401512
pnuC	-0.0529001	0.484974
polA	0.110515	0.101577
polB	-0.00643666	0.942491
potA	-0.132664	0.0583021
potB	-0.130629	0.000648642
potC	-0.176041	0.000313003
potD	-0.189582	7.3178e-06
potE	0.0561788	0.358199
potF	0.0699002	0.447695
potG	0.0168939	0.782927
potH	-0.0456589	0.482636
potI	-0.0968448	0.0889361
poxA	-0.2664	0.000349066
poxB	-0.0494722	0.331601
ppc	-0.601752	8.5667e-28
ppdA	-0.0859051	0.00913629
ppdB	-0.10762	0.00320973
ppdC	-0.0289133	0.529006
ppdD	0.0367096	0.574576
pphA	0.009328	0.933178
pphB	-0.0148349	0.832632
ppiA	0.0899606	0.00300088
ppiB	0.0230327	0.751677
ppiD	-0.125047	0.0353241
ppk	0.0395026	0.953742
pppA	0.019499	0.770791
pps	-0.12555	0.207969
ppx	0.0419188	0.77299
pqiA	0.00255915	0.985699
pqiB	-0.121248	0.111776
pqqL	0.00569327	0.964618
prc	-1.36279	4.68186e-42
prfC	-0.397357	2.97643e-13
prfH	0.0694011	0.169231
priA	0.248763	3.88547e-08
priB	NA	NA
priC	-0.0046652	0.930215
prkB	0.0251782	0.648221
prlC	-0.0379943	0.542222
prmA	0.000174562	0.998071
prmB	-0.102742	0.927803
prmC	NA	NA
proA	0.0606236	0.355291
proB	0.0207432	0.844525
proC	-0.153135	0.574118
proP	0.0363248	0.484781
proQ	-0.706104	1.64586e-78
proV	-0.0729473	0.161512
proW	0.0129993	0.866531
proX	0.0502015	0.448516
proY	-0.0154585	0.744554
prpB	-0.111147	0.100857
prpC	-0.128776	0.153448
prpD	0.0773723	0.162235
prpE	-0.0838292	0.0447139
prpR	-0.124781	0.0619618
psiF	-0.0243754	0.730304
pspA	0.0882677	0.0200531
pspB	0.00699224	0.942082
pspC	-0.0563919	0.280201
pspD	0.20263	0.0600213
pspE	0.0296599	0.756044
pspF	-0.0437149	0.539036
pstA	-0.735423	0.0277903
pstB	0.0828181	0.0721167
pstS	-0.00298275	0.984565
pta	0.0719264	0.928338
ptr	0.00333233	0.954068
ptrB	NA	NA
ptsA	0.0942071	0.000448839
ptsG	-0.646272	5.99947e-68
ptsI	-0.892542	0.262553
ptsN	0.197418	1.06447e-11
ptsP	-0.190854	2.02922e-05
purA	-1.10634	0.398307
purB	NA	NA
purC	-1.3166	0.00795415
purD	-1.16575	0.0101545
purE	-1.45607	0.0986877
purF	-2.91375	0.0107169
purH	-1.30214	0.0133949
purK	-0.831898	0.117291
purL	-1.95328	0.00262568
purM	-1.0193	0.365532
purN	-0.391251	0.0134618
purR	-0.376334	2.69594e-12
purT	0.0126582	0.932599
purU	-0.297293	0.0261607
puuA	-0.0273188	0.716697
puuB	0.0963806	0.13596
puuC	0.0832318	0.49023
puuD	0.00499354	0.951794
puuE	0.041439	0.552892
puuP	-0.0222207	0.751795
puuR	-0.0822532	0.173512
pykA	0.0703075	0.151315
pykF	-0.298077	0.00175899
pyrB	-2.16504	0.538348
pyrC	-1.6543	0.443718
pyrD	-1.86231	0.636818
pyrF	-2.81922	0.0225883
pyrI	0.0595716	0.154484
pyrL	0.0472737	0.44039
qor	0.082122	0.00416861
qseB	0.0767763	0.122244
qseC	-0.35912	5.01193e-05
queA	-0.0507816	0.227695
racC	-0.488907	0.58663
radA	0.120411	0.00194553
rarA	-0.0913516	0.234808
rarD	0.187469	2.05035e-07
rbbA	0.0845137	0.0361562
rbfA	-0.455062	0.72513
rbn	0.0578078	0.215685
rbsA	0.245678	2.0183e-13
rbsB	0.201832	3.32869e-09
rbsC	0.251119	8.38605e-17
rbsD	0.185972	1.14578e-11
rbsK	0.174023	1.51022e-09
rbsR	-0.0110429	0.807018
rcsA	0.0362832	0.752623
rcsD	0.0094285	0.883274
rcsF	-0.0335249	0.53122
rdgC	0.0443118	0.346287
recA	-1.9524	3.53961e-17
recB	-0.482818	0.187116
recC	-0.113255	0.840298
recD	0.198225	1.06863e-07
recE	0.0549834	0.846034
recF	-0.12713	0.00104595
recG	0.438391	5.73409e-43
recJ	-0.201115	2.80424e-12
recN	0.0166051	0.801455
recO	-0.304916	1.52792e-06
recQ	0.0741046	0.0494682
recR	-0.19147	0.0600213
recT	0.0378166	0.745754
recX	0.0972634	0.297793
relA	-0.334515	2.31626e-10
relE	-0.0648459	0.460099
rem	-0.123968	1.54357e-06
renD	0.0262599	0.772109
rep	0.111567	0.774397
rfaB	0.0249721	0.832632
rfaC	NA	NA
rfaD	-0.0786998	0.955923
rfaE	0.0529184	0.986301
rfaF	-0.407318	0.565554
rfaG	0.201179	0.146832
rfaH	0.226839	0.529097
rfaI	0.0154897	0.877723
rfaJ	0.0324191	0.532938
rfaK	0.0408939	0.0976585
rfaL	0.125018	0.00189978
rfaQ	0.124115	0.0200531
rfaS	0.0890324	0.0067037
rfaY	0.147771	0.0478913
rfaZ	0.175389	0.00133088
rfbA	0.0435448	0.732456
rfbB	0.0493546	0.590275
rfbC	-0.0184732	0.872243
rfbD	0.0380202	0.576578
rfbX	0.0454527	0.632307
rfe	0.139927	0.0550911
rffA	-0.157873	0.521642
rffC	0.194933	0.795668
rffD	0.159454	1.17015e-05
rffE	0.217079	2.95634e-05
rffG	0.0871141	0.020919
rffH	0.111753	0.00634203
rffM	0.151979	0.000161433
rffT	0.29792	2.31626e-10
rhaA	0.00358472	0.964618
rhaB	0.134528	0.000510005
rhaD	0.0769901	0.0403535
rhaR	0.165722	0.000651716
rhaS	0.0719974	0.101974
rhaT	0.0567699	0.277407
rhlB	0.159714	1.57567e-05
rhlE	-0.029929	0.65314
rhoL	0.0773729	0.0323378
rhsD	0.0872662	0.659918
rhsE	-0.00802963	0.981176
rhtA	-0.0982289	0.0830785
rhtB	0.146297	2.57703e-05
rhtC	0.103777	0.00111569
rihA	-0.136109	0.479395
rihB	0.0841369	0.227298
rihC	0.0883277	0.00618359
rimI	-0.0212627	0.823328
rimJ	-0.0377218	0.563071
rimK	-0.0189726	0.74801
rimL	0.0772394	0.492615
rimM	NA	NA
rlmB	0.0649768	0.248014
rlpA	-0.0438504	0.582355
rluA	-0.0232047	0.736265
rluB	-0.276563	0.00239066
rluC	-0.0904025	0.49692
rluD	-0.236899	0.000749877
rmf	-0.0700002	0.459496
rmuC	0.0444052	0.249415
rna	0.0540126	0.512213
rnb	-0.362739	8.484e-08
rnc	-0.803352	0.807128
rnd	-0.208172	0.000905117
rng	0.05768	0.526758
rnhA	-0.313942	0.111482
rnhB	0.0560334	0.199591
rnk	0.00758642	0.915
rnr	NA	NA
rnt	-0.149201	0.798775
rob	-0.112781	0.00517563
rof	0.0608148	0.227583
rpe	0.484218	0.482636
rph	0.00589912	0.938254
rpiA	-0.574495	0.64176
rpiB	0.156323	7.81982e-06
rpiR	0.0469846	0.327399
rplD	NA	NA
rplI	-0.450817	6.06692e-05
rplU	NA	NA
rpmA	NA	NA
rpmB	-0.980205	0.433054
rpmE	0.254873	0.0279412
rpmF	-0.414024	0.482636
rpmH	-0.556466	0.859271
rpmI	-3.08769	0.193704
rpmJ	-0.220558	0.881151
rpoD	0.668101	0.351922
rpoS	-0.824944	2.63122e-26
rpoZ	-0.00363195	0.932182
rpsO	-0.106282	0.905286
rpsT	0.21172	0.081976
rpsU	-0.657799	0.37814
rraA	0.028086	0.559817
rrmA	-0.126183	0.0632052
rrmJ	NA	NA
rsd	0.122801	5.97087e-06
rseB	-0.00176871	0.984565
rseC	-0.0147916	0.85179
rsgA	1.25746	0.818429
rsmB	0.0742164	0.0565283
rsmC	0.0616041	0.389426
rspA	-0.0726672	0.302102
rspB	0.0189025	0.923866
rssA	-0.71428	1.21657e-122
rssB	0.270305	0.124276
rstA	-0.183734	0.0676907
rstB	-0.0664428	0.550137
rsuA	-0.142051	0.0389149
rsxA	-0.315502	0.0041407
rsxB	-0.15695	0.37814
rsxC	-0.279882	0.107231
rsxD	-0.299939	0.00666332
rsxE	-0.237708	0.168073
rsxG	-0.289147	0.0149342
rtcA	0.151276	0.0380648
rtcB	0.123347	0.0158775
rtcR	0.122797	0.065176
rtn	0.00885765	0.947773
rumA	-0.0356007	0.531754
rumB	-0.12483	0.000108214
rusA	0.0571135	0.739834
ruvA	-0.824061	1.79655e-29
ruvB	-0.855054	0.00241176
ruvC	-0.935384	1.16522e-05
rzoD	-0.0776339	0.351922
rzpD	-0.0273953	0.839778
sanA	-0.0633009	0.692958
sapA	-0.00666051	0.95884
sapB	-0.0824318	0.302268
sapC	-0.111657	0.0983449
sapD	-0.0819296	0.33179
sapF	-0.0142658	0.915217
sbcB	-0.118735	0.00605387
sbcC	-0.0185372	0.751795
sbcD	0.095555	0.0449805
sbmA	0.0174595	0.678928
sbmC	-0.516366	9.49408e-10
sbp	0.102802	0.00533202
sdaA	-0.149418	0.000228157
sdaB	-0.00642196	0.90096
sdaC	-0.0668738	0.171379
sdhA	NA	NA
sdhB	-0.0501037	0.317304
sdhC	-0.0111377	0.899534
sdhD	-0.00267645	0.957046
sdiA	-0.119253	0.0866396
secB	0.185455	0.0232573
secD	NA	NA
secF	NA	NA
secG	0.00860949	0.981856
selA	0.0697141	0.0585524
selB	0.0101036	0.90096
selD	-0.180826	0.0252912
seqA	-0.431019	0.396984
serA	-0.0804692	0.758486
serB	-0.210705	0.0224494
serC	-0.941882	1.1865e-06
setA	0.0561462	0.145909
setB	-0.0101192	0.908224
setC	0.0691368	0.0257836
sfcA	0.130951	0.185941
sfmA	-0.0915276	0.638939
sfmC	-0.181423	0.0550911
sfmF	-0.0894771	0.197895
sfmH	-0.131661	0.136065
sfsB	0.0509139	0.243552
sgbE	0.0798492	0.0376541
sgbH	0.0690511	0.0218386
sgbU	0.0562777	0.201123
sgcB	-0.0123642	0.866258
sgcC	-0.0105244	0.87624
sgcE	0.0212504	0.752092
sgcQ	-0.0207877	0.752623
sgcR	0.0258023	0.724323
sgcX	-0.00677023	0.941556
sgrR	-0.0147222	0.804959
shiA	0.0339393	0.660273
sieB	0.163529	0.220111
sixA	-0.0101803	0.88668
slp	0.0746938	0.074922
slt	0.0852519	0.00912794
slyA	-0.0838766	0.272727
slyB	-0.184222	0.00630075
slyD	0.145206	0.00473054
slyX	0.076973	0.0517853
smf	0.0504408	0.0779849
smg	0.0837568	0.00132758
smpA	0.196145	0.00187728
smpB	0.755039	0.0229719
smtA	0.0661141	0.214004
sodA	0.0761341	0.0687781
sodB	-0.0917411	0.389485
sodC	-0.138204	0.0916417
sohA	0.103365	0.841866
sohB	-0.262043	4.61519e-05
solA	-0.15982	0.0312073
soxR	0.138438	6.84719e-05
soxS	0.102946	0.0014904
speA	0.0629875	0.230601
speB	-0.106312	0.354072
speC	0.0237793	0.640966
speD	-0.295624	1.64679e-19
speE	-0.388901	0.00533387
speF	-0.0307436	0.605411
speG	0.180803	0.340404
sppA	-0.185803	0.00263468
spr	0.274005	3.9696e-06
sprT	-0.015156	0.917412
spy	-0.0663676	0.280267
sra	-0.0062895	0.973532
srlA	-0.0212917	0.832632
srlB	0.00518276	0.941448
srlD	0.0733103	0.260273
srlE	0.0167064	0.844525
srlR	-0.0148829	0.843359
srmB	-0.389674	0.00320702
sseA	0.075276	0.264703
sseB	0.0746295	0.2238
ssnA	0.0265259	0.530097
sspA	-0.413649	6.75825e-26
sspB	-0.0304485	0.405831
sstT	0.0628185	0.359599
ssuB	-0.0919764	0.30329
ssuC	-0.0139084	0.848099
ssuD	-0.0557321	0.30086
ssuE	-0.0378303	0.570967
stfE	0.271837	0.0036128
stfQ	-0.138636	0.514985
stfR	0.0418599	0.608897
sthA	0.0919896	6.72401e-05
stpA	0.00712597	0.934207
sucB	-0.07534	0.0869275
sucC	-0.153091	0.00208645
sucD	-0.0954493	0.145909
sufA	-0.125983	0.232041
sufB	-0.183742	4.7588e-06
sufC	-0.149168	0.0115517
sufD	-0.183574	0.03986
sufE	-0.155463	0.00183072
sufI	0.0902702	0.0135933
sufS	-0.102145	0.07886
sulA	-0.358889	0.00692256
surA	-0.103575	0.880114
surE	0.00663277	0.942714
syd	-0.0194895	0.802007
tag	0.0772146	0.0140398
talA	-0.0224258	0.684174
talB	-0.0182868	0.75431
tam	-0.174062	0.170242
tap	-0.0169491	0.843234
tar	-0.0363587	0.658173
tas	0.00902272	0.842349
tatA	0.138352	3.97526e-07
tatB	0.944335	0.15163
tatE	0.00958238	0.921677
tauA	-0.0120339	0.885527
tauB	0.0375474	0.545316
tauC	-0.00514538	0.934934
tauD	-0.07986	0.0827262
tbpA	-0.0284243	0.793578
tdcA	-0.116811	0.105994
tdcB	-0.120405	0.356173
tdcC	0.0660586	0.169522
tdcF	0.0530095	0.159146
tdcG	0.0601355	0.188573
tdcR	0.0718123	0.167517
tdh	-0.0217328	0.662681
tdk	-0.176235	0.0215752
tehA	0.0204035	0.867883
tehB	0.0110028	0.947755
tesA	0.0046528	0.951141
tesB	-0.0524932	0.351449
tfaD	-0.00766304	0.934934
tfaE	0.287507	1.16967e-06
tfaS	-0.0835405	0.295342
tgt	-0.114175	0.0424383
thiC	0.138156	2.97278e-07
thiD	-0.147598	0.0184436
thiE	-0.0030288	0.956892
thiF	-0.00370515	0.946332
thiG	0.026211	0.494431
thiH	0.019608	0.62448
thiI	-0.148282	0.0125615
thiM	-0.0315573	0.87186
thiP	-0.00522364	0.941556
thiQ	0.00184338	0.981176
thiS	0.0332699	0.401008
thrA	0.0416897	0.340404
thrB	0.0860899	0.0714401
thrC	0.0796268	0.0436775
thrL	0.15735	3.89565e-05
tiaE	0.121378	0.0013822
tig	-0.0177501	0.77822
tktB	0.00358162	0.936606
tldD	0.0433038	0.18561
tolA	-0.62262	0.301317
tolB	-0.296442	0.789699
tolC	NA	NA
tolQ	-0.521664	0.0901065
tolR	-0.735864	0.317432
tonB	-0.220932	0.00106738
topB	-0.0323328	0.769546
torA	-0.120205	0.000477603
torC	-0.0916837	0.150428
torD	NA	NA
torI	-0.107237	0.0891824
torR	-0.0964339	0.100765
torS	-0.169205	0.00351686
torT	-0.0584182	0.763829
torY	-0.0768238	0.135087
torZ	0.00431778	0.948483
tpiA	-1.70262	0.649058
tpr	-0.22037	0.076812
treA	-0.11805	0.0930108
treB	0.089873	0.0132512
treC	0.137106	0.0297614
treF	0.0716495	0.164703
treR	0.095127	0.0386954
trg	-0.0693308	0.419624
trkA	0.166278	0.0328157
trkD	0.165901	0.00234577
trkG	0.0196359	0.802007
trkH	0.181615	3.1365e-06
trmA	0.126058	1.08379e-05
trmC	0.0506524	0.41889
trmE	-0.589818	0.236861
trmH	0.138968	1.44705e-06
trmU	-0.326439	0.557372
trpA	-1.80185	1.49944e-10
trpB	-1.98987	0.00984419
trpC	-0.585566	1.13126e-20
trpD	-0.234553	0.0896872
trpE	-1.07356	2.64651e-08
trpL	-0.230851	0.00041898
trpR	0.104294	0.0183181
truA	-0.237298	0.523374
truB	0.0925356	0.0457932
truD	-0.0390266	0.5612
trxA	0.0674302	0.457217
trxB	-0.159192	0.0353241
trxC	-0.0345952	0.562509
tsgA	0.0473452	0.439813
tsr	0.126837	0.0278549
ttdA	0.128069	0.0215752
ttdB	0.135298	0.000182672
tus	0.306165	0.00975324
tynA	-0.0240068	0.744358
tyrA	0.0380996	0.41846
tyrB	0.0534634	0.234107
tyrP	0.0246036	0.82272
tyrR	-0.298667	3.14151e-07
ubiB	-0.389337	0.771689
ubiC	0.143066	2.19227e-05
ubiD	-0.0109169	0.879708
ubiF	-0.304389	0.628229
ubiG	0.0136415	0.872243
ubiH	1.48772	0.686675
ubiX	-2.8778	0.251864
ucpA	0.0128472	0.783114
udk	-0.0390598	0.585438
udp	0.100169	0.0286527
ugd	-0.0810886	0.559247
ugpA	0.000149153	0.998608
ugpB	0.0606309	0.19901
ugpC	0.120592	0.000872239
ugpE	0.132388	0.000120355
ugpQ	0.103818	0.00424331
uhpA	0.0410577	0.164703
uhpB	0.0768308	0.02227
uhpC	0.0870246	0.00401401
uhpT	0.115887	0.00247391
uidA	-0.258124	0.100747
uidB	-0.107664	0.514231
uidC	-0.0979917	0.362759
ulaA	0.1222	0.000733218
ulaB	0.0822681	0.0275086
ulaC	0.11337	0.017932
ulaD	0.0567258	0.0546656
ulaE	0.0200789	0.821048
ulaF	0.0807724	0.0269466
ulaG	0.121517	0.000401861
ulaR	-0.0233553	0.798775
umuC	-0.319609	1.1626e-07
umuD	-0.247052	3.48736e-07
ung	0.0256645	0.686818
upp	0.00229426	0.981176
uraA	0.0253715	0.779387
usg	-0.0176196	0.798775
ushA	-0.0195194	0.686675
uspA	0.07859	0.137586
uspE	-0.0786212	0.268684
uspF	-0.0290321	0.832632
uspG	-0.0513117	0.424122
uup	-0.410811	1.57241e-06
uvrA	-0.211481	9.17272e-08
uvrB	-0.722482	9.28359e-47
uvrC	-0.16628	0.013231
uvrD	NA	NA
uvrY	-0.224968	0.036455
uxaA	0.0533767	0.0751631
uxaB	-0.0412488	0.648286
uxaC	0.0705779	0.0144464
uxuA	-0.028032	0.661769
uxuB	0.680384	0.909223
uxuR	-0.0813053	0.23696
vacJ	-0.0174393	0.913145
visC	0.079197	0.529752
vsr	-0.0720336	0.448823
wbbH	0.0274546	0.864856
wbbI	0.0361334	0.818305
wbbJ	0.171495	0.202841
wbbK	0.169684	0.059724
wcaA	-0.00376915	0.959518
wcaB	-0.11137	0.0317236
wcaC	-0.0609966	0.0615516
wcaD	-0.0370832	0.472048
wcaE	-0.0605224	0.631226
wcaF	-0.00643282	0.925554
wcaI	-0.0378066	0.646348
wcaJ	-0.0053567	0.954572
wcaK	0.0508566	0.572477
wcaL	-0.0172224	0.863491
wcaM	NA	NA
wrbA	-0.213407	0.00057158
wza	-0.0854871	0.347965
wzb	-0.0851381	0.271124
wzc	-0.0833706	0.226246
wzxC	-0.023734	0.674629
wzxE	0.402109	0.875665
wzzE	0.167704	0.00187728
xapA	-0.117382	0.21215
xapB	-0.0282489	0.56724
xapR	-0.000762844	0.990588
xdhA	0.0920088	0.684548
[truncated: 1,681 more rows]

## Sheet: 48h_1_to_1
strain	log2(fold-change)	adjusted p-value
aaeA	0.0119537	0.852163
aaeB	0.0165606	0.536101
aaeR	0.0146826	0.689923
aaeX	0.0670379	0.180884
aas	-0.014857	0.670011
aat	-0.127069	0.000579784
abgA	0.0339685	0.817412
abgB	-0.121434	0.597929
abgR	-0.0186123	0.814905
abgT	-0.0275228	0.789576
abrB	-0.0451638	0.587719
aceA	0.0829347	0.00196033
aceB	0.021986	0.62533
aceE	NA	NA
aceF	0.0433707	0.942738
aceK	0.0810727	0.00655845
ackA	-0.123725	0.895929
acnA	-0.180737	0.000210623
acnB	-0.01769	0.749344
acpT	0.105948	0.0195504
acrA	0.00431773	0.998135
acrB	-0.565736	0.322826
acrD	0.00944714	0.787593
acrE	-0.0413069	0.373758
acrF	0.111514	2.58127e-06
acrR	-0.0036753	0.949049
acs	0.0801429	0.00162942
actP	0.0940706	0.000126168
ada	0.0107405	0.80593
add	-0.191352	0.0178882
ade	0.0815285	0.00012683
adhE	-0.474025	0.000101065
adhP	-0.0224821	0.780914
adiA	0.132487	0.00273125
adiC	0.0810454	0.0499909
adiY	0.077788	0.129051
aegA	-0.0444885	0.172998
aer	0.0232784	0.389534
aes	0.0364478	0.327558
afuB	0.3863	0.0109227
afuC	0.432894	0.00719416
agaA	0.0349688	0.814905
agaB	0.0436211	0.487157
agaD	0.0619161	0.167804
agaI	0.0709371	0.110041
agaR	-0.0652726	0.135953
agaS	0.0404455	0.333107
agaV	0.0121737	0.79123
agaW	0.0297575	0.410137
agp	-0.0922323	0.00242702
ahpF	0.0027106	0.972787
aidB	0.0913483	0.00598691
ais	-0.0307815	0.349053
aldB	0.0921504	2.5726e-06
alkA	-0.0345449	0.584358
alkB	-0.058013	0.213813
allA	0.012478	0.727326
allB	0.0541226	0.594199
allC	-0.0224008	0.815523
allD	-0.0250494	0.766351
allR	0.000542307	0.992717
alpA	-0.073962	0.371394
alr	0.0564162	0.0626438
alsA	0.109475	0.000398104
alsB	0.0818085	0.00427761
alsC	0.134143	5.63118e-07
alsE	0.11046	2.9546e-05
alx	-0.015415	0.690337
amiA	0.0617357	0.0938014
amiB	0.0548853	0.0494191
amn	-0.0842701	0.656294
ampD	0.204201	7.32079e-06
ampE	0.0426078	0.534447
ampG	-0.00752358	0.874973
ampH	0.0242163	0.620779
amtB	0.00893594	0.87972
amyA	-0.06366	0.185568
ansA	-0.0558162	0.493746
ansB	0.0411788	0.311513
ansP	-0.0429741	0.541496
apaG	0.171859	2.52724e-52
apaH	-0.535232	5.24077e-07
aphA	0.121445	0.000235869
appA	-0.0819308	0.227113
appB	-0.0462067	0.263331
appC	-0.088997	0.0449627
apt	0.0328149	0.458094
aqpZ	-0.0618052	0.0109314
araA	NA	NA
araB	NA	NA
araC	0.0301369	0.4598
araE	0.0419019	0.306115
araF	-0.0185369	0.882376
araG	-0.0574652	0.417151
araH	-0.0127942	0.87597
araJ	0.089187	0.000480399
arcA	0.389109	0.865614
arcB	-0.13307	0.449568
argA	-0.0355029	0.202542
argB	0.0576395	0.00274994
argC	0.0244534	0.285721
argD	NA	NA
argE	0.0741619	0.00656022
argF	0.461438	0.0232335
argG	0.0677605	0.00723814
argH	0.100352	1.44248e-06
argO	-0.119027	0.0714694
argP	0.0565582	0.244297
argT	0.0052681	0.961861
arnT	-0.0280365	0.484666
aroA	-0.200483	5.57327e-06
aroB	0.0415171	0.493732
aroC	-0.0849279	0.123837
aroD	-0.281855	0.0928691
aroE	NA	NA
aroF	0.0300505	0.371596
aroG	-0.0688324	0.237542
aroH	-0.145991	0.260719
aroL	-0.0569445	0.265756
aroM	0.0739782	0.148674
aroP	0.0391956	0.563007
arpA	0.0298454	0.409466
arsB	0.0345569	0.438839
arsC	0.157346	4.28576e-07
arsR	0.055825	0.192864
artI	-0.057972	0.19537
artJ	-0.0578669	0.0724445
artM	-0.0443539	0.215954
artP	-0.0426733	0.375187
artQ	-0.105816	0.0056236
ascB	0.0107696	0.895946
ascF	0.076504	0.293895
ascG	0.0676265	0.195682
aslA	0.0649377	0.0435716
aslB	0.125977	0.000208191
asmA	-0.0432358	0.832965
asnA	0.0680106	0.025526
asnB	-0.0790193	0.00799633
asnC	0.0841754	0.00656022
aspA	0.0270607	0.780914
aspC	-0.0146441	0.956811
asr	-0.140094	0.00762128
astA	-0.0911267	0.00378069
astB	-0.117166	0.00983743
astC	-0.0455954	0.38886
astD	-0.093697	0.322688
astE	-0.0083942	0.958361
atoA	-0.0528891	0.18399
atoB	-0.0291088	0.409585
atoC	-0.0187315	0.700449
atoD	-0.053436	0.303095
atoE	0.0107837	0.787675
atoS	0.016441	0.780914
atpA	-1.10482	2.61806e-31
atpB	-1.09647	4.11258e-59
atpC	-1.16632	1.22878e-30
atpE	-1.09233	7.92637e-38
atpF	-1.07966	4.07945e-17
atpG	-1.09439	1.7064e-08
atpI	0.0310493	0.42815
avtA	0.0998343	0.0139358
azoR	-0.0770093	0.411692
bacA	0.0248408	0.410841
baeR	-0.0618359	0.202191
baeS	-0.0754393	0.270784
barA	-0.110122	3.56271e-05
basR	0.0117852	0.832965
basS	0.116248	0.00762128
bax	0.0710675	0.0155477
bcp	-0.0738871	0.0853868
bcr	0.0109799	0.854173
bcsA	0.0266655	0.426492
bcsB	0.0718563	0.0254777
bcsC	0.0434257	0.293614
bcsE	0.0864458	0.0538545
bcsF	0.0778043	0.0270906
bcsG	0.0910063	0.00108056
bcsZ	0.0541377	0.112996
bdm	-0.0532671	0.493732
betA	0.0177295	0.748793
betB	0.00799682	0.933808
betI	0.023483	0.610794
betT	0.0635464	0.0963289
bglA	-0.022167	0.69353
bglB	0.091554	0.00538227
bglF	0.112764	0.000195341
bglG	-0.0205929	0.695335
bglH	0.022604	0.63402
bglX	0.00652766	0.938586
bioA	-0.0986774	0.168877
bioB	-0.0020847	0.995301
bioC	-0.106084	0.102096
bioD	-0.176376	0.0365448
bioF	-0.0849596	0.231616
bioH	0.0603513	0.297843
bipA	0.09093	0.492177
blr	-0.102876	0.296841
bolA	0.0320042	0.410313
brnQ	-0.0181517	0.695394
btuB	0.0771396	0.00141126
btuC	-0.0570932	0.594919
btuD	-0.267553	0.0152669
btuE	-0.105013	0.164779
btuF	-0.0104749	0.874973
btuR	-0.167917	0.000503701
cadA	0.0104205	0.806039
cadB	0.0923674	0.18715
cadC	0.0581376	0.364195
caiA	0.0308028	0.182934
caiB	0.0373139	0.0928691
caiC	0.0193731	0.521716
caiD	0.0053703	0.881987
caiE	-0.205804	0.970257
caiF	-0.00949599	0.815854
caiT	-0.0427227	0.293614
carA	-0.00074132	0.999398
carB	-0.606727	0.809036
cbl	0.0638512	0.583177
cbpA	-0.112269	0.00230363
cbpM	0.0178434	0.689923
cbrA	0.0321417	0.0955108
cbrC	0.0598804	0.129101
cchA	0.0378736	0.265756
cchB	-0.0705123	0.00184192
ccmA	0.00877239	0.897269
ccmB	-0.0345804	0.39437
ccmC	0.0586747	0.251398
ccmD	0.000288455	0.99793
ccmE	-0.0644602	0.158243
ccmF	0.00682074	0.937258
ccmG	-0.0690758	0.342285
ccmH	-0.0564285	0.0914894
cdaR	-0.0334106	0.340175
cdh	0.0683175	0.00425702
cedA	-0.141231	0.012412
cfa	-0.310676	1.30719e-09
chaA	-0.143608	0.071501
chaB	-0.14483	0.0284732
chbA	-0.0284224	0.794423
chbC	-0.136647	0.0506745
chbF	0.00121834	0.995301
chbG	-0.0661321	0.303621
chbR	-0.100951	0.310375
cheA	-0.0645257	0.330509
cheB	-0.0213752	0.738986
cheR	-0.155376	5.9677e-07
cheW	-0.0574346	0.428355
cheY	-0.111843	0.00353341
cheZ	-0.0748269	0.189164
chiA	0.028848	0.569759
chpB	0.0558463	0.18766
chpR	0.0595478	0.179195
chpS	0.101129	0.790653
cirA	-0.0606805	0.141545
citA	-0.0236486	0.790653
citB	0.0327411	0.630897
citC	-0.0524453	0.749344
citD	-0.0265307	0.868603
citE	0.2093	0.134419
citF	-0.0259903	0.421043
citG	-0.0506518	0.105213
citT	0.00300737	0.965047
citX	0.0200032	0.756837
clcA	0.0415038	0.641266
clcB	-0.134653	0.14866
cld	-0.0143963	0.727458
clpA	-0.151066	8.72722e-08
clpB	-0.0619851	0.183058
clpP	0.208382	0.159616
clpS	-0.0580274	0.270062
clpX	0.253841	0.124452
cls	-0.167562	0.0718044
cmk	-1.28561	0.665587
cmr	-0.0594688	0.072295
cmtA	0.0164795	0.817128
cmtB	0.0408381	0.641458
coaE	NA	NA
cobB	-0.102137	0.0829705
cobC	-0.0258066	0.776577
cobS	-0.120403	0.00115066
cobT	-0.0749693	0.387523
cobU	-0.0760659	0.20702
codA	0.0215171	0.561684
codB	0.00857732	0.884549
cof	0.0181145	0.546741
copA	-0.0406646	0.107444
corA	0.00762249	0.918888
cpdA	-0.0301532	0.405902
cpdB	0.0870071	0.000237335
cpsB	-0.0564507	0.350457
cpxA	-0.630941	2.0247e-38
cpxP	0.0690576	0.0824093
cpxR	0.204507	1.85884e-16
crcA	-0.065373	0.203282
crcB	0.0205555	0.689923
creA	0.0165855	0.565551
creB	0.0183152	0.725815
creC	0.038893	0.227761
creD	0.0148084	0.730526
crl	-0.00156761	0.987909
crp	NA	NA
crr	-0.0698078	0.731304
csdA	0.0505177	0.0552873
csgA	-0.032826	0.808899
csgB	-0.0168109	0.813383
csgD	-0.0808212	0.216927
csgE	-0.122087	0.012929
csgF	-0.23734	0.0210589
csiE	-0.0583936	0.533859
csiR	0.0243659	0.62827
cspA	0.00987702	0.801994
cspB	-0.0920905	0.525608
cspC	-0.268904	5.24052e-21
cspD	-0.0158585	0.658147
cspE	-0.0950757	0.00635704
cspF	-0.0530371	0.731735
cspG	-0.171746	0.0336478
cspH	-0.056039	0.419331
cspI	-0.236653	0.074958
cstA	-0.0580728	0.234541
cueO	0.0235282	0.589318
cueR	-0.00993036	0.801994
cusA	0.0298985	0.306654
cusB	-0.0209777	0.586361
cusC	0.1947	1.53085e-13
cusR	0.0215032	0.752434
cusS	0.0732489	0.00444467
cutA	0.100287	0.0188281
cutC	-0.0700588	0.579109
cvpA	-0.118775	0.266578
cvrA	-0.120181	0.00146619
cyaA	0.0319404	0.762208
cyaY	0.0956185	0.00804954
cybB	-0.00648345	0.970826
cybC	0.0569407	0.0357265
cycA	-0.0416269	0.287153
cynR	0.051052	0.347882
cynS	0.0215095	0.636336
cynT	-0.00823996	0.884549
cynX	0.0643817	0.0810625
cyoA	-0.03449	0.128696
cyoB	0.0276512	0.433299
cyoC	0.0265568	0.191754
cyoD	-0.0109336	0.646895
cyoE	0.0407224	0.0391792
cysA	-0.08498	0.00991006
cysB	-1.42186	4.56855e-05
cysC	-0.138539	0.0295774
cysD	-0.150726	0.0137863
cysE	0.371263	0.955306
cysG	-0.201112	0.00262838
cysH	-0.306125	0.00946003
cysI	-0.327974	9.36007e-08
cysJ	-0.240706	1.61414e-07
cysK	-0.191579	0.0823236
cysN	-0.123094	0.0067462
cysP	-0.100962	0.000730505
cysQ	-0.210218	0.355273
cysU	-0.160296	5.85871e-09
cysW	-0.176561	3.24187e-06
cysZ	0.00207152	0.970083
cytR	0.105324	0.00316483
dacA	0.152274	0.193204
dacB	0.0510638	0.179219
dacD	-0.0538005	0.360436
dadA	-0.147823	1.2472e-05
dadX	-0.130579	9.18824e-05
dam	-0.0507434	0.799306
damX	0.136483	0.000205321
dapF	NA	NA
dbpA	-0.00351489	0.967117
dcd	-0.214379	8.50864e-44
dcm	-0.0602762	0.291765
dcp	-0.00895142	0.949489
dcrB	0.0606637	0.211112
dctA	0.0318593	0.454887
dcuA	0.0521049	0.116023
dcuB	0.0668693	0.0336491
dcuD	0.0355526	0.168877
dcuR	0.0486068	0.0968215
dcuS	0.266236	0.0124045
ddg	-0.00449671	0.954958
ddlA	-7.03316e-05	0.998848
ddlB	0.0630596	0.0788096
ddpA	-0.00111172	0.995301
ddpB	-0.0238527	0.840384
ddpC	0.0166136	0.895192
ddpD	-0.0218596	0.824837
ddpF	-0.0146	0.923112
ddpX	0.0127611	0.958481
deaD	-0.182093	0.0031083
dedA	0.0224814	0.794423
dedD	0.0495823	0.542956
def	0.063347	0.0298946
degP	-0.0955575	0.32746
degQ	0.0386806	0.194144
degS	NA	NA
deoA	0.0363047	0.295128
deoB	0.0843216	0.0025943
deoC	0.0373235	0.24934
deoD	0.0231011	0.285383
deoR	-0.117264	0.231921
dgkA	0.0334653	0.823937
dgoA	0.0554207	0.235938
dgoD	0.109094	0.0176002
dgoK	0.0784904	0.152778
dgoR	0.105968	0.000172574
dgoT	0.0255592	0.152565
dgsA	0.0179426	0.887515
dgt	0.0559839	0.19077
dhaH	-0.16752	6.33593e-08
dhaK	-0.0665736	0.0928691
dhaL	-0.0559958	0.25357
dhaR	-0.179267	4.1849e-08
dicB	0.000128094	0.998885
dicC	-0.110714	0.497686
dinB	0.04246	0.384349
dinD	0.0278877	0.216869
dinF	0.0553342	0.0324629
dinG	-0.000423584	0.997639
dinI	-0.111181	0.536008
dinJ	0.133765	0.0126874
dipZ	-0.0197952	0.841329
djlA	0.0635034	0.00128805
djlB	-0.0712115	0.258105
djlC	-0.0202941	0.733376
dkgA	0.024912	0.663285
dkgB	-0.00686782	0.938006
dksA	-0.706286	0.509763
dld	0.0192099	0.727115
dmsA	-0.0779014	0.000108573
dmsB	-0.0646018	0.00242702
dmsC	-0.0376153	0.420844
dmsD	-0.0801282	0.202378
dnaB	0.354246	2.92093e-05
dnaJ	-0.177254	0.0623726
dnaK	NA	NA
dnaQ	0.300246	0.901333
dos	0.266935	0.119901
dppA	0.096041	0.0625925
dppB	0.0595761	0.073571
dppC	0.0180387	0.602119
dppD	0.063948	0.0308009
dppF	0.066949	0.0824093
dps	-0.0994827	0.17173
dsbB	-0.516152	0.000183866
dsbC	0.022566	0.417151
dsbG	-0.0356179	0.454889
dsdA	0.0937658	0.0996761
dsdC	-0.071457	0.326584
dsdX	-0.0306705	0.541752
dsrB	-0.0168362	0.791949
dtd	0.0436914	0.146345
dusB	0.119674	0.000107911
dusC	0.142888	0.508668
eaeH	0.0499982	0.4598
eamA	0.00578192	0.967711
ebgA	-0.0511345	0.22321
ebgC	-0.0309608	0.350337
ebgR	-0.170076	0.00161907
eco	-0.0289339	0.601659
ecpD	0.0613002	0.409585
eda	0.0101296	0.915728
edd	-0.11045	0.0474259
ego	-0.0822863	0.471058
elaA	-0.0190003	0.689923
elaB	-0.0639227	0.3265
elaC	0.0390445	0.325573
elaD	-0.0431126	0.170703
elbA	-0.119713	0.00398515
elbB	NA	NA
emrA	0.00642676	0.871094
emrB	-0.0487113	0.591055
emrD	0.0957278	4.40684e-09
emrE	0.0182781	0.856701
emrK	0.00841636	0.965047
emrY	-0.047467	0.477088
emtA	-0.106434	0.00231405
endA	0.0566061	0.0727714
entA	0.0199961	0.798539
entB	0.000916288	0.995124
entC	-0.0447996	0.264629
entD	0.00232276	0.975401
entE	-0.00229478	0.970514
entF	-0.0196563	0.838835
envC	0.353454	0.096092
envR	0.0439274	0.259907
envY	-0.0447782	0.373758
envZ	0.149356	0.646593
epd	0.0519055	0.315674
eptA	0.0307507	0.590422
eptB	0.0604024	0.0102736
erfK	-0.0293874	0.727326
essD	-0.00499565	0.962391
etp	-0.0425914	0.646098
eutA	-0.0489642	0.029703
eutB	-0.0610695	0.0687495
eutC	-0.0215289	0.497686
eutE	0.040477	0.267872
eutG	-0.026551	0.401814
eutH	-0.00101884	0.990893
eutI	-0.0722391	6.39262e-05
eutJ	-0.0136927	0.695592
eutL	-0.0352791	0.22375
eutP	0.0608601	0.124206
eutQ	-0.0211297	0.436595
eutT	0.0251334	0.350682
evgA	-0.0663442	0.564237
evgS	0.0473511	0.490144
exbB	0.0783579	0.0862449
exbD	0.0449089	0.386802
exo	0.0390489	0.138082
exoX	-0.0765799	0.226575
exuR	-0.00726966	0.895826
exuT	0.0884882	0.00206607
fabF	-0.0632864	0.0788096
fabH	-0.205801	0.958957
fabR	0.313848	0.000226347
fadA	0.108644	0.000158506
fadB	0.0843866	0.0175084
fadD	-0.064417	0.130865
fadE	-0.00818057	0.839018
fadH	-0.0923113	0.146897
fadL	-0.0243861	0.620512
fadR	-0.147157	1.56918e-09
fbaB	-0.0384107	0.709928
fbp	0.0543887	0.463102
fcl	-0.0884413	0.00427761
fdhD	0.051034	0.290431
fdhE	0.0611427	0.0271654
fdhF	0.0221329	0.650743
fdnG	0.0203152	0.801406
fdnH	0.0128146	0.881988
fdnI	-0.0526844	0.39437
fdoG	0.0495365	0.0688731
fdoI	0.118372	0.00656022
fdrA	0.000689829	0.995301
fdx	-0.133908	0.420844
feaB	-0.0252777	0.642807
feaR	-0.0520814	0.559497
fecA	0.0153575	0.643797
fecB	0.0746775	0.0109227
fecC	0.0502072	0.291765
fecD	0.0914282	0.0162747
fecE	0.0808236	0.00861095
fecI	0.0204417	0.598023
fecR	0.0363305	0.349053
feoA	0.0882782	0.163186
feoB	0.0701341	0.428355
fepA	-0.0132817	0.782777
fepB	NA	NA
fepD	NA	NA
fepE	0.047954	0.452728
fepG	-0.00471617	0.982529
fhiA	0.0481066	0.155143
fhlA	0.0436779	0.395459
fhuA	-0.0223089	0.817128
fhuB	0.056017	0.345114
fhuC	0.0573029	0.0814996
fhuD	0.0268359	0.557025
fhuE	-0.0662479	0.00870058
fhuF	0.00556931	0.9298
fic	-0.0128268	0.727115
fieF	0.014249	0.832965
fimA	0.100127	0.00148989
fimB	0.0347222	0.481888
fimC	0.0335323	0.458094
fimE	0.013311	0.857503
fimF	0.03014	0.52027
fimG	0.0625588	0.153705
fimH	0.0624703	0.0784744
fimI	0.0910347	0.0763319
fimZ	0.00473471	0.972685
fis	-0.0652043	0.319862
fiu	0.0415009	0.372752
fixA	-0.0165306	0.605565
fixB	-0.0219856	0.412561
fixC	0.0688529	0.0486958
fixX	0.00559361	0.928603
fklB	0.0442443	0.418995
fkpA	0.0919048	0.00449992
fkpB	0.0781555	0.000689477
fldB	-0.0649839	0.0952955
flgB	-0.134563	0.0106377
flgC	-0.111767	0.00427698
flgD	-0.116091	0.000159706
flgE	-0.109927	9.40468e-05
flgF	-0.0877987	0.00395012
flgG	-0.0256427	0.658651
flgH	-0.0855467	0.0178254
flgI	-0.142015	0.000415219
flgJ	-0.186175	0.0010507
flgK	-0.162183	0.000128467
flgL	-0.152112	0.0264773
flgN	-0.0630501	0.0264148
flhA	-0.0199436	0.78254
flhB	0.00822477	0.938006
flhE	-0.0763361	0.392664
fliA	0.0492284	0.713136
fliC	-0.0364543	0.672991
fliD	-0.0511803	0.706311
fliE	-0.0430864	0.708507
fliF	-0.106328	0.272612
fliG	-0.0817107	0.173112
fliH	-0.0684135	0.23377
fliI	-0.0114207	0.935873
fliJ	-0.0637405	0.8131
fliK	-0.0998846	0.278049
fliL	-0.0489654	0.75194
fliM	-0.0975227	0.153305
fliN	-0.0955676	0.165931
fliO	-0.0548446	0.623143
fliP	-0.0804192	0.34584
fliQ	-0.0403915	0.541067
fliR	-0.110095	0.327546
fliS	-0.00072538	0.99793
fliT	-0.0117062	0.905842
fliY	-0.0613748	0.215131
fliZ	0.00849024	0.916335
flk	-0.00994972	0.905571
flu	0.0255829	0.730926
flxA	-0.149578	2.04717e-05
fnr	-0.125885	0.503761
focA	-0.184976	0.135953
focB	-0.0929737	0.231816
folA	NA	NA
folB	NA	NA
folC	NA	NA
folE	NA	NA
folK	NA	NA
folM	-0.176386	0.0542551
folX	-0.0313671	0.743718
fpr	0.0794004	0.00171675
frc	0.105408	0.254728
frdA	0.0216604	0.709461
fre	0.100362	0.00613977
frlA	0.0177167	0.842296
frlB	0.0466798	0.193143
frlC	0.056602	0.0685094
frlD	0.0746983	0.00135125
frlR	0.0422652	0.456465
frmA	0.00525933	0.926479
frmB	0.0675492	0.130612
frmR	0.0288298	0.538299
frsA	-0.273302	0.0247924
fruA	0.00414027	0.944718
fruB	-0.064896	0.266136
fruK	-0.136674	0.00963838
fruR	-0.0358305	0.82409
frvA	0.0529044	0.119886
frvB	0.0327797	0.332684
frvX	0.0613711	0.040954
frwB	0.0801913	0.000171583
frwC	0.057172	0.0130834
frwD	0.0489716	0.0615971
fsaA	-0.0137475	0.797415
fsaB	0.070243	0.00197571
fsr	0.0711468	0.00870058
ftn	-0.171455	0.348599
ftsB	-0.925498	0.493732
ftsE	0.283938	0.0950325
ftsN	0.133853	0.298286
ftsX	0.226094	0.0788096
fucA	0.0437598	0.0715636
fucI	0.007472	0.825816
fucK	0.0120183	0.75327
fucO	0.0463311	0.0906288
fucP	-0.0384545	0.246909
fucR	-0.0170875	0.643888
fucU	-0.00384226	0.920812
fumA	-0.115294	0.0968493
fumB	0.045787	0.163324
fumC	-0.127317	0.0167395
fur	0.220926	0.389638
fxsA	0.0504174	0.380056
gabD	-0.0717601	0.185748
gabP	0.0181042	0.840384
gabT	-0.0212879	0.554976
gadC	-0.0253138	0.756883
gadE	-0.0592021	0.0430186
gadW	0.132961	3.08163e-06
gadX	0.12252	7.62267e-07
galE	-0.128686	0.0119372
galF	-0.029854	0.656294
galK	-0.0821068	0.292876
galM	-0.0261191	0.731304
galR	-0.0113954	0.70588
galS	0.061373	0.355273
galT	-0.146855	9.11077e-05
galU	-0.782877	0.825759
gapA	-0.0861397	0.18081
garD	-0.0406957	0.452011
garK	0.0664684	0.111093
garL	0.00698622	0.895308
garP	0.0479529	0.136026
garR	0.0311467	0.675492
gatC	-0.0435873	0.163186
gatD	0.016747	0.752651
gatY	-0.114914	0.136026
gatZ	-0.0201814	0.709928
gcd	0.0874039	0.0560847
gcl	-0.0120031	0.733376
gcvA	-0.0262272	0.815854
gcvH	0.18183	0.290213
gcvP	0.109574	0.278049
gcvR	-0.25987	1.31215e-07
gcvT	0.0730024	0.480156
gdhA	-0.0453438	0.452994
ggt	0.150803	4.99945e-07
gidA	0.215174	0.709461
gidB	0.143841	0.0896796
glcB	0.028547	0.423914
glcC	0.0461508	0.347472
glcD	0.0202672	0.643797
glcE	0.0107085	0.797434
glcF	0.0665309	0.0440504
glcG	-0.0111014	0.837392
gldA	0.0689991	0.0256585
glf	-0.0121022	0.938586
glgA	0.0907174	0.0331446
glgB	0.0104515	0.923112
glgC	0.0660123	0.136026
glgP	0.0621793	0.287153
glgS	-0.0278571	0.668113
glgX	0.0713119	0.0221135
glk	-0.0230006	0.694551
glmM	-0.315533	0.739997
glnB	-0.156721	0.00140938
glnD	-0.064437	0.236408
glnE	-0.0368789	0.386937
glnG	0.0568328	0.493187
glnH	-0.0575967	0.508064
glnK	-0.126989	0.00192387
glnL	-0.0373268	0.430047
glnP	0.026447	0.776104
glnQ	-0.0959497	0.0147596
gloA	-0.149796	0.637079
gloB	-0.0448812	0.609616
glpA	-0.0166684	0.779706
glpB	-0.0233821	0.676301
glpC	-0.0587057	0.0625137
glpD	0.0935599	5.47273e-08
glpE	0.0774486	0.0116641
glpF	0.0689964	0.00528346
glpG	0.112656	2.92093e-05
glpK	0.011061	0.465162
glpQ	-0.00501836	0.9298
glpR	0.029946	0.761275
glpT	-0.058718	0.0788378
glpX	0.0968572	0.00221689
gltA	0.0568891	0.452958
gltD	0.0117452	0.682286
gltF	0.138068	0.073136
gltI	-0.10556	0.00197571
gltJ	-0.0667205	0.258769
gltK	-0.0317615	0.70065
gltL	0.00238137	0.971161
gltP	0.0716598	0.000265553
gltS	0.0380005	0.0323048
glvB	0.0619866	0.000120808
glvC	0.195713	0.00632441
glvG	0.058216	0.00022054
glxK	-0.0504621	0.632774
glxR	-0.023727	0.759216
glyA	-1.35995	0.742568
gmd	-0.0252171	0.666031
gmhB	0.948343	0.83465
gmr	0.000601534	0.998381
gnd	0.0405949	0.614466
gnsA	NA	NA
gntK	0.0226006	0.765403
gntP	0.003701	0.962733
gntR	0.101301	0.314141
gntT	0.0486916	0.202191
gntU	0.0604787	0.197358
gntX	0.117303	0.0356652
gntY	0.134723	0.340175
gor	0.0698618	0.269989
gph	0.00198331	0.959174
gpmA	-0.165769	0.00608575
gpp	0.0672205	0.000292149
gpt	0.121701	0.00477699
greA	-0.0222242	0.799306
greB	0.0642923	0.328004
groL	NA	NA
grxA	-0.107788	0.000383245
grxB	-0.0516982	0.182211
grxC	0.0350691	0.118886
gshA	-0.0562098	0.388509
gshB	-0.0416909	0.538504
gsk	0.0327441	0.290213
gspA	0.00637206	0.895826
gspC	0.0484327	0.330509
gspD	0.0208082	0.604509
gspE	-0.040499	0.632774
gspG	-0.0687708	0.533365
gspH	0.0238263	0.640931
gss	0.0711033	0.0385601
gst	-0.111467	0.096338
guaA	NA	NA
guaB	NA	NA
guaC	0.0914744	0.00174526
guaD	-0.0159554	0.653393
gudD	0.0785576	0.039968
gudP	0.0355159	0.287366
gudX	-0.029447	0.305977
gutM	-0.0664502	0.518371
gutQ	0.0258395	0.782777
hcaB	-0.124791	0.0949026
hcaC	-0.0886773	0.203827
hcaD	-0.00666129	0.938343
hcaE	0.0442542	0.549364
hcaF	0.000787046	0.995301
hcaR	0.0434843	0.592439
hcaT	-0.0524917	0.27742
hchA	-0.0357591	0.561684
hcp	-0.0460677	0.256599
hcr	-0.0470778	0.171866
hda	0.271589	0.88873
hdeA	0.0940988	0.00223424
hdeB	0.0285566	0.505537
hdeD	0.0913876	0.00606314
hdfR	-0.126604	0.00911199
hdhA	-0.177825	0.000156153
helD	-0.0950214	0.00144949
hemF	-0.00439345	0.931008
hemG	-0.572564	0.43728
hemN	0.0727463	0.112723
hemX	0.0682031	0.183543
hemY	0.0678098	0.155391
hepA	-0.0108174	0.656263
hflC	0.0866544	0.0186765
hflD	-0.0842697	0.140278
hflK	0.104611	0.00144774
hflX	0.0138494	0.75212
hfq	-1.25394	0.690337
hha	0.0287232	0.461829
hinT	-0.0886672	0.0516357
hipA	0.221893	0.243969
hipB	0.0779705	0.566058
hisA	-0.111735	0.017573
hisB	-0.060175	0.22134
hisC	-0.0833951	0.0951672
hisD	-0.0196029	0.756883
hisF	-0.0978864	0.0110802
hisH	-0.064746	0.137543
hisI	-0.041663	0.22321
hisJ	-0.0809482	0.266741
hisL	-0.0406711	0.394417
hisM	-0.0774353	0.231616
hisP	-0.0336808	0.731304
hisQ	0.00383918	0.974318
hlpA	-0.216231	2.16321e-06
hlyE	-0.0988875	0.153152
hmp	-0.0596285	0.111099
hns	0.510337	0.669881
hofB	0.033807	0.471567
hofC	-0.0030102	0.952983
hofQ	0.179809	2.8969e-15
hokA	0.0782264	0.00195004
hokB	-0.00927326	0.935873
hokC	0.0690468	0.348164
hokD	0.00213642	0.990893
hokE	0.00363861	0.955306
holC	-0.782925	0.330509
holD	-1.35995	0.745487
holE	0.00839686	0.933808
hpt	0.0151871	0.711355
hrpA	-0.110972	0.756011
hrpB	0.0206007	0.708723
hscA	-0.157907	0.215882
hscB	0.0470026	0.739888
hscC	-0.117109	0.014518
hsdM	0.0124479	0.867577
hsdR	0.0627966	0.322826
hsdS	0.0192107	0.727115
hslJ	-0.0160751	0.88873
hslO	0.1004	9.11077e-05
hslR	0.0304954	0.398361
hslU	0.0706681	0.000915032
hslV	0.0677567	0.0083291
hsrA	-0.0836746	0.025125
htgA	0.0126176	0.69304
htpG	-0.0422775	0.170703
htpX	-0.0487218	0.168057
htrC	0.0537184	0.263539
htrE	0.0373309	0.646895
htrG	0.078112	0.00230363
hupA	-0.234119	2.50341e-35
hupB	-0.197282	8.90495e-25
hyaA	-0.197546	0.133061
hyaB	-0.110564	0.0663477
hyaC	-0.110545	0.146897
hyaD	-0.104457	0.146987
hyaE	-0.081698	0.153305
hyaF	-0.0694598	0.189141
hybA	-0.00219154	0.970514
hybB	0.0533936	0.178765
hybC	-0.035933	0.375326
hybD	-0.00926693	0.866827
hybE	0.0416545	0.272874
hybF	0.0802462	0.213801
hybG	0.0517219	0.225062
hybO	0.0361894	0.457043
hycA	0.010273	0.88667
hycB	-0.0488295	0.234391
hycC	0.00602202	0.916335
hycD	0.029269	0.666031
hycE	0.0143869	0.832631
hycF	-0.00805331	0.889581
hycG	-0.0643531	0.0754935
hycH	-0.0104502	0.853777
hycI	-0.0256552	0.599418
hydN	0.0228683	0.658147
hyfA	-0.0166949	0.665587
hyfB	0.0118882	0.790653
hyfC	0.00881479	0.8131
hyfD	-0.0350942	0.255569
hyfE	-0.0319718	0.388323
hyfF	-0.0140865	0.745487
hyfG	0.00086658	0.990687
hyfH	-0.0502493	0.231921
hyfI	-0.0185941	0.856052
hyfJ	-0.10943	0.231668
hyfR	-0.0402771	0.76196
hyi	0.0205338	0.666604
hypA	0.047459	0.284593
hypB	0.0149716	0.733376
hypC	0.0293016	0.499104
hypD	-0.00477308	0.934973
hypE	0.00904711	0.895929
hypF	-0.0249572	0.671224
hyuA	0.00392189	0.91909
iaaA	-0.102651	0.0271421
iadA	-0.0241766	0.62952
iap	-0.00236667	0.972685
ibpA	0.0801997	3.13814e-06
ibpB	0.0707035	0.0230066
icd	0.00563771	0.98637
icdC	-0.11551	0.0272077
iclR	0.0189158	0.677638
idi	-0.00767154	0.832965
idnD	0.0248566	0.665783
idnK	0.0477542	0.213831
idnO	0.0231648	0.588242
idnR	0.0309527	0.421618
idnT	-0.00160229	0.974838
ihfA	-0.774263	0.791949
ihfB	1.40836	0.619617
ileS	NA	NA
ilvA	0.0836942	0.0347453
ilvB	0.0665515	0.000117474
ilvD	0.0470524	0.0887777
ilvE	0.055431	0.0147535
ilvH	0.0390666	0.081334
ilvI	0.0253282	0.592439
ilvL	0.0596247	0.00427761
ilvM	0.0635691	0.00804954
ilvN	0.0531086	5.5728e-05
ilvY	0.0875704	0.0115982
inaA	-0.0818581	0.0171502
intA	-0.0200853	0.579761
intB	0.061562	0.121367
intD	0.124931	0.264629
intE	-0.128492	0.0754935
intF	0.408575	0.000346396
intQ	-0.191658	0.257725
intR	0.040039	0.327558
intS	-0.00134605	0.994282
iscA	-0.117871	0.456491
iscR	-0.0577992	0.0739968
iscS	0.371263	0.955306
iscU	-0.0218004	0.933808
ispA	NA	NA
ispU	NA	NA
ivbL	0.0569494	0.000140161
ivy	0.0185322	0.652508
katE	-0.062196	0.732569
katG	0.0659368	0.0737749
kbaY	0.0442657	0.30102
kbaZ	0.0233373	0.646098
kbl	0.00879469	0.856575
kch	-0.0741066	0.244297
kdgK	0.106351	0.000398104
kdgR	-0.0636506	0.283155
kdgT	0.0391493	0.148674
kdpA	-0.0219722	0.737305
kdpB	0.00670067	0.90865
kdpC	-0.00400483	0.940595
kdpD	-0.320189	2.92093e-05
kdpE	-0.0506794	0.559225
kdpF	-0.0426962	0.632427
kdsC	0.0260493	0.464575
kdsD	-0.0544655	0.0685094
kduD	0.0537288	0.509204
kduI	0.00384123	0.9298
kefB	0.0336361	0.701775
kefC	0.0176017	0.50588
kefF	0.0410132	0.0616027
kefG	0.0612289	0.0824093
kgtP	0.0148155	0.828509
kil	-0.0094017	0.995301
kptA	0.0409708	0.592304
ksgA	-0.151775	0.128408
lacA	-0.0125064	0.825759
lar	-0.00601075	0.982529
ldcA	-0.381549	0.20591
ldcC	0.0455015	0.123352
ldhA	0.105676	0.126622
lepA	0.0573647	0.889581
leuA	-0.013804	0.610428
leuB	0.0459065	0.259291
leuC	0.0125293	0.737687
leuD	0.00420984	0.955861
leuL	0.00440175	0.9298
leuO	0.0516436	0.140333
lhr	-0.108067	0.15806
ligB	0.0709435	0.00115066
ligT	-0.0245475	0.509619
lipA	-1.9147	0.25035
lipB	0.0599829	0.83465
lit	0.0441035	0.580254
livF	0.0859956	0.0529515
livG	0.0657831	0.0984293
livH	0.0849954	0.0445796
livJ	0.0366581	0.513101
livK	0.0408484	0.598204
livM	0.136997	0.000687344
lldD	0.0429848	0.0887777
lldP	0.0884126	0.00773069
lldR	0.138463	8.28166e-09
lon	0.135594	0.134419
lpcA	NA	NA
lpd	NA	NA
lplA	-0.0177926	0.915728
lpp	-0.272082	0.00174526
lpxA	0.0517089	0.63527
lrp	0.127233	0.023897
lsrB	0.0255993	0.940539
lsrC	-0.0633714	0.658147
lsrD	-0.0246385	0.919849
lsrF	-0.044517	0.585025
lsrG	-0.0395435	0.760189
ltaE	-0.0373287	0.356225
luxS	-0.116615	0.579747
lysA	0.0438834	0.14196
lysC	0.00737361	0.8876
lysP	-0.0926757	0.106082
lysR	0.0338496	0.30297
lysS	-0.21893	0.000290019
lysU	0.0721609	0.0728156
lyxK	0.0971442	0.000126658
maa	-0.000655004	0.995301
macA	-0.0938557	0.111984
macB	-0.088411	0.000257832
maeB	0.0167598	0.6632
mak	0.00620094	0.881987
malE	0.153207	9.7784e-15
malG	0.0319435	0.379817
malI	-0.187057	0.0963289
malK	0.0102518	0.742173
malM	0.0638554	0.0110802
malP	0.0414745	0.39397
malQ	0.0482439	0.348164
malS	0.0363492	0.153168
malT	0.0623634	0.0952955
malX	-0.0614166	0.519456
malY	-0.259333	5.54443e-06
malZ	-0.0683969	0.0318727
manA	-0.0814569	0.272478
manX	-0.0730525	0.403121
manY	-0.211506	0.0450192
manZ	-0.093999	0.0178254
maoC	-0.03217	0.575773
marA	-0.154362	0.227362
marC	-0.0993733	0.526919
marR	-0.0450497	0.662817
mazG	0.0110208	0.801219
mbhA	0.109591	0.00910277
mcrA	-0.0415169	0.670354
mcrB	0.025021	0.83465
mcrC	0.0199571	0.751329
mdaB	0.0493967	0.175997
mdh	0.0313323	0.602883
mdlA	-0.0758885	0.00539854
mdlB	-0.0509222	0.20591
mdoB	0.063909	0.0607993
mdoC	-0.0482565	0.24934
mdoD	-0.0836546	0.240751
mdoG	0.0289094	0.371898
mdoH	0.0448612	0.189899
mdtA	-0.0427055	0.298286
mdtB	0.00361988	0.942738
mdtC	-0.0354725	0.400503
mdtD	0.0647836	0.449545
mdtE	-0.100654	0.0126725
mdtF	-0.147935	1.82824e-08
mdtG	-0.14875	0.00178689
mdtH	-0.0450142	0.452011
mdtI	-0.136604	0.0410951
mdtJ	-0.0702861	0.400208
mdtK	-0.0994345	0.0928691
melA	0.0786237	0.0210589
melB	0.103444	0.0022167
melR	0.135751	0.00208884
menA	-0.102897	0.00262035
menB	-0.0135031	0.780654
menD	0.0207222	0.632427
menE	0.0405364	0.44483
menF	-0.0376267	0.509204
mepA	-0.0160238	0.856701
metA	0.040328	0.140863
metB	0.0469692	0.0945461
metC	0.0762966	0.020924
metE	0.0711005	0.00356774
metF	0.0323178	0.554966
metH	0.0511328	0.071501
metI	0.0973619	0.0447084
metJ	-0.283623	0.548858
metL	-0.240753	0.236094
metN	0.00265683	0.958481
metQ	NA	NA
metR	0.0930734	0.000538504
mfd	-0.138669	4.76225e-09
mglA	0.057389	0.530365
mglB	-0.11706	0.254106
mglC	0.123432	0.0316013
mgsA	-0.0543196	0.0528067
mgtA	0.0318764	0.737805
mhpA	0.0350385	0.266136
mhpB	-0.0698209	0.172355
mhpC	0.0209463	0.780914
mhpD	-0.0179334	0.683107
mhpE	0.0578909	0.0743053
mhpF	0.0570534	0.210287
mhpR	0.0543789	0.180463
mhpT	0.0458148	0.227362
miaA	-0.211723	0.24849
miaB	-0.0533006	0.0824093
minC	0.0993971	0.119886
minD	0.193561	2.74292e-08
minE	0.20117	2.888e-06
mioC	0.118318	0.000477159
mipA	-0.0910078	0.0843957
mlrA	-0.0402341	0.564546
mltB	0.0320529	0.536079
mltC	-0.00768694	0.896361
mltD	0.0857612	0.215954
mmuM	0.462403	0.0116937
mmuP	0.402289	0.0122031
mngA	-0.0664577	0.120593
mngB	0.00182897	0.99122
mngR	-0.103682	0.151746
mntH	-0.139082	0.00421291
mntR	0.0128417	0.871555
moaA	0.000590413	0.99551
moaB	-0.099186	0.0733634
moaC	-0.0685325	0.229168
moaD	-0.0340212	0.646357
moaE	-0.00289383	0.979092
mobB	0.0509961	0.0653302
modA	0.0305751	0.778365
modB	-0.013738	0.871555
modC	-0.0100325	0.926832
modE	-0.0104524	0.915538
modF	0.0104791	0.884549
moeA	-0.0372136	0.62827
moeB	-0.0430812	0.592089
mog	0.0360277	0.477088
motA	-0.0733221	0.408854
motB	-0.0882518	0.156423
mpaA	-0.0769507	0.319862
mpl	0.0125327	0.766046
mppA	-0.18691	0.130258
mprA	-0.0157079	0.658147
mqo	-0.0585746	0.0824093
mraW	-0.056427	0.592685
mraZ	-0.0163412	0.641458
mrcA	0.0222655	0.634547
mrcB	-0.105604	0.310803
mreD	NA	NA
mrp	-0.0245378	0.782049
mrr	0.0558039	0.16629
mscL	0.0426844	0.0788096
msrA	0.000809391	0.990893
msyB	-0.135213	1.60762e-06
mtgA	0.0341254	0.284519
mtlA	0.0855918	0.00555276
mtlD	0.0714812	0.00120589
mtlR	-0.0062402	0.895192
mtr	0.030272	0.635918
murP	0.0396429	0.31109
mutH	0.147486	0.851479
mutL	NA	NA
mutM	0.0292512	0.191055
mutS	NA	NA
mutT	NA	NA
mutY	0.0287015	0.524414
mviM	-0.147571	2.00691e-08
nac	-0.0593966	0.266684
nadA	0.0789636	0.676362
nadB	-0.197281	0.000867991
nadC	0.0051361	0.954698
nadR	0.0619615	0.130865
nagA	-0.00444463	0.994039
nagB	-0.0896741	0.000198619
nagC	-1.8059	0.290511
nagD	-0.0364948	0.324487
nagE	-0.0653007	0.0592149
nagZ	-0.1213	0.040954
nanA	0.0261288	0.605039
nanE	0.0865252	0.00209586
nanR	-0.0166323	0.686447
nanT	0.0341928	0.22321
napA	-0.0365107	0.254709
napB	0.00728569	0.882358
napC	-0.0587029	0.144856
napD	-0.0360118	0.389969
napF	0.0573436	0.260364
napG	-0.0221613	0.637387
napH	-0.0341569	0.357265
narG	-0.0743049	0.252979
narH	-0.0982502	0.00670211
narJ	-0.0926997	0.0824093
narK	-0.113977	0.204641
narL	-0.156809	0.00188054
narQ	-0.0334021	0.410313
narU	-0.0944001	0.561495
narV	0.0789357	0.319862
narW	-0.045579	0.669881
narX	-0.0677816	0.242123
narY	0.0140467	0.915728
narZ	0.044499	0.666273
ndh	-0.129758	0.181345
ndk	-0.0998571	0.454666
nemA	-0.0828686	0.497686
nfi	0.219892	2.10485e-07
nfo	-0.0195016	0.692897
nfrA	-0.0653724	0.471769
nfrB	-0.00701406	0.937125
nfsA	-0.119626	2.72707e-06
nhaA	0.043485	0.840174
nhaB	-0.279763	5.11842e-10
nhaR	-0.00800928	0.854173
nhoA	0.0277668	0.75212
nikA	0.0185241	0.737305
nikB	0.00671531	0.895946
nikC	0.051455	0.183543
nikD	0.0227503	0.831861
nikE	0.0846434	0.0262069
nikR	0.0421385	0.347472
ninE	0.123464	0.499998
nirB	0.0142786	0.677198
nirC	0.0325239	0.208111
nirD	0.0178682	0.623143
nlpA	0.0103118	0.731522
nlpB	-0.0220835	0.402396
nlpC	-0.0787952	0.526919
nlpD	-0.148443	3.13814e-06
nlpE	0.000550447	0.995837
nlpI	-0.223683	0.0678247
nmpC	0.177135	2.37284e-05
norR	-0.000135801	0.998735
norV	-0.00906956	0.916335
norW	-0.0387058	0.266684
npr	-0.0538024	0.10944
nrdD	-0.142994	0.00340615
nrdE	-0.0103331	0.889186
nrdF	-0.0655545	0.0968493
nrdG	-0.180519	1.67845e-06
nrdH	0.0131119	0.700449
nrdI	-0.0138758	0.776104
nrfA	0.0591669	0.00584075
nrfB	0.0531274	0.0247414
nrfC	0.0613676	0.00677164
nrfD	0.0665929	0.0024614
nrfE	0.0547015	0.0298946
nrfF	0.109249	5.6121e-06
nrfG	0.102586	1.2568e-05
nth	-0.226222	0.0284288
nudB	0.173176	0.804449
nudC	0.0301232	0.235213
nudD	-0.0567665	0.00665972
nudF	0.033924	0.298777
nudG	-0.0934896	0.231616
nudH	-0.153769	0.776104
nuoA	-0.0349544	0.709461
nuoB	-0.00844597	0.937569
nuoC	0.0446643	0.583177
nuoE	-0.0484795	0.749344
nuoG	-0.0655465	0.213483
nuoH	-0.0286139	0.733376
nuoI	NA	NA
nuoJ	-0.171764	0.265044
nuoM	-0.101878	0.483201
nuoN	0.000442428	0.997797
nupC	0.0176761	0.724536
nupG	0.0724814	0.197028
nusB	-0.384975	0.436595
ogrK	-0.00646283	0.883849
ogt	-0.0372513	0.694157
ompA	-0.692597	0.00208606
ompC	0.25076	0.694157
ompF	0.12389	0.00541161
ompG	-0.100758	0.458654
ompL	0.0343297	0.259004
ompN	-0.0836013	0.504998
ompR	-0.247244	0.922409
ompT	-0.0214271	0.765403
ompW	-0.139967	0.00356774
ompX	-0.0447467	0.536222
oppB	-0.0930081	0.0821647
oppC	0.0140185	0.868603
oppD	-0.0710125	0.116292
oppF	-0.0696681	0.231575
osmB	-0.0881247	0.524187
osmC	-0.0774766	0.45219
osmE	-0.0193065	0.889581
osmY	0.023832	0.508623
otsA	-0.0755549	0.387626
otsB	-0.0494256	0.392664
oxc	-0.0669257	0.474733
oxyR	0.254006	0.417151
paaA	-0.0390843	0.32746
paaB	0.00672267	0.9298
paaC	-0.0514487	0.322688
paaD	0.0226346	0.665587
paaE	0.0924365	0.519547
paaF	-0.0220081	0.526613
paaG	0.00854403	0.936883
paaH	0.0348481	0.585349
paaI	-0.0524964	0.435742
paaJ	0.131276	0.0622103
paaK	-0.0239009	0.813024
paaX	0.00199531	0.99122
paaY	0.111661	0.45219
pabA	0.0957529	0.000576278
pabB	-0.0583978	0.115205
pabC	0.0367984	0.518604
pal	-0.255852	0.464209
panB	-0.0338958	0.592089
panC	0.0605475	0.140617
panD	-0.00738458	0.854173
panE	-0.0112971	0.762328
panF	-0.0129353	0.771003
pbl	-0.0267591	0.70105
pbpC	0.00222497	0.961902
pbpG	0.0174842	0.747665
pck	0.0794454	0.00729501
pcm	-0.0630294	0.332343
pcnB	0.00797098	0.938006
pdhR	-0.0693705	0.281736
pdxA	-0.436175	7.23265e-08
pdxB	-0.8699	0.116486
pdxJ	-0.445217	0.0400905
pdxK	-0.0358139	0.182752
pdxY	0.0822066	0.765496
pepA	-0.0651798	0.040954
pepB	0.0872125	0.126622
pepD	0.135898	0.0210589
pepE	0.0539487	0.0137294
pepN	-0.114138	0.090937
pepP	-0.0495832	0.29231
pepQ	-0.0106997	0.76196
pepT	-0.309684	2.0544e-23
perR	-0.782879	0.895929
pfkA	-0.408881	5.20312e-05
pfkB	-0.0307566	0.70105
pflA	-0.238899	7.52335e-10
pflB	-0.180074	1.04223e-06
pflC	0.0655526	0.00762128
pflD	0.0567401	0.0542551
pfs	-1.01688	0.531966
pgi	-1.42698	2.17543e-26
pgm	-0.224468	0.0999115
pgpA	0.144863	0.809548
pgpB	-0.121273	0.689495
pheA	0.0719846	0.228918
pheL	-0.0758289	0.14205
pheP	-0.0312116	0.451845
phnB	0.11293	0.000145106
phnC	0.109256	3.17416e-05
phnD	0.100829	0.000131312
phnE	0.124148	7.0804e-08
phnF	0.0750373	0.0080763
phnG	0.0772305	0.00632023
phnH	0.131488	2.2026e-06
phnI	0.115954	2.58127e-06
phnJ	0.124097	0.00120589
phnK	0.112827	1.2568e-05
phnL	0.0885254	0.0538139
phnM	0.174806	0.000408729
phnN	0.174622	0.000307188
phnO	0.116364	9.37629e-07
phnP	0.0729937	0.029437
phoA	0.0197946	0.641458
phoB	0.0100815	0.738978
phoE	0.106581	0.00799633
phoH	-0.0204115	0.575006
phoP	0.53884	0.66409
phoQ	-0.782879	0.895929
phoR	0.0304529	0.366402
phoU	0.101175	4.64653e-14
php	0.0716329	0.017046
phr	-0.0460261	0.262438
pin	0.0545435	0.452979
pinH	-0.111001	0.230276
pinQ	-0.350742	0.0380964
pioO	0.0171619	0.695335
pitA	-0.0490819	0.214588
pitB	0.0336219	0.417151
pldA	0.081672	0.0870104
pldB	0.0823975	0.0484515
plsB	0.353752	0.00210536
plsX	-0.0503115	0.096265
pmbA	0.0261162	0.604509
pmrD	-0.0451952	0.288509
pncA	-0.0517043	0.287795
pncB	-0.0334595	0.641458
pnp	-0.132041	0.020614
pntA	-0.14649	0.0815182
pntB	-0.113074	0.146987
pnuC	0.0434691	0.507614
polA	0.0605011	0.285721
polB	0.0545459	0.213483
potA	-0.135815	0.0337866
potB	-0.0823156	0.00598691
potC	-0.0878307	0.0247924
potD	-0.123929	0.000106396
potE	0.0106326	0.868603
potF	-0.128136	0.0184669
potG	-0.0969716	0.00538237
potH	-0.0675603	0.172998
potI	-0.120852	0.00169751
poxA	-0.191824	0.00168641
poxB	-0.0440778	0.177946
ppc	-0.20725	3.29108e-05
ppdA	-0.0640585	0.0145356
ppdB	-0.119504	4.92146e-07
ppdC	-0.042108	0.140774
ppdD	0.0561009	0.316594
pphA	-0.0740684	0.291793
pphB	-0.0513544	0.272478
ppiA	0.0501586	0.045842
ppiB	-0.0163091	0.798916
ppiD	-0.0320728	0.452994
ppk	0.249232	0.574987
pppA	0.0308078	0.522056
pps	-0.0597823	0.501947
ppx	-0.0483218	0.632774
pqiA	-0.0813519	0.310531
pqiB	-0.19277	0.00219202
pqqL	-0.0769865	0.235213
prc	-0.539344	9.82659e-08
prfC	-0.328972	3.06168e-12
prfH	0.0604222	0.16771
priA	0.154612	0.000135347
priB	NA	NA
priC	-0.0302901	0.416092
prkB	0.0473063	0.225208
prlC	0.082232	0.0123061
prmA	0.0798647	0.00141218
prmB	-0.525507	0.459867
prmC	NA	NA
proA	0.226383	2.74208e-06
proB	0.116711	0.0178254
proC	-0.16185	0.572076
proP	0.0570805	0.208628
proQ	-0.499825	1.41495e-80
proV	-0.0671454	0.0754935
proW	0.0234869	0.653751
proX	-0.0100676	0.883588
proY	-0.0125528	0.67665
prpB	0.0513403	0.494314
prpC	0.0436921	0.652132
prpD	0.085873	0.0750271
prpE	0.00777362	0.856207
prpR	0.0303256	0.652132
psiF	-0.054862	0.253798
pspA	-0.00365193	0.939012
pspB	-0.0468479	0.374022
pspC	-0.0791989	0.0542551
pspD	0.0268137	0.827852
pspE	-0.0320843	0.601659
pspF	-0.0468797	0.364303
pstA	0.0428436	0.938603
pstB	0.0569807	0.150591
pstS	0.0139924	0.919912
pta	-0.153757	0.81289
ptr	0.0178809	0.63527
ptrB	NA	NA
ptsA	0.030356	0.259004
ptsG	-0.513415	6.86578e-85
ptsI	-0.472183	0.474671
ptsN	0.12152	2.40732e-06
ptsP	-0.0852641	0.0137333
purA	-1.87476	0.0928691
purB	NA	NA
purC	-0.652598	0.104998
purD	-0.684907	0.0178254
purE	-1.30402	0.0822421
purF	-0.772843	0.287795
purH	-1.0275	0.0107104
purK	-0.833467	0.00756975
purL	-1.28047	0.00407471
purM	-0.678264	0.371802
purN	-0.128332	0.410871
purR	-0.242773	2.02632e-07
purT	0.00208851	0.991341
purU	-0.173622	0.0902226
puuA	-0.0726107	0.0902226
puuB	-0.0523039	0.314156
puuC	-0.0587182	0.566058
puuD	-0.155219	1.44495e-06
puuE	-0.139481	0.00393694
puuP	-0.031863	0.544459
puuR	-0.0745401	0.0383725
pykA	0.0266291	0.522129
pykF	-0.26425	0.000282623
pyrB	-1.35995	0.759149
pyrC	-1.93878	0.350682
pyrD	-1.35995	0.731266
pyrF	-0.718833	0.500374
pyrI	0.0907297	0.00403348
pyrL	0.114239	0.0073901
qor	0.066327	0.00569329
qseB	0.016317	0.776104
qseC	-0.0417355	0.733136
queA	-0.000262245	0.995837
racC	0.228134	0.781806
radA	-0.00203008	0.962055
rarA	-0.00284684	0.973145
rarD	0.069638	0.0227253
rbbA	0.0456893	0.202191
rbfA	-0.204616	0.909713
rbn	0.0559501	0.113751
rbsA	0.142315	9.83141e-07
rbsB	0.112707	0.000398104
rbsC	0.168317	1.91594e-12
rbsD	0.0893237	9.18824e-05
rbsK	0.118936	2.2026e-06
rbsR	-0.00861246	0.763759
rcsA	0.0639378	0.417978
rcsD	-0.026405	0.565477
rcsF	0.0303914	0.49345
rdgC	0.130413	3.89418e-05
recA	-1.46637	1.84089e-17
recB	-0.364012	0.204641
recC	-0.30597	0.521195
recD	0.175381	6.03387e-10
recE	0.0909141	0.693343
recF	-0.0957925	0.00393694
recG	0.381345	2.83422e-72
recJ	-0.251943	3.3021e-34
recN	-0.0195045	0.640104
recO	-0.278944	1.18525e-07
recQ	0.056669	0.0906288
recR	-0.28946	5.33984e-05
recT	0.0453364	0.579761
recX	0.0143776	0.875121
relA	-0.357033	3.48438e-20
relE	-0.146508	0.0177788
rem	-0.136493	4.25504e-17
renD	0.017966	0.782578
rep	0.247122	0.45566
rfaB	-0.00452011	0.971625
rfaC	-0.782879	0.895929
rfaD	0.0645926	0.954958
rfaE	1.58869	0.530365
rfaF	0.463385	0.473359
rfaG	-0.108685	0.363255
rfaH	-0.0129421	0.978249
rfaI	-0.000149936	0.998848
rfaJ	0.0800403	0.00910943
rfaK	0.0614053	0.000221543
rfaL	0.111859	2.5726e-06
rfaQ	0.0224681	0.683107
rfaS	0.0560576	0.0353908
rfaY	0.0175097	0.830437
rfaZ	0.0304822	0.634971
rfbA	0.0129879	0.910259
rfbB	0.00973021	0.902429
rfbC	-0.0782964	0.276844
rfbD	0.00113535	0.990893
rfbX	0.0348934	0.651477
rfe	0.0502998	0.493187
rffA	0.202174	0.345059
rffC	-0.204791	0.758816
rffD	0.185328	1.10758e-10
rffE	0.298159	1.37141e-11
rffG	0.073672	0.00952347
rffH	0.085318	0.00137892
rffM	0.149095	9.5576e-06
rffT	0.24881	5.57491e-13
rhaA	0.0383641	0.427968
rhaB	0.0275252	0.4598
rhaD	0.0468698	0.141734
rhaR	-0.0306914	0.579403
rhaS	0.0326619	0.337352
rhaT	0.0584896	0.13308
rhlB	0.0158051	0.592439
rhlE	-0.0387863	0.506068
rhoL	0.108792	5.6344e-05
rhsD	-0.134844	0.417978
rhsE	-0.00333989	0.995301
rhtA	-0.0105751	0.867674
rhtB	0.0923852	0.00206961
rhtC	0.0419479	0.175006
rihA	0.100921	0.535901
rihB	-0.00431405	0.960651
rihC	0.0434004	0.0592303
rimI	-0.0113184	0.886007
rimJ	-0.0872155	0.0608804
rimK	-0.0475915	0.192551
rimL	0.0601406	0.592624
rimM	NA	NA
rlmB	0.00997078	0.872149
rlpA	-0.00245762	0.974318
rluA	-0.0103091	0.817128
rluB	-0.315562	1.59071e-05
rluC	-0.0563784	0.624889
rluD	-0.161896	0.0109227
rmf	-0.0226677	0.837392
rmuC	0.0234299	0.537463
rna	-0.00365731	0.971933
rnb	-0.319166	3.08678e-10
rnc	-1.23143	0.70105
rnd	-0.177419	0.000480399
rng	-0.0711276	0.269757
rnhA	-0.492404	0.00507258
rnhB	0.0654894	0.080205
rnk	-0.0499287	0.231921
rnr	NA	NA
rnt	0.178585	0.742568
rob	-0.0923338	0.00268512
rof	0.0419287	0.352904
rpe	-0.144751	0.852163
rph	0.00627448	0.902429
rpiA	0.770523	0.316594
rpiB	0.0997309	0.000126658
rpiR	0.00915943	0.828585
rplD	NA	NA
rplI	-0.178688	0.0928691
rplU	0.371272	0.935873
rpmA	NA	NA
rpmB	-0.413352	0.670568
rpmE	0.189042	0.0543588
rpmF	-0.616697	0.191797
rpmH	0.00234487	0.998885
rpmI	-1.21825	0.631806
rpmJ	0.114582	0.923273
rpoD	-0.864618	0.0788096
rpoS	-0.76584	2.75691e-130
rpoZ	-0.0213934	0.267872
rpsO	-0.26055	0.720463
rpsT	0.276945	0.00477699
rpsU	-0.277298	0.709461
rraA	0.0818521	0.00121949
rrmA	-0.0761038	0.194144
rrmJ	NA	NA
rsd	0.0748658	7.88309e-05
rseB	-0.0930844	0.0902226
rseC	-0.0813957	0.0771512
rsgA	-0.782879	0.895929
rsmB	-0.00507022	0.886583
rsmC	0.0440192	0.528977
rspA	-0.10654	0.0296529
rspB	-0.062787	0.685732
rssA	-0.657933	1.67711e-186
rssB	0.0926838	0.656294
rstA	-0.0541852	0.646098
rstB	-0.141461	0.103684
rsuA	-0.0543426	0.344884
rsxA	-0.156052	0.148674
rsxB	0.0798608	0.632774
rsxC	-0.0590837	0.741612
rsxD	-0.0299446	0.820585
rsxE	-0.100212	0.597175
rsxG	-0.0706368	0.643888
rtcA	0.0765821	0.146897
rtcB	0.104281	0.00656022
rtcR	0.0879006	0.186261
rtn	-0.0548339	0.531504
rumA	-0.0484907	0.150546
rumB	-0.0877864	0.00203486
rusA	0.0345075	0.832965
ruvA	-0.635052	2.14621e-24
ruvB	-0.301595	0.310661
ruvC	-0.829299	1.57111e-05
rzoD	-0.0363028	0.687869
rzpD	-0.0534764	0.522255
sanA	-0.135517	0.278049
sapA	-0.0388512	0.663369
sapB	-0.0580945	0.394417
sapC	-0.0592096	0.279557
sapD	-0.0094072	0.92046
sapF	0.0256924	0.812671
sbcB	-0.0499767	0.0439767
sbcC	-0.0180799	0.651477
sbcD	-0.0157239	0.709181
sbmA	0.00982972	0.806039
sbmC	-0.550083	7.5081e-20
sbp	0.0723273	0.000665287
sdaA	-0.0478546	0.17064
sdaB	0.00525046	0.881884
sdaC	0.0108238	0.831861
sdhA	NA	NA
sdhB	-0.083317	0.0181909
sdhC	-0.0263728	0.669667
sdhD	-0.0196594	0.459119
sdiA	-0.034366	0.675914
secB	0.160945	0.00828094
secD	NA	NA
secF	NA	NA
secG	0.065914	0.831861
selA	0.0756779	0.00535573
selB	0.0209238	0.745511
selD	-0.103939	0.153391
seqA	0.159909	0.709538
serA	-0.258731	0.0788096
serB	-0.193379	0.00278543
serC	-0.633323	5.57327e-06
setA	0.00559705	0.895929
setB	-0.0751596	0.174868
setC	0.0555652	0.0139358
sfcA	-0.0553656	0.572243
sfmA	0.144979	0.385098
sfmC	-0.00925427	0.937569
sfmF	-0.0786729	0.123025
sfmH	-0.0508349	0.539908
sfsB	0.0514167	0.159616
sgbE	0.062279	0.0180735
sgbH	0.0534095	0.0243946
sgbU	0.0469784	0.261212
sgcB	0.038112	0.296013
sgcC	0.0196375	0.55918
sgcE	0.0250094	0.586248
sgcQ	0.0644129	0.0461369
sgcR	0.0346503	0.505446
sgcX	0.0625665	0.183543
sgrR	0.0405805	0.103268
shiA	-0.0991238	0.0780376
sieB	0.0102098	0.956366
sixA	0.0157881	0.76773
slp	0.0345693	0.371898
slt	-0.0023478	0.955365
slyA	-0.170695	0.00356774
slyB	-0.120536	0.0622103
slyD	0.0207456	0.737305
slyX	0.0674862	0.0239689
smf	0.0450226	0.00618473
smg	0.0119227	0.592439
smpA	-0.00635144	0.937569
smpB	0.0166137	0.971933
smtA	0.0852623	0.0533256
sodA	0.0406246	0.244274
sodB	-0.072827	0.499671
sodC	-0.164889	0.00424341
sohA	0.376305	0.371647
sohB	-0.142816	0.0228375
solA	-0.0860778	0.227627
soxR	0.0335245	0.144085
soxS	0.0620004	0.00609622
speA	0.0591182	0.195471
speB	0.0531819	0.580456
speC	0.00831303	0.8876
speD	-0.232568	2.8298e-22
speE	-0.271405	0.0400905
speF	-0.00172042	0.979304
speG	-0.00768762	0.976688
sppA	-0.132036	0.0128992
spr	0.22445	1.08936e-05
sprT	0.10996	0.20591
spy	-0.0770405	0.122111
sra	-0.0899499	0.509217
srlA	-0.0359273	0.658651
srlB	-0.03134	0.440463
srlD	-0.0330759	0.494746
srlE	-0.0654359	0.106302
srlR	-0.0731362	0.174382
srmB	-0.492094	2.49552e-07
sseA	-0.0248514	0.736178
sseB	0.0146088	0.840174
ssnA	0.0487056	0.0977068
sspA	-0.310079	5.87488e-16
sspB	0.0375687	0.0339509
sstT	0.00738786	0.899918
ssuB	-0.0881637	0.267513
ssuC	-0.135072	0.00262035
ssuD	-0.0509325	0.191797
ssuE	-0.0831537	0.0638632
stfE	0.070605	0.323796
stfQ	0.0174879	0.944851
stfR	-0.0666165	0.349331
sthA	0.0386821	0.0195504
stpA	-0.0307487	0.576905
sucB	0.0174841	0.700449
sucC	0.0152737	0.804128
sucD	0.0142018	0.842296
sufA	-0.108147	0.224564
sufB	-0.111987	0.00206607
sufC	-0.0690083	0.238796
sufD	-0.122985	0.156995
sufE	-0.0420105	0.426492
sufI	0.104684	0.000156153
sufS	-0.0624463	0.242689
sulA	-0.260333	0.0151596
surA	-0.105377	0.884549
surE	-0.0236261	0.692601
syd	-0.0228636	0.651979
tag	0.0578718	0.0285746
talA	-0.0012037	0.984389
talB	-0.0857391	3.4417e-07
tam	-0.137248	0.293895
tap	-0.0842359	0.0788096
tar	-0.0496834	0.44833
tas	0.0354137	0.206633
tatA	0.123601	1.10758e-10
tatB	0.525653	0.389969
tatE	0.00213916	0.979366
tauA	0.0271015	0.630897
tauB	0.0583953	0.185962
tauC	-0.0123765	0.798539
tauD	0.0442398	0.203827
tbpA	0.0567725	0.0194403
tdcA	0.0536258	0.46064
tdcB	0.041737	0.737305
tdcC	8.87705e-05	0.998848
tdcF	-0.0061326	0.901212
tdcG	0.0422375	0.270062
tdcR	0.00498662	0.9298
tdh	0.00747762	0.856701
tdk	-0.0963346	0.19077
tehA	-0.0664828	0.461829
tehB	-0.0770568	0.481888
tesA	-0.0367961	0.499998
tesB	0.00413984	0.951405
tfaD	-0.0246674	0.727115
tfaE	0.00768846	0.926479
tfaS	-0.0182493	0.831861
tgt	0.00521395	0.941927
thiC	0.0581477	0.0195504
thiD	0.0164556	0.825696
thiE	0.0798456	0.000579784
thiF	0.0894075	2.13896e-05
thiG	0.0670317	0.00140355
thiH	0.0590607	0.00946003
thiI	0.0871505	0.0757214
thiM	-0.0103966	0.956949
thiP	0.0265429	0.388509
thiQ	0.051317	0.0314489
thiS	0.0983161	8.7994e-08
thrA	-0.00873229	0.82409
thrB	0.0671358	0.0041084
thrC	-0.0191767	0.460176
thrL	0.0978007	0.000114192
tiaE	0.0422808	0.172023
tig	-0.0521311	0.250333
tktB	-0.0111175	0.697972
tldD	-0.0125338	0.647705
tolA	-0.635549	0.229158
tolB	-0.438124	0.546895
tolC	NA	NA
tolQ	-0.0611113	0.879239
tolR	-0.538233	0.428049
tonB	-0.150412	0.0112267
topB	-0.109889	0.141667
torA	-0.0772726	0.000559622
torC	-0.0441469	0.39781
torD	NA	NA
torI	-0.0208572	0.766351
torR	-0.0746954	0.134419
torS	-0.17029	0.00336705
torT	-0.0801644	0.572862
torY	-0.0825487	0.0682848
torZ	-0.0794886	0.0136631
tpiA	1.42018	0.706311
tpr	-0.0342123	0.820477
treA	-0.104624	0.0847522
treB	-0.00104832	0.987631
treC	-0.00186762	0.986538
treF	0.00415159	0.938343
treR	0.050837	0.162212
trg	-0.0329737	0.689495
trkA	0.0648761	0.402547
trkD	0.0624683	0.246358
trkG	0.0497514	0.392622
trkH	0.0959794	0.00470712
trmA	0.0713934	0.000782195
trmC	-0.00750311	0.926503
trmE	-0.014956	0.986614
trmH	0.120165	4.41067e-09
trmU	-0.287282	0.572076
trpA	-0.917071	2.11382e-05
trpB	-1.34441	0.0129455
trpC	-0.520412	2.14621e-24
trpD	-0.526876	1.27889e-06
trpE	-0.743843	7.23296e-08
trpL	-0.182723	0.000156341
trpR	0.0357279	0.266136
truA	0.00356642	0.995301
truB	0.0468806	0.205008
truD	0.0289488	0.531361
trxA	0.0413526	0.579761
trxB	0.0317295	0.704725
trxC	-0.047795	0.375122
tsgA	0.0248542	0.560452
tsr	0.0743041	0.0503112
ttdA	0.0731466	0.0822652
ttdB	0.0247841	0.368858
tus	0.0995599	0.394417
tynA	-0.0643605	0.213813
tyrA	-0.024348	0.528726
tyrB	0.045853	0.097481
tyrP	-0.0622195	0.451262
tyrR	-0.0632689	0.323636
ubiB	0.818243	0.581357
ubiC	0.0281453	0.452934
ubiD	-0.0716009	0.107575
ubiF	0.124509	0.825419
ubiG	-0.0644594	0.194144
ubiH	-0.226767	0.942642
ubiX	0.512304	0.817128
ucpA	0.0115707	0.741339
udk	0.00853411	0.912945
udp	0.0880788	0.00670211
ugd	-0.0329849	0.831861
ugpA	-0.0167755	0.800139
ugpB	0.0995722	0.00336668
ugpC	0.0661166	0.0400905
ugpE	0.0682226	0.0361111
ugpQ	0.0698355	0.0383725
uhpA	0.0492464	0.00619432
uhpB	0.0288628	0.272874
uhpC	0.0633747	0.00268641
uhpT	0.0687775	0.0464618
uidA	-0.12041	0.405876
uidB	-0.244231	0.0494191
uidC	-0.203024	0.00892256
ulaA	0.0547377	0.0534335
ulaB	0.0636283	0.0221135
ulaC	0.0959608	0.00803216
ulaD	0.0434995	0.0707601
ulaE	0.0454511	0.423035
ulaF	0.0469752	0.0972687
ulaG	0.0613568	0.0255743
ulaR	-0.0728301	0.182934
umuC	-0.179528	1.99585e-05
umuD	-0.23167	1.67238e-13
ung	-0.0136702	0.822519
upp	0.0296349	0.658651
uraA	0.0370828	0.646098
usg	-0.061027	0.192945
ushA	0.0665945	0.00410948
uspA	0.101489	0.000796386
uspE	-0.0322732	0.677198
uspF	0.0985257	0.380056
uspG	-0.0130855	0.855465
uup	-0.262016	0.00134726
uvrA	-0.300145	9.27754e-38
uvrB	-0.557014	1.6188e-40
uvrC	-0.197871	0.000309867
uvrD	NA	NA
uvrY	0.0347424	0.780914
uxaA	0.0258051	0.242052
uxaB	-0.0896471	0.207299
uxaC	0.0329387	0.189978
uxuA	0.0294455	0.485504
uxuB	-0.782877	0.832631
uxuR	-0.0163171	0.808087
vacJ	-0.0856139	0.508668
visC	0.0734917	0.550509
vsr	-0.0800016	0.278713
wbbH	-0.0536379	0.668176
wbbI	-0.0658306	0.592304
wbbJ	-0.0933205	0.462436
wbbK	0.00808253	0.951854
wcaA	-0.0740813	0.0521506
wcaB	-0.0223712	0.646098
wcaC	-0.0549108	0.0263721
wcaD	-0.064265	0.0788096
wcaE	-0.152598	0.0823236
wcaF	-0.058453	0.12429
wcaI	-0.0768161	0.168343
wcaJ	-0.0273592	0.694157
wcaK	0.00701621	0.944159
wcaL	-0.00910164	0.922301
wcaM	NA	NA
wrbA	0.0109259	0.895101
wza	-0.104432	0.12399
wzb	-0.0531523	0.389638
wzc	-0.0246011	0.701766
wzxC	-0.0369362	0.366259
wzxE	2.14854	0.285897
wzzE	0.00994738	0.895826
xapA	0.0123585	0.909081
xapB	-0.00535138	0.901333
xapR	-0.0498513	0.163411
xdhA	-0.142942	0.401163
[truncated: 1,681 more rows]

## Sheet: 48h_10_to_1
strain	log2(fold-change)	adjusted p-value
aaeA	0.145525	0.00283714
aaeB	0.0529251	0.0291241
aaeR	0.0472348	0.154046
aaeX	0.0830104	0.192936
aas	-0.00325765	0.947865
aat	-0.062223	0.212298
abgA	-0.0152157	0.917611
abgB	-0.16318	0.513817
abgR	-0.0665691	0.315963
abgT	-0.0249057	0.8287
abrB	0.00254683	0.982048
aceA	0.113139	1.38217e-05
aceB	0.104364	0.00355899
aceE	NA	NA
aceF	-0.0497288	0.943074
aceK	0.128754	0.000103163
ackA	-1.1785	0.321182
acnA	-0.181821	0.00276516
acnB	-0.0109499	0.871374
acpT	0.121705	0.0350046
acrA	0.365423	0.788618
acrB	0.107939	0.905466
acrD	-0.000789023	0.984882
acrE	-0.0103275	0.874489
acrF	0.0388738	0.219577
acrR	0.000156813	0.997566
acs	0.0905668	0.00073375
actP	0.0990112	0.000200436
ada	0.00659791	0.902183
add	-0.033513	0.787917
ade	0.0587611	0.00549938
adhE	-1.31401	2.40708e-20
adhP	0.0503787	0.545674
adiA	0.160371	0.000950698
adiC	0.0262269	0.617753
adiY	0.0487556	0.368161
aegA	-0.0718984	0.0424635
aer	0.0958106	0.000307606
aes	-0.000288301	0.996015
afuB	0.189644	0.315963
afuC	0.21045	0.24299
agaA	0.106563	0.457396
agaB	0.0489348	0.462402
agaD	0.122275	0.00750774
agaI	0.0765699	0.128442
agaR	-0.120293	0.0101162
agaS	0.0607097	0.18018
agaV	0.0529566	0.145531
agaW	0.0325195	0.42625
agp	-0.0769121	0.0385254
ahpF	-0.00229019	0.976977
aidB	0.116979	0.000875513
ais	-0.0279437	0.438446
aldB	0.137389	1.05865e-08
alkA	0.013376	0.8691
alkB	-0.026865	0.658152
allA	0.0239744	0.50246
allB	-0.0729147	0.490845
allC	0.0442821	0.658366
allD	-0.0128546	0.897918
allR	-0.0404281	0.212298
alpA	0.0516552	0.554258
alr	0.112859	0.000607755
alsA	0.0710011	0.0266266
alsB	0.0682207	0.0602414
alsC	0.101603	0.00989512
alsE	0.108757	0.00518311
alx	0.02757	0.482297
amiA	0.0824974	0.0602414
amiB	0.0518668	0.0948733
amn	-0.146068	0.439121
ampD	0.130655	0.0152808
ampE	0.0419733	0.53287
ampG	0.039521	0.321519
ampH	0.0445358	0.359515
amtB	0.00698186	0.918132
amyA	-0.0566479	0.297018
ansA	-0.0704313	0.458082
ansB	0.00372445	0.953769
ansP	-0.0131858	0.89208
apaG	0.224941	1.93458e-41
apaH	-0.57132	1.19368e-06
aphA	0.125995	0.000556599
appA	-0.0485019	0.555725
appB	-0.077468	0.0798199
appC	-0.097275	0.0804342
apt	-0.0301258	0.578447
aqpZ	-0.0866129	0.000780856
araA	NA	NA
araB	NA	NA
araC	0.0606742	0.141529
araE	0.0114699	0.827552
araF	-0.107449	0.267981
araG	-0.112561	0.100181
araH	-0.104001	0.126674
araJ	0.0388032	0.241617
arcA	1.99142	0.526394
arcB	-0.237044	0.209569
argA	0.0110538	0.777667
argB	0.0935388	1.1885e-05
argC	0.0497255	0.0411602
argD	NA	NA
argE	0.0352875	0.339763
argF	0.17638	0.516857
argG	0.0994125	0.000212552
argH	0.106891	2.72232e-05
argO	-0.0184991	0.864217
argP	0.0446255	0.450913
argT	-0.0184116	0.875155
arnT	-0.0097496	0.868556
aroA	-0.123861	0.02044
aroB	0.127906	0.0232137
aroC	-0.153307	0.0100327
aroD	-0.0867017	0.703622
aroE	NA	NA
aroF	0.0408804	0.291203
aroG	-0.0326125	0.678102
aroH	-0.0372395	0.851317
aroL	-0.0753111	0.136891
aroM	0.134163	0.00800012
aroP	0.0209647	0.79749
arpA	0.0371165	0.321516
arsB	0.107429	0.00516674
arsC	0.0652706	0.0906481
arsR	0.0795236	0.0490483
artI	-0.117299	0.0161562
artJ	-0.110587	0.00130791
artM	-0.0517527	0.133861
artP	-0.0754652	0.145225
artQ	-0.0627465	0.161563
ascB	-0.0276951	0.735605
ascF	-0.0367223	0.701572
ascG	0.0208534	0.799552
aslA	0.0805065	0.018002
aslB	0.164132	1.54195e-05
asmA	-0.447247	0.00803716
asnA	0.113421	0.000659736
asnB	-0.0533065	0.162455
asnC	-0.00358332	0.952508
aspA	-0.0270545	0.799757
aspC	-0.627327	0.000331813
asr	-0.0727385	0.29847
astA	-0.152631	8.86605e-06
astB	-0.122291	0.0310424
astC	-0.111727	0.0334187
astD	-0.203623	0.0763618
astE	-0.147726	0.253085
atoA	-0.062454	0.168152
atoB	-0.0375217	0.313719
atoC	-0.0126003	0.835899
atoD	-0.0317154	0.599119
atoE	-0.0416215	0.249455
atoS	-0.0662515	0.208123
atpA	-1.49995	9.32457e-55
atpB	-1.51224	9.63529e-82
atpC	-1.83457	1.05815e-50
atpE	-1.53713	8.77812e-68
atpF	-1.48541	5.08685e-43
atpG	-1.85435	1.18001e-53
atpI	0.0834701	0.0452782
avtA	0.0956108	0.0264468
azoR	-0.109154	0.27929
bacA	0.0685398	0.0137912
baeR	-0.0408556	0.515252
baeS	-0.130928	0.0734273
barA	-0.13754	0.000108385
basR	0.0808499	0.0720986
basS	0.0509503	0.370978
bax	0.120312	0.000332577
bcp	-0.162891	0.00022874
bcr	-0.0354382	0.556722
bcsA	0.140001	3.00493e-06
bcsB	0.0722346	0.055638
bcsC	0.0683318	0.0900846
bcsE	0.0882229	0.104903
bcsF	0.12772	0.000538907
bcsG	0.09323	0.00670792
bcsZ	0.147835	0.000100964
bdm	0.0427793	0.63594
betA	0.0779208	0.136872
betB	-0.217177	0.000808395
betI	0.00854888	0.896431
betT	0.0291893	0.541748
bglA	0.123815	0.00955604
bglB	0.093162	0.0171025
bglF	0.0864173	0.0127929
bglG	0.0357057	0.535166
bglH	0.117121	0.00189847
bglX	-0.0817777	0.214784
bioA	-0.166654	0.0247196
bioB	-0.235412	0.0757461
bioC	-0.173627	0.0128236
bioD	-0.235465	0.0232234
bioF	-0.121136	0.124883
bioH	-0.0190796	0.823661
bipA	-0.0937309	0.504176
blr	-0.0568497	0.672312
bolA	-0.0368402	0.318448
brnQ	0.0277995	0.504443
btuB	0.113856	5.32704e-05
btuC	-0.153265	0.154046
btuD	-0.115993	0.472895
btuE	-0.0687208	0.515568
btuF	-0.0483168	0.442825
btuR	-0.178612	0.00195272
cadA	0.0560068	0.250468
cadB	0.0822907	0.2578
cadC	0.0868607	0.18551
caiA	0.053303	0.0351258
caiB	0.100655	1.55656e-06
caiC	0.0275759	0.374783
caiD	0.0325213	0.187324
caiE	0.41846	0.901994
caiF	0.0235949	0.539796
caiT	0.00360352	0.953769
carA	-3.16705	0.0279078
carB	-3.04731	0.113273
cbl	-0.0639959	0.584661
cbpA	-0.113779	0.00638462
cbpM	-0.0587947	0.0921052
cbrA	0.0741394	0.000467726
cbrC	0.0483133	0.297071
cchA	-0.0389182	0.248342
cchB	-0.0541865	0.0714433
ccmA	-0.0154607	0.82437
ccmB	-0.00338916	0.9553
ccmC	0.0595445	0.287758
ccmD	-0.00570697	0.947435
ccmE	0.0302137	0.617753
ccmF	0.0605455	0.385227
ccmG	0.0395379	0.63594
ccmH	-0.0132885	0.76772
cdaR	0.0219091	0.60355
cdh	0.0792315	0.00651806
cedA	-0.10131	0.145225
cfa	-0.416498	1.3792e-10
chaA	-0.149456	0.125711
chaB	-0.169878	0.00775997
chbA	-0.122731	0.192858
chbC	-0.133855	0.101769
chbF	-0.0713548	0.44236
chbG	-0.150393	0.0101876
chbR	-0.0964904	0.409216
cheA	-0.0997601	0.159288
cheB	-0.0577138	0.269479
cheR	-0.151514	0.000192528
cheW	-0.0418566	0.62811
cheY	-0.127942	0.00502958
cheZ	-0.125513	0.0234982
chiA	-0.00791966	0.910754
chpB	0.146352	0.00130899
chpR	0.0221764	0.728692
chpS	0.227993	0.580373
cirA	-0.0186629	0.724452
citA	-0.0356901	0.686941
citB	-0.0119091	0.881782
citC	-0.0912262	0.588222
citD	0.0982237	0.493835
citE	0.00751792	0.970685
citF	-0.0105417	0.803061
citG	-0.0416026	0.284736
citT	-0.0546656	0.327871
citX	-0.0550975	0.410717
clcA	0.0266363	0.773505
clcB	-0.307806	0.00128064
cld	0.00918079	0.881782
clpA	-0.176552	2.05057e-08
clpB	-0.0112261	0.852087
clpP	0.456412	0.0021007
clpS	-0.126663	0.0219032
clpX	0.694564	5.57236e-06
cls	-0.225097	0.0219354
cmk	0.460107	0.908091
cmr	-0.120731	0.00107569
cmtA	0.0402404	0.573971
cmtB	0.0249981	0.80518
coaE	NA	NA
cobB	-0.168084	0.00972118
cobC	-0.0448659	0.640901
cobS	-0.071259	0.108197
cobT	-0.153365	0.0630325
cobU	-0.051345	0.509725
codA	0.0257642	0.537261
codB	0.0194146	0.735605
cof	-0.0126903	0.743007
copA	-0.0651837	0.0146595
corA	0.00837976	0.930592
cpdA	-0.00357691	0.950524
cpdB	0.0790036	0.00558423
cpsB	-0.104615	0.122431
cpxA	-0.734615	3.68345e-37
cpxP	0.0656155	0.194303
cpxR	0.283921	1.41818e-22
crcA	-0.0132221	0.851708
crcB	-0.0438463	0.380936
creA	0.108999	2.6951e-05
creB	-0.000224046	0.996662
creC	0.096594	0.0040741
creD	0.0459603	0.263199
crl	-0.145872	0.0232234
crp	NA	NA
crr	-0.302084	0.0912145
csdA	-8.62035e-05	0.99836
csgA	-0.0987574	0.384331
csgB	-0.115636	0.0556688
csgD	-0.088728	0.211433
csgE	-0.0869783	0.1453
csgF	-0.11494	0.391272
csiE	0.043299	0.690004
csiR	-0.045015	0.409905
cspA	0.111439	0.000621343
cspB	-0.193535	0.159264
cspC	-0.288044	1.71851e-18
cspD	-0.0479243	0.135089
cspE	-0.110044	0.00682442
cspF	-0.0926169	0.535036
cspG	-0.101965	0.306251
cspH	-0.0604357	0.415507
cspI	0.0678898	0.722307
cstA	-0.0105574	0.881975
cueO	0.0469791	0.24778
cueR	0.00620797	0.886984
cusA	-0.0200494	0.603429
cusB	-0.00447747	0.920728
cusC	0.280314	7.03657e-18
cusR	-0.038588	0.588222
cusS	-0.0079163	0.844637
cutA	0.110773	0.044978
cutC	0.0619553	0.673392
cvpA	-0.0992524	0.408826
cvrA	-0.137104	0.00145086
cyaA	0.195681	0.0397746
cyaY	0.105229	0.0107164
cybB	0.094723	0.491674
cybC	0.0252531	0.50422
cycA	0.0787039	0.0524996
cynR	-0.00248258	0.974662
cynS	0.0666429	0.138539
cynT	0.0332086	0.519143
cynX	0.034072	0.48005
cyoA	-0.0364192	0.159288
cyoB	0.0385585	0.223586
cyoC	-0.00372271	0.901994
cyoD	0.000183193	0.995728
cyoE	-0.00297934	0.928094
cysA	-0.22353	1.9561e-10
cysB	-1.01116	0.0433809
cysC	-0.357212	4.59719e-07
cysD	-0.367054	3.27602e-09
cysE	0.460098	0.937273
cysG	-0.568665	1.62866e-14
cysH	-0.51213	0.000192357
cysI	-0.552906	5.37261e-15
cysJ	-0.627227	3.33576e-25
cysK	-0.520715	1.87105e-05
cysN	-0.329888	5.25912e-14
cysP	-0.167102	4.78059e-06
cysQ	-0.178006	0.505073
cysU	-0.228565	8.63012e-12
cysW	-0.224173	1.72716e-06
cysZ	-0.01557	0.732738
cytR	0.0699149	0.0955791
dacA	0.186982	0.134319
dacB	0.0808535	0.0453999
dacD	-0.0396903	0.566869
dadA	-0.152356	0.000165262
dadX	-0.162528	1.43486e-05
dam	0.0289199	0.910589
damX	0.16186	0.000129165
dapF	NA	NA
dbpA	-0.0846261	0.114657
dcd	-0.281657	6.03199e-60
dcm	0.0041753	0.965967
dcp	0.0751914	0.512524
dcrB	0.032797	0.597279
dctA	0.0724777	0.0738822
dcuA	-0.0406814	0.256621
dcuB	0.0650296	0.0595099
dcuD	0.0444652	0.143746
dcuR	0.0783211	0.0229489
dcuS	0.0155412	0.933255
ddg	-0.0213699	0.769058
ddlA	-0.0241901	0.551126
ddlB	0.0624081	0.09497
ddpA	0.100054	0.320226
ddpB	0.0253128	0.83361
ddpC	0.0235739	0.862494
ddpD	0.0681846	0.459512
ddpF	-0.0523932	0.716554
ddpX	-0.164848	0.372758
deaD	-0.190772	0.00948465
dedA	-0.0446537	0.607607
dedD	0.133123	0.110552
def	0.092096	0.00898913
degP	0.0187004	0.908406
degQ	0.0234618	0.544699
degS	NA	NA
deoA	0.069344	0.0435494
deoB	0.0412632	0.169536
deoC	-0.0040572	0.937273
deoD	0.0717465	0.00185485
deoR	-0.227989	0.0153552
dgkA	-0.0336866	0.847984
dgoA	0.0857328	0.0862618
dgoD	0.100281	0.0532004
dgoK	0.118358	0.0530666
dgoR	0.0815691	0.0158343
dgoT	0.0823333	8.02838e-06
dgsA	-0.133574	0.207154
dgt	0.0448454	0.445512
dhaH	-0.275462	1.28713e-16
dhaK	-0.045084	0.378987
dhaL	-0.150229	0.00631721
dhaR	-0.295046	9.33465e-19
dicB	-0.13301	0.265869
dicC	-0.109317	0.535204
dinB	0.0503932	0.317668
dinD	0.0658934	0.0023204
dinF	0.0689849	0.0187306
dinG	-0.0189731	0.798525
dinI	-0.085764	0.69355
dinJ	0.0282407	0.695829
dipZ	0.0135464	0.910822
djlA	0.0643264	0.00866019
djlB	-0.0176441	0.83968
djlC	-0.0729238	0.179302
dkgA	0.02867	0.630898
dkgB	0.0214392	0.787587
dksA	-1.0287	0.367535
dld	-0.0700215	0.164691
dmsA	-0.0776273	0.00176385
dmsB	-0.107495	1.74803e-06
dmsC	-0.09873	0.0391627
dmsD	-0.150327	0.0309308
dnaB	0.296391	0.00151676
dnaJ	0.00513314	0.974662
dnaK	NA	NA
dnaQ	-0.116875	0.96192
dos	-0.231486	0.241791
dppA	0.101649	0.0314679
dppB	0.14176	5.01112e-05
dppC	0.132957	2.09612e-05
dppD	0.100893	0.00339016
dppF	0.145358	0.000273889
dps	-0.104191	0.234143
dsbB	-1.26662	9.57675e-13
dsbC	0.037218	0.222885
dsbG	-0.0240015	0.662212
dsdA	0.046114	0.544039
dsdC	-0.0523368	0.537875
dsdX	-0.0597875	0.253273
dsrB	-0.0394743	0.518332
dtd	0.0981805	0.00271249
dusB	0.0565858	0.193712
dusC	-0.0391858	0.900654
eaeH	0.00376253	0.970142
eamA	-0.10715	0.314372
ebgA	0.0744827	0.108197
ebgC	0.0292042	0.433693
ebgR	0.0583171	0.442664
eco	-0.0498358	0.356301
ecpD	0.0370237	0.678102
eda	-0.237203	0.00103631
edd	-0.114468	0.0935109
ego	-0.169792	0.138619
elaA	-0.108678	0.00638462
elaB	-0.00821329	0.931518
elaC	-0.00902746	0.884357
elaD	-0.0379643	0.34826
elbA	-0.150554	0.00147724
elbB	NA	NA
emrA	-0.013918	0.728692
emrB	-0.0129289	0.787639
emrD	0.0871746	4.29493e-05
emrE	-0.00580465	0.962744
emrK	0.0411474	0.823811
emrY	-0.0314145	0.686779
emtA	-0.122382	0.00209537
endA	0.0686469	0.0407686
entA	-0.00138168	0.987176
entB	-0.0120394	0.855404
entC	0.00897361	0.878908
entD	0.0324021	0.622535
entE	0.028133	0.55113
entF	0.00743879	0.952508
envC	0.407746	0.176684
envR	0.102604	0.0158343
envY	0.0244253	0.691892
envZ	0.146903	0.666641
epd	0.0165186	0.821497
eptA	0.0907804	0.138859
eptB	0.0751113	0.00483893
erfK	-0.0641918	0.4399
essD	0.0258436	0.806767
etp	-0.105464	0.175863
eutA	-0.00562904	0.8785
eutB	-0.0284199	0.499302
eutC	0.0172871	0.695293
eutE	0.01842	0.711091
eutG	0.0299999	0.465097
eutH	0.0140155	0.770248
eutI	-0.045146	0.0720045
eutJ	0.0170014	0.641589
eutL	-0.000829363	0.984924
eutP	-0.000637216	0.992776
eutQ	-0.0437894	0.105124
eutT	0.0126886	0.724452
evgA	-0.089309	0.423371
evgS	-0.0524458	0.478803
exbB	0.100115	0.0541427
exbD	0.0543055	0.359113
exo	0.031728	0.368161
exoX	-0.0823487	0.245741
exuR	-0.0495333	0.25296
exuT	0.124671	1.43921e-05
fabF	-0.153002	0.000247735
fabH	NA	NA
fabR	0.128189	0.197534
fadA	0.0585717	0.146668
fadB	0.121693	0.00229428
fadD	-0.113528	0.00923704
fadE	-0.0110911	0.801339
fadH	0.0881325	0.160568
fadL	-0.102981	0.0221498
fadR	-0.197256	1.16561e-13
fbaB	0.0547212	0.597572
fbp	0.0500826	0.521956
fcl	-0.0442562	0.314113
fdhD	0.0530391	0.306251
fdhE	0.0405398	0.211132
fdhF	0.0309215	0.530369
fdnG	-0.113731	0.105678
fdnH	0.0348854	0.659679
fdnI	0.0186653	0.812604
fdoG	0.0922022	0.00346546
fdoI	0.136452	0.00489721
fdrA	0.0280008	0.6784
fdx	-0.0345358	0.881336
feaB	-0.0506324	0.28457
feaR	0.0230218	0.848771
fecA	0.0612029	0.0314343
fecB	0.0639364	0.0415959
fecC	0.106257	0.00665859
fecD	0.01237	0.854385
fecE	0.0683337	0.0650171
fecI	0.0777697	0.025417
fecR	0.0518114	0.194303
feoA	0.111425	0.135122
feoB	0.158715	0.0594376
fepA	-0.0643765	0.138435
fepB	NA	NA
fepD	NA	NA
fepE	-0.0644615	0.312923
fepG	-0.156428	0.246152
fhiA	0.140476	1.97094e-05
fhlA	-0.0385814	0.503447
fhuA	0.0854401	0.292458
fhuB	-0.0317537	0.60583
fhuC	0.0746595	0.0415959
fhuD	0.0648925	0.167048
fhuE	-0.152456	1.47532e-09
fhuF	0.0476407	0.372585
fic	0.0452133	0.164798
fieF	0.0419151	0.534902
fimA	0.142655	0.000163333
fimB	0.106726	0.0216648
fimC	0.054935	0.209569
fimE	0.0137507	0.865923
fimF	0.171781	3.0984e-05
fimG	0.0917128	0.0543692
fimH	0.114005	0.00284017
fimI	0.0695148	0.268272
fimZ	-0.00455368	0.973516
fis	-0.206894	0.00195354
fiu	0.0796768	0.0827457
fixA	0.0302602	0.38617
fixB	0.0268232	0.380823
fixC	0.0382549	0.347707
fixX	0.0744113	0.0759858
fklB	0.0965255	0.0822798
fkpA	0.0763544	0.0251154
fkpB	0.0556006	0.0382355
fldB	0.0258895	0.603229
flgB	-0.169278	0.010259
flgC	-0.104873	0.0244766
flgD	-0.133743	4.30816e-05
flgE	-0.0845783	0.0157817
flgF	-0.126478	0.000633568
flgG	-0.115483	0.0203594
flgH	-0.127776	0.00490794
flgI	-0.120382	0.0137774
flgJ	-0.121368	0.15241
flgK	-0.0979872	0.0677691
flgL	-0.220004	0.00516589
flgN	-0.149043	5.6279e-09
flhA	-0.121882	0.0410326
flhB	-0.0595458	0.49339
flhE	0.00055359	0.996498
fliA	-0.23366	0.040138
fliC	-0.0617969	0.442968
fliD	-0.10488	0.445512
fliE	-0.147242	0.198829
fliF	-0.00481941	0.974231
fliG	-0.0496797	0.545773
fliH	-0.0783148	0.214784
fliI	-0.046469	0.750926
fliJ	-0.164868	0.544662
fliK	-0.146498	0.106662
fliL	-0.0364851	0.830532
fliM	-0.0995063	0.277641
fliN	-0.0235493	0.819975
fliO	-0.0369179	0.7676
fliP	-0.0522544	0.615913
fliQ	-0.105493	0.0971116
fliR	0.0201122	0.904088
fliS	0.0484791	0.794804
fliT	0.0154099	0.881155
fliY	-0.094885	0.073467
fliZ	-0.0712477	0.231841
flk	-0.0693705	0.327465
flu	-0.0820953	0.250174
flxA	-0.0652559	0.189415
fnr	-0.313885	0.0452782
focA	-0.0279069	0.6784
focB	-0.0707119	0.458474
folA	NA	NA
folB	NA	NA
folC	NA	NA
folE	NA	NA
folK	NA	NA
folM	-0.0861807	0.429254
folX	-0.058207	0.538216
fpr	0.0922365	0.0021007
frc	0.0490856	0.675539
frdA	0.0495216	0.366072
fre	0.197238	1.4181e-06
frlA	0.0549021	0.544699
frlB	0.0403508	0.379115
frlC	0.105029	0.00103387
frlD	0.0961051	0.000148994
frlR	0.000845495	0.992088
frmA	-0.010337	0.839374
frmB	0.00383812	0.955584
frmR	0.00882548	0.877341
frsA	-0.416746	5.39864e-06
fruA	0.0035731	0.9553
fruB	-0.00988322	0.917459
fruK	-0.102321	0.136471
fruR	-0.138047	0.356065
frvA	0.11455	0.00229428
frvB	0.0517399	0.198488
frvX	0.0590008	0.0665202
frwB	0.0723465	0.00680545
frwC	0.0587856	0.0548468
frwD	0.0990491	0.00103387
fsaA	-0.0487075	0.367535
fsaB	0.102622	7.94959e-05
fsr	-0.0212363	0.617753
ftn	-0.0327173	0.904672
ftsB	0.296797	0.88162
ftsE	0.0703681	0.825086
ftsN	-0.106759	0.45589
ftsX	0.249842	0.11565
fucA	0.0103366	0.770248
fucI	-0.0301365	0.32982
fucK	0.0407069	0.252166
fucO	0.0463592	0.120479
fucP	0.0419321	0.342402
fucR	-0.0257345	0.509725
fucU	0.0127614	0.731794
fumA	-0.0350216	0.728692
fumB	0.110018	0.0017804
fumC	-0.071283	0.320693
fur	0.00878887	0.984009
fxsA	0.0919856	0.0955561
gabD	0.00446115	0.960019
gabP	0.00299128	0.981185
gabT	-0.0267414	0.571835
gadC	0.070645	0.288964
gadE	-0.0295474	0.446005
gadW	0.149463	1.4181e-06
gadX	0.135554	1.28889e-05
galE	-0.00692394	0.936817
galF	-0.00675408	0.935777
galK	-0.0170579	0.881782
galM	-0.00770027	0.931819
galR	0.0133888	0.65576
galS	-0.0777736	0.299123
galT	-0.00946737	0.876403
galU	NA	NA
gapA	-0.11902	0.0989101
garD	0.111432	0.0370016
garK	0.0515717	0.284736
garL	0.0499568	0.187959
garP	0.0276443	0.544039
garR	0.0891798	0.189112
gatC	0.00296053	0.9553
gatD	-0.0116362	0.83539
gatY	0.0413384	0.389992
gatZ	-0.0386579	0.49539
gcd	0.0303265	0.63594
gcl	0.0041314	0.931605
gcvA	-0.161661	0.125233
gcvH	0.321304	0.0754924
gcvP	0.184665	0.0912145
gcvR	-0.205693	0.000761601
gcvT	0.300455	0.0017804
gdhA	-0.145087	0.00989701
ggt	0.163609	2.10226e-06
gidA	-0.0295612	0.965967
gidB	0.021855	0.854423
glcB	-0.0100751	0.833507
glcC	0.0558688	0.291203
glcD	0.0334262	0.449155
glcE	0.0856777	0.011078
glcF	0.0587982	0.151594
glcG	0.0336762	0.474383
gldA	0.0661202	0.0558618
glf	-0.0235634	0.87649
glgA	0.115919	0.021056
glgB	5.99255e-05	0.999497
glgC	0.0630492	0.231841
glgP	0.084409	0.154094
glgS	0.0862494	0.1379
glgX	0.156208	1.24882e-07
glk	0.0234002	0.728437
glmM	-0.29033	0.778509
glnB	-0.186086	0.002314
glnD	-0.310096	4.19761e-09
glnE	0.0505277	0.224404
glnG	0.060243	0.493448
glnH	-0.00548744	0.963014
glnK	-0.0637334	0.233384
glnL	0.0658195	0.164363
glnP	-0.131006	0.131997
glnQ	-0.0201364	0.746438
gloA	-0.431213	0.103559
gloB	0.0504542	0.623662
glpA	0.00321913	0.965967
glpB	0.00943616	0.901994
glpC	0.00953105	0.837186
glpD	0.0872469	3.94726e-05
glpE	0.0993242	0.00177058
glpF	0.0337955	0.288675
glpG	0.105322	0.00287166
glpK	0.0633321	7.94959e-05
glpQ	0.00589438	0.927783
glpR	0.179883	0.0155166
glpT	0.0320503	0.415301
glpX	0.0529743	0.217697
gltA	0.0136975	0.888052
gltD	-0.0895496	0.00023556
gltF	0.0646458	0.524924
gltI	-0.126831	0.000645731
gltJ	0.0283221	0.658549
gltK	0.0207693	0.843369
gltL	-0.0494316	0.293721
gltP	0.116329	6.10588e-06
gltS	0.0457172	0.0251554
glvB	0.0647258	0.00167723
glvC	0.287699	1.56259e-61
glvG	0.121664	1.57154e-13
glxK	0.0508335	0.666511
glxR	-0.0280989	0.728692
glyA	1.03718	0.816702
gmd	0.00245484	0.975463
gmhB	-1.27112	0.76772
gmr	-0.16214	0.282535
gnd	-0.0397153	0.66542
gnsA	NA	NA
gntK	0.056273	0.448605
gntP	0.0767916	0.235173
gntR	0.169908	0.0878365
gntT	0.0831102	0.0336573
gntU	0.0672394	0.21874
gntX	-0.0776441	0.293958
gntY	0.00488879	0.981185
gor	0.066974	0.380688
gph	0.0793534	0.00104538
gpmA	-0.101681	0.141755
gpp	0.148734	8.72296e-16
gpt	0.0390628	0.597716
greA	-0.128988	0.0798199
greB	0.0506734	0.505073
groL	NA	NA
grxA	-0.0656769	0.104148
grxB	-0.0984365	0.00903093
grxC	0.0628615	0.00989512
gshA	-0.0629413	0.366722
gshB	0.0608099	0.350878
gsk	-0.0313424	0.368174
gspA	0.102637	0.00898913
gspC	0.095983	0.0409607
gspD	0.0846857	0.0253136
gspE	0.0143066	0.901872
gspG	-0.0409781	0.781361
gspH	0.0438487	0.373126
gss	0.0474784	0.24778
gst	-0.174514	0.0198592
guaA	NA	NA
guaB	NA	NA
guaC	-0.0179449	0.703703
guaD	-0.0269903	0.504834
gudD	-0.0291911	0.562153
gudP	0.0179565	0.658535
gudX	-0.0193122	0.544039
gutM	-0.0591021	0.658357
gutQ	-0.0983659	0.247359
hcaB	0.00310328	0.975447
hcaC	-0.0347946	0.711091
hcaD	0.00865199	0.922629
hcaE	0.0206941	0.812672
hcaF	-0.00275386	0.977958
hcaR	-0.091505	0.255133
hcaT	-0.0364902	0.548916
hchA	-0.0359686	0.63594
hcp	-0.0620543	0.136471
hcr	-0.127342	0.000280025
hda	-1.14266	0.607396
hdeA	0.145295	6.96359e-05
hdeB	0.0939445	0.02001
hdeD	0.119205	0.0014746
hdfR	-0.211548	0.000901295
hdhA	-0.166802	0.00109006
helD	-0.0865498	0.00989512
hemF	-0.00406951	0.94472
hemG	0.685526	0.504621
hemN	0.0653764	0.242773
hemX	0.0258302	0.710595
hemY	0.136285	0.00680545
hepA	-0.103279	6.70147e-13
hflC	0.117226	0.00201811
hflD	-0.30155	1.02273e-08
hflK	0.0962448	0.0234982
hflX	0.0951357	0.0308007
hfq	-0.694044	0.901994
hha	0.0397736	0.354737
hinT	-0.157498	0.0011856
hipA	-0.235409	0.294855
hipB	-0.165725	0.237414
hisA	-0.00877774	0.916587
hisB	-0.00426988	0.956891
hisC	-0.0679369	0.239592
hisD	-0.043273	0.468126
hisF	-0.048175	0.343582
hisH	-0.00820935	0.897918
hisI	-0.0706179	0.0731817
hisJ	-0.0563253	0.561519
hisL	-0.00250512	0.974662
hisM	-0.110241	0.128055
hisP	-0.0890327	0.32608
hisQ	-0.189348	0.00615288
hlpA	-0.128288	0.0130245
hlyE	-0.0795976	0.334243
hmp	-0.0247158	0.652376
hns	0.181907	0.901994
hofB	-0.0032653	0.963014
hofC	0.0178853	0.679314
hofQ	0.200887	2.88189e-16
hokA	0.0964479	0.000290684
hokB	-0.0233718	0.849762
hokC	0.0679921	0.105974
hokD	-0.0381782	0.724607
hokE	0.0219572	0.714435
holC	-0.504449	0.596643
holD	NA	NA
holE	-0.101026	0.221395
hpt	-0.0292631	0.435784
hrpA	0.169943	0.614771
hrpB	0.0941835	0.0590837
hscA	-0.0763549	0.663279
hscB	-0.0738187	0.623662
hscC	0.113148	0.0178175
hsdM	0.0674734	0.248791
hsdR	0.0319492	0.695257
hsdS	0.0689886	0.166201
hslJ	0.0590588	0.578412
hslO	0.147613	4.09208e-08
hslR	0.0662329	0.0755742
hslU	0.041735	0.087737
hslV	0.078471	0.016403
hsrA	0.0324052	0.517828
htgA	0.0380909	0.191213
htpG	0.000787542	0.987964
htpX	-0.123302	0.000475764
htrC	-0.0133364	0.83968
htrE	0.0868477	0.248791
htrG	0.106993	0.000165262
hupA	-0.239968	3.25718e-32
hupB	-0.182964	9.33781e-13
hyaA	-0.07088	0.672167
hyaB	-0.0422153	0.566869
hyaC	-0.151043	0.0452782
hyaD	-0.141293	0.0914624
hyaE	-0.223359	6.62262e-05
hyaF	-0.0762002	0.184713
hybA	0.0264039	0.521956
hybB	0.0720763	0.109069
hybC	0.0107719	0.848771
hybD	0.035653	0.41124
hybE	0.0514595	0.260704
hybF	0.0325993	0.702711
hybG	0.0669956	0.146668
hybO	0.0243744	0.630174
hycA	0.0321661	0.578412
hycB	0.0479588	0.359453
hycC	0.00777823	0.900654
hycD	0.0179655	0.803061
hycE	-0.0210862	0.76772
hycF	0.0115316	0.849762
hycG	-0.0233956	0.629013
hycH	-0.00811854	0.904088
hycI	-0.00173883	0.981185
hydN	0.0201461	0.723133
hyfA	0.013767	0.779342
hyfB	0.0516296	0.249455
hyfC	-0.0578072	0.0439018
hyfD	-0.0310556	0.391537
hyfE	-0.00767865	0.876403
hyfF	0.00685936	0.89208
hyfG	-0.0152456	0.740999
hyfH	-0.0567658	0.0938023
hyfI	0.0104808	0.935322
hyfJ	0.00797173	0.9553
hyfR	0.0267073	0.855404
hyi	-0.0275954	0.573729
hypA	-0.00289762	0.971343
hypB	0.0377187	0.409048
hypC	-0.0188405	0.722307
hypD	0.0378258	0.43932
hypE	-0.0210305	0.731977
hypF	0.109193	0.0699814
hyuA	0.0581256	0.0543692
iaaA	-0.0688844	0.224414
iadA	-0.0125887	0.824262
iap	0.0697067	0.136863
ibpA	0.0757634	1.23629e-05
ibpB	0.0951205	0.00743513
icd	-0.0972056	0.629034
icdC	-0.136421	0.0165845
iclR	0.0689054	0.0624733
idi	0.00429441	0.928094
idnD	0.0560002	0.300633
idnK	0.0558557	0.184648
idnO	0.0800756	0.0605049
idnR	0.0383606	0.36167
idnT	0.0965352	0.0111357
ihfA	NA	NA
ihfB	-1.18457	0.728692
ileS	NA	NA
ilvA	0.105563	0.0115511
ilvB	0.0671509	0.00131051
ilvD	0.0975058	0.000913286
ilvE	0.0966284	9.67569e-06
ilvH	0.0516667	0.0415959
ilvI	0.0596873	0.179302
ilvL	0.102619	1.08846e-05
ilvM	0.0905793	0.00118388
ilvN	0.074928	3.61304e-06
ilvY	0.0723286	0.061296
inaA	-0.0142351	0.803061
intA	-0.014314	0.675709
intB	0.0728019	0.128513
intD	0.00831119	0.963014
intE	-0.266818	0.000145586
intF	0.132351	0.421733
intQ	-0.0447234	0.834141
intR	-0.0175228	0.768982
intS	-0.0995369	0.224414
iscA	-0.13911	0.449814
iscR	-0.149746	8.58864e-07
iscS	-0.694044	0.901994
iscU	-0.199251	0.367619
ispA	NA	NA
ispU	NA	NA
ivbL	0.086586	8.60673e-08
ivy	0.012068	0.797097
katE	-0.0195509	0.920553
katG	0.0511246	0.206879
kbaY	-0.0392096	0.366546
kbaZ	0.075289	0.147479
kbl	-0.0329506	0.397426
kch	-0.13273	0.0427413
kdgK	0.136815	0.000114676
kdgR	-0.0840956	0.205835
kdgT	0.0587086	0.0690323
kdpA	-0.00558808	0.951816
kdpB	-0.0484988	0.305762
kdpC	-0.03062	0.520269
kdpD	-0.247611	0.00592442
kdpE	-0.00333168	0.977583
kdpF	0.0778819	0.406792
kdsC	0.0352508	0.380799
kdsD	0.0522336	0.10943
kduD	-0.0368251	0.622535
kduI	0.0400544	0.233155
kefB	0.162901	1.71369e-10
kefC	0.0614832	0.0152624
kefF	0.0512904	0.0382355
kefG	0.113475	0.0101466
kgtP	0.052967	0.362789
kil	1.13181	0.149874
kptA	0.0847724	0.251021
ksgA	-0.211847	0.0818631
lacA	0.0156292	0.812303
lar	0.00613765	0.977958
ldcA	-1.0237	0.0123994
ldcC	-0.00264502	0.953769
ldhA	-0.0838121	0.306251
lepA	-0.256231	0.49339
leuA	0.0414305	0.114877
leuB	0.0495509	0.330613
leuC	0.039029	0.155115
leuD	0.0371766	0.545674
leuL	0.0750184	0.02001
leuO	0.0365044	0.371103
lhr	-0.16715	0.0340413
ligB	0.00213458	0.967806
ligT	0.00777754	0.873102
lipA	-0.107968	0.957009
lipB	-0.25115	0.354737
lit	0.297654	0.0135777
livF	0.0399982	0.443795
livG	0.0402595	0.434622
livH	0.0872996	0.109734
livJ	0.0563447	0.364563
livK	0.0877489	0.267876
livM	0.0478548	0.372585
lldD	0.109349	7.22873e-05
lldP	0.0225294	0.664218
lldR	0.0881748	0.00523839
lon	0.490828	2.8907e-09
lpcA	-0.694044	0.901994
lpd	NA	NA
lplA	0.0446978	0.351994
lpp	-0.639585	1.5712e-11
lpxA	0.11636	0.318448
lrp	0.251945	0.000341593
lsrB	-0.0865331	0.782413
lsrC	-0.231127	0.062278
lsrD	-0.106183	0.630174
lsrF	-0.161121	0.0227644
lsrG	0.0666874	0.62811
ltaE	-0.141381	8.40266e-05
luxS	-0.0849262	0.462683
lysA	0.08768	0.00463234
lysC	0.0745661	0.0958462
lysP	-0.0495662	0.48667
lysR	0.0421764	0.25383
lysS	-0.241096	0.000500118
lysU	0.113245	0.0233022
lyxK	0.137794	1.56956e-07
maa	-0.0363352	0.599986
macA	-0.0978591	0.105819
macB	-0.0721396	0.0144749
maeB	-0.0361431	0.342768
mak	-0.0305072	0.470754
malE	0.0865617	0.000531645
malG	0.0821292	0.0591658
malI	0.00985651	0.959791
malK	0.0851079	0.00076409
malM	0.0630172	0.0247924
malP	0.0486648	0.467888
malQ	0.0714971	0.165535
malS	0.129976	2.88294e-07
malT	0.0801982	0.0590837
malX	-0.125923	0.209364
malY	-0.190225	0.00860119
malZ	-0.0127966	0.812604
manA	-0.0314695	0.767095
manX	-0.0638824	0.535204
manY	-0.0723933	0.629377
manZ	-0.0724545	0.18018
maoC	-0.00929078	0.901994
marA	-0.123862	0.432277
marC	-0.0953353	0.599119
marR	-0.00471454	0.972669
mazG	0.0387079	0.359453
mbhA	0.0366305	0.55113
mcrA	0.0355915	0.726212
mcrB	0.112701	0.241268
mcrC	0.0430888	0.503487
mdaB	0.105224	0.0089043
mdh	0.189125	0.000279938
mdlA	0.0187661	0.594826
mdlB	0.00601458	0.923393
mdoB	0.0703163	0.121474
mdoC	-0.147557	0.000389973
mdoD	-0.00915538	0.935777
mdoG	0.0559087	0.128063
mdoH	0.0922122	0.0098536
mdtA	-0.0394399	0.3402
mdtB	0.0440479	0.269473
mdtC	0.0218977	0.658549
mdtD	-0.0382995	0.710595
mdtE	-0.155583	0.000505453
mdtF	-0.152136	2.01721e-06
mdtG	-0.129847	0.0381726
mdtH	-0.094553	0.140129
mdtI	-0.144758	0.0467106
mdtJ	-0.172015	0.0243163
mdtK	-0.238004	4.86818e-05
melA	0.108579	0.00262327
melB	0.129344	0.000517779
melR	0.0791189	0.202269
menA	-0.0442816	0.342768
menB	9.74765e-05	0.998693
menD	-0.0134058	0.787917
menE	-0.0256311	0.709979
menF	-0.0392102	0.523952
mepA	0.00400564	0.970611
metA	0.0740171	0.00674937
metB	0.0527651	0.0918509
metC	0.0157977	0.717535
metE	0.0893635	0.00342092
metF	-0.0714668	0.10451
metH	0.0709462	0.0360738
metI	-0.0383818	0.567375
metJ	-1.22493	0.0229489
metL	-1.24026	4.53496e-20
metN	-0.0143371	0.774522
metQ	NA	NA
metR	0.101463	0.00167543
mfd	-0.233794	6.02382e-17
mglA	0.0793016	0.438639
mglB	-0.153116	0.220086
mglC	-0.0335204	0.687399
mgsA	-0.0800348	0.0135166
mgtA	0.0345437	0.748613
mhpA	0.0378663	0.351019
mhpB	0.0156594	0.812604
mhpC	0.0315755	0.678102
mhpD	0.0412495	0.283952
mhpE	0.0351928	0.391394
mhpF	0.0255108	0.618121
mhpR	0.10518	0.00805775
mhpT	0.0715311	0.0813989
miaA	-0.197365	0.4399
miaB	-0.0669705	0.0366473
minC	0.131078	0.0578455
minD	0.19693	3.00493e-06
minE	0.245427	2.23716e-07
mioC	0.150454	1.4333e-05
mipA	-0.145275	0.00406111
mlrA	-0.0314903	0.721514
mltB	-0.047938	0.388788
mltC	0.0251954	0.658357
mltD	0.00635053	0.954714
mmuM	0.224743	0.255133
mmuP	0.155572	0.385864
mngA	-0.0943624	0.0862618
mngB	-0.0529312	0.631005
mngR	-0.0725302	0.405719
mntH	-0.163525	0.00207651
mntR	-0.0567531	0.418874
moaA	-0.0459863	0.448991
moaB	0.0113738	0.901678
moaC	-0.0918313	0.17825
moaD	-0.0842847	0.250005
moaE	0.0135627	0.88995
mobB	0.0715866	0.0350484
modA	-0.0738298	0.459936
modB	-0.0578236	0.431067
modC	-0.0199669	0.841631
modE	-0.0178743	0.864217
modF	0.0365073	0.603429
moeA	-0.0782057	0.269162
moeB	-0.134058	0.110966
mog	0.0627823	0.271634
motA	-0.0757712	0.435701
motB	-0.107249	0.136913
mpaA	-0.020839	0.831863
mpl	0.0414825	0.269479
mppA	0.0405189	0.837163
mprA	-0.0273561	0.499302
mqo	-0.0228682	0.607607
mraW	-0.11332	0.24778
mraZ	0.00118857	0.9805
mrcA	-0.0322851	0.502624
mrcB	-0.314325	0.00188333
mreD	NA	NA
mrp	0.0282904	0.768982
mrr	0.012882	0.816351
mscL	0.0208411	0.506499
msrA	0.0970709	0.00271549
msyB	-0.188306	2.10706e-09
mtgA	0.0508964	0.154094
mtlA	0.0788966	0.0289217
mtlD	-0.014784	0.640243
mtlR	0.11842	0.000217916
mtr	0.0218188	0.758112
murP	-0.00472585	0.935777
mutH	-0.595026	0.37384
mutL	NA	NA
mutM	0.06521	0.00487965
mutS	NA	NA
mutT	NA	NA
mutY	0.022163	0.672167
mviM	-0.0923085	0.00674376
nac	-0.04107	0.476838
nadA	-0.458009	0.0118008
nadB	-0.394108	1.24882e-07
nadC	-0.313732	9.55725e-07
nadR	0.160672	2.72232e-05
nagA	0.217953	0.423113
nagB	-0.168383	2.25691e-10
nagC	0.243835	0.924905
nagD	-0.0845464	0.0429442
nagE	-0.0638017	0.115672
nagZ	-0.137532	0.0600711
nanA	0.0666109	0.166237
nanE	0.0776311	0.016403
nanR	0.0348713	0.399154
nanT	0.0490607	0.136913
napA	-0.0341888	0.359453
napB	-0.0392189	0.371894
napC	-0.00861768	0.881975
napD	-0.0497498	0.320693
napF	-0.051641	0.424392
napG	0.0240334	0.653293
napH	0.0215625	0.636082
narG	-0.136161	0.0413109
narH	-0.15789	0.000124807
narJ	-0.15007	0.00670792
narK	-0.183398	0.0229489
narL	-0.15157	0.00912889
narQ	-0.066673	0.142364
narU	0.0869114	0.653077
narV	0.0172078	0.883163
narW	-0.0005418	0.996662
narX	-0.21926	0.000861297
narY	0.110676	0.313605
narZ	-0.021548	0.867515
ndh	-0.0894937	0.49339
ndk	-0.057473	0.761737
nemA	-0.184166	0.0869409
nfi	0.0991816	0.0347928
nfo	-0.035588	0.524584
nfrA	0.0175089	0.874489
nfrB	0.0588482	0.399465
nfsA	-0.115433	7.70306e-05
nhaA	0.186047	0.321621
nhaB	-0.210385	1.93953e-05
nhaR	-0.0289494	0.515252
nhoA	-0.0580812	0.509356
nikA	0.0904193	0.0559372
nikB	0.0876487	0.0318223
nikC	0.0812359	0.0799986
nikD	0.205412	0.00712939
nikE	0.0256806	0.631039
nikR	0.153794	6.76608e-05
ninE	0.131358	0.511913
nirB	0.0261454	0.485608
nirC	0.0651097	0.0107773
nirD	0.0798622	0.00608712
nlpA	0.0640673	0.00674937
nlpB	-0.00297567	0.942225
nlpC	-0.202596	0.0855379
nlpD	-0.243679	1.91546e-11
nlpE	-0.00869083	0.908827
nlpI	-0.463415	0.000420179
nmpC	0.21941	1.02962e-05
norR	-0.0688737	0.140129
norV	-0.0316714	0.710595
norW	0.0310397	0.44887
npr	-0.106386	0.000864271
nrdD	-0.0649652	0.265597
nrdE	0.0105729	0.901994
nrdF	-0.0252832	0.640299
nrdG	-0.0757599	0.115423
nrdH	0.0751054	0.00972118
nrdI	-0.04406	0.384331
nrfA	0.105032	1.54195e-05
nrfB	0.0993305	0.000282585
nrfC	0.109145	3.65999e-06
nrfD	0.109865	9.65224e-07
nrfE	0.111231	0.000517328
nrfF	0.105325	0.000282092
nrfG	0.0992391	5.85997e-05
nth	-0.0665352	0.661844
nudB	-0.226925	0.787917
nudC	0.0641974	0.0158038
nudD	-0.0342787	0.295634
nudF	0.0494122	0.246217
nudG	-0.128686	0.134319
nudH	-0.150934	0.815783
nuoA	-0.0809928	0.351285
nuoB	0.056413	0.562079
nuoC	-0.0507912	0.554602
nuoE	0.0782901	0.594783
nuoG	-0.00124089	0.989598
nuoH	0.0320402	0.734262
nuoI	NA	NA
nuoJ	0.111513	0.517575
nuoM	-0.160587	0.263433
nuoN	-0.024071	0.787917
nupC	-0.031311	0.515252
nupG	0.0689162	0.321621
nusB	-0.240724	0.748613
ogrK	-0.0823282	0.00874463
ogt	-0.0977665	0.278052
ompA	-0.618898	0.0292767
ompC	0.0380809	0.965967
ompF	0.11297	0.0334187
ompG	-0.206656	0.0813989
ompL	0.0553646	0.0722804
ompN	-0.193827	0.106114
ompR	1.35878	0.521956
ompT	0.0716227	0.238212
ompW	-0.205291	0.000485995
ompX	-0.0985035	0.119827
oppB	-0.0598187	0.379429
oppC	-0.112914	0.0989101
oppD	-0.142004	0.00236762
oppF	0.00939039	0.918132
osmB	-0.106659	0.44992
osmC	-0.00636269	0.965967
osmE	-0.112509	0.308485
osmY	0.0550716	0.11565
otsA	-0.113948	0.193712
otsB	-0.0299893	0.635435
oxc	-0.0964563	0.375059
oxyR	0.0954928	0.795263
paaA	-0.0541748	0.207541
paaB	-0.0104272	0.889839
paaC	0.0224659	0.762959
paaD	-0.0837356	0.113779
paaE	0.0257163	0.881975
paaF	-0.0171593	0.683618
paaG	-0.0196902	0.840228
paaH	-0.0189824	0.769058
paaI	-0.0428943	0.619806
paaJ	0.113823	0.189587
paaK	0.000728221	0.995882
paaX	0.0649466	0.548311
paaY	0.0169431	0.945813
pabA	0.0870208	0.00764895
pabB	-0.0698833	0.0733727
pabC	-0.049264	0.405856
pal	-0.722536	0.0449067
panB	-0.170557	0.0124735
panC	-0.167438	0.000138657
panD	-0.162652	4.29132e-11
panE	-0.134979	1.20102e-05
panF	0.0560067	0.122671
pbl	-0.0924031	0.111015
pbpC	-0.0320839	0.400666
pbpG	0.0400095	0.464591
pck	0.0952863	0.00353942
pcm	-0.015886	0.835629
pcnB	-0.0286892	0.759385
pdhR	-0.0348659	0.691687
pdxA	-0.806696	1.86971e-14
pdxB	-0.575239	0.367647
pdxJ	-0.740242	0.00750774
pdxK	-0.0122628	0.728692
pdxY	-0.301342	0.191077
pepA	-0.00284848	0.959791
pepB	0.0582592	0.429254
pepD	0.0896926	0.182775
pepE	0.121449	2.25618e-07
pepN	-0.135634	0.08528
pepP	0.0343416	0.530369
pepQ	0.0952652	0.000190936
pepT	-0.375677	4.3531e-26
perR	0.460098	0.937273
pfkA	-0.838166	1.46116e-12
pfkB	-0.126783	0.0701002
pflA	-0.30628	2.0256e-09
pflB	-0.360783	7.2264e-21
pflC	0.0713904	0.0116025
pflD	0.0621549	0.0278091
pfs	-0.49822	0.789312
pgi	-1.72082	1.40122e-08
pgm	-0.155976	0.331438
pgpA	0.242115	0.67292
pgpB	-0.257777	0.433693
pheA	0.0585256	0.393448
pheL	0.0397316	0.542382
pheP	-0.049623	0.219114
phnB	0.0760626	0.0269116
phnC	0.1181	0.00150169
phnD	0.143661	3.49064e-10
phnE	0.103871	0.000495035
phnF	0.124053	0.000154769
phnG	0.118865	0.00128064
phnH	0.0739918	0.0136329
phnI	0.102129	0.00217062
phnJ	0.105762	0.00773218
phnK	0.103479	0.000330515
phnL	0.0843783	0.00515453
phnM	0.0805118	0.0389504
phnN	0.127067	0.000158573
phnO	0.0816167	0.00424114
phnP	0.0812294	0.0334187
phoA	-0.0322204	0.43317
phoB	0.0208812	0.508215
phoE	-0.00810342	0.92043
phoH	-0.0579305	0.0989101
phoP	-1.30197	0.247359
phoQ	-0.694044	0.901994
phoR	-0.0367573	0.340477
phoU	0.0736892	4.66134e-06
php	0.0648971	0.0803961
phr	-0.0104226	0.874489
pin	0.122578	0.130733
pinH	-0.105101	0.312752
pinQ	-0.0242269	0.942647
pioO	0.0887574	0.00692724
pitA	-0.0727656	0.0985894
pitB	0.0734257	0.108539
pldA	0.0700679	0.190369
pldB	0.0556907	0.275159
plsB	0.113044	0.477071
plsX	-0.0879607	0.0034822
pmbA	0.0897853	0.0175033
pmrD	-0.0294242	0.544561
pncA	-0.0551011	0.32982
pncB	-0.0934838	0.132643
pnp	-0.121801	0.0385454
pntA	-0.128599	0.113273
pntB	-0.129933	0.121474
pnuC	0.00800719	0.933535
polA	0.118809	0.0468173
polB	0.105016	0.0155893
potA	-0.15086	0.0463131
potB	-0.10249	0.00185485
potC	-0.170434	0.000123045
potD	-0.108677	0.00692599
potE	-0.0665325	0.209569
potF	-0.138471	0.0181691
potG	-0.118084	0.0017166
potH	-0.0712368	0.192677
potI	-0.0904149	0.075993
poxA	-0.238414	0.000420179
poxB	-0.0671468	0.0623236
ppc	-0.579275	1.09802e-20
ppdA	-0.0947582	0.000916282
ppdB	-0.139512	2.79445e-08
ppdC	-0.0471747	0.131054
ppdD	0.0540409	0.354793
pphA	-0.0700393	0.400526
pphB	0.0101153	0.885638
ppiA	0.072802	0.00822568
ppiB	0.0432636	0.515252
ppiD	-0.0401502	0.360912
ppk	0.0327444	0.964635
pppA	0.00512571	0.93704
pps	-0.0812471	0.44887
ppx	-0.104493	0.290784
pqiA	-0.132303	0.179295
pqiB	-0.0870792	0.278307
pqqL	-0.0292623	0.75537
prc	-0.82638	2.7726e-14
prfC	-0.35817	1.70493e-13
prfH	0.0351343	0.509988
priA	0.188467	5.73549e-05
priB	NA	NA
priC	-0.035639	0.277751
prkB	-0.00355462	0.955075
prlC	0.0702916	0.026809
prmA	0.0481851	0.145225
prmB	-1.09769	0.29102
prmC	NA	NA
proA	-0.0416163	0.594489
proB	0.0570001	0.368174
proC	-0.00161803	0.996368
proP	0.0758039	0.166334
proQ	-0.62977	1.27485e-82
proV	-0.0474371	0.294855
proW	-0.0411946	0.45873
proX	-0.0170539	0.842648
proY	0.0291624	0.342528
prpB	-0.406239	5.81913e-12
prpC	-0.144524	0.11565
prpD	-0.0740983	0.257984
prpE	-0.203745	0.000899989
prpR	-0.346456	1.05436e-10
psiF	0.034453	0.518712
pspA	0.0240716	0.530369
pspB	-0.0743612	0.21044
pspC	-0.0771741	0.104687
pspD	0.00739775	0.962744
pspE	-0.0273584	0.700438
pspF	-0.142383	0.00898913
pstA	0.29553	0.465583
pstB	0.115538	0.0050893
pstS	0.0164523	0.901994
pta	-0.587353	0.31022
ptr	-0.0167059	0.677669
ptrB	NA	NA
ptsA	0.129773	3.87559e-07
ptsG	-0.666846	4.94384e-104
ptsI	-0.813885	0.378302
ptsN	0.175549	4.78194e-10
ptsP	-0.105694	0.00478892
purA	-2.3138	0.110586
purB	NA	NA
purC	-1.47776	0.0118396
purD	-1.67776	2.96792e-05
purE	-2.12498	0.0265024
purF	-1.99457	0.0576768
purH	-1.47513	0.00487965
purK	-1.57369	0.00301328
purL	-1.53739	0.017175
purM	-0.772757	0.404126
purN	-0.405833	0.0125001
purR	-0.204448	0.000820795
purT	-0.0156319	0.929019
purU	-0.258983	0.01962
puuA	-0.127785	0.00746731
puuB	-0.117356	0.0247169
puuC	0.0502986	0.678098
puuD	-0.0324886	0.494324
puuE	-0.103916	0.0630325
puuP	-0.0869904	0.0761978
puuR	-0.0967905	0.013731
pykA	0.0213719	0.648338
pykF	-0.154882	0.0771357
pyrB	-0.694044	0.901994
pyrC	-1.76015	0.619806
pyrD	-2.8583	0.523952
pyrF	-2.68605	0.101919
pyrI	0.106967	0.00695849
pyrL	0.0533591	0.340958
qor	0.0651619	0.0113653
qseB	-0.0178963	0.778135
qseC	-0.153764	0.18018
queA	0.0494982	0.0865546
racC	0.35904	0.686707
radA	0.0107305	0.771218
rarA	-0.175049	0.00293748
rarD	0.0992366	0.00359259
rbbA	0.135759	0.000154624
rbfA	-0.331095	0.861667
rbn	0.0556469	0.277685
rbsA	0.259166	2.55855e-18
rbsB	0.244594	3.70542e-15
rbsC	0.211557	7.9935e-16
rbsD	0.148042	6.51531e-10
rbsK	0.178492	3.66169e-10
rbsR	-0.0421395	0.146039
rcsA	-0.0576155	0.542343
rcsD	-0.0162297	0.771188
rcsF	-0.0680001	0.0989101
rdgC	-0.0116453	0.838419
recA	-2.06151	6.56682e-25
recB	-0.452776	0.176549
recC	-0.733706	0.0743445
recD	0.170326	7.01573e-09
recE	0.0153682	0.965967
recF	-0.115037	0.00349859
recG	0.428561	1.25491e-70
recJ	-0.221595	2.71863e-22
recN	-0.0459412	0.26402
recO	-0.312682	1.62816e-07
recQ	0.0950845	0.005644
recR	-0.316801	7.0025e-05
recT	-0.014965	0.886881
recX	-0.0191721	0.869102
relA	-0.490814	3.52183e-15
relE	-0.104739	0.153254
rem	-0.105981	1.36065e-07
renD	0.0613968	0.287758
rep	0.0152565	0.976632
rfaB	0.0391172	0.713575
rfaC	NA	NA
rfaD	0.0386088	0.982048
rfaE	-0.694044	0.901994
rfaF	0.156677	0.874489
rfaG	-0.0145087	0.93347
rfaH	-0.0179361	0.965967
rfaI	0.0317215	0.710595
rfaJ	0.0662189	0.114874
rfaK	0.0878055	8.12001e-07
rfaL	0.0943024	0.000915568
rfaQ	-0.014077	0.835159
rfaS	0.0478669	0.14752
rfaY	0.0245662	0.757316
rfaZ	0.118996	0.0382355
rfbA	-0.037739	0.765041
rfbB	0.0134912	0.881336
rfbC	-0.014472	0.89208
rfbD	-0.0589985	0.569859
rfbX	0.0521269	0.526176
rfe	0.118665	0.0874688
rffA	0.166539	0.517828
rffC	-0.0165069	0.984924
rffD	0.123093	0.000548236
rffE	0.133754	0.0332726
rffG	0.0673845	0.0340935
rffH	0.112905	0.00147724
rffM	0.112735	0.00898913
rffT	0.279063	2.02224e-09
rhaA	0.0766472	0.098166
rhaB	0.097179	0.00111428
rhaD	0.0887813	0.0192131
rhaR	0.0103853	0.88995
rhaS	0.0416701	0.279704
rhaT	0.0541512	0.27865
rhlB	0.0708753	0.013349
rhlE	-0.0900767	0.0856866
rhoL	0.0474705	0.163323
rhsD	-0.120471	0.560797
rhsE	0.129246	0.612195
rhtA	-0.0259808	0.675003
rhtB	0.0520253	0.14656
rhtC	0.0934853	0.00416273
rihA	-0.0628281	0.780939
rihB	-0.0067668	0.947672
rihC	0.0393452	0.134748
rimI	0.0627333	0.302773
rimJ	-0.141929	0.00118233
rimK	-0.109614	0.00271549
rimL	0.144255	0.153166
rimM	NA	NA
rlmB	0.0843294	0.148338
rlpA	-0.00100673	0.989575
rluA	0.0662931	0.0611144
rluB	-0.245164	0.00416273
rluC	-0.242654	0.0118008
rluD	-0.133627	0.0935407
rmf	-0.0129554	0.921553
rmuC	0.10229	0.00259897
rna	0.0383344	0.642071
rnb	-0.338342	3.1898e-08
rnc	-0.578795	0.831249
rnd	-0.249889	1.72716e-06
rng	0.0480607	0.520299
rnhA	0.0888691	0.720826
rnhB	-0.00336524	0.958235
rnk	0.014532	0.803061
rnr	NA	NA
rnt	-0.353658	0.544039
rob	-0.102447	0.00525187
rof	-0.0108394	0.871453
rpe	-0.0574392	0.946458
rph	-0.0233645	0.659871
rpiA	-0.575229	0.603429
rpiB	0.077245	0.138085
rpiR	0.0364691	0.280905
rplD	NA	NA
rplI	-0.113073	0.433373
rplU	-0.694044	0.901994
rpmA	NA	NA
rpmB	-0.131238	0.936817
rpmE	0.251138	0.0193364
rpmF	0.0545209	0.942329
rpmH	0.221466	0.918276
rpmI	1.43818	0.638804
rpmJ	-0.12192	0.931605
rpoD	-1.03391	0.129279
rpoS	-0.744665	2.11316e-284
rpoZ	-0.0274417	0.24778
rpsO	-0.463268	0.490001
rpsT	0.264644	0.0291241
rpsU	-0.578339	0.534902
rraA	0.00402282	0.934833
rrmA	-0.077513	0.250742
rrmJ	NA	NA
rsd	0.0884963	8.98324e-05
rseB	0.00163627	0.983425
rseC	0.001135	0.987176
rsgA	NA	NA
rsmB	0.0481984	0.121849
rsmC	0.0271896	0.73818
rspA	-0.0846371	0.130733
rspB	-0.124224	0.455437
rssA	-0.658712	7.92444e-130
rssB	0.0879554	0.703064
rstA	-0.0093682	0.946458
rstB	-0.0945782	0.420415
rsuA	-0.0435844	0.481598
rsxA	-0.126304	0.317797
rsxB	-0.0777364	0.695805
rsxC	0.0396445	0.865923
rsxD	-0.105531	0.4193
rsxE	-0.244	0.150158
rsxG	-0.156933	0.237284
rtcA	0.0701407	0.228269
rtcB	0.0701553	0.157586
rtcR	0.0784897	0.274785
rtn	0.0311899	0.789312
rumA	-0.111615	0.000132919
rumB	-0.149287	2.7131e-06
rusA	-0.0249881	0.902736
ruvA	-0.973916	8.97117e-36
ruvB	-0.834788	0.00597786
ruvC	-1.10131	3.37109e-07
rzoD	0.0156217	0.89173
rzpD	0.00757899	0.947901
sanA	0.0495327	0.752954
sapA	-0.0902924	0.275741
sapB	-0.172973	0.0104909
sapC	-0.180415	0.000898785
sapD	-0.13655	0.0530185
sapF	-0.0855393	0.384331
sbcB	-0.0948209	7.94959e-05
sbcC	0.0166515	0.736754
sbcD	0.0245173	0.558232
sbmA	0.0182179	0.641044
sbmC	-0.511973	9.10986e-13
sbp	0.082752	0.00360307
sdaA	-0.112231	0.00282484
sdaB	0.0167547	0.584429
sdaC	0.0224817	0.631648
sdhA	NA	NA
sdhB	-0.0452771	0.339763
sdhC	-0.0503231	0.426584
sdhD	0.00402001	0.915346
sdiA	-0.150585	0.026874
secB	0.17647	0.00631721
secD	NA	NA
secF	NA	NA
secG	0.249633	0.34725
selA	0.0882274	0.0052034
selB	0.0382943	0.519347
selD	0.0396505	0.683732
seqA	0.284993	0.479454
serA	-0.291919	0.164363
serB	-0.214749	0.00822568
serC	-0.84655	2.46079e-05
setA	0.0545415	0.0893675
setB	-0.125451	0.0235218
setC	0.091391	0.000247735
sfcA	0.0408077	0.710768
sfmA	-0.0871142	0.658535
sfmC	0.0484465	0.636554
sfmF	-0.0120572	0.871374
sfmH	0.0613047	0.478227
sfsB	0.00678021	0.901901
sgbE	0.121405	1.4181e-06
sgbH	0.111782	1.45265e-07
sgbU	0.125235	0.000137175
sgcB	0.06661	0.104295
sgcC	0.0626256	0.0401179
sgcE	0.0968727	0.00674937
sgcQ	0.105095	0.00109334
sgcR	0.0996951	0.0157055
sgcX	0.0561371	0.253603
sgrR	0.061284	0.0578455
shiA	-0.0795544	0.222885
sieB	-0.148597	0.320226
sixA	-0.0359502	0.487949
slp	0.0829845	0.0235379
slt	0.0566848	0.0392729
slyA	-0.0827994	0.276887
slyB	-0.130102	0.0787507
slyD	0.0843861	0.141451
slyX	0.0570112	0.112229
smf	0.0748451	3.80954e-05
smg	0.0835556	7.03122e-06
smpA	-0.0252023	0.715363
smpB	0.0312946	0.953769
smtA	-0.0604917	0.318914
sodA	0.0698085	0.0541084
sodB	0.0123336	0.927783
sodC	-0.123766	0.09497
sohA	-0.258761	0.621588
sohB	-0.256774	2.4477e-05
solA	-0.1311	0.0650313
soxR	0.0849775	0.000796003
soxS	0.106368	5.10666e-05
speA	0.0360282	0.52089
speB	0.00921951	0.950524
speC	0.0161305	0.774095
speD	-0.259846	2.98308e-17
speE	-0.143843	0.364563
speF	-0.0156766	0.768159
speG	0.0210253	0.934888
sppA	-0.177071	0.00176578
spr	0.210133	0.000820795
sprT	0.0895496	0.357646
spy	-0.182101	0.000538907
sra	-0.289982	0.0208159
srlA	-0.0527573	0.517194
srlB	-0.0373462	0.371103
srlD	-0.0293562	0.583219
srlE	-0.0323375	0.55113
srlR	-0.0664619	0.27865
srmB	-0.348583	0.00214311
sseA	0.00229063	0.981185
sseB	-0.00304661	0.970685
ssnA	-0.00787584	0.881782
sspA	-0.395888	5.98948e-25
sspB	0.0394839	0.0851084
sstT	0.095815	0.0312504
ssuB	-0.103267	0.21589
ssuC	-0.13492	0.0127051
ssuD	-0.124433	0.00248935
ssuE	-0.101401	0.0677816
stfE	0.106189	0.198779
stfQ	-0.237549	0.190369
stfR	-0.00109142	0.992063
sthA	0.101514	2.62037e-09
stpA	-0.0279161	0.630898
sucB	-0.0477485	0.343446
sucC	-0.0356614	0.524924
sucD	-0.0441676	0.486615
sufA	-0.11633	0.277157
sufB	-0.166217	3.64266e-05
sufC	-0.147147	0.0157817
sufD	-0.300874	0.000482637
sufE	-0.149963	0.00198672
sufI	0.117861	0.000154624
sufS	-0.104758	0.0578455
sulA	-0.407671	0.00349425
surA	-0.461674	0.445512
surE	-0.033018	0.629812
syd	-0.00547924	0.944781
tag	0.0955514	0.00157134
talA	-0.0318283	0.43932
talB	-0.0543292	0.00333959
tam	-0.158446	0.250005
tap	-0.0477953	0.442664
tar	-0.113174	0.0903209
tas	0.0154076	0.640901
tatA	0.144477	3.56641e-09
tatB	0.542425	0.363713
tatE	-0.0161182	0.831313
tauA	0.0164019	0.80518
tauB	0.0460462	0.32982
tauC	-0.0101752	0.847984
tauD	-0.0264448	0.499302
tbpA	0.0423504	0.132259
tdcA	-0.0257365	0.786591
tdcB	-0.236764	0.0465199
tdcC	0.150618	0.000280025
tdcF	0.0109178	0.826043
tdcG	0.135584	0.000212997
tdcR	0.0340478	0.457396
tdh	0.037195	0.321519
tdk	-0.147994	0.0671997
tehA	-0.0275424	0.809179
tehB	-0.00956569	0.953769
tesA	-0.00053273	0.994087
tesB	0.013034	0.854771
tfaD	0.137199	0.0236186
tfaE	0.25925	1.4438e-07
tfaS	0.0553409	0.439345
tgt	-8.78171e-05	0.99892
thiC	0.106533	3.01792e-05
thiD	-0.0801944	0.227038
thiE	-0.0112325	0.749426
thiF	-0.0381793	0.190854
thiG	-0.0107247	0.769058
thiH	-0.038767	0.210872
thiI	-0.0947485	0.105118
thiM	-0.0275972	0.881889
thiP	0.0704573	0.0216001
thiQ	0.0680232	0.0284754
thiS	-0.0113788	0.734262
thrA	0.0420983	0.225896
thrB	0.0342547	0.25296
thrC	-0.00431254	0.91112
thrL	0.0591055	0.0633044
tiaE	0.135922	4.32525e-07
tig	-0.0204572	0.694892
tktB	-0.00425649	0.914711
tldD	0.0269441	0.322054
tolA	-0.3594	0.583219
tolB	-0.271456	0.817735
tolC	NA	NA
tolQ	-0.705577	0.033856
tolR	-0.631795	0.42127
tonB	-0.104309	0.146668
topB	-0.00823417	0.950472
torA	-0.13298	7.19368e-08
torC	-0.0479157	0.450243
torD	NA	NA
torI	-0.136279	0.026809
torR	-0.0789651	0.120479
torS	-0.150291	0.00525187
torT	-0.181769	0.245741
torY	-0.109132	0.0130662
torZ	-0.0721976	0.0957028
tpiA	NA	NA
tpr	-0.21897	0.085911
treA	-0.184911	0.00408069
treB	0.0719284	0.0319635
treC	0.113729	0.0555614
treF	0.0281434	0.548311
treR	0.104632	0.00609008
trg	-0.0151669	0.874979
trkA	0.0846757	0.384331
trkD	0.099955	0.0665202
trkG	-0.0453758	0.499265
trkH	0.200053	1.48606e-08
trmA	0.121019	1.93024e-08
trmC	-0.0118993	0.876403
trmE	-0.00881708	0.990066
trmH	0.148488	2.56716e-11
trmU	-0.0672648	0.935322
trpA	-1.35894	1.52976e-07
trpB	-0.84833	0.337287
trpC	-0.337772	9.74108e-08
trpD	-0.413144	0.000458744
trpE	-0.798339	6.18174e-06
trpL	-0.210286	0.000260725
trpR	0.0542465	0.098166
truA	-0.0212409	0.965967
truB	0.0355838	0.462683
truD	-0.029891	0.619806
trxA	-0.0228765	0.797097
trxB	-0.16217	0.0334187
trxC	0.00965313	0.89173
tsgA	0.045847	0.341812
tsr	0.0559084	0.291221
ttdA	0.0753454	0.117041
ttdB	0.0745947	0.0011214
tus	-0.160822	0.251547
tynA	0.015128	0.826707
tyrA	-0.00468583	0.930592
tyrB	0.0839998	0.00489721
tyrP	-0.0698298	0.414303
tyrR	-0.230635	0.000517328
ubiB	-0.551765	0.728692
ubiC	0.0759718	0.0296073
ubiD	-0.111069	0.00948465
ubiF	-0.408688	0.368678
ubiG	-0.0156058	0.827552
ubiH	1.30851	0.507245
ubiX	0.446279	0.89208
ucpA	-0.0170681	0.643287
udk	-0.0534033	0.328976
udp	0.0785344	0.0354309
ugd	-0.219084	0.0931924
ugpA	0.0656131	0.24981
ugpB	0.107504	0.00605465
ugpC	0.106313	0.00157003
ugpE	0.129251	0.000247197
ugpQ	0.154836	2.63399e-06
uhpA	0.0678906	0.00241714
uhpB	0.0681129	0.00545823
uhpC	0.0843899	0.000327398
uhpT	0.0553758	0.173472
uidA	-0.0323912	0.867503
uidB	-0.0621368	0.691892
uidC	-0.18292	0.0312504
ulaA	0.0777208	0.0166865
ulaB	0.0737122	0.0137332
ulaC	0.0317988	0.515577
ulaD	0.0660999	0.00832727
ulaE	0.0956677	0.0731815
ulaF	0.0374741	0.308471
ulaG	0.0918592	0.00891708
ulaR	-0.0435229	0.516257
umuC	-0.271914	6.27288e-10
umuD	-0.233094	5.10457e-09
ung	-0.0247943	0.673392
upp	0.0453294	0.511702
uraA	-0.0406131	0.63594
usg	-0.036654	0.526566
ushA	-0.0168442	0.638294
uspA	0.136912	0.000175322
uspE	-0.0265392	0.750926
uspF	-0.0359858	0.783256
uspG	-0.0541337	0.340477
uup	-0.346253	0.000139248
uvrA	-0.291918	4.13234e-27
uvrB	-0.665466	7.33051e-39
uvrC	-0.160364	0.0367
uvrD	NA	NA
uvrY	-0.130101	0.244092
uxaA	0.0760421	0.000478739
uxaB	-0.0196983	0.838511
uxaC	0.101823	3.61033e-05
uxuA	0.0541685	0.275658
uxuB	-0.694044	0.901994
uxuR	0.0147099	0.831919
vacJ	-0.149763	0.253752
visC	0.0722423	0.581102
vsr	-0.0979034	0.289244
wbbH	-0.015697	0.931605
wbbI	-0.0376505	0.811361
wbbJ	-0.0466964	0.765494
wbbK	-0.119994	0.19819
wcaA	0.0160752	0.777058
wcaB	-0.0587785	0.222885
wcaC	-0.0416778	0.178507
wcaD	-0.0284321	0.559143
wcaE	-0.0578592	0.619806
wcaF	0.0145423	0.805002
wcaI	-0.0358391	0.606412
wcaJ	-0.00884773	0.918132
wcaK	0.0223856	0.833507
wcaL	-0.134044	0.0449332
wcaM	NA	NA
wrbA	-0.243143	2.63399e-06
wza	-0.0632793	0.489112
wzb	-0.0318158	0.701572
wzc	-0.0611873	0.339548
wzxC	-0.0485771	0.21589
wzxE	-0.101545	0.975671
wzzE	0.168064	0.00107298
xapA	0.0435863	0.663279
xapB	-0.0317365	0.417757
xapR	-0.0138536	0.784667
xdhA	0.044377	0.527703
[truncated: 1,681 more rows]

## Sheet: READ_ME
DESeq2 output for all genetic screen conditions reporting the p-value and log2(fold-change) for all genes in the screen; NA indicates an absent strain
