# Supplementary material for: Colibactin leads to a bacteria-specific mutation pattern and self-inflicted DNA damage
Source: Genome Res. 2024 Aug;34(8):1154–64. doi: 10.1101/gr.279517.124 (PMC11444178; doi:10.1101/gr.279517.124)
Supplement: Supplement 5 [file Supplemental_Table_S2.xlsx]

## Sheet: 8h_1_to_1_depletion
pathway	FDR adjusted p-value	set size
eco02040 Flagellar assembly	0.00165627	39
GO:0009260 ribonucleotide biosynthetic process	0.0140839	39
GO:0046390 ribose phosphate biosynthetic process	0.0140839	41
GO:0046377 colanic acid metabolic process	0.050917	21
GO:1901137 carbohydrate derivative biosynthetic process	0.050917	179
GO:0009142 nucleoside triphosphate biosynthetic process	0.050917	10
GO:0009124 nucleoside monophosphate biosynthetic process	0.050917	28
GO:0009991 response to extracellular stimulus	0.050917	67
GO:0009152 purine ribonucleotide biosynthetic process	0.050917	32
GO:0009165 nucleotide biosynthetic process	0.050917	62
GO:1901293 nucleoside phosphate biosynthetic process	0.050917	62
GO:0009156 ribonucleoside monophosphate biosynthetic process	0.0550543	25
GO:0006164 purine nucleotide biosynthetic process	0.0550543	34
GO:0009123 nucleoside monophosphate metabolic process	0.055198	31
GO:0009259 ribonucleotide metabolic process	0.0589009	63
GO:0072522 purine-containing compound biosynthetic process	0.0589009	39
GO:0009432 SOS response	0.0589009	25
GO:0009308 amine metabolic process	0.0589009	47
GO:0044106 cellular amine metabolic process	0.0589009	47
GO:0009309 amine biosynthetic process	0.0604151	16
GO:0042401 cellular biogenic amine biosynthetic process	0.0604151	16
GO:0006576 cellular biogenic amine metabolic process	0.0627812	46
GO:0006928 movement of cell or subcellular component	0.0627812	71
GO:0019693 ribose phosphate metabolic process	0.0627812	67
GO:0009161 ribonucleoside monophosphate metabolic process	0.0841108	27
GO:0015949 nucleobase-containing small molecule interconversion	0.0894487	15
GO:0001539 cilium or flagellum-dependent cell motility	0.0894487	55
GO:0097588 archaeal or bacterial-type flagellum-dependent cell motility	0.0894487	55
GO:0009141 nucleoside triphosphate metabolic process	0.0900619	13
GO:0009199 ribonucleoside triphosphate metabolic process	0.0935695	10
GO:0006541 glutamine metabolic process	0.0935695	12
GO:1901566 organonitrogen compound biosynthetic process	0.098129	353

## Sheet: 8h_1_to_1_enrichment
pathway	FDR adjusted p-value	set size
eco00730 Thiamine metabolism	0.0459866	10
eco00770 Pantothenate and CoA biosynthesis	0.0638155	17
GO:0042364 water-soluble vitamin biosynthetic process	0.00492789	48
GO:0009110 vitamin biosynthetic process	0.00492789	49
GO:0009228 thiamine biosynthetic process	0.00948098	10
GO:0006767 water-soluble vitamin metabolic process	0.00948098	58
GO:0006766 vitamin metabolic process	0.0109621	59
GO:0034309 primary alcohol biosynthetic process	0.0123382	15
GO:0046165 alcohol biosynthetic process	0.0123382	15
GO:0042724 thiamine-containing compound biosynthetic process	0.0245858	11
GO:0032787 monocarboxylic acid metabolic process	0.0403566	182
GO:0044272 sulfur compound biosynthetic process	0.0403566	53
GO:0042398 cellular modified amino acid biosynthetic process	0.0403566	19
GO:0009229 thiamine diphosphate biosynthetic process	0.0403566	10
GO:0042357 thiamine diphosphate metabolic process	0.0403566	10
GO:0005975 carbohydrate metabolic process	0.043876	342
GO:0006790 sulfur compound metabolic process	0.0461715	104
GO:0006772 thiamine metabolic process	0.0555233	13
GO:0042723 thiamine-containing compound metabolic process	0.0555233	13
GO:0034219 carbohydrate transmembrane transport	0.0777993	75
GO:1901617 organic hydroxy compound biosynthetic process	0.0783982	33
GO:0009066 aspartate family amino acid metabolic process	0.0783982	49
GO:0019752 carboxylic acid metabolic process	0.0918941	398

## Sheet: 8h_10_to_1_depletion
pathway	FDR adjusted p-value	set size
GO:0019438 aromatic compound biosynthetic process	0.000614982	483
GO:0006164 purine nucleotide biosynthetic process	0.000844094	34
GO:0009144 purine nucleoside triphosphate metabolic process	0.000844094	11
GO:0006163 purine nucleotide metabolic process	0.000844094	57
GO:0072522 purine-containing compound biosynthetic process	0.000844094	39
GO:0009152 purine ribonucleotide biosynthetic process	0.000844094	32
GO:0009150 purine ribonucleotide metabolic process	0.0020644	53
GO:0009260 ribonucleotide biosynthetic process	0.00284589	37
GO:0009141 nucleoside triphosphate metabolic process	0.00284589	13
GO:0009259 ribonucleotide metabolic process	0.00418192	61
GO:0046390 ribose phosphate biosynthetic process	0.00545758	39
GO:0009142 nucleoside triphosphate biosynthetic process	0.00545758	10
GO:0046459 short-chain fatty acid metabolic process	0.00545758	17
GO:0034654 nucleobase-containing compound biosynthetic process	0.00657041	418
GO:0072521 purine-containing compound metabolic process	0.00657041	75
GO:0009199 ribonucleoside triphosphate metabolic process	0.00730691	10
GO:0009165 nucleotide biosynthetic process	0.0073392	60
GO:1901293 nucleoside phosphate biosynthetic process	0.0073392	60
GO:1901566 organonitrogen compound biosynthetic process	0.00858415	352
GO:0019693 ribose phosphate metabolic process	0.00858415	65
GO:0006753 nucleoside phosphate metabolic process	0.013879	106
GO:0009117 nucleotide metabolic process	0.013879	103
GO:0019541 propionate metabolic process	0.0149063	13
GO:0010467 gene expression	0.016726	499
GO:0006189 'de novo' IMP biosynthetic process	0.0247757	11
GO:0046034 ATP metabolic process	0.0328825	37
GO:0009110 vitamin biosynthetic process	0.047583	49
GO:0016070 RNA metabolic process	0.0489686	442
GO:0006351 transcription, DNA-templated	0.052119	311
GO:0042364 water-soluble vitamin biosynthetic process	0.052119	48
GO:0032774 RNA biosynthetic process	0.0552248	319
GO:0044272 sulfur compound biosynthetic process	0.0555063	53
GO:0006766 vitamin metabolic process	0.0587485	59
GO:0097659 nucleic acid-templated transcription	0.0587485	315
GO:0042398 cellular modified amino acid biosynthetic process	0.0598948	19
GO:0009123 nucleoside monophosphate metabolic process	0.0598948	29
GO:0006631 fatty acid metabolic process	0.0598948	52
GO:0006767 water-soluble vitamin metabolic process	0.065272	58
GO:0046394 carboxylic acid biosynthetic process	0.08629	155
GO:0090407 organophosphate biosynthetic process	0.08629	121
GO:0009161 ribonucleoside monophosphate metabolic process	0.0918271	25
GO:0006188 IMP biosynthetic process	0.097053	14
GO:0016053 organic acid biosynthetic process	0.0971184	156
GO:0009126 purine nucleoside monophosphate metabolic process	0.0971184	18
GO:0009127 purine nucleoside monophosphate biosynthetic process	0.0971184	18
GO:0009167 purine ribonucleoside monophosphate metabolic process	0.0971184	18
GO:0009168 purine ribonucleoside monophosphate biosynthetic process	0.0971184	18

## Sheet: 8h_10_to_1_enrichment
pathway	FDR adjusted p-value	set size
NA	NA	NA

## Sheet: 24h_1_to_1_depletion
pathway	FDR adjusted p-value	set size
eco00190 Oxidative phosphorylation	0.0343331	29
GO:0009165 nucleotide biosynthetic process	0.0205916	61
GO:1901293 nucleoside phosphate biosynthetic process	0.0205916	61
GO:0009142 nucleoside triphosphate biosynthetic process	0.0287856	10
GO:0009260 ribonucleotide biosynthetic process	0.0287856	38
GO:0009199 ribonucleoside triphosphate metabolic process	0.0287856	10
GO:0072522 purine-containing compound biosynthetic process	0.0315393	39
GO:0009259 ribonucleotide metabolic process	0.0315393	62
GO:0019438 aromatic compound biosynthetic process	0.0315393	484
GO:0046390 ribose phosphate biosynthetic process	0.0315393	40
GO:0009144 purine nucleoside triphosphate metabolic process	0.0349568	11
GO:0006164 purine nucleotide biosynthetic process	0.0379821	34
GO:0009150 purine ribonucleotide metabolic process	0.0379821	53
GO:0006163 purine nucleotide metabolic process	0.0379821	57
GO:0072525 pyridine-containing compound biosynthetic process	0.0426994	16
GO:0019693 ribose phosphate metabolic process	0.0426994	66
GO:0009152 purine ribonucleotide biosynthetic process	0.0527349	32
GO:0072521 purine-containing compound metabolic process	0.0541882	76
GO:0090407 organophosphate biosynthetic process	0.0677897	122
GO:0009141 nucleoside triphosphate metabolic process	0.0719401	13
GO:0009110 vitamin biosynthetic process	0.0758661	49
GO:0055086 nucleobase-containing small molecule metabolic process	0.0850047	174
GO:0006753 nucleoside phosphate metabolic process	0.0850047	107
GO:0009628 response to abiotic stimulus	0.0908422	211
GO:0032879 regulation of localization	0.0941525	29
GO:0009117 nucleotide metabolic process	0.0956132	104
GO:0042364 water-soluble vitamin biosynthetic process	0.0980475	48

## Sheet: 24h_1_to_1_enrichment
pathway	FDR adjusted p-value	set size
NA	NA	NA

## Sheet: 24h_10_to_1_depletion
pathway	FDR adjusted p-value	set size
eco02040 Flagellar assembly	4.96199e-05	39
eco01240 Biosynthesis of cofactors	0.00895482	90
eco03440 Homologous recombination	0.0247639	18
eco02026 Biofilm formation - Escherichia coli	0.0247639	42
eco00920 Sulfur metabolism	0.0247639	29
eco00400 Phenylalanine, tyrosine and tryptophan biosynthesis	0.0360606	19
eco00520 Amino sugar and nucleotide sugar metabolism	0.0528933	39
GO:0006164 purine nucleotide biosynthetic process	8.81436e-07	34
GO:0009152 purine ribonucleotide biosynthetic process	8.81436e-07	32
GO:0009260 ribonucleotide biosynthetic process	8.81436e-07	38
GO:0072522 purine-containing compound biosynthetic process	8.81436e-07	39
GO:0046390 ribose phosphate biosynthetic process	1.59463e-06	40
GO:0009165 nucleotide biosynthetic process	1.59463e-06	61
GO:1901293 nucleoside phosphate biosynthetic process	1.59463e-06	61
GO:1901566 organonitrogen compound biosynthetic process	4.37049e-06	354
GO:0072330 monocarboxylic acid biosynthetic process	5.70833e-06	35
GO:0006163 purine nucleotide metabolic process	2.62345e-05	57
GO:0009150 purine ribonucleotide metabolic process	2.78403e-05	53
GO:0006996 organelle organization	3.91737e-05	75
GO:0009259 ribonucleotide metabolic process	4.26569e-05	62
GO:0009124 nucleoside monophosphate biosynthetic process	7.54342e-05	27
GO:0006189 'de novo' IMP biosynthetic process	8.28665e-05	11
GO:0019693 ribose phosphate metabolic process	0.000105098	66
GO:0044272 sulfur compound biosynthetic process	0.000117732	54
GO:0046040 IMP metabolic process	0.000332853	15
GO:0009123 nucleoside monophosphate metabolic process	0.000346274	30
GO:0009117 nucleotide metabolic process	0.000346274	104
GO:0009156 ribonucleoside monophosphate biosynthetic process	0.000356478	24
GO:0006753 nucleoside phosphate metabolic process	0.000378154	107
GO:0072521 purine-containing compound metabolic process	0.000378154	76
GO:0009314 response to radiation	0.000562577	79
GO:0046377 colanic acid metabolic process	0.000744304	21
GO:0009161 ribonucleoside monophosphate metabolic process	0.000979006	26
GO:0006188 IMP biosynthetic process	0.00107184	14
GO:0090407 organophosphate biosynthetic process	0.00120007	122
GO:0042364 water-soluble vitamin biosynthetic process	0.0013363	48
GO:0070925 organelle assembly	0.0013363	36
GO:0140694 non-membrane-bounded organelle assembly	0.0013363	36
GO:0009126 purine nucleoside monophosphate metabolic process	0.00143086	18
GO:0009127 purine nucleoside monophosphate biosynthetic process	0.00143086	18
GO:0009167 purine ribonucleoside monophosphate metabolic process	0.00143086	18
GO:0009168 purine ribonucleoside monophosphate biosynthetic process	0.00143086	18
GO:0009110 vitamin biosynthetic process	0.00173973	49
GO:0009142 nucleoside triphosphate biosynthetic process	0.00222481	10
GO:0009242 colanic acid biosynthetic process	0.00227017	18
GO:0006928 movement of cell or subcellular component	0.00255851	71
GO:0044283 small molecule biosynthetic process	0.00348421	233
GO:0051129 negative regulation of cellular component organization	0.00349482	14
GO:0046394 carboxylic acid biosynthetic process	0.00350925	156
GO:0016053 organic acid biosynthetic process	0.00414027	157
GO:0009073 aromatic amino acid family biosynthetic process	0.00474586	24
GO:0001539 cilium or flagellum-dependent cell motility	0.00486567	55
GO:0097588 archaeal or bacterial-type flagellum-dependent cell motility	0.00486567	55
GO:0044781 bacterial-type flagellum organization	0.00486567	23
GO:0040011 locomotion	0.00728108	76
GO:0006633 fatty acid biosynthetic process	0.00728108	14
GO:0071840 cellular component organization or biogenesis	0.00741137	370
GO:0022618 ribonucleoprotein complex assembly	0.00812624	15
GO:0071826 ribonucleoprotein complex subunit organization	0.00812624	15
GO:0048870 cell motility	0.00812624	63
GO:0051674 localization of cell	0.00812624	63
GO:0071973 bacterial-type flagellum-dependent cell motility	0.00837129	53
GO:0006790 sulfur compound metabolic process	0.00884618	105
GO:0006767 water-soluble vitamin metabolic process	0.0107265	58
GO:0009199 ribonucleoside triphosphate metabolic process	0.0107265	10
GO:0016043 cellular component organization	0.0112964	324
GO:0071978 bacterial-type flagellum-dependent swarming motility	0.0124868	14
GO:0009141 nucleoside triphosphate metabolic process	0.0129179	13
GO:0006766 vitamin metabolic process	0.0136754	59
GO:0043436 oxoacid metabolic process	0.0187055	420
GO:0009144 purine nucleoside triphosphate metabolic process	0.0187055	11
GO:0009628 response to abiotic stimulus	0.0201466	211
GO:0055086 nucleobase-containing small molecule metabolic process	0.0202802	174
GO:0043604 amide biosynthetic process	0.0202802	92
GO:0009309 amine biosynthetic process	0.0202802	16
GO:0042401 cellular biogenic amine biosynthetic process	0.0202802	16
GO:0009432 SOS response	0.0248839	25
GO:0006796 phosphate-containing compound metabolic process	0.0257451	361
GO:0019438 aromatic compound biosynthetic process	0.0291201	485
GO:0019637 organophosphate metabolic process	0.0298249	208
GO:0042274 ribosomal small subunit biogenesis	0.0318649	10
GO:0042255 ribosome assembly	0.0367403	18
GO:0034622 cellular protein-containing complex assembly	0.0404712	38
GO:0006082 organic acid metabolic process	0.04195	432
GO:0009072 aromatic amino acid family metabolic process	0.04195	28
GO:0043603 cellular amide metabolic process	0.04195	129
GO:0051276 chromosome organization	0.0431548	27
GO:0044780 bacterial-type flagellum assembly	0.0455521	17
GO:0006793 phosphorus metabolic process	0.0493356	381
GO:0009636 response to toxic substance	0.0579953	70
GO:0072525 pyridine-containing compound biosynthetic process	0.0588034	16
GO:0015846 polyamine transport	0.0604616	18
GO:0006468 protein phosphorylation	0.0662363	50
GO:0019752 carboxylic acid metabolic process	0.0732678	398
GO:0030030 cell projection organization	0.0732678	73
GO:0043650 dicarboxylic acid biosynthetic process	0.0836692	25
GO:0046112 nucleobase biosynthetic process	0.0866886	14
GO:0009070 serine family amino acid biosynthetic process	0.088303	18
GO:0015949 nucleobase-containing small molecule interconversion	0.0938507	15

## Sheet: 24h_10_to_1_enrichment
pathway	FDR adjusted p-value	set size
eco00053 Ascorbate and aldarate metabolism	0.0180637	18
eco03070 Bacterial secretion system	0.0180637	13
GO:0019634 organic phosphonate metabolic process	0.0152223	10
GO:0009246 enterobacterial common antigen biosynthetic process	0.0283514	11
GO:0046378 enterobacterial common antigen metabolic process	0.0283514	11
GO:0009067 aspartate family amino acid biosynthetic process	0.0410433	27
GO:0044262 cellular carbohydrate metabolic process	0.0570122	211
GO:0008643 carbohydrate transport	0.0570122	112
GO:0006073 cellular glucan metabolic process	0.0570122	22
GO:0009244 lipopolysaccharide core region biosynthetic process	0.0705659	17
GO:0046401 lipopolysaccharide core region metabolic process	0.0705659	17
GO:0005975 carbohydrate metabolic process	0.0705659	341
GO:0044042 glucan metabolic process	0.0705659	23
GO:0009081 branched-chain amino acid metabolic process	0.0705659	18
GO:0009082 branched-chain amino acid biosynthetic process	0.0705659	18
GO:0044273 sulfur compound catabolic process	0.0719078	12
GO:0006573 valine metabolic process	0.0876335	11
GO:0009099 valine biosynthetic process	0.0876335	11

## Sheet: 48h_1_to_1_depletion
pathway	FDR adjusted p-value	set size
eco02040 Flagellar assembly	2.18666e-05	39
eco03440 Homologous recombination	0.00143625	17
eco00920 Sulfur metabolism	0.0126658	29
eco00400 Phenylalanine, tyrosine and tryptophan biosynthesis	0.0167851	19
eco02030 Bacterial chemotaxis	0.0725319	20
GO:0006164 purine nucleotide biosynthetic process	0.000130291	34
GO:0072522 purine-containing compound biosynthetic process	0.000130291	39
GO:0006163 purine nucleotide metabolic process	0.000192255	57
GO:0009152 purine ribonucleotide biosynthetic process	0.000449043	32
GO:0009150 purine ribonucleotide metabolic process	0.000543729	53
GO:0009260 ribonucleotide biosynthetic process	0.000576455	37
GO:0009259 ribonucleotide metabolic process	0.000875373	61
GO:0046390 ribose phosphate biosynthetic process	0.000875373	39
GO:0009242 colanic acid biosynthetic process	0.000875373	18
GO:0046377 colanic acid metabolic process	0.000875373	21
GO:0006189 'de novo' IMP biosynthetic process	0.0010222	11
GO:0009165 nucleotide biosynthetic process	0.00120246	60
GO:1901293 nucleoside phosphate biosynthetic process	0.00120246	60
GO:0019693 ribose phosphate metabolic process	0.00128174	65
GO:0072521 purine-containing compound metabolic process	0.00128361	76
GO:0001539 cilium or flagellum-dependent cell motility	0.00132333	55
GO:0097588 archaeal or bacterial-type flagellum-dependent cell motility	0.00132333	55
GO:0006928 movement of cell or subcellular component	0.00132996	71
GO:1901566 organonitrogen compound biosynthetic process	0.00139587	353
GO:0046040 IMP metabolic process	0.00315043	15
GO:0071973 bacterial-type flagellum-dependent cell motility	0.00320238	53
GO:0009126 purine nucleoside monophosphate metabolic process	0.00320238	18
GO:0009127 purine nucleoside monophosphate biosynthetic process	0.00320238	18
GO:0009167 purine ribonucleoside monophosphate metabolic process	0.00320238	18
GO:0009168 purine ribonucleoside monophosphate biosynthetic process	0.00320238	18
GO:0071978 bacterial-type flagellum-dependent swarming motility	0.00384847	14
GO:0009142 nucleoside triphosphate biosynthetic process	0.00391226	10
GO:0009314 response to radiation	0.00420633	79
GO:0040011 locomotion	0.00424218	76
GO:0009124 nucleoside monophosphate biosynthetic process	0.00427813	26
GO:0071840 cellular component organization or biogenesis	0.00479009	370
GO:0009156 ribonucleoside monophosphate biosynthetic process	0.00577134	23
GO:0009117 nucleotide metabolic process	0.00577134	103
GO:0009628 response to abiotic stimulus	0.00607171	211
GO:0006188 IMP biosynthetic process	0.00703462	14
GO:0048870 cell motility	0.00703462	63
GO:0051674 localization of cell	0.00703462	63
GO:0006753 nucleoside phosphate metabolic process	0.00716679	106
GO:0006996 organelle organization	0.00750828	75
GO:0006869 lipid transport	0.00925588	28
GO:0010876 lipid localization	0.00925588	28
GO:0009123 nucleoside monophosphate metabolic process	0.0094689	29
GO:0009161 ribonucleoside monophosphate metabolic process	0.00965528	25
GO:0022618 ribonucleoprotein complex assembly	0.00965528	15
GO:0071826 ribonucleoprotein complex subunit organization	0.00965528	15
GO:0009199 ribonucleoside triphosphate metabolic process	0.0135832	10
GO:0016043 cellular component organization	0.0186747	324
GO:0009141 nucleoside triphosphate metabolic process	0.0208064	13
GO:0009309 amine biosynthetic process	0.0208064	16
GO:0042401 cellular biogenic amine biosynthetic process	0.0208064	16
GO:0019438 aromatic compound biosynthetic process	0.0218154	482
GO:0009308 amine metabolic process	0.0218154	47
GO:0044106 cellular amine metabolic process	0.0218154	47
GO:0009073 aromatic amino acid family biosynthetic process	0.0218154	24
GO:0009144 purine nucleoside triphosphate metabolic process	0.0218154	11
GO:0090407 organophosphate biosynthetic process	0.0218154	121
GO:0015949 nucleobase-containing small molecule interconversion	0.0222839	15
GO:0015846 polyamine transport	0.0290601	18
GO:0006576 cellular biogenic amine metabolic process	0.0309242	46
GO:1901137 carbohydrate derivative biosynthetic process	0.0325426	176
GO:0009310 amine catabolic process	0.0348131	28
GO:0042402 cellular biogenic amine catabolic process	0.0348131	28
GO:0042255 ribosome assembly	0.039386	18
GO:0009070 serine family amino acid biosynthetic process	0.0398956	18
GO:0044272 sulfur compound biosynthetic process	0.0401066	54
GO:0009072 aromatic amino acid family metabolic process	0.0402234	28
GO:0009447 putrescine catabolic process	0.0402234	10
GO:0009432 SOS response	0.0418473	25
GO:0006935 chemotaxis	0.0418473	26
GO:0042330 taxis	0.0418473	26
GO:0044781 bacterial-type flagellum organization	0.0439518	23
GO:0051129 negative regulation of cellular component organization	0.0515372	14
GO:0009991 response to extracellular stimulus	0.0516786	67
GO:0055086 nucleobase-containing small molecule metabolic process	0.0610846	173
GO:0072337 modified amino acid transport	0.0631523	21
GO:0071103 DNA conformation change	0.0631523	19
GO:0051276 chromosome organization	0.0645565	27
GO:0015721 bile acid and bile salt transport	0.0660876	13
GO:0046034 ATP metabolic process	0.0660876	37
GO:0046148 pigment biosynthetic process	0.0661233	12
GO:0015847 putrescine transport	0.0667095	15
GO:0006364 rRNA processing	0.0667095	36
GO:0044283 small molecule biosynthetic process	0.0802159	234
GO:0071897 DNA biosynthetic process	0.0943092	12
GO:0042440 pigment metabolic process	0.0983964	13

## Sheet: 48h_1_to_1_enrichment
pathway	FDR adjusted p-value	set size
eco00053 Ascorbate and aldarate metabolism	0.0248964	18
GO:0019634 organic phosphonate metabolic process	0.000228324	10
GO:0006073 cellular glucan metabolic process	0.0174902	22
GO:0005975 carbohydrate metabolic process	0.0174902	342
GO:0019520 aldonic acid metabolic process	0.0174902	22
GO:0019321 pentose metabolic process	0.0174902	21
GO:0044042 glucan metabolic process	0.0174902	23
GO:0046176 aldonic acid catabolic process	0.0316642	20
GO:0009246 enterobacterial common antigen biosynthetic process	0.035599	11
GO:0046378 enterobacterial common antigen metabolic process	0.035599	11
GO:0008643 carbohydrate transport	0.0396836	112
GO:0016052 carbohydrate catabolic process	0.0396836	122
GO:0009250 glucan biosynthetic process	0.0486071	16
GO:0051273 beta-glucan metabolic process	0.0486071	11
GO:0009081 branched-chain amino acid metabolic process	0.0486071	18
GO:0009082 branched-chain amino acid biosynthetic process	0.0486071	18
GO:0019323 pentose catabolic process	0.0618084	14
GO:0006573 valine metabolic process	0.0618084	11
GO:0009099 valine biosynthetic process	0.0618084	11
GO:0034219 carbohydrate transmembrane transport	0.0618084	75
GO:0016054 organic acid catabolic process	0.0747152	177
GO:0051274 beta-glucan biosynthetic process	0.0763442	10

[truncated: 3 more sheets: 48h_10_to_1_depletion, 48h_10_to_1_enrichment, READ_MEPathway enrichment for a]
