# Supplementary material for: Colibactin leads to a bacteria-specific mutation pattern and self-inflicted DNA damage
Source: Genome Res. 2024 Aug;34(8):1154–64. doi: 10.1101/gr.279517.124 (PMC11444178; doi:10.1101/gr.279517.124)
Supplement: Supplement 6 [file Supplemental_Table_S3.xlsx]

## Sheet: Sheet1
strain	log2(fold-change)	adjusted p-value
acrB	-0.201885	2.64227e-08
acrE	0.349236	2.16396e-15
adhE	-0.0767335	0.80459
afuB	-0.955834	0.140556
afuC	0.086971	0.676773
alkA	0.0764826	0.0269935
apaH	-0.0878449	0.200884
argF	-0.0814278	0.740014
asmA	0.247474	0.0152863
aspC	-0.688244	0.067813
astD	0.113971	0.326042
atpA	-1.64718	5.84915e-35
atpB	-1.68523	1.89028e-28
atpC	-1.25591	4.89902e-13
atpE	-1.47712	5.84442e-42
atpF	-1.60763	1.27653e-28
atpG	-1.18141	9.86266e-22
carA	-0.823194	0.0244566
carB	-2.02943	3.02317e-26
cfa	-0.0311791	0.555459
chpS	0.69108	1.53337e-16
clpP	0.112731	0.326042
clpX	0.306789	0.0106565
cpxA	-0.401285	6.81706e-06
crr	0.377122	2.67768e-05
cspC	-0.176052	5.06317e-05
cyoC	0.157161	0.000840292
cysB	-1.18538	2.37214e-17
cysC	0.352071	4.49253e-05
cysD	0.393318	0.00435463
cysG	0.0243695	0.782285
cysH	0.373004	0.000629329
cysI	0.2728	0.0338691
cysJ	0.3422	0.0788483
cysK	0.123397	0.0747113
cysN	0.386655	0.000229617
dksA	-1.58134	1.00033e-14
dnaB	0.670241	8.23394e-14
dsbB	-0.748553	7.40156e-06
epd	0.593988	3.91745e-29
flu	-0.0545051	0.356674
frmB	0.21165	0.0643411
frsA	0.00164905	0.984602
fur	-0.352675	0.0447149
galR	0.0892427	0.0272438
gcl	0.189437	0.000234302
gloA	-0.0425126	0.442752
gss	0.204381	1.19609e-06
guaD	0.482502	2.3994e-05
hcaD	0.409486	6.92738e-08
hfq	-0.527803	0.03974
hofC	0.321549	7.98249e-14
hscA	-0.404902	0.0629418
hybB	0.198197	1.02037e-10
intF	0.104788	0.447085
kdpD	-0.184994	5.03084e-05
kil	0.400068	8.36646e-05
ksgA	0.2055	3.8884e-12
ldcA	-1.79524	1.94241e-31
lipA	0.0803198	0.44448
lon	0.64132	1.00014e-16
lpp	-0.0790812	0.537993
metJ	0.319667	0.0680371
metL	-1.23067	8.18006e-08
metN	0.153105	2.43954e-08
mmuM	0.118176	0.522153
mmuP	0.127775	0.490375
moaB	0.103761	8.5956e-05
moaE	0.0101097	0.900385
mrcB	-0.267041	0.0566003
nadA	-0.375314	0.0580974
nadB	-0.309646	0.0522818
nadC	-0.293193	0.119503
nlpI	-0.0329598	0.247618
ompA	-1.04717	3.21545e-08
pal	-0.248534	0.0429354
pdxA	-0.224509	0.239779
pdxB	NA	NA
pdxJ	-0.281853	0.0814981
pfkA	-0.214112	0.0473767
pgi	-0.570543	0.00278137
phoB	0.120072	2.36213e-05
phoP	-0.0625182	0.218059
phoU	0.289129	1.00033e-14
ppc	-0.435476	7.66087e-07
prc	-0.978909	1.00033e-14
prfC	-0.27943	3.60812e-05
proQ	-0.274676	2.62246e-10
prpB	0.231957	0.113572
pstA	0.139569	1.56663e-06
ptsG	-0.289019	0.000405424
purA	-1.35671	0.00022083
purC	-1.39858	0.000820572
purD	-1.41013	3.02431e-07
purE	-1.34868	1.85012e-12
purF	-2.74528	1.71278e-17
purH	-1.44599	3.67167e-14
purK	-1.58981	1.6991e-16
purL	-1.08482	3.42367e-09
purM	-1.35672	2.77699e-07
purN	0.203353	0.106616
pyrF	-1.4393	5.86922e-14
recA	-1.98345	4.63676e-56
recB	-0.30021	1.74067e-06
recC	-0.272901	0.000225495
recG	0.172298	5.29489e-05
relA	-1.1863	1.98383e-19
rfaH	-0.0469496	0.37168
rnhA	0.191962	6.69116e-14
rplI	-0.0265968	0.379782
rpmF	-0.0926135	0.35357
rpmI	-0.151433	0.0305337
rpoD	NA	NA
rpoS	-0.253006	7.72329e-06
rspB	0.0166085	0.837986
rssA	-0.487579	8.47829e-25
ruvA	-0.984925	7.34017e-59
ruvB	-0.972302	2.89323e-57
ruvC	-1.23755	1.10848e-75
sbmC	-0.361344	1.29669e-36
serA	-0.241646	0.0623213
serC	-0.578475	0.0305337
smpB	0.103977	1.65356e-05
speE	-0.558286	1.86733e-06
srmB	0.252615	0.0545205
sspA	-0.403699	4.37001e-10
sulA	0.0125619	0.837986
tatB	0.22271	0.0429354
tauB	0.137171	0.0152863
tktB	0.0716643	0.0160234
tolA	-0.394556	0.000432949
tolQ	0.0121084	0.909184
tolR	-0.343261	0.000188826
trmE	0.0358416	0.6723
trpA	-0.07544	0.776162
trpB	-0.292746	0.197665
trpC	0.545422	4.15882e-21
trpD	1.03948	1.41527e-13
trpE	-0.0291154	0.851323
truD	0.184651	4.79579e-10
trxA	0.354487	2.5218e-06
ubiH	0.166217	0.000121968
ulaB	0.280251	9.99279e-18
uup	-0.00345236	0.946011
uvrB	-0.785723	1.14631e-55
yadR	0.389479	3.89574e-09
yaeF	0.317348	1.42163e-16
yaeP	0.297647	0.00435463
yagA	-0.171194	0.490375
yagB	-0.180425	0.8713
yagE	-0.470814	0.244431
yagF	-0.404072	0.307856
yagG	-0.297496	0.370957
yagH	0.0300857	0.909184
yagI	-0.0583408	0.837986
yagJ	0.00458115	0.974534
yagK	0.0158615	0.925591
yagL	0.1049	0.490375
yahM	0.386325	0.0236112
ybaK	0.0580769	0.0872083
ybaW	-0.249624	0.35357
ybcN	-0.0476553	0.837986
ybeD	-0.0451028	0.419287
ybhG	-0.214899	0.524827
ybiI	0.0707985	0.000238139
ybjJ	0.0501312	0.122167
yccK	-0.41729	0.000600853
yccX	0.0801849	0.163232
ycdR	0.0339343	0.869505
yceD	-0.166294	0.000663573
ycfL	0.232449	0.35357
ycfM	-0.427156	2.3392e-06
ycgM	0.0405237	0.253979
ychF	-0.262106	0.0278789
yciB	-0.110097	0.0788483
yciM	-0.259029	0.00034283
ydcQ	0.227083	0.000587524
ydeM	0.837466	6.81245e-05
ydjH	0.776165	0.0305337
yebK	0.135976	0.0427286
yehB	0.20417	7.40156e-06
yehR	0.0561071	0.226232
yeiP	0.267246	0.000225599
yfaL	0.0426026	0.121027
yfeT	0.407056	0.000114255
yfeW	0.355094	0.416863
yfjD	0.316257	4.65849e-06
ygcI	NA	NA
ygdK	0.324324	0.000938882
ygdL	0.362248	9.08174e-08
ygeD	0.278771	4.43268e-06
yhbC	-0.486891	1.18023e-05
yieM	0.370957	2.58498e-09
ykgN	-0.0394431	0.87333
ynfB	0.0398244	0.62201
ynfO	0.117064	0.034944
yoaE	0.0733414	0.00554593
ypfJ	0.131044	0.00438697
yrbG	0.281683	6.83877e-13
ytfM	0.397405	1.74462e-09

## Sheet: READ_MEDESeq2 output for target
DESeq2 output for targeted validation screen reporting the p-value and log2(fold-change) for each gene (deletion strain); NA indicates a missing strain (the barcode was not identified in the sequencing data)
