# Supplementary material for: Colibactin leads to a bacteria-specific mutation pattern and self-inflicted DNA damage
Source: Genome Res. 2024 Aug;34(8):1154–64. doi: 10.1101/gr.279517.124 (PMC11444178; doi:10.1101/gr.279517.124)
Supplement: Supplement 7 [file Supplemental_Table_S4.xlsx]

## Sheet: mutations_excluding_e14
condition	sample	position	breseq_mutation	frequency	breseq_annotation	breseq_gene	synonomous	upstream_sequence	downstream_sequence	sbs_mutation_context	mutation_type	shared_between_pks+_pks-
pks+	pksPos11	357551	T>G	0.255	E7D (GAA→GAC)	lacA	nonsynonymous	TATTCT	TCGGTC	tattctTtcggtc	sbs	FALSE
pks+	pksPos11	592122	A>C	0.268	E356A (GAA→GCA)	cusC	nonsynonymous	TCGCCG	AATTCG	tcgccgAaattcg	sbs	FALSE
pks+	pksPos11	1059765	A>T	0.271	N92Y (AAT→TAT)	yccE	nonsynonymous	CGTACT	ATGATA	cgtactAatgata	sbs	FALSE
pks+	pksPos11	1352520	G>T	0.326	H309N (CAT→AAT)	puuP	nonsynonymous	TGGCAT	TGAAGC	tggcatGtgaagc	sbs	FALSE
pks+	pksPos11	1659760	G>T	0.248	A63A (GCG→GCT)	clcB	synonymous	ACTGGC	GCGGGT	actggcGgcgggt	sbs	FALSE
pks+	pksPos11	1705533	A>C	0.227	E150A (GAA→GCA)	rsxE	nonsynonymous	TACGCG	AATTAT	tacgcgAaattat	sbs	FALSE
pks+	pksPos11	2359220	A>C	0.253	intergenic (‑121/‑187)	ais / arnB		GCCTCA	AATTTT	gcctcaAaatttt	sbs	FALSE
pks+	pksPos11	2848042	A>T	0.224	K116* (AAA→TAA)	fhlA	nonsynonymous	TACCCA	AATTTG	tacccaAaatttg	sbs	FALSE
pks+	pksPos11	2899745	T>A	0.17	F226I (TTT→ATT)	ygcG	nonsynonymous	AAAATT	TTTCCA	aaaattTtttcca	sbs	FALSE
pks+	pksPos11	4212306	T>A	0.144	K37I (AAA→ATA)	arpA	nonsynonymous	GAAAAT	TATCCT	gaaaatTtatcct	sbs	FALSE
pks+	pksPos11	4245315	T>A	0.249	K360N (AAA→AAT)	plsB	nonsynonymous	ATAAAG	TTATTG	ataaagTttattg	sbs	FALSE
pks+	pksPos12	405258	T>A	0.205	K73I (AAA→ATA)	rdgC	nonsynonymous	AGGATT	TTTCTT	aggattTtttctt	sbs	FALSE
pks+	pksPos12	1369305	T>A	0.211	I29N (ATC→AAC)	ycjQ	nonsynonymous	TGAAGA	CCGCGT	tgaagaTccgcgt	sbs	FALSE
pks+	pksPos12	1559158	A>T	0.251	I278N (ATT→AAT)	dosP	nonsynonymous	CGACAA	TGATTT	cgacaaAtgattt	sbs	FALSE
pks+	pksPos12	1625441	A>T	0.132	pseudogene (1102/1284 nt)	ydfJ		TGCAGA	AATACC	tgcagaAaatacc	sbs	FALSE
pks+	pksPos12	1653856	A>T	0.301	K511* (AAA→TAA)	ynfE	nonsynonymous	TCGGCA	AATATG	tcggcaAaatatg	sbs	FALSE
pks+	pksPos12	1798904	T>A	0.177	pseudogene (1130/1476 nt)	arpB		CTAAAA	TAATGG	ctaaaaTtaatgg	sbs	FALSE
pks+	pksPos12	1805767	T>A	0.322	F193I (TTT→ATT)	ydjN	nonsynonymous	GTAATT	TTGCCG	gtaattTttgccg	sbs	FALSE
pks+	pksPos12	1965876	T>A	0.165	K358I (AAA→ATA)	tar	nonsynonymous	GCAATT	TCTTCG	gcaattTtcttcg	sbs	FALSE
pks+	pksPos12	2870027	G>A	0.227	G30S (GGC→AGC)	iap	nonsynonymous	AAACCT	GCGATT	aaacctGgcgatt	sbs	FALSE
pks+	pksPos12	2877814	A>T	0.228	intergenic (‑317/+98)	casA / ygcB		ACCGGG	AATTAA	accgggAaattaa	sbs	FALSE
pks+	pksPos12	3460386	A>T	0.232	intergenic (‑36/+133)	bfd / chiA		AAATGA	AATAGT	aaatgaAaatagt	sbs	FALSE
pks+	pksPos12	3530093	A>T	0.261	intergenic (‑150/‑78)	ompR / greB		TCGGCG	AACATT	tcggcgAaacatt	sbs	FALSE
pks+	pksPos12	3724260	T>C	0.333	intergenic (‑135/‑231)	xylA / xylF		GCAAAA	AAAATG	gcaaaaTaaaatg	sbs	FALSE
pks+	pksPos12	3902529	A>T	0.145	L91M (TTG→ATG)	pstA	nonsynonymous	CCCACA	AATTAA	cccacaAaattaa	sbs	FALSE
pks+	pksPos12	4441948	T>G	0.138	N358K (AAT→AAG)	ytfR	nonsynonymous	GGAAAA	ATCATC	ggaaaaTatcatc	sbs	FALSE
pks+	pksPos12	4527131	C>T	0.127	G94D (GGC→GAC)	nanS	nonsynonymous	GCCTGG	CAACGG	gcctggCcaacgg	sbs	FALSE
pks+	pksPos3	384206	A>T	0.172	intergenic (+104/+3)	tauD / hemB		GAAACA	AATTAA	gaaacaAaattaa	sbs	FALSE
pks+	pksPos3	1091101	A>C	0.224	pseudogene (141/342 nt)	ymdE		CAAAGA	AATCTC	caaagaAaatctc	sbs	FALSE
pks+	pksPos3	1255796	A>T	0.266	F155Y (TTT→TAT)	dauA	nonsynonymous	CCGAGA	AATCTT	ccgagaAaatctt	sbs	FALSE
pks+	pksPos3	1511558	T>G	0.199	intergenic (‑107/‑88)	yncL / ydcX		ATGATT	TTTCTC	atgattTtttctc	sbs	FALSE
pks+	pksPos3	1641230	T>G	0.229	intergenic (+236/+201)	flxA / intK		CCAACT	CCGCTT	ccaactTccgctt	sbs	FALSE
pks+	pksPos3	1811712	A>T	0.204	I349N (ATT→AAT)	chbF	nonsynonymous	GCCGGA	TATTAT	gccggaAtattat	sbs	FALSE
pks+	pksPos3	1928841	G>A	0.212	R7R (CGC→CGT)	edd	synonymous	TGTTAC	CGTAAC	tgttacGcgtaac	sbs	FALSE
pks+	pksPos3	2058694	A>T	0.274	L4I (TTA→ATA)	cobS	nonsynonymous	AAAATA	TTTACT	aaaataAtttact	sbs	FALSE
pks+	pksPos3	2760974	A>G	0.201	intergenic (+260/‑95)	rnlB / yfjP		TTGAAA	AATCTT	ttgaaaAaatctt	sbs	FALSE
pks+	pksPos3	3575112	Δ1 bp	0.167	intergenic (+126/‑111)	yhhY / yhhZ					small_deletion	FALSE
pks+	pksPos3	3757525	T>C	0.177	L661L (CTT→CTC)	rhsA	synonymous	TGTACT	GACCGG	tgtactTgaccgg	sbs	FALSE
pks+	pksPos3	3867374	T>A	0.27	D154V (GAT→GTT)	dgoK	nonsynonymous	CGAAAA	CGTTGA	cgaaaaTcgttga	sbs	FALSE
pks+	pksPos3	3872811	C>A	0.262	K223N (AAG→AAT)	gyrB	nonsynonymous	GAACGC	TTGATG	gaacgcCttgatg	sbs	FALSE
pks+	pksPos3	4165077	A>T	0.19	intergenic (‑123/‑239)	coaA / thrU		AAGAAA	AATCTC	aagaaaAaatctc	sbs	FALSE
pks+	pksPos3	4400384	A>T	0.244	K5N (AAA→AAT)	yjfJ	nonsynonymous	TTTAAA	AGTTTA	tttaaaAagttta	sbs	FALSE
pks+	pksPos4	503947	T>A	0.278	L92M (TTG→ATG)	ybaQ	nonsynonymous	GAAGAA	TGGGAC	gaagaaTtgggac	sbs	FALSE
pks+	pksPos4	844989	T>C	0.263	I189V (ATT→GTT)	rhtA	nonsynonymous	CGAAAA	TAACGC	cgaaaaTtaacgc	sbs	FALSE
pks+	pksPos4	940942	T>A	0.147	L24F (TTA→TTT)	ycaC	nonsynonymous	GGAAAG	AAACCA	ggaaagTaaacca	sbs	FALSE
pks+	pksPos4	1165352	T>G	0.177	N160T (AAC→ACC)	ldtC	nonsynonymous	CGGATG	TTGCCG	cggatgTttgccg	sbs	FALSE
pks+	pksPos4	1389968	T>A	0.245	K71I (AAA→ATA)	ynaI	nonsynonymous	ATAAAT	TGAGTT	ataaatTtgagtt	sbs	FALSE
pks+	pksPos4	1527816	T>G	0.141	K98T (AAA→ACA)	yddH	nonsynonymous	TTAAAT	TATCTT	ttaaatTtatctt	sbs	FALSE
pks+	pksPos4	1805767	T>A	0.108	F193I (TTT→ATT)	ydjN	nonsynonymous	GTAATT	TTGCCG	gtaattTttgccg	sbs	FALSE
pks+	pksPos4	1829805	A>T	0.228	I12F (ATT→TTT)	ynjA	nonsynonymous	CCTTTA	TTTTAC	cctttaAttttac	sbs	FALSE
pks+	pksPos4	1845799	A>C	0.237	N228T (AAT→ACT)	ansA	nonsynonymous	TGCGCA	TTTTCT	tgcgcaAttttct	sbs	FALSE
pks+	pksPos4	1985925	C>A	0.117	W125L (TGG→TTG)	pgsA	nonsynonymous	CCAATC	AGGAGA	ccaatcCaggaga	sbs	FALSE
pks+	pksPos4	2033505	T>G	0.176	Y183D (TAT→GAT)	yedY	nonsynonymous	ACAATT	ATGCAC	acaattTatgcac	sbs	FALSE
pks+	pksPos4	2033834	G>T	0.166	Q292H (CAG→CAT)	yedY	nonsynonymous	GTCACA	GCTACC	gtcacaGgctacc	sbs	FALSE
pks+	pksPos4	2452117	A>T	0.323	L174L (CTT→CTA)	fadJ	synonymous	CGCCCG	AGTTGT	cgcccgAagttgt	sbs	FALSE
pks+	pksPos4	2582317	C>A	0.257	P455Q (CCA→CAA)	acrD	nonsynonymous	TTGTAC	AATGGC	ttgtacCaatggc	sbs	FALSE
pks+	pksPos4	2582548	A>C	0.262	K532T (AAA→ACA)	acrD	nonsynonymous	TGGCGA	AATTCT	tggcgaAaattct	sbs	FALSE
pks+	pksPos4	2725683	G>A	0.199	A617V (GCG→GTG)	clpB	nonsynonymous	GCCAGC	CCTTAC	gccagcGccttac	sbs	FALSE
pks+	pksPos4	3724260	T>C	0.1	intergenic (‑135/‑231)	xylA / xylF		GCAAAA	AAAATG	gcaaaaTaaaatg	sbs	FALSE
pks+	pksPos4	3792583	T>A	0.265	I30I (ATA→ATT)	waaU	synonymous	ATTATT	ATTTTA	attattTatttta	sbs	FALSE
pks+	pksPos4	4428152	T>A	0.178	F210Y (TTT→TAT)	ytfI	nonsynonymous	ATAATT	TGCCAT	ataattTtgccat	sbs	FALSE
pks+	pksPos4	4465616	T>C	0.184	I121I (ATT→ATC)	yjgL	synonymous	AGAAAT	TCACTT	agaaatTtcactt	sbs	FALSE
pks+	pksPos4	4603883	A>C	0.363	K196Q (AAA→CAA)	yjjV	nonsynonymous	ATCGCA	AATTAC	atcgcaAaattac	sbs	FALSE
pks+	pksPos5	355222	G>A	0.24	R8H (CGC→CAC)	cynS	nonsynonymous	TTAACC	CAATAT	ttaaccGcaatat	sbs	FALSE
pks+	pksPos5	725098	C>T	0.124	V20V (GTC→GTT)	rhsC	synonymous	CATTGT	CAGGGT	cattgtCcagggt	sbs	FALSE
pks+	pksPos5	725116	A>G	0.164	V26V (GTA→GTG)	rhsC	synonymous	CGGGGT	CGCATC	cggggtAcgcatc	sbs	FALSE
pks+	pksPos5	727315	T>C	0.202	H759H (CAT→CAC)	rhsC	synonymous	GCATCA	CCGCAG	gcatcaTccgcag	sbs	FALSE
pks+	pksPos5	727325	A>G	0.187	N763D (AAT→GAT) ‡	rhsC	nonsynonymous	CAGACG	ATGAAC	cagacgAatgaac	sbs	FALSE
pks+	pksPos5	727327	T>A	0.187	N763K (AAT→AAA) ‡	rhsC	nonsynonymous	GACGAA	GAACTG	gacgaaTgaactg	sbs	FALSE
pks+	pksPos5	727329	A>C	0.188	E764A (GAA→GCA)	rhsC	nonsynonymous	CGAATG	ACTGCT	cgaatgAactgct	sbs	FALSE
pks+	pksPos5	727369	A>G	0.107	A777A (GCA→GCG)	rhsC	synonymous	CAACGC	CAGGGA	caacgcAcaggga	sbs	FALSE
pks+	pksPos5	727375	A>G	0.108	G779G (GGA→GGG)	rhsC	synonymous	ACAGGG	CTGGCG	acagggActggcg	sbs	FALSE
pks+	pksPos5	773072	T>C	0.198	intergenic (+9/‑124)	tolA / tolB		GCGATG	TGACTG	gcgatgTtgactg	sbs	FALSE
pks+	pksPos5	1309017	A>T	0.26	F155L (TTT→TTA)	yciE	nonsynonymous	AATTAA	AATTTC	aattaaAaatttc	sbs	FALSE
pks+	pksPos5	1319494	G>A	0.302	K164K (AAG→AAA)	yciQ	synonymous	TTATAA	ACCCGT	ttataaGacccgt	sbs	FALSE
pks+	pksPos5	1375394	T>A	0.299	pseudogene (317/957 nt)	ycjV		AAAAAA	CGCCAA	aaaaaaTcgccaa	sbs	FALSE
pks+	pksPos5	1636684	A>C	0.246	intergenic (+360/+62)	cspF / quuQ		TTGAAA	AATTTT	ttgaaaAaatttt	sbs	FALSE
pks+	pksPos5	1773065	A>C	0.256	F165C (TTT→TGT)	ydiP	nonsynonymous	TTTTTA	AATTTT	tttttaAaatttt	sbs	FALSE
pks+	pksPos5	1916395	T>A	0.228	L6L (CTT→CTA)	yebW	synonymous	GGTACT	TTTGTT	ggtactTtttgtt	sbs	FALSE
pks+	pksPos5	1932965	C>A	0.221	L354M (CTG→ATG)	pykA	nonsynonymous	CACCGT	TGGACG	caccgtCtggacg	sbs	FALSE
pks+	pksPos5	2054607	A>C	0.265	L270V (TTA→GTA)	nac	nonsynonymous	CGGGTA	ATTTAA	cgggtaAatttaa	sbs	FALSE
pks+	pksPos5	2225534	T>G	0.263	F71C (TTT→TGT)	cdd	nonsynonymous	CGAATT	TAATGT	cgaattTtaatgt	sbs	FALSE
pks+	pksPos5	2614301	A>T	0.184	intergenic (‑70/‑255)	upp / purM		GCGGCA	TATTCT	gcggcaAtattct	sbs	FALSE
pks+	pksPos5	2731059	IS4 (+) +13 bp	0.294	intergenic (+54/‑33)	pheL / pheA					small_insertion	FALSE
pks+	pksPos5	3326521	T>C	0.3	K97R (AAA→AGA)	rplU	nonsynonymous	GTAATT	TCACAT	gtaattTtcacat	sbs	FALSE
pks+	pksPos5	3551499	T>A	0.275	intergenic (‑61/‑128)	rtcB / rtcR		GAAAAT	AAATAA	gaaaatTaaataa	sbs	FALSE
pks+	pksPos5	3760532	G>A	0.261	R279H (CGT→CAT)	yibA	nonsynonymous	TGAAGC	TTCATA	tgaagcGttcata	sbs	FALSE
pks+	pksPos5	3795181	A>T	0.308	F60Y (TTT→TAT)	waaJ	nonsynonymous	ATATAA	AATCAA	atataaAaatcaa	sbs	FALSE
pks+	pksPos6	1063730	A>T	0.137	intergenic (+20/+237)	ymdF / rutG		TGACGA	TGCATT	tgacgaAtgcatt	sbs	FALSE
pks+	pksPos6	1527816	T>G	0.12	K98T (AAA→ACA)	yddH	nonsynonymous	TTAAAT	TATCTT	ttaaatTtatctt	sbs	FALSE
pks+	pksPos6	1999033	A>T	0.261	N84Y (AAC→TAC)	fliS	nonsynonymous	ACCCAA	ACTTGA	acccaaAacttga	sbs	FALSE
pks+	pksPos6	2030785	T>A	0.243	E283D (GAA→GAT)	yedV	nonsynonymous	AATATT	TCCAGC	aatattTtccagc	sbs	FALSE
pks+	pksPos6	2444060	A>T	0.193	S4T (TCA→ACA)	yfcP	nonsynonymous	TCATTG	TTTATT	tcattgAtttatt	sbs	FALSE
pks+	pksPos6	3048247	A>C	0.188	V186G (GTA→GGA)	ygfB	nonsynonymous	TTTTGT	CTTCTG	ttttgtActtctg	sbs	FALSE
pks+	pksPos6	4465616	T>C	0.158	I121I (ATT→ATC)	yjgL	synonymous	AGAAAT	TCACTT	agaaatTtcactt	sbs	FALSE
pks+	pksPos6	4589723	T>A	0.249	N95I (AAC→ATC)	yjjA	nonsynonymous	TTGATG	TTTCGG	ttgatgTtttcgg	sbs	FALSE
pks+	pksPos7	11780	A>T	0.23	S3T (TCC→ACC)	yaaI	nonsynonymous	AAACGG	TTTCAT	aaacggAtttcat	sbs	FALSE
pks+	pksPos7	426113	A>C	0.319	K18T (AAA→ACA)	yajD	nonsynonymous	GCGAAA	AGCATT	gcgaaaAagcatt	sbs	FALSE
pks+	pksPos7	453222	A>T	0.245	N114I (AAC→ATC)	clpX	nonsynonymous	AAAGTA	CATTCT	aaagtaAcattct	sbs	FALSE
pks+	pksPos7	1091382	IS1 (–) +9 bp	0.214	coding (84‑92/987 nt)	ycdU					small_insertion	FALSE
pks+	pksPos7	1282801	T>A	0.292	intergenic (‑17/+193)	tyrV / tyrT		CAAATT	TGAGGT	caaattTtgaggt	sbs	FALSE
pks+	pksPos7	1461709	A>T	0.202	pseudogene (2061/2513 nt)	ydbA		GGCGGA	TATTTC	ggcggaAtatttc	sbs	FALSE
pks+	pksPos7	1501745	A>T	0.175	V236V (GTA→GTT)	ydcP	synonymous	TGGTGT	CGCTCC	tggtgtAcgctcc	sbs	FALSE
pks+	pksPos7	1643482	A>C	0.241	intergenic (+184/‑157)	ydfC / dicF		GTCGTT	AATTTT	gtcgttAaatttt	sbs	FALSE
pks+	pksPos7	1725177	G>T	0.253	G612C (GGT→TGT)	lhr	nonsynonymous	GCTCCG	GTCGTT	gctccgGgtcgtt	sbs	FALSE
pks+	pksPos7	1729236	A>T	0.323	K182I (AAA→ATA)	mepH	nonsynonymous	TGGTGA	AATTCG	tggtgaAaattcg	sbs	FALSE
pks+	pksPos7	1739981	T>A	0.155	K135I (AAA→ATA)	ydhQ	nonsynonymous	ATGATT	TTTCCG	atgattTtttccg	sbs	FALSE
pks+	pksPos7	2473330	G>A	0.199	G217D (GGT→GAT)	dsdA	nonsynonymous	ATTATG	TGTTGC	attatgGtgttgc	sbs	FALSE
pks+	pksPos7	4367980	T>C	0.234	E261G (GAG→GGG)	ampC	nonsynonymous	GTTTTC	CATTGA	gttttcTcattga	sbs	FALSE
pks+	pksPos8	208931	A>C	0.154	E38D (GAA→GAC)	tilS	nonsynonymous	GACGGA	AATCCG	gacggaAaatccg	sbs	FALSE
pks+	pksPos8	1193467	G>A	0.309	A76V (GCA→GTA)	ymfE	nonsynonymous	AAATAT	CAAAAA	aaatatGcaaaaa	sbs	FALSE
pks+	pksPos8	1278613	C>A	0.338	I1098I (ATC→ATA)	narG	synonymous	GGGTAT	CACTCC	gggtatCcactcc	sbs	FALSE
pks+	pksPos8	1296297	C>A	0.103	P287T (CCG→ACG)	oppA	nonsynonymous	GAGATC	CGGACG	gagatcCcggacg	sbs	FALSE
pks+	pksPos8	1818263	A>G	0.168	K164K (AAA→AAG)	cho	synonymous	ACAAAA	CTTTGT	acaaaaActttgt	sbs	FALSE
pks+	pksPos8	2355664	G>A	0.227	A9A (GCC→GCT)	rhmR	synonymous	TGTCAG	GCGGGA	tgtcagGgcggga	sbs	FALSE
pks+	pksPos8	2359321	A>T	0.233	intergenic (‑222/‑86)	ais / arnB		TCCTTA	AATTTC	tccttaAaatttc	sbs	FALSE
pks+	pksPos8	2935433	A>T	0.251	L165* (TTA→TAA)	gcvA	nonsynonymous	GGCAAT	AATATT	ggcaatAaatatt	sbs	FALSE
pks+	pksPos8	3377945	T>A	0.199	intergenic (‑318/‑117)	mdh / argR		CGAAAT	TGATAA	cgaaatTtgataa	sbs	FALSE
pks+	pksPos8	4593188	IS5 (–) +4 bp	0.128	intergenic (‑513/‑103)	yjjP / yjjQ					small_insertion	FALSE
pks+	pksPos9	222268	G>A	0.278	noncoding (23/2904 nt)	rrlH		GTACAC	GTGGAT	gtacacGgtggat	sbs	FALSE
pks+	pksPos9	345777	T>A	0.243	S19T (TCT→ACT)	prpC	nonsynonymous	AAAAAA	CTGTGG	aaaaaaTctgtgg	sbs	FALSE
pks+	pksPos9	656879	T>A	0.19	intergenic (‑45/+214)	ybeF / lipB		AAAAAA	TACAAT	aaaaaaTtacaat	sbs	FALSE
pks+	pksPos9	666608	C>A	0.25	A152S (GCT→TCT)	holA	nonsynonymous	GCGCAG	AACCCA	gcgcagCaaccca	sbs	FALSE
pks+	pksPos9	726166	A>C	0.249	L376F (TTA→TTC)	rhsC	nonsynonymous	AGGCTT	AGTTAC	aggcttAagttac	sbs	FALSE
pks+	pksPos9	840051	C>T	0.357	A296T (GCG→ACG)	ybiO	nonsynonymous	CCAGCG	ACCTAT	ccagcgCacctat	sbs	FALSE
pks+	pksPos9	1295231	A>T	0.254	intergenic (+530/‑208)	ychE / oppA		TCGCGA	AGAATA	tcgcgaAagaata	sbs	FALSE
pks+	pksPos9	1964931	A>T	0.223	F104Y (TTT→TAT)	tap	nonsynonymous	GCCATA	AACTTT	gccataAaacttt	sbs	FALSE
pks+	pksPos9	2117349	T>A	0.217	K218I (AAA→ATA)	cpsB	nonsynonymous	TATTTT	TCAGTT	tattttTtcagtt	sbs	FALSE
pks+	pksPos9	2337437	IS2 (–) +5 bp	0.285	coding (208‑212/3753 nt)	yfaL					small_insertion	FALSE
pks+	pksPos9	2595532	A>T	0.213	N119I (AAT→ATT)	hyfB	nonsynonymous	TTATGA	TATTTT	ttatgaAtatttt	sbs	FALSE
pks+	pksPos9	2666963	T>A	0.215	F87I (TTC→ATC)	yphA	nonsynonymous	TTTATT	TCTACA	tttattTtctaca	sbs	FALSE
pks+	pksPos9	3753562	T>A	0.276	K350* (AAA→TAA)	selA	nonsynonymous	GTAATT	TTCACT	gtaattTttcact	sbs	FALSE
pks+	pksPos10	439649	T>C	0.118	N108S (AAC→AGC)	panE	nonsynonymous	TGAATG	TTTGCA	tgaatgTtttgca	sbs	FALSE
pks+	pksPos10	447838	G>A	0.116	S388S (TCC→TCT)	ampG	synonymous	GGCGAC	GAGAAT	ggcgacGgagaat	sbs	FALSE
pks+	pksPos10	1142145	A>T	0.156	noncoding (101/169 nt)	psrD		GAACGA	AATAAA	gaacgaAaataaa	sbs	TRUE
pks+	pksPos10	1296297	C>A	0.152	P287T (CCG→ACG)	oppA	nonsynonymous	GAGATC	CGGACG	gagatcCcggacg	sbs	FALSE
pks+	pksPos10	1542196	T>C	0.151	F180S (TTT→TCT)	fdnG	nonsynonymous	AGAAAT	TGCCCG	agaaatTtgcccg	sbs	TRUE
pks+	pksPos10	1609330	A>C	0.145	L90F (TTA→TTC)	yneJ	nonsynonymous	AGGTTT	TTTTCT	aggtttAttttct	sbs	TRUE
pks+	pksPos10	1644507	T>A	0.126	pseudogene (173/765 nt)	ydfE		ATAAAT	TATTGT	ataaatTtattgt	sbs	TRUE
pks+	pksPos10	2937398	A>G	0.27	K235E (AAA→GAA)	csdA	nonsynonymous	TATGGT	AATCAG	tatggtAaatcag	sbs	FALSE
pks+	pksPos10	3420206	G>A	0.116	intergenic (‑64/+111)	rrlD / alaU		ACTTTC	TTGTTC	actttcGttgttc	sbs	FALSE
pks+	pksPos1	161068	A>C	0.147	intergenic (+47/‑149)	hrpB / mrcB		GAGGGC	TCAGCG	gagggcAtcagcg	sbs	TRUE
pks+	pksPos1	576215	G>C	0.131	intergenic (‑314/‑75)	ylcI / nohD		AGAAAG	AAACGA	agaaagGaaacga	sbs	FALSE
pks+	pksPos1	776779	Δ124 bp	0.217	nan	lysZ					medium_deletion	FALSE
pks+	pksPos1	896129	A>C	0.255	intergenic (‑98/+193)	artJ / artM		ATGATT	AATAAT	atgattAaataat	sbs	FALSE
pks+	pksPos1	1060644	C>T	0.245	H385Y (CAT→TAT)	yccE	nonsynonymous	GGCAAT	ATTATG	ggcaatCattatg	sbs	FALSE
pks+	pksPos1	1632928	T>C	0.233	intergenic (‑4/+359)	cspI / rzpQ		CATAAT	ATTACC	cataatTattacc	sbs	FALSE
pks+	pksPos1	1887111	T>G	0.245	S128R (AGC→CGC)	yoaA	nonsynonymous	CATCGC	TAAGAT	catcgcTtaagat	sbs	FALSE
pks+	pksPos1	2170713	C>A	0.134	intergenic (‑30/+278)	gatY / fbaB		CGATTT	AAAATA	cgatttCaaaata	sbs	TRUE
pks+	pksPos1	2170724	G>T	0.156	intergenic (‑41/+267)	gatY / fbaB		TATAAT	AAATTA	tataatGaaatta	sbs	TRUE
pks+	pksPos1	2420334	A>T	0.275	intergenic (‑67/+154)	hisJ / argT		GCCATA	AATTGA	gccataAaattga	sbs	FALSE
pks+	pksPos1	2463906	C>A	0.116	Q433K (CAA→AAA)	gtrS	nonsynonymous	ATAATT	AAAGAA	ataattCaaagaa	sbs	TRUE
pks+	pksPos1	2463915	C>A	0.113	Q436K (CAA→AAA)	gtrS	nonsynonymous	AGAAAT	AAGACA	agaaatCaagaca	sbs	TRUE
pks+	pksPos1	2538290	C>T	0.295	A227T (GCG→ACG)	murR	nonsynonymous	AATGCG	CAGCCG	aatgcgCcagccg	sbs	FALSE
pks+	pksPos1	2609761	A>T	0.212	E103D (GAA→GAT)	bepA	nonsynonymous	CGACGA	ATTAAC	cgacgaAattaac	sbs	FALSE
pks+	pksPos1	2629922	T>G	0.277	K265T (AAA→ACA)	der	nonsynonymous	GTGATT	TGCCGC	gtgattTtgccgc	sbs	FALSE
pks+	pksPos1	3011573	G>T	0.209	A719S (GCA→TCA)	ygfK	nonsynonymous	ATGCCC	CATGGC	atgcccGcatggc	sbs	FALSE
pks+	pksPos1	3044057	A>T	0.251	intergenic (‑31/+417)	gcvT / ubiI		CTGACA	CTTTTT	ctgacaActtttt	sbs	FALSE
pks+	pksPos1	3059717	Δ1 bp	0.29	coding (816/897 nt)	ygfI					small_deletion	FALSE
pks+	pksPos1	4234541	G>T	0.152	Q155K (CAA→AAA)	malF	nonsynonymous	GTTTTT	CTCGCC	gtttttGctcgcc	sbs	FALSE
pks+	pksPos1	4532409	A>C	0.226	N186H (AAT→CAT)	fimE	nonsynonymous	GAAAGA	ATAATC	gaaagaAataatc	sbs	FALSE
pks+	pksPos2	838661	T>G	0.113	W292G (TGG→GGG)	rlmF	nonsynonymous	ATTGCC	GGACCT	attgccTggacct	sbs	FALSE
pks+	pksPos2	1045283	T>G	0.15	intergenic (‑83/‑6)	gfcA / insA		TGAGGT	CTCCAG	tgaggtTctccag	sbs	FALSE
pks+	pksPos2	1160024	G>C	0.141	M158I (ATG→ATC)	nagZ	nonsynonymous	CGGAAT	AAAACG	cggaatGaaaacg	sbs	FALSE
pks+	pksPos2	1339767	G>C	0.249	T411T (ACC→ACG)	gmr	synonymous	CAAGTT	GTATCC	caagttGgtatcc	sbs	FALSE
pks+	pksPos2	1362888	C>A	0.227	H185N (CAC→AAC)	pspA	nonsynonymous	GAAAGC	ACAGCT	gaaagcCacagct	sbs	FALSE
pks+	pksPos2	1630709	C>G	0.145	intergenic (‑85/‑304)	nohQ / ynfO		TCTTTT	AGGGGG	tcttttCaggggg	sbs	FALSE
pks+	pksPos2	1767306	A>T	0.216	I180F (ATC→TTC)	ydiN	nonsynonymous	GTACTG	TCACGC	gtactgAtcacgc	sbs	FALSE
pks+	pksPos2	1947356	T>G	0.3	F133C (TTT→TGT)	cmoA	nonsynonymous	TGAATT	TACCCT	tgaattTtaccct	sbs	FALSE
pks+	pksPos2	2170707	C>A	0.136	intergenic (‑24/+284)	gatY / fbaB		TGTTTT	GATTTC	tgttttCgatttc	sbs	FALSE
pks+	pksPos2	2170713	C>A	0.206	intergenic (‑30/+278)	gatY / fbaB		CGATTT	AAAATA	cgatttCaaaata	sbs	TRUE
pks+	pksPos2	2170724	G>T	0.254	intergenic (‑41/+267)	gatY / fbaB		TATAAT	AAATTA	tataatGaaatta	sbs	TRUE
pks+	pksPos2	2170775	G>T	0.11	intergenic (‑92/+216)	gatY / fbaB		CAATAT	AAAATT	caatatGaaaatt	sbs	FALSE
pks+	pksPos2	2463910	G>T	0.106	R434I (AGA→ATA)	gtrS	nonsynonymous	TTCAAA	AAATCA	ttcaaaGaaatca	sbs	TRUE
pks+	pksPos2	2463915	C>A	0.103	Q436K (CAA→AAA)	gtrS	nonsynonymous	AGAAAT	AAGACA	agaaatCaagaca	sbs	TRUE
pks+	pksPos2	2569457	T>A	0.224	*760Y (TAA→TAT)	maeB	nonsynonymous	AAAAAA	TACAGC	aaaaaaTtacagc	sbs	FALSE
pks+	pksPos2	2719191	G>T	0.142	intergenic (‑86/+237)	kgtP / rrfG		TTTGTT	CATATC	tttgttGcatatc	sbs	FALSE
pks+	pksPos2	2719536	G>T	0.372	noncoding (12/120 nt)	rrfG		CGCTAC	GCCGCC	cgctacGgccgcc	sbs	FALSE
pks+	pksPos2	3657233	T>C	0.243	intergenic (+346/+17)	mdtF / gadW		CCAATA	TCAAAT	ccaataTtcaaat	sbs	FALSE
pks+	pksPos2	3822340	A>C	0.119	Q12H (CAA→CAC)	xanP	nonsynonymous	TGCGCA	CCGGTT	tgcgcaAccggtt	sbs	FALSE
pks+	pksPos2	3827184	T>G	0.221	E238D (GAA→GAC)	yicI	nonsynonymous	AAAGTA	TCGAGA	aaagtaTtcgaga	sbs	FALSE
pks+	pksPos2	4207788	A>T	0.249	E251V (GAA→GTA)	aceA	nonsynonymous	ACAGCG	ATTTAT	acagcgAatttat	sbs	FALSE
pks+	pksPos2	4280750	T>A	0.167	F116Y (TTT→TAT)	nrfD	nonsynonymous	AAATCT	TGAACA	aaatctTtgaaca	sbs	FALSE
pks+	pksPos2	4495531	C>T	0.177	S143L (TCA→TTA)	yjhC	nonsynonymous	TATTAT	ATGTCA	tattatCatgtca	sbs	FALSE
pks+	pksPos2	4550545	A>T	0.24	intergenic (‑48/‑202)	yjiH / kptA		CCAGGA	AATTCC	ccaggaAaattcc	sbs	FALSE
pks-	pksNeg1	161068	A>C	0.28	intergenic (+47/‑149)	hrpB / mrcB		GAGGGC	TCAGCG	gagggcAtcagcg	sbs	TRUE
pks-	pksNeg1	1913770	G>A	0.24	L668L (CTG→CTA)	yebT	synonymous	GGATCT	ATTACC	ggatctGattacc	sbs	FALSE
pks-	pksNeg1	2170713	C>A	0.162	intergenic (‑30/+278)	gatY / fbaB		CGATTT	AAAATA	cgatttCaaaata	sbs	TRUE
pks-	pksNeg1	2170724	G>T	0.161	intergenic (‑41/+267)	gatY / fbaB		TATAAT	AAATTA	tataatGaaatta	sbs	TRUE
pks-	pksNeg1	2463910	G>T	0.129	R434I (AGA→ATA)	gtrS	nonsynonymous	TTCAAA	AAATCA	ttcaaaGaaatca	sbs	TRUE
pks-	pksNeg2	1282287	T>G	0.103	intergenic (+305/+235)	narI / rttR		CCCCGC	TGGGCA	ccccgcTtgggca	sbs	FALSE
pks-	pksNeg2	1802451	Δ8 bp	0.269	coding (399‑406/861 nt)	yniA					small_deletion	FALSE
pks-	pksNeg2	2170713	C>A	0.149	intergenic (‑30/+278)	gatY / fbaB		CGATTT	AAAATA	cgatttCaaaata	sbs	TRUE
pks-	pksNeg2	2170724	G>T	0.185	intergenic (‑41/+267)	gatY / fbaB		TATAAT	AAATTA	tataatGaaatta	sbs	TRUE
pks-	pksNeg2	2463906	C>A	0.138	Q433K (CAA→AAA)	gtrS	nonsynonymous	ATAATT	AAAGAA	ataattCaaagaa	sbs	TRUE
pks-	pksNeg2	2463910	G>T	0.16	R434I (AGA→ATA)	gtrS	nonsynonymous	TTCAAA	AAATCA	ttcaaaGaaatca	sbs	TRUE
pks-	pksNeg2	2463915	C>A	0.159	Q436K (CAA→AAA)	gtrS	nonsynonymous	AGAAAT	AAGACA	agaaatCaagaca	sbs	TRUE
pks-	pksNeg2	2958464	C>G	0.11	Q17H (CAG→CAC)	thyA	nonsynonymous	GTTTTT	TGTGTG	gtttttCtgtgtg	sbs	FALSE
pks-	pksNeg2	3496619	G>T	0.255	V32L (GTG→TTG)	frlD	nonsynonymous	GTGGCG	TGTACT	gtggcgGtgtact	sbs	FALSE
pks-	pksNeg3	3250645	A>G	0.265	V242A (GTG→GCG)	yhaO	nonsynonymous	GAGATC	CCATCG	gagatcAccatcg	sbs	FALSE
pks-	pksNeg5	3285459	IS5 (–) +4 bp	0.117	coding (760‑763/1092 nt)	yraK					small_insertion	FALSE
pks-	pksNeg7	1273968	C>T	0.237	P186S (CCG→TCG)	narK	nonsynonymous	GTTGCT	CGCTGG	gttgctCcgctgg	sbs	FALSE
pks-	pksNeg10	142422	C>T	0.155	S285S (AGC→AGT)	yadE	synonymous	TATGAG	GTTTCT	tatgagCgtttct	sbs	FALSE
pks-	pksNeg10	3795003	C>A	0.282	L119F (TTG→TTT)	waaJ	nonsynonymous	TAAACC	AATAAT	taaaccCaataat	sbs	FALSE
pks-	pksNeg11	307773	IS5 (–) +4 bp	0.275	intergenic (‑726/‑47)	ecpR / ykgL					small_insertion	FALSE
pks-	pksNeg11	3263314	G>A	0.15	intergenic (+353/+261)	yhaC / rnpB		CCAAAA	TAAAAA	ccaaaaGtaaaaa	sbs	FALSE
pks-	pksNeg11	4029211	A>G	0.282	noncoding (321/1542 nt)	rrsA		ACTGGA	CTGAGA	actggaActgaga	sbs	FALSE
pks-	pksNeg12	1142145	A>T	0.161	noncoding (101/169 nt)	psrD		GAACGA	AATAAA	gaacgaAaataaa	sbs	TRUE
pks-	pksNeg12	1542196	T>C	0.125	F180S (TTT→TCT)	fdnG	nonsynonymous	AGAAAT	TGCCCG	agaaatTtgcccg	sbs	TRUE
pks-	pksNeg12	1609330	A>C	0.113	L90F (TTA→TTC)	yneJ	nonsynonymous	AGGTTT	TTTTCT	aggtttAttttct	sbs	TRUE
pks-	pksNeg12	1644507	T>A	0.121	pseudogene (173/765 nt)	ydfE		ATAAAT	TATTGT	ataaatTtattgt	sbs	TRUE
pks-	pksNeg12	3311270	G>A	0.231	R32R (CGC→CGT)	rimP	synonymous	GGATGT	CGACCG	ggatgtGcgaccg	sbs	FALSE

## Sheet: e14_excision
condition	sample	position	frequency
pks+	pksPos11	1191676	1
pks+	pksPos12	1191676	0.752
pks+	pksPos3	1191676	0.412
pks+	pksPos4	1191676	0.916
pks+	pksPos5	1191676	0.35
pks+	pksPos6	1191676	0.369
pks+	pksPos7	1191676	0.549
pks+	pksPos8	1191676	0.851
pks+	pksPos9	1191676	0.383
pks+	pksPos10	1191676	1
pks+	pksPos1	1191676	0.643
pks+	pksPos2	1191676	0.294
pks-	pksNeg12	1191676	0.117

## Sheet: READ_ME
Colibactin-induced mutations (mostly breseq output) including classification of each type of mutation (sbs, small deletion, etc.) and the sequence context used for motif detection
