# Supplementary material for: Colibactin leads to a bacteria-specific mutation pattern and self-inflicted DNA damage
Source: Genome Res. 2024 Aug;34(8):1154–64. doi: 10.1101/gr.279517.124 (PMC11444178; doi:10.1101/gr.279517.124)
Supplement: Supplement 8 [file Supplemental_Table_S5.xlsx]

## Sheet: Sheet1
species	strain	phylogroup	phylogroup_sub	accesion	genome_size	n_contigs	n_pks_hits	is_pks_pos	colibactin_skew
Escherichia coli	2012C-4502	G	G	GCA_003018255.1	5.06638	2	0	0	0.80645
Escherichia coli KTE75	KTE75	G	G	GCA_000351685.1	5.79783	37	0	0	0.82544
Escherichia coli	N11-1317	G	G	GCA_001902655.1	5.63225	3	0	0	0.81596
Escherichia coli	ECLC+05	G	G	GCA_002317955.1	5.11828	258	0	0	0.81279
Escherichia coli	6294	G	G	GCA_002193155.1	5.04476	145	0	0	0.80926
Escherichia coli	chicken fecal	G	G	GCA_001268185.1	4.83611	54	0	0	0.801
Escherichia coli	K56-78	G	G	GCA_002810135.1	4.71525	55	0	0	0.79516
Escherichia coli	MOD1-EC6758	G	G	GCA_002521265.1	4.96474	142	0	0	0.80102
Escherichia coli	MOD1-EC5768	G	G	GCA_002518255.1	5.22526	321	0	0	0.80741
Escherichia coli	CFSAN026806	G	G	GCA_001262905.1	5.1601	109	0	0	0.80235
Escherichia coli	2014C-3338	G	G	GCA_003018095.1	4.95862	2	0	0	0.79704
Escherichia coli	MOD1-EC6146	G	G	GCA_002535335.1	4.89516	118	0	0	0.80696
Escherichia coli	MOD1-EC6828	G	G	GCA_002468335.1	5.16821	179	0	0	0.81796
Escherichia coli	104	G	G	GCA_003095635.1	4.97131	1	0	0	0.80282
Escherichia coli	ARS-CC9622	G	G	GCA_002142355.1	5.03017	175	0	0	0.80941
Escherichia coli	LLP5	G	G	GCA_003014805.1	4.94621	133	0	0	0.80098
Escherichia coli APEC O2-211	APEC O2-211	G	G	GCA_001021635.2	5.11251	4	0	0	0.81591
Escherichia coli	blood-10-0682	G	G	GCA_000781595.1	5.29654	175	0	0	0.80636
Escherichia coli	MOD1-EC6295	G	G	GCA_002511595.1	4.95681	139	0	0	0.81442
Escherichia coli	AM5019	G	G	GCA_003014795.1	4.98703	315	0	0	0.81013
Escherichia coli	LLP3	G	G	GCA_003014835.1	5.01576	147	0	0	0.813
Escherichia coli	LLP4	G	G	GCA_003013535.1	5.03066	122	0	0	0.80736
Escherichia coli	MOD1-EC5011	G	G	GCA_002475625.1	5.23909	159	0	0	0.81641
Escherichia coli	ARS-CC9635	G	G	GCA_002142335.1	5.11009	617	0	0	0.80967
Escherichia coli	UCI103	G	G	GCA_002152185.1	5.62527	16	0	0	0.81724
Escherichia coli	20Ec-P-124	G	G	GCA_002357915.1	5.3797	7	0	0	0.81553
Escherichia coli	32_Esco_HA-NL	G	G	GCA_002442155.1	5.1978	138	0	0	0.81638
Escherichia coli HVH 79 (4-2512823)	HVH 79 (4-2512823)	G	G	GCA_000457125.1	5.16846	13	0	0	0.81671
Escherichia coli H299	H299	G	G	GCA_000176695.2	5.31784	113	0	0	0.81827
Escherichia coli	F2_88	G	G	GCA_900196505.1	5.19814	90	0	0	0.80506
Escherichia coli	F2_85	G	G	GCA_900196345.1	5.19664	75	0	0	0.80602
Escherichia coli	MOD1-EC6074	G	G	GCA_002541385.1	5.2617	295	0	0	0.81148
Escherichia coli	ARS-CC9640	G	G	GCA_002142435.1	5.26558	284	0	0	0.81008
Escherichia coli	2009C-3133	G	G	GCA_001420955.1	5.51434	4	0	0	0.80884
Escherichia coli	WH398	G	G	GCA_002930345.1	5.17232	274	0	0	0.80909
Escherichia coli	MOD1-EC5996	G	G	GCA_002543505.1	5.19733	264	0	0	0.80995
Escherichia coli	GN02004	G	G	GCA_001519195.1	5.16323	219	0	0	0.8107
Escherichia coli	ARS-CC9591	G	G	GCA_002142365.1	5.15037	305	0	0	0.81691
Escherichia coli	ARS-CC9624	G	G	GCA_002142445.1	5.25341	307	0	0	0.80294
Escherichia coli	KCJ9511	G	G	GCA_003173475.1	5.22688	194	0	0	0.81388
Escherichia coli	KCJ9499	G	G	GCA_003173535.1	5.17353	154	0	0	0.80464
Escherichia coli	KCJK6378	G	G	GCA_002810785.1	5.18176	191	0	0	0.80767
Escherichia coli	KCJK6320	G	G	GCA_002810775.1	5.18793	199	0	0	0.80859
Escherichia coli	KCJK5576	G	G	GCA_002099605.1	5.1514	157	0	0	0.80982
Escherichia coli	KCJK2104	G	G	GCA_002099535.1	5.15658	141	0	0	0.81008
Escherichia coli	KCJK1770	G	G	GCA_002212815.1	5.1497	151	0	0	0.80928
Escherichia coli	KCJK5581	G	G	GCA_002099665.1	5.15238	155	0	0	0.81029
Escherichia coli	KCJK1791	G	G	GCA_002212785.1	5.15072	154	0	0	0.80956
Escherichia coli	KCJK7063	G	G	GCA_002837295.1	5.13328	216	0	0	0.80052
Escherichia coli	KCJK7254	G	G	GCA_002837365.1	5.13146	402	0	0	0.8117
Escherichia coli	Spr2013_WWKa_OUT_5	G	G	GCA_003145715.1	5.22155	162	0	0	0.81392
Escherichia coli	N56738	G	G	GCA_002307635.1	5.39309	205	0	0	0.80246
Escherichia coli	MOD1-EC5814	G	G	GCA_002549655.1	5.12385	150	0	0	0.81542
Escherichia coli	ARS-CC9604	G	G	GCA_002142415.1	5.33059	340	0	0	0.81248
Escherichia coli	sc14-203	G	G	GCA_003008815.1	5.19963	167	0	0	0.8149
Escherichia coli	14EC020	G	G	GCA_002853715.1	5.14588	3	0	0	0.802
Escherichia coli	MOD1-EC6461	G	G	GCA_002485845.1	5.22912	159	0	0	0.80384
Escherichia coli HVH 188 (4-2356988)	HVH 188 (4-2356988)	G	G	GCA_000458825.1	5.09436	9	0	0	0.80964
Escherichia coli	BIDMC101	G	G	GCA_001030505.1	5.17577	10	0	0	0.81063
Escherichia coli	MOD1-EC5764	G	G	GCA_002474515.1	4.98295	212	0	0	0.80682
Escherichia coli	MOD1-EC5763	G	G	GCA_002518295.1	4.9074	202	0	0	0.81246
Escherichia coli	MOD1-EC6341	G	G	GCA_002511285.1	4.9312	200	0	0	0.81596
Escherichia coli 2-177-06_S4_C1	2-177-06_S4_C1	G	G	GCA_000704225.1	5.14465	102	0	0	0.81193
Escherichia coli	MOD1-EC6094	G	G	GCA_002537555.1	5.0395	183	0	0	0.81089
Escherichia coli	MOD1-EC6621	G	G	GCA_002485345.1	4.90502	128	0	0	0.81213
Escherichia coli	D10	G	G	GCA_001900735.1	5.24768	3	0	0	0.80364
Escherichia coli	MOD1-EC6886	G	G	GCA_002519945.1	5.182	260	0	0	0.81108
Escherichia coli	2.3-R3	G	G	GCA_002002045.1	5.27485	264	0	0	0.81432
Escherichia coli	2.3-R5	G	G	GCA_002002325.1	5.2835	268	0	0	0.81687
Escherichia coli	L4S4	G	G	GCA_003014845.1	5.2424	158	0	0	0.81578
Escherichia coli	L3S3	G	G	GCA_003013555.1	5.2556	255	0	0	0.80866
Escherichia coli	L5S5	G	G	GCA_003015075.1	5.10962	144	0	0	0.82141
Escherichia coli	L7S7	G	G	GCA_003015065.1	5.13335	162	0	0	0.81085
Escherichia coli	E44	G	G	GCA_001652345.1	5.12513	195	0	0	0.81088
Escherichia coli	MOD1-EC6541	G	G	GCA_002510345.1	5.29422	358	0	0	0.80666
Escherichia coli	MOD1-EC6214	G	G	GCA_002535165.1	5.31236	197	0	0	0.8092
Escherichia coli	cattle12	G	G	GCA_001614615.1	5.18626	98	0	0	0.81369
Escherichia coli	IHIT27704	G	G	GCA_001676985.1	5.45518	168	0	0	0.7888
Escherichia coli	708	G	G	GCA_001894395.1	5.61438	191	0	0	0.80616
Escherichia coli	EC4	G	G	GCA_000812325.1	5.20527	237	0	0	0.80046
Escherichia coli	2_Esco_CA-NL	G	G	GCA_002573025.1	5.26412	107	0	0	0.82056
Escherichia coli 53C	53C	G	G	GCA_000831715.2	5.56453	11	0	0	0.80794
Escherichia coli	MOD1-EC6548	G	G	GCA_002513015.1	5.29218	376	0	0	0.81248
Escherichia coli	N43684	G	G	GCA_002307655.1	5.27295	149	0	0	0.81595
Escherichia coli	Win2012_WWKa_NEU_19	G	G	GCA_003145215.1	5.18884	172	0	0	0.81454
Escherichia coli	HEC01	G	G	GCA_002490265.1	5.17834	231	0	0	0.80435
Escherichia coli	MOD1-EC5115	G	G	GCA_002231405.1	5.25548	229	0	0	0.80943
Escherichia coli N40513	N40513	G	G	GCA_001970045.1	5.12264	68	0	0	0.80517
Escherichia coli	MDR_56	G	G	GCA_002009315.1	5.46531	8	0	0	0.80855
Escherichia coli	N56041	G	G	GCA_002307595.1	5.38065	257	0	0	0.81545
Escherichia coli	EC5	G	G	GCA_000812345.1	5.2684	248	0	0	0.81597
Escherichia coli	EC7	G	G	GCA_000812365.1	5.27509	246	0	0	0.82992
Escherichia coli SEPT362	SEPT362	G	G	GCA_000340275.1	5.27995	173	0	0	0.81223
Escherichia coli	NA1002	G	G	GCA_002918005.1	5.25611	187	0	0	0.80411
Escherichia coli	MOD1-EC5176	B2	B2-1	GCA_002231645.1	5.11058	124	19	1	0.81364
Escherichia coli	MOD1-EC5940	B2	B2-1	GCA_002544665.1	5.15576	87	19	1	0.81146
Escherichia coli	MOD1-EC7008	B2	B2-1	GCA_002467895.1	5.06436	133	19	1	0.81241
Escherichia coli	upec-244	B2	B2-1	GCA_000778215.1	4.94325	75	18	1	0.82595
Escherichia coli	MOD1-EC5971	B2	B2-1	GCA_002514425.1	5.08941	78	19	1	0.82007
Escherichia coli	upec-38	B2	B2-1	GCA_000777195.1	4.92251	51	19	1	0.81692
Escherichia coli	MOD1-EC5125	B2	B2-1	GCA_002475155.1	5.09633	77	19	1	0.82819
Escherichia coli	MOD1-EC5124	B2	B2-1	GCA_002475175.1	5.21619	106	19	1	0.83024
Escherichia coli	MOD1-EC7006	B2	B2-1	GCA_002467285.1	5.20699	71	19	1	0.82694
Escherichia coli	GN02370	B2	B2-1	GCA_001520015.1	5.25931	201	19	1	0.81707
Escherichia coli	3.3-R2	B2	B2-1	GCA_002001595.1	5.05088	81	0	0	0.82562
Escherichia coli	GN02427	B2	B2-1	GCA_001520455.1	4.94755	93	0	0	0.80344
Escherichia coli	FDAARGOS_144	B2	B2-1	GCA_002944935.1	5.02215	4	0	0	0.81151
Escherichia coli M605	M605	B2	B2-1	GCA_000176555.2	5.47795	83	0	0	0.81985
Escherichia coli	upec-219	B2	B2-1	GCA_000778725.1	5.02312	62	0	0	0.81262
Escherichia coli AA86	AA86	B2	B2-1	GCA_000211395.1	4.98329	5	0	0	0.80836
Escherichia coli UMEA 3703-1	UMEA 3703-1	B2	B2-1	GCA_000461615.1	5.10674	17	0	0	0.81281
Escherichia coli HVH 162 (4-5627982)	HVH 162 (4-5627982)	B2	B2-1	GCA_000458455.1	5.32424	26	0	0	0.82486
Escherichia coli	MOD1-EC6350	B2	B2-1	GCA_002514055.1	5.03818	156	0	0	0.80955
Escherichia coli	GN03252	B2	B2-1	GCA_001520955.1	4.84352	197	0	0	0.80476
Escherichia coli	MOD1-EC5946	B2	B2-1	GCA_002514445.1	5.36553	207	0	0	0.82327
Escherichia coli	MOD1-EC6218	B2	B2-1	GCA_002463225.1	5.16525	199	0	0	0.82304
Escherichia coli	Ec-HUCA 3	B2	B2-1	GCA_002855655.1	4.92019	67	0	0	0.80734
Escherichia coli	upec-58	B2	B2-1	GCA_000776115.1	5.02396	43	0	0	0.80451
Escherichia coli	24901-2	B2	B2-1	GCA_003027835.1	4.92353	133	0	0	0.80791
Escherichia coli	MOD1-EC6955	B2	B2-1	GCA_002519185.1	4.96688	119	0	0	0.81254
Escherichia coli	MOD1-EC6200	B2	B2-1	GCA_002463335.1	4.93906	82	0	0	0.80997
Escherichia coli	FEX675	B2	B2-1	GCA_002930405.1	5.27013	211	0	0	0.82327
Escherichia coli HVH 108 (4-6924867)	HVH 108 (4-6924867)	B2	B2-1	GCA_000495095.1	5.25178	19	0	0	0.82525
Escherichia coli KTE28	KTE28	B2	B2-1	GCA_000350845.1	5.0544	12	0	0	0.81411
Escherichia coli	WH333	B2	B2-1	GCA_002930365.1	4.90122	84	0	0	0.81915
Escherichia coli	MOD1-EC5896	B2	B2-1	GCA_002517775.1	5.18118	159	0	0	0.81801
Escherichia coli	16144-2	B2	B2-1	GCA_003027555.1	5.1798	69	0	0	0.81899
Escherichia coli	RL158	B2	B2-1	GCA_900087675.1	5.14794	95	0	0	0.81206
Escherichia coli	MOD1-EC5839	B2	B2-1	GCA_002548675.1	5.23044	114	0	0	0.81575
Escherichia coli KTE23	KTE23	B2	B2-1	GCA_000352205.1	4.87693	6	0	0	0.81096
Escherichia coli	Chronic_salp	B2	B2-1	GCA_000951745.1	5.02846	135	0	0	0.81613
Escherichia coli KTE17	KTE17	B2	B2-1	GCA_000352125.1	4.91547	3	0	0	0.81776
Escherichia coli	MOD1-EC5077	B2	B2-1	GCA_002474455.1	4.87596	110	0	0	0.8016
Escherichia coli	Ec38	B2	B2-1	GCA_002895325.1	4.85295	32	0	0	0.80148
Escherichia coli	GN04208	B2	B2-1	GCA_001521435.1	4.94046	213	0	0	0.81067
Escherichia coli	GN02337	B2	B2-1	GCA_001519875.1	4.8312	45	0	0	0.82661
Escherichia coli KTE25	KTE25	B2	B2-1	GCA_000350805.1	4.99818	6	0	0	0.81713
Escherichia coli KTE18	KTE18	B2	B2-1	GCA_000352145.1	4.92586	8	0	0	0.81506
Escherichia coli KTE217	KTE217	B2	B2-1	GCA_000353085.1	4.95092	7	0	0	0.81544
Escherichia coli KTE150	KTE150	B2	B2-1	GCA_000326725.1	4.89222	55	0	0	0.81452
Escherichia coli	MOD1-EC5177	B2	B2-1	GCA_002230875.1	4.77105	82	0	0	0.80573
Escherichia coli	MOD1-EC6552	B2	B2-1	GCA_002512975.1	4.79523	201	0	0	0.81673
Escherichia coli	MOD1-EC6474	B2	B2-1	GCA_002462925.1	4.83262	90	0	0	0.80988
Escherichia coli	blood-09-0389	B2	B2-1	GCA_000782235.1	4.93504	33	0	0	0.81628
Escherichia coli	blood-09-0409	B2	B2-1	GCA_000782215.1	4.92939	36	0	0	0.81517
Escherichia coli KTE165	KTE165	B2	B2-1	GCA_000352765.1	4.75784	3	0	0	0.80643
Escherichia coli HVH 190 (4-3255514)	HVH 190 (4-3255514)	B2	B2-1	GCA_000465135.1	4.84978	6	0	0	0.79857
Escherichia coli UMEA 3155-1	UMEA 3155-1	B2	B2-1	GCA_000460395.1	4.91457	10	0	0	0.80439
Escherichia coli UMEA 3108-1	UMEA 3108-1	B2	B2-1	GCA_000460155.1	5.07871	38	0	0	0.81615
Escherichia coli	Spr2012_WWKa_NEU_31	B2	B2-1	GCA_003146175.1	5.06643	137	0	0	0.79586
Escherichia coli	GN05243	B2	B2-1	GCA_001621415.1	5.42548	267	0	0	0.81162
Escherichia coli	ST-131:E063	B2	B2-1	GCA_002416875.1	5.43815	338	0	0	0.8171
Escherichia coli	upec-97	B2	B2-1	GCA_000776395.1	5.31006	98	0	0	0.81851
Escherichia coli HVH 176 (4-3428664)	HVH 176 (4-3428664)	B2	B2-1	GCA_000458665.1	5.32695	13	0	0	0.81776
Escherichia coli	762_ECOL	B2	B2-1	GCA_001058375.1	5.15438	272	0	0	0.79982
Escherichia coli	GN02535	B2	B2-1	GCA_001519995.1	5.29363	390	0	0	0.81733
Escherichia coli	MB17684	B2	B2-1	GCA_001637905.1	5.18403	152	0	0	0.82099
Escherichia coli	184_ECOL	B2	B2-1	GCA_001055685.1	5.31761	211	0	0	0.81551
Escherichia coli	GN05833	B2	B2-1	GCA_001621755.1	5.28276	309	0	0	0.80641
Escherichia coli	Ecol_732	B2	B2-1	GCA_001617565.1	5.41829	7	0	0	0.80225
Escherichia coli BIDMC 70	BIDMC 70	B2	B2-1	GCA_000692495.1	5.1512	5	0	0	0.80814
Escherichia coli	Ecol_AZ161	B2	B2-1	GCA_002012265.1	5.17304	4	0	0	0.80884
Escherichia coli	blood-09-0074	B2	B2-1	GCA_000782295.1	5.27661	106	0	0	0.82224
Escherichia coli	blood-09-0450	B2	B2-1	GCA_000782175.1	5.28106	96	0	0	0.80487
Escherichia coli	blood-90145	B2	B2-1	GCA_000780255.1	5.4911	97	0	0	0.81042
Escherichia coli	blood-09-0558	B2	B2-1	GCA_000782135.1	5.48845	97	0	0	0.80757
Escherichia coli	blood-09-0341	B2	B2-1	GCA_000782255.1	5.29253	100	0	0	0.81675
Escherichia coli	MOD1-EC6135	B2	B2-1	GCA_002536105.1	5.11001	140	0	0	0.80856
Escherichia coli	109497	B2	B2-1	GCA_001562345.1	5.22156	99	0	0	0.8162
Escherichia coli	WCE233	B2	B2-1	GCA_001638225.1	5.13851	129	0	0	0.81159
Escherichia coli	GN05044	B2	B2-1	GCA_001621305.1	5.2431	162	0	0	0.79987
Escherichia coli	ST-131:E058	B2	B2-1	GCA_002528895.1	5.14366	110	0	0	0.80494
Escherichia coli	ST-131:E062	B2	B2-1	GCA_002416765.1	5.14214	177	0	0	0.81679
Escherichia coli	upec-159	B2	B2-1	GCA_000780175.1	5.18569	97	0	0	0.80713
Escherichia coli	YD736	B2	B2-1	GCA_002886545.1	5.20438	136	0	0	0.81664
Escherichia coli	GN06039	B2	B2-1	GCA_001621965.1	5.22114	206	0	0	0.80027
Escherichia coli	MOD1-EC6130	B2	B2-1	GCA_002535405.1	5.16146	182	0	0	0.8129
Escherichia coli	MOD1-EC6093	B2	B2-1	GCA_002540555.1	5.16031	178	0	0	0.80515
Escherichia coli	YDC134	B2	B2-1	GCA_002886915.1	5.23722	197	0	0	0.81638
Escherichia coli	972	B2	B2-1	GCA_001555635.1	5.22896	162	0	0	0.81942
Escherichia coli	B5	B2	B2-1	GCA_001561255.1	5.4311	262	0	0	0.82223
Escherichia coli	105438	B2	B2-1	GCA_001562385.1	5.22694	81	0	0	0.80661
Escherichia coli	YDC593	B2	B2-1	GCA_002887015.1	5.26856	149	0	0	0.80616
Escherichia coli	YDC419	B2	B2-1	GCA_002886745.1	5.31892	148	0	0	0.8108
Escherichia coli	WCE307	B2	B2-1	GCA_001640245.1	5.36082	273	0	0	0.81617
Escherichia coli 908691	908691	B2	B2-1	GCA_000488775.1	5.11581	144	0	0	0.8131
Escherichia coli	blood-11-0068	B2	B2-1	GCA_000780455.1	5.23632	94	0	0	0.80067
Escherichia coli	MRSN22624	B2	B2-1	GCA_000770285.1	5.18439	114	0	0	0.82374
Escherichia coli	E41-1	B2	B2-1	GCA_003194345.1	5.29104	4	0	0	0.8075
Escherichia coli	E41-2	B2	B2-1	GCA_003206175.1	5.16973	109	0	0	0.8128
Escherichia coli	YD439	B2	B2-1	GCA_002886825.1	5.28213	145	0	0	0.81796
Escherichia coli	blood-10-1610	B2	B2-1	GCA_000779935.1	5.50875	104	0	0	0.81781
Escherichia coli	blood-10-1607	B2	B2-1	GCA_000779775.1	5.50928	110	0	0	0.80752
Escherichia coli	BA14244	B2	B2-1	GCA_003007995.1	5.34921	219	0	0	0.81675
Escherichia coli	GN04094	B2	B2-1	GCA_001521615.1	5.18938	390	0	0	0.81193
Escherichia coli	BA9313	B2	B2-1	GCA_003008245.1	5.31247	151	0	0	0.81521
Escherichia coli	UCD-JA33	B2	B2-1	GCA_001306605.1	5.46172	147	0	0	0.8177
Escherichia coli	BIDMC113	B2	B2-1	GCA_001030675.1	5.49783	9	0	0	0.82419
Escherichia coli	BIDMC111	B2	B2-1	GCA_001030625.1	5.47383	16	0	0	0.80457
Escherichia coli	AR_0378	B2	B2-1	GCA_003075555.1	5.49616	7	0	0	0.8133
Escherichia coli	AR_0081	B2	B2-1	GCA_002996945.1	5.29638	4	0	0	0.8128
Escherichia coli UCI 51	UCI 51	B2	B2-1	GCA_000692795.1	5.31384	16	0	0	0.81169
Escherichia coli	E. coli ErtS	B2	B2-1	GCA_900041715.1	5.397	6	0	0	0.80353
Escherichia coli	E. coli ErtR	B2	B2-1	GCA_001517685.1	5.23503	154	0	0	0.81469
Escherichia coli 55989	55989	B2	B2-1	GCA_003028695.1	4.98988	1	0	0	0.80538
Escherichia coli	UCI104	B2	B2-1	GCA_002152175.1	5.43598	46	0	0	0.7996
Escherichia coli	FDAARGOS_441	B2	B2-1	GCA_002588125.1	5.19374	5	0	0	0.80472
Escherichia coli	TUM11481	B2	B2-1	GCA_003175395.1	4.98719	86	0	0	0.80272
Escherichia coli	GN04472	B2	B2-1	GCA_001620935.1	5.04937	311	0	0	0.80069
Escherichia coli	GN05367	B2	B2-1	GCA_001621465.1	5.01745	209	0	0	0.81239
Escherichia coli	GN06047	B2	B2-1	GCA_001621975.1	5.00502	173	0	0	0.80491
Escherichia coli	NA097	B2	B2-1	GCA_001029415.1	5.18855	187	0	0	0.81537
Escherichia coli	upec-143	B2	B2-1	GCA_000780615.1	5.16973	94	0	0	0.81065
Escherichia coli	2	B2	B2-1	GCA_900166685.1	5.12892	165	0	0	0.80452
Escherichia coli	GN05918	B2	B2-1	GCA_001621855.1	5.16698	271	0	0	0.80412
Escherichia coli 907701	907701	B2	B2-1	GCA_000488395.1	5.03082	149	0	0	0.81486
Escherichia coli	YD789	B2	B2-1	GCA_002886245.1	5.14454	130	0	0	0.81318
Escherichia coli	GN05793	B2	B2-1	GCA_001521675.1	4.97355	201	0	0	0.80429
Escherichia coli	Ecol_867	B2	B2-1	GCA_002012205.1	5.0658	4	0	0	0.80672
Escherichia coli	GN05779	B2	B2-1	GCA_001521655.1	5.1373	244	0	0	0.80912
Escherichia coli BIDMC 76	BIDMC 76	B2	B2-1	GCA_000692615.1	5.04001	10	0	0	0.80813
Escherichia coli	blood-08-1318	B2	B2-1	GCA_000782615.1	5.07704	76	0	0	0.79727
Escherichia coli	blood-08-1447	B2	B2-1	GCA_000782535.1	5.05013	86	0	0	0.80542
Escherichia coli	MNCRE47	B2	B2-1	GCA_000952225.1	5.0935	197	0	0	0.8029
Escherichia coli	MNCRE45	B2	B2-1	GCA_000952385.1	5.17725	227	0	0	0.79983
Escherichia coli	MNCRE44	B2	B2-1	GCA_000931565.1	5.29227	7	0	0	0.80813
Escherichia coli	MNCRE46	B2	B2-1	GCA_000952305.1	5.18004	209	0	0	0.80203
Escherichia coli	YDC304	B2	B2-1	GCA_002887185.1	5.27619	156	0	0	0.80943
Escherichia coli	blood-B-11-184	B2	B2-1	GCA_000780375.1	5.36094	125	0	0	0.81218
Escherichia coli	blood-11-0254	B2	B2-1	GCA_000779265.1	5.34403	118	0	0	0.80616
Escherichia coli	YDC462	B2	B2-1	GCA_002886725.1	5.11659	168	0	0	0.80782
Escherichia coli	GN02567	B2	B2-1	GCA_001519935.1	5.22394	337	0	0	0.81905
Escherichia coli	GN05509	B2	B2-1	GCA_001621565.1	5.12796	243	0	0	0.81195
Escherichia coli	GN04805	B2	B2-1	GCA_001621245.1	5.15015	195	0	0	0.81336
Escherichia coli	GN02422	B2	B2-1	GCA_001520515.1	5.09521	228	0	0	0.81603
Escherichia coli	GN02620	B2	B2-1	GCA_001520095.1	5.0013	303	0	0	0.8065
Escherichia coli	GN02779	B2	B2-1	GCA_001520655.1	5.08226	259	0	0	0.80426
Escherichia coli	GN04428	B2	B2-1	GCA_001620925.1	5.10539	370	0	0	0.8078
Escherichia coli	blood-08-1463	B2	B2-1	GCA_000782495.1	5.07607	67	0	0	0.8047
Escherichia coli	blood-08-1462	B2	B2-1	GCA_000782515.1	5.06227	95	0	0	0.80507
Escherichia coli	13	B2	B2-1	GCA_900166705.1	5.12843	139	0	0	0.81374
Escherichia coli	GN03415	B2	B2-1	GCA_001520615.1	5.08627	236	0	0	0.80501
Escherichia coli	13_Esco_HA-NL	B2	B2-1	GCA_002573265.1	5.0239	97	0	0	0.80791
Escherichia coli	ST-131:E013	B2	B2-1	GCA_002416555.1	5.08388	176	0	0	0.79928
Escherichia coli	UCD-JA16	B2	B2-1	GCA_001306655.1	5.05871	83	0	0	0.80675
Escherichia coli	F283	B2	B2-1	GCA_001561845.1	5.09372	145	0	0	0.81393
Escherichia coli	GN04612	B2	B2-1	GCA_001621065.1	5.03819	265	0	0	0.80844
Escherichia coli	upec-15	B2	B2-1	GCA_000780435.1	5.09081	159	0	0	0.811
Escherichia coli	GN05734	B2	B2-1	GCA_001521535.1	5.05909	225	0	0	0.80773
Escherichia coli	NAEC1	B2	B2-1	GCA_002918065.1	5.15219	138	0	0	0.80584
Escherichia coli	YDC717	B2	B2-1	GCA_002886325.1	5.17257	148	0	0	0.8155
Escherichia coli	upec-50	B2	B2-1	GCA_000776995.1	5.0809	135	0	0	0.80769
Escherichia coli	3020	B2	B2-1	GCA_001561205.1	5.078	126	0	0	0.82241
Escherichia coli	O25b-ST131	B2	B2-1	GCA_000681435.1	5.15343	202	0	0	0.81576
Escherichia coli	2963	B2	B2-1	GCA_001561105.1	5.11814	152	0	0	0.8069
Escherichia coli	81009	B2	B2-1	GCA_002157245.1	5.1478	2	0	0	0.8055
Escherichia coli	H105	B2	B2-1	GCA_002193095.1	5.11324	2	0	0	0.80921
Escherichia coli	MRSN17749	B2	B2-1	GCA_000770275.1	5.04646	92	0	0	0.81701
Escherichia coli	KO198B	B2	B2-1	GCA_001638005.1	5.0568	107	0	0	0.80894
Escherichia coli	KO178B	B2	B2-1	GCA_001637865.1	5.06035	131	0	0	0.80319
Escherichia coli 11117	11117	B2	B2-1	GCA_000699385.1	5.26259	182	0	0	0.79643
Escherichia coli 10810	10810	B2	B2-1	GCA_000699305.1	5.02994	644	0	0	0.77248
Escherichia coli	GN02612	B2	B2-1	GCA_001520075.1	5.29002	329	0	0	0.80593
Escherichia coli	MGH107	B2	B2-1	GCA_001030345.1	5.22497	5	0	0	0.80879
Escherichia coli	GN02669	B2	B2-1	GCA_001520755.1	5.16083	338	0	0	0.80699
Escherichia coli	Ecol_276	B2	B2-1	GCA_002011965.1	5.12631	5	0	0	0.80484
Escherichia coli	HS115	B2	B2-1	GCA_001561895.1	5.11046	164	0	0	0.79727
Escherichia coli	YD749	B2	B2-1	GCA_002886475.1	5.35571	232	0	0	0.81004
Escherichia coli	YDC354	B2	B2-1	GCA_002886755.1	5.25653	151	0	0	0.81203
Escherichia coli 907700	907700	B2	B2-1	GCA_000488375.1	5.0379	127	0	0	0.80885
Escherichia coli	upec-90	B2	B2-1	GCA_000776835.1	5.21103	164	0	0	0.81407
Escherichia coli	AR_0058	B2	B2-1	GCA_002180195.1	5.10349	2	0	0	0.80993
Escherichia coli	1223	B2	B2-1	GCA_001647395.1	5.07851	135	0	0	0.81502
Escherichia coli	GN04014	B2	B2-1	GCA_001524895.1	5.11552	341	0	0	0.81025
Escherichia coli	GN02556	B2	B2-1	GCA_001521175.1	5.12364	319	0	0	0.81156
Escherichia coli	8	B2	B2-1	GCA_900166765.1	5.04662	112	0	0	0.81029
Escherichia coli	MB3323	B2	B2-1	GCA_001638125.1	5.04185	135	0	0	0.79815
Escherichia coli	GN02560	B2	B2-1	GCA_001521205.1	5.1662	362	0	0	0.81221
Escherichia coli	OS_07_001_6	B2	B2-1	GCA_002087465.1	5.27854	14	0	0	0.81735
Escherichia coli	534_SBOY	B2	B2-1	GCA_001063685.1	5.20638	202	0	0	0.82294
Escherichia coli	GN04318	B2	B2-1	GCA_001521495.1	5.18296	244	0	0	0.80137
Escherichia coli	MB14972	B2	B2-1	GCA_001637945.1	5.10953	181	0	0	0.81246
Escherichia coli LAU-EC2	LAU-EC2	B2	B2-1	GCA_000498795.2	5.17825	118	0	0	0.80833
Escherichia coli	GN02441	B2	B2-1	GCA_001520405.1	5.1727	236	0	0	0.79826
Escherichia coli	YD705	B2	B2-1	GCA_002886525.1	5.32462	160	0	0	0.80922
Escherichia coli	YD673	B2	B2-1	GCA_002887045.1	5.31532	170	0	0	0.80508
Escherichia coli	39888	B2	B2-1	GCA_002181625.1	5.19477	104	0	0	0.80128
Escherichia coli	YD748	B2	B2-1	GCA_002886465.1	5.18873	147	0	0	0.81018
Escherichia coli	YDC735	B2	B2-1	GCA_002886295.1	5.2201	136	0	0	0.80902
Escherichia coli	215-2646	B2	B2-1	GCA_002244115.1	5.25728	19	0	0	0.81308
Escherichia coli	215-2730	B2	B2-1	GCA_002244095.1	5.23398	10	0	0	0.81564
Escherichia coli	GN02699	B2	B2-1	GCA_001521135.1	5.26175	429	0	0	0.81025
Escherichia coli	GN06130	B2	B2-1	GCA_001622045.1	5.23042	374	0	0	0.81633
Escherichia coli	GN02500	B2	B2-1	GCA_001520535.1	5.19016	428	0	0	0.82008
Escherichia coli	B47	B2	B2-1	GCA_001561415.1	5.13913	258	0	0	0.81896
Escherichia coli	GN02657	B2	B2-1	GCA_001520635.1	5.2149	315	0	0	0.81579
Escherichia coli	3140	B2	B2-1	GCA_001561115.1	5.20682	165	0	0	0.80983
Escherichia coli	ZH193	B2	B2-1	GCA_001566675.1	5.25638	2	0	0	0.8141
Escherichia coli	GN05107	B2	B2-1	GCA_001621325.1	5.15326	271	0	0	0.8083
Escherichia coli	GN02388	B2	B2-1	GCA_001520035.1	5.24619	261	0	0	0.81112
Escherichia coli	M8	B2	B2-1	GCA_001637885.1	5.22341	136	0	0	0.81569
Escherichia coli	WCE266	B2	B2-1	GCA_001637825.1	5.23833	175	0	0	0.80788
Escherichia coli	WCE296	B2	B2-1	GCA_001638155.1	5.23802	188	0	0	0.81946
Escherichia coli	GN04488	B2	B2-1	GCA_001620905.1	5.24971	359	0	0	0.81374
Escherichia coli BIDMC 79	BIDMC 79	B2	B2-1	GCA_000692675.1	5.17543	14	0	0	0.811
Escherichia coli NB8	NB8	B2	B2-1	GCA_000982875.1	5.11745	126	0	0	0.81306
Escherichia coli	OS_07_001_-1	B2	B2-1	GCA_002087455.1	5.12777	17	0	0	0.81196
Escherichia coli	upec-4	B2	B2-1	GCA_000777155.1	5.08321	128	0	0	0.8061
Escherichia coli 908524	908524	B2	B2-1	GCA_000488555.1	4.99454	140	0	0	0.81364
Escherichia coli	B46	B2	B2-1	GCA_001561365.1	4.99189	112	0	0	0.79719
Escherichia coli	ECONIH7	B2	B2-1	GCA_002918765.1	5.14173	83	0	0	0.80346
Escherichia coli BIDMC 75	BIDMC 75	B2	B2-1	GCA_000692595.1	5.11777	15	0	0	0.81557
Escherichia coli	GN05855	B2	B2-1	GCA_001621805.1	5.18013	211	0	0	0.80494
Escherichia coli	GN03135	B2	B2-1	GCA_001520475.1	5.22125	361	0	0	0.81794
Escherichia coli	TUM13620	B2	B2-1	GCA_003175555.1	5.27911	385	0	0	0.80166
Escherichia coli	GN02758	B2	B2-1	GCA_001520795.1	5.15006	222	0	0	0.79919
Escherichia coli	ECBSI31-SJH	B2	B2-1	GCA_002749835.1	5.08818	101	0	0	0.80246
Escherichia coli	1019	B2	B2-1	GCA_001647315.1	5.10556	140	0	0	0.80998
Escherichia coli	blood-11-0067	B2	B2-1	GCA_000780395.1	5.17604	87	0	0	0.80471
Escherichia coli	35_Esco_HA-NL	B2	B2-1	GCA_002631585.1	5.05871	124	0	0	0.81496
Escherichia coli	35b_Esco_HA-NL	B2	B2-1	GCA_002631565.1	4.98961	235	0	0	0.80092
Escherichia coli BIDMC 63	BIDMC 63	B2	B2-1	GCA_000692435.1	5.16234	6	0	0	0.81181
Escherichia coli	GN02363	B2	B2-1	GCA_001520295.1	5.12397	308	0	0	0.81851
Escherichia coli	GN05705	B2	B2-1	GCA_001521515.1	4.99938	203	0	0	0.81472
Escherichia coli	upec-171	B2	B2-1	GCA_000780015.1	5.01358	85	0	0	0.80755
Escherichia coli	Ecol_AZ153	B2	B2-1	GCA_002012245.1	5.25275	5	0	0	0.81189
Escherichia coli	AR_0370	B2	B2-1	GCA_003000675.1	5.1726	2	0	0	0.81105
Escherichia coli HVH 186 (4-3405044)	HVH 186 (4-3405044)	B2	B2-1	GCA_000458785.1	5.41478	56	0	0	0.80895
Escherichia coli 908632	908632	B2	B2-1	GCA_000488715.1	5.04883	162	0	0	0.80799
Escherichia coli	GN03599	B2	B2-1	GCA_001520975.1	5.09122	303	0	0	0.81015
Escherichia coli	1087	B2	B2-1	GCA_001647345.1	5.07831	136	0	0	0.80575
Escherichia coli	GN04563	B2	B2-1	GCA_001621035.2	5.166	3	0	0	0.80671
Escherichia coli BIDMC 78	BIDMC 78	B2	B2-1	GCA_000692655.1	5.16763	7	0	0	0.81158
Escherichia coli	upec-212	B2	B2-1	GCA_000778475.1	5.09291	90	0	0	0.8116
Escherichia coli	upec-259	B2	B2-1	GCA_000777945.1	5.17739	75	0	0	0.80666
Escherichia coli	upec-125	B2	B2-1	GCA_000781005.1	5.1125	98	0	0	0.79774
Escherichia coli	Ec-HUCA 6	B2	B2-1	GCA_002855695.1	5.2666	125	0	0	0.81588
Escherichia coli LAU-EC3	LAU-EC3	B2	B2-1	GCA_000498815.2	5.3118	113	0	0	0.81978
Escherichia coli	Ec-HUCA 7	B2	B2-1	GCA_002855615.1	5.2382	128	0	0	0.81074
Escherichia coli	Ec-HUCA 5	B2	B2-1	GCA_002855635.1	5.18996	173	0	0	0.80165
Escherichia coli	SCB34	B2	B2-1	GCA_000695505.1	5.22915	81	0	0	0.81731
Escherichia coli	GN04997	B2	B2-1	GCA_001621265.1	5.1449	109	0	0	0.81304
Escherichia coli	EC193	B2	B2-1	GCA_002507495.1	5.26641	111	0	0	0.81279
Escherichia coli	GN04757	B2	B2-1	GCA_001621205.1	5.27636	420	0	0	0.8084
Escherichia coli	GN06028	B2	B2-1	GCA_001621945.1	5.18448	196	0	0	0.80754
Escherichia coli	NA633	B2	B2-1	GCA_002407315.1	5.27543	81	0	0	0.8078
Escherichia coli 2-460-02_S1_C3	2-460-02_S1_C3	B2	B2-1	GCA_000711485.1	5.54419	122	0	0	0.81744
Escherichia coli 2-427-07_S4_C2	2-427-07_S4_C2	B2	B2-1	GCA_000704445.1	5.56062	141	0	0	0.82607
Escherichia coli 2-460-02_S1_C2	2-460-02_S1_C2	B2	B2-1	GCA_000713865.1	5.65911	172	0	0	0.81909
Escherichia coli	Ecol_656	B2	B2-1	GCA_002012065.1	5.40514	3	0	0	0.81526
Escherichia coli	B16	B2	B2-1	GCA_001561275.1	5.2715	194	0	0	0.81907
Escherichia coli	B150	B2	B2-1	GCA_001561765.1	5.34279	212	0	0	0.81749
Escherichia coli NA114	NA114	B2	B2-1	GCA_000214765.2	5.24618	105	0	0	0.81229
Escherichia coli	B94	B2	B2-1	GCA_001561515.1	5.29872	188	0	0	0.81676
Escherichia coli	B77	B2	B2-1	GCA_001561655.1	5.29796	187	0	0	0.81955
Escherichia coli	B75	B2	B2-1	GCA_001561595.1	5.30795	200	0	0	0.81195
Escherichia coli	B133	B2	B2-1	GCA_001561815.1	5.30832	193	0	0	0.81403
Escherichia coli	BWH55	B2	B2-1	GCA_001030365.1	5.38143	8	0	0	0.80512
Escherichia coli O25b:H4	O25b:H4	B2	B2-1	GCA_001874485.1	5.48309	4	0	0	0.81386
Escherichia coli CHS 69	CHS 69	B2	B2-1	GCA_000692715.1	5.38874	12	0	0	0.81618
Escherichia coli	662_ECOL	B2	B2-1	GCA_001057815.1	5.26787	354	0	0	0.81247
Escherichia coli	R0007_199	B2	B2-1	GCA_900239825.1	5.27822	183	0	0	0.80612
Escherichia coli	ECH+07	B2	B2-1	GCA_002248905.1	5.34874	128	0	0	0.81481
Escherichia coli	ST-131:E011	B2	B2-1	GCA_002510165.1	5.36642	274	0	0	0.82265
Escherichia coli	FDAARGOS_142	B2	B2-1	GCA_001471815.2	5.68307	13	0	0	0.82169
Escherichia coli	2051/3071	B2	B2-1	GCA_002936145.2	5.2835	129	0	0	0.8127
Escherichia coli	50676002	B2	B2-1	GCA_001463195.1	5.48354	190	0	0	0.80197
Escherichia coli	751	B2	B2-1	GCA_002885875.1	5.21612	246	0	0	0.81594
Escherichia coli	ESBL-SIPE-13	B2	B2-1	GCA_002239795.1	5.34104	131	0	0	0.80926
Escherichia coli	ECPUTH02	B2	B2-1	GCA_002248255.1	5.34222	127	0	0	0.81073
Escherichia coli	ESBL-SIUE-16	B2	B2-1	GCA_002239785.1	5.34178	120	0	0	0.80933
Escherichia coli	B104	B2	B2-1	GCA_001561755.1	5.34002	171	0	0	0.82123
Escherichia coli	blood-08-0632	B2	B2-1	GCA_000782715.1	5.46763	127	0	0	0.81171
Escherichia coli	blood-10-0223	B2	B2-1	GCA_000781695.1	5.4807	125	0	0	0.80891
Escherichia coli	blood-09-0428	B2	B2-1	GCA_000782195.1	5.48467	113	0	0	0.81509
Escherichia coli IS29	IS29	B2	B2-1	GCA_000529975.1	5.42425	132	0	0	0.81048
Escherichia coli	ST-131:E005	B2	B2-1	GCA_002528825.1	5.31503	143	0	0	0.80782
Escherichia coli	ST-131:E009	B2	B2-1	GCA_002528885.1	5.31248	164	0	0	0.80473
Escherichia coli	NA643	B2	B2-1	GCA_002407375.1	5.32206	112	0	0	0.80807
Escherichia coli	1256/2131	B2	B2-1	GCA_002936495.2	5.28361	134	0	0	0.8045
Escherichia coli	upec-142	B2	B2-1	GCA_000780635.1	5.26265	186	0	0	0.80364
Escherichia coli	105454	B2	B2-1	GCA_001601655.1	5.33525	101	0	0	0.81391
Escherichia coli	blood-08-0921	B2	B2-1	GCA_000782675.1	5.47183	139	0	0	0.81219
Escherichia coli	GN05426	B2	B2-1	GCA_001621485.1	5.14775	216	0	0	0.81324
Escherichia coli 907779	907779	B2	B2-1	GCA_000485715.1	5.14644	148	0	0	0.80767
Escherichia coli	426_SBOY	B2	B2-1	GCA_001063395.1	5.14405	127	0	0	0.80965
Escherichia coli	425_SBOY	B2	B2-1	GCA_001064885.1	5.30205	119	0	0	0.80807
Escherichia coli	upec-162	B2	B2-1	GCA_000780135.1	5.17982	105	0	0	0.80426
Escherichia coli	WCE208	B2	B2-1	GCA_001638205.1	5.19611	262	0	0	0.80849
Escherichia coli	blood-10-0913	B2	B2-1	GCA_000781485.1	5.26967	163	0	0	0.81721
Escherichia coli	blood-10-0899rep1	B2	B2-1	GCA_000781515.1	5.34482	108	0	0	0.81354
Escherichia coli	YDC345	B2	B2-1	GCA_002887175.1	5.27859	140	0	0	0.8049
Escherichia coli	GN05443	B2	B2-1	GCA_001621515.1	5.22584	220	0	0	0.80974
Escherichia coli	FC10237	B2	B2-1	GCA_002223495.1	5.23592	115	0	0	0.8118
Escherichia coli	852	B2	B2-1	GCA_001555495.1	5.1449	83	0	0	0.80447
Escherichia coli O25b:H4-ST131	UR40	B2	B2-1	GCA_001940375.1	5.26776	90	0	0	0.80529
Escherichia coli	AR_0104	B2	B2-1	GCA_002056635.1	5.26203	4	0	0	0.80333
Escherichia coli	GN02597	B2	B2-1	GCA_001621705.1	5.27845	359	0	0	0.8156
Escherichia coli	1307.rep1_ECOL	B2	B2-1	GCA_001053295.1	5.21509	301	0	0	0.81256
Escherichia coli	RDK40_71E	B2	B2-1	GCA_900239885.1	5.44083	255	0	0	0.80538
Escherichia coli	R0007_210	B2	B2-1	GCA_900239805.1	5.37927	178	0	0	0.80458
Escherichia coli	RDK04_603	B2	B2-1	GCA_900239905.1	5.34628	197	0	0	0.81344
Escherichia coli BWH 24	BWH 24	B2	B2-1	GCA_000474845.1	5.43461	4	0	0	0.81519
Escherichia coli BWH 34	BWH 34	B2	B2-1	GCA_000522345.1	5.41202	4	0	0	0.81533
Escherichia coli	AR_0001	B2	B2-1	GCA_001874785.1	5.46874	4	0	0	0.81254
Escherichia coli BIDMC 62	BIDMC 62	B2	B2-1	GCA_000692415.1	5.3923	12	0	0	0.81395
Escherichia coli BIDMC 58	BIDMC 58	B2	B2-1	GCA_000692375.1	5.38093	13	0	0	0.81557
Escherichia coli BIDMC 20A	BIDMC 20A	B2	B2-1	GCA_000522145.1	5.37328	7	0	0	0.81468
Escherichia coli BIDMC 20B	BIDMC 20B	B2	B2-1	GCA_000522125.1	5.35096	5	0	0	0.81224
Escherichia coli BIDMC 64	BIDMC 64	B2	B2-1	GCA_000692455.1	5.35612	13	0	0	0.81433
Escherichia coli	Ecol_AZ162	B2	B2-1	GCA_002012165.1	5.35187	3	0	0	0.80487
Escherichia coli	GN05826	B2	B2-1	GCA_001621725.1	5.17984	360	0	0	0.8053
Escherichia coli	11	B2	B2-1	GCA_900166735.1	5.54376	1285	0	0	0.74796
Escherichia coli	6	B2	B2-1	GCA_900166835.1	5.15205	123	0	0	0.81231
Escherichia coli	1	B2	B2-1	GCA_900166815.1	5.0968	128	0	0	0.79971
Escherichia coli	GN05002	B2	B2-1	GCA_001621275.1	5.14567	195	0	0	0.80657
Escherichia coli	14	B2	B2-1	GCA_900166745.1	5.30574	616	0	0	0.80948
Escherichia coli	16	B2	B2-1	GCA_900166715.1	5.26355	472	0	0	0.79657
Escherichia coli	7	B2	B2-1	GCA_900166805.1	5.14791	235	0	0	0.80348
Escherichia coli	3	B2	B2-1	GCA_900166695.1	5.18892	262	0	0	0.80917
Escherichia coli	12	B2	B2-1	GCA_900166795.1	5.21968	367	0	0	0.81884
Escherichia coli	4	B2	B2-1	GCA_900166785.1	5.19222	250	0	0	0.81095
Escherichia coli	5	B2	B2-1	GCA_900166855.1	5.18586	275	0	0	0.80538
Escherichia coli	25-541	B2	B2-1	GCA_002244415.1	5.28335	36	0	0	0.81417
Escherichia coli	25-420	B2	B2-1	GCA_002244615.1	5.29128	12	0	0	0.81092
Escherichia coli	25-468	B2	B2-1	GCA_002244385.1	5.28675	19	0	0	0.81777
Escherichia coli	25-462	B2	B2-1	GCA_002244375.1	5.26505	22	0	0	0.8149
Escherichia coli	25-367	B2	B2-1	GCA_002245165.1	5.29474	11	0	0	0.81641
Escherichia coli	1380	B2	B2-1	GCA_001561035.1	5.41571	408	0	0	0.81689
Escherichia coli	U79	B2	B2-1	GCA_001640205.1	5.31606	202	0	0	0.80955
Escherichia coli	B89	B2	B2-1	GCA_001561605.1	5.35213	216	0	0	0.8201
Escherichia coli	B58	B2	B2-1	GCA_001561495.1	5.25935	177	0	0	0.81186
Escherichia coli	AR_0055	B2	B2-1	GCA_002202175.1	5.50608	4	0	0	0.81247
Escherichia coli	UCD_JA62	B2	B2-1	GCA_000599785.2	5.33131	138	0	0	0.82106
Escherichia coli	ST-131:E056	B2	B2-1	GCA_002416935.1	5.21748	277	0	0	0.82653
Escherichia coli	MGH144	B2	B2-1	GCA_002152075.1	5.29383	8	0	0	0.81663
Escherichia coli	RDK02_567B	B2	B2-1	GCA_900239865.1	5.22174	115	0	0	0.80612
Escherichia coli	R0009_587	B2	B2-1	GCA_900239855.1	5.22093	116	0	0	0.80707
Escherichia coli	U44	B2	B2-1	GCA_001638045.1	5.18534	137	0	0	0.81242
Escherichia coli	GN02631	B2	B2-1	GCA_001519915.1	5.29721	438	0	0	0.80483
Escherichia coli	GN04228	B2	B2-1	GCA_001521395.1	5.19026	316	0	0	0.80608
Escherichia coli	3134	B2	B2-1	GCA_001561215.1	5.07324	111	0	0	0.80008
Escherichia coli	1369	B2	B2-1	GCA_001561025.1	5.16512	128	0	0	0.81366
Escherichia coli	1402	B2	B2-1	GCA_001561015.1	5.13979	153	0	0	0.8138
Escherichia coli	1039	B2	B2-1	GCA_001647325.1	5.10778	114	0	0	0.81429
Escherichia coli	1389	B2	B2-1	GCA_001561095.1	5.10704	111	0	0	0.8002
Escherichia coli	ECH+22	B2	B2-1	GCA_002248225.1	5.20179	133	0	0	0.81258
Escherichia coli	HP47	B2	B2-1	GCA_001561865.1	5.29105	191	0	0	0.81284
Escherichia coli	RDK40_73	B2	B2-1	GCA_900239875.1	5.33622	478	0	0	0.79899
Escherichia coli	RDK40_70	B2	B2-1	GCA_900239895.1	5.17784	135	0	0	0.80173
Escherichia coli BIDMC 38	BIDMC 38	B2	B2-1	GCA_000492255.1	5.26985	15	0	0	0.81667
Escherichia coli O25b:H4-ST131	EC958	B2	B2-1	GCA_000285655.3	5.24945	3	0	0	0.81239
Escherichia coli	uk_P46212	B2	B2-1	GCA_001469815.1	5.25041	2	0	0	0.81285
Escherichia coli	NCTC 13441	B2	B2-1	GCA_900119685.1	5.3357	2	0	0	0.80921
Escherichia coli	blood-B11-136	B2	B2-1	GCA_000779745.1	5.34112	114	0	0	0.80601
Escherichia coli	58-882	B2	B2-1	GCA_002244535.1	5.24167	10	0	0	0.81071
Escherichia coli	58-1129	B2	B2-1	GCA_002244545.1	5.25137	13	0	0	0.81552
Escherichia coli	58-809	B2	B2-1	GCA_002244515.1	5.25832	9	0	0	0.81581
Escherichia coli JJ1887	JJ1887	B2	B2-1	GCA_001593565.1	5.33152	6	0	0	0.81625
Escherichia coli JJ1886	JJ1886	B2	B2-1	GCA_000493755.1	5.30828	6	0	0	0.81362
Escherichia coli	GN02501	B2	B2-1	GCA_001520355.1	5.27069	373	0	0	0.80615
Escherichia coli	upec-148	B2	B2-1	GCA_000780495.1	5.30224	195	0	0	0.81364
Escherichia coli	upec-176	B2	B2-1	GCA_000779895.1	5.45095	88	0	0	0.8178
Escherichia coli	GN02546	B2	B2-1	GCA_001520675.1	5.37109	448	0	0	0.8165
Escherichia coli	MEEI01	B2	B2-1	GCA_001442595.1	5.21018	80	0	0	0.81368
Escherichia coli	B125	B2	B2-1	GCA_001561785.1	5.19046	149	0	0	0.81104
Escherichia coli	GN03132	B2	B2-1	GCA_001521095.1	5.1569	296	0	0	0.81785
Escherichia coli	LV27950	B2	B2-1	GCA_001563415.1	5.15399	204	0	0	0.80793
Escherichia coli	LV36464	B2	B2-1	GCA_001563395.1	5.18035	136	0	0	0.80367
Escherichia coli	38.ii.h	B2	B2-1	GCA_002284815.1	5.30051	134	0	0	0.81426
Escherichia coli	141	B2	B2-1	GCA_002284685.1	5.30554	130	0	0	0.81373
Escherichia coli	NA101	B2	B2-1	GCA_002224795.1	5.28601	175	0	0	0.81647
Escherichia coli	ST-131:E060	B2	B2-1	GCA_002528925.1	5.19589	146	0	0	0.807
Escherichia coli	NA112	B2	B2-1	GCA_002224745.1	5.14859	168	0	0	0.80103
Escherichia coli	Ecol_542	B2	B2-1	GCA_002012025.1	5.39532	5	0	0	0.79752
Escherichia coli	B65	B2	B2-1	GCA_001561285.1	5.20916	136	0	0	0.80951
Escherichia coli	E4	B2	B2-1	GCA_001561505.1	5.16872	282	0	0	0.8034
Escherichia coli	MGH143	B2	B2-1	GCA_002153005.1	5.42633	19	0	0	0.80939
Escherichia coli	MGH129	B2	B2-1	GCA_002163295.1	5.54968	19	0	0	0.80818
Escherichia coli	ST-131:E021	B2	B2-1	GCA_002416785.1	5.23657	389	0	0	0.80685
Escherichia coli	GN05516	B2	B2-1	GCA_001621575.1	5.26232	283	0	0	0.80722
Escherichia coli	26_Esco_HA-NL	B2	B2-1	GCA_002442015.1	5.11643	89	0	0	0.80386
Escherichia coli	B95	B2	B2-1	GCA_001561685.1	5.20877	152	0	0	0.80347
Escherichia coli	U2	B2	B2-1	GCA_001638065.1	5.20972	141	0	0	0.80364
Escherichia coli LAU-EC7	LAU-EC7	B2	B2-1	GCA_000506465.2	5.28113	76	0	0	0.80436
Escherichia coli	BWH61	B2	B2-1	GCA_001030325.1	5.28576	17	0	0	0.81564
Escherichia coli	BWH60	B2	B2-1	GCA_001030305.1	5.28364	12	0	0	0.81331
Escherichia coli	MOD1-EC6116	B2	B2-1	GCA_002463555.1	5.14804	145	0	0	0.8092
Escherichia coli	JJ2434	B2	B2-1	GCA_001513635.1	5.3171	3	0	0	0.81252
Escherichia coli	CD306	B2	B2-1	GCA_001513615.1	5.21904	2	0	0	0.81373
Escherichia coli CHS 68	CHS 68	B2	B2-1	GCA_000692695.1	5.27658	15	0	0	0.81003
Escherichia coli KTE49	KTE49	B2	B2-1	GCA_000351445.1	5.26373	6	0	0	0.81564
Escherichia coli HVH 84 (4-1021478)	HVH 84 (4-1021478)	B2	B2-1	GCA_000457185.1	5.24197	7	0	0	0.81009
Escherichia coli HVH 205 (4-3094677)	HVH 205 (4-3094677)	B2	B2-1	GCA_000459155.1	5.38792	13	0	0	0.82591
Escherichia coli	CCUG 62462	B2	B2-1	GCA_001661055.2	5.26633	119	0	0	0.80576
Escherichia coli	U92	B2	B2-1	GCA_001638165.1	5.28721	191	0	0	0.81546
Escherichia coli	EC191	B2	B2-1	GCA_002507455.1	5.04385	41	0	0	0.80353
Escherichia coli HVH 146 (4-3189767)	HVH 146 (4-3189767)	B2	B2-1	GCA_000458175.1	5.40238	7	0	0	0.82171
Escherichia coli	1011	B2	B2-1	GCA_001647335.1	5.09968	106	0	0	0.81462
Escherichia coli KTE178	KTE178	B2	B2-1	GCA_000350905.1	5.30789	11	0	0	0.81374
Escherichia coli	11.3-R3	B2	B2-1	GCA_002001945.1	5.21853	139	0	0	0.81672
Escherichia coli HVH 17 (4-7473087)	HVH 17 (4-7473087)	B2	B2-1	GCA_000456225.1	5.27649	18	0	0	0.817
Escherichia coli	3019	B2	B2-1	GCA_001561175.1	5.20214	108	0	0	0.81862
Escherichia coli HVH 141 (4-5995973)	HVH 141 (4-5995973)	B2	B2-1	GCA_000458075.1	5.20231	5	0	0	0.82408
Escherichia coli	B48	B2	B2-1	GCA_001561435.1	5.18806	166	0	0	0.81933
Escherichia coli	MOD1-EC6699	B2	B2-1	GCA_002521555.1	5.03956	202	0	0	0.80858
Escherichia coli	35-593	B2	B2-1	GCA_002243765.1	5.11484	7	0	0	0.81178
Escherichia coli	G749	B2	B2-1	GCA_001566635.1	5.21997	4	0	0	0.8147
Escherichia coli	Ecol_AZ159	B2	B2-1	GCA_002012145.1	5.10193	3	0	0	0.80633
Escherichia coli	EC192	B2	B2-1	GCA_002507485.1	5.05741	81	0	0	0.81285
Escherichia coli	107-1461	B2	B2-1	GCA_002244995.1	5.20778	23	0	0	0.81484
Escherichia coli	MB3298	B2	B2-1	GCA_001638025.1	5.14214	140	0	0	0.80991
Escherichia coli	Spr2013_WWKa_ALT_43	B2	B2-1	GCA_003145935.1	5.02904	154	0	0	0.80528
Escherichia coli	MOD1-EC6883	B2	B2-1	GCA_002520015.1	5.11796	107	0	0	0.81123
Escherichia coli	MOD1-EC5458	B2	B2-1	GCA_002230095.1	4.96872	158	0	0	0.80444
Escherichia coli	TUM13736	B2	B2-1	GCA_003175575.1	5.06145	123	0	0	0.80288
Escherichia coli HVH 177 (4-2876612)	HVH 177 (4-2876612)	B2	B2-1	GCA_000507645.1	5.06276	8	0	0	0.8154
Escherichia coli	S250	B2	B2-1	GCA_001648715.1	4.97819	50	0	0	0.80555
Escherichia coli	14747-1	B2	B2-1	GCA_003027505.1	5.03819	69	0	0	0.806
Escherichia coli	IMT26197	B2	B2-1	GCA_001675705.1	4.96145	844	0	0	0.79785
Escherichia coli	HT2012136	B2	B2-1	GCA_002973175.1	5.16283	194	0	0	0.82279
Escherichia coli	HT2012131	B2	B2-1	GCA_002972715.1	5.0598	135	0	0	0.79729
Escherichia coli	strain Z247	B2	B2-1	GCA_002142715.1	5.40007	4	0	0	0.80765
Escherichia coli	MOD1-EC7007	B2	B2-1	GCA_002467885.1	5.32042	92	0	0	0.80168
Escherichia coli	F2_56	B2	B2-1	GCA_900196295.1	5.41627	75	0	0	0.82106
Escherichia coli	Ecol_244	B2	B2-1	GCA_002012305.1	5.38306	5	0	0	0.81181
Escherichia coli	2999	B2	B2-1	GCA_001561195.1	5.13089	148	0	0	0.8026
Escherichia coli	Ec-HUCA 4	B2	B2-1	GCA_002855715.1	5.35423	78	0	0	0.81508
Escherichia coli	TUM17750	B2	B2-1	GCA_003203415.1	5.47665	696	0	0	0.79879
Escherichia coli	CMY-33	B2	B2-1	GCA_003076735.1	5.19962	70	0	0	0.82039
Escherichia coli	EC-32	B2	B2-1	GCA_003076695.1	5.19989	82	0	0	0.81259
Escherichia coli	EC-16	B2	B2-1	GCA_003076715.1	5.1924	76	0	0	0.81863
Escherichia coli	EC-4	B2	B2-1	GCA_003076675.1	5.19734	73	0	0	0.81627
Escherichia coli	EC-1	B2	B2-1	GCA_003122025.1	5.19763	71	0	0	0.8206
Escherichia coli	GN05843	B2	B2-1	GCA_001621765.1	5.24873	155	0	0	0.80704
Escherichia coli	B132	B2	B2-1	GCA_001561705.1	5.12475	95	0	0	0.80952
Escherichia coli	GN02448	B2	B2-1	GCA_001521055.2	5.41633	4	1	0	0.81847
Escherichia coli	J21	B2	B2-1	GCA_001637985.1	5.16392	165	0	0	0.81362
Escherichia coli	LS4	B2	B2-1	GCA_002764015.1	5.3139	3	1	0	0.8126
Escherichia coli	NQ3	B2	B2-1	GCA_002763995.1	5.3139	3	1	0	0.81279
Escherichia coli	TUM17749	B2	B2-1	GCA_003203395.1	5.26791	125	1	0	0.81279
Escherichia coli	1351	B2	B2-1	GCA_001647405.1	5.02397	72	0	0	0.80714
Escherichia coli	B51	B2	B2-1	GCA_001561445.1	5.02764	78	0	0	0.80103
Escherichia coli	U5	B2	B2-1	GCA_001638055.1	5.279	193	0	0	0.81609
Escherichia coli	GN02449	B2	B2-1	GCA_001520395.1	5.20871	222	0	0	0.80535
Escherichia coli HVH 202 (4-3163997)	HVH 202 (4-3163997)	B2	B2-1	GCA_000459095.1	5.34804	10	0	0	0.81768
Escherichia coli	CR48	B2	B2-1	GCA_001182805.1	5.18569	63	0	0	0.81103
Escherichia coli	GN02545	B2	B2-1	GCA_001520695.2	5.22678	2	0	0	0.8121
Escherichia coli	151-1921	B2	B2-1	GCA_002244785.1	5.30334	12	0	0	0.81632
Escherichia coli	ZH063	B2	B2-1	GCA_001577325.1	5.19705	3	0	0	0.81534
Escherichia coli HVH 90 (4-3191362)	HVH 90 (4-3191362)	B2	B2-1	GCA_000457285.1	5.179	5	0	0	0.82156
Escherichia coli	B54	B2	B2-1	GCA_001561455.1	5.15672	124	0	0	0.82033
Escherichia coli	U12	B2	B2-1	GCA_001637965.1	5.10119	73	0	0	0.81192
Escherichia coli HVH 154 (4-5636698)	HVH 154 (4-5636698)	B2	B2-1	GCA_000458295.1	5.33657	49	0	0	0.81276
Escherichia coli	B44	B2	B2-1	GCA_001561375.1	5.21017	100	0	0	0.8258
Escherichia coli KTE6	KTE6	B2	B2-1	GCA_000352065.1	5.21337	4	0	0	0.81116
Escherichia coli	11.1-R1	B2	B2-1	GCA_002001525.1	5.1375	89	0	0	0.81352
Escherichia coli	SaT040	B2	B2-1	GCA_001566615.1	5.17604	2	0	0	0.81666
Escherichia coli	1366	B2	B2-1	GCA_001561045.1	5.13315	105	0	0	0.80924
Escherichia coli	B3	B2	B2-1	GCA_001561135.1	5.13563	93	0	0	0.80337
Escherichia coli	MB1074	B2	B2-1	GCA_001637845.1	5.34758	206	0	0	0.82158
Escherichia coli	GN04124	B2	B2-1	GCA_001521375.1	5.20063	304	0	0	0.81705
Escherichia coli	G199	B2	B2-1	GCA_002120205.1	5.27791	5	0	0	0.81892
Escherichia coli	B71	B2	B2-1	GCA_001561555.1	5.18333	142	0	0	0.81106
Escherichia coli	B26	B2	B2-1	GCA_001561335.1	5.1482	180	0	0	0.80538
Escherichia coli	GN05829	B2	B2-1	GCA_001621745.1	5.06268	215	0	0	0.81304
Escherichia coli	MOD1-EC671	B2	B2-1	GCA_002456695.1	5.36363	259	1	0	0.81332
Escherichia coli	upec-54	B2	B2-1	GCA_000776925.1	5.14279	127	1	0	0.82234
Escherichia coli 2-316-03_S4_C3	2-316-03_S4_C3	B2	B2-1	GCA_000704345.1	5.42764	155	1	0	0.81866
Escherichia coli 3-020-07_S4_C1	3-020-07_S4_C1	B2	B2-1	GCA_000711555.1	5.69137	128	1	0	0.81874
Escherichia coli	482_SBOY	B2	B2-1	GCA_001065165.1	5.08311	245	0	0	0.8055
Escherichia coli	60_SBOY	B2	B2-1	GCA_001063835.1	5.18834	218	0	0	0.8121
Escherichia coli	456_ECOL	B2	B2-1	GCA_001056875.1	5.13503	176	0	0	0.81435
Escherichia coli	Ecol_448	B2	B2-1	GCA_001618365.1	5.2123	3	0	0	0.81782
Escherichia coli	B37	B2	B2-1	GCA_001561295.1	5.13064	196	0	0	0.81785
Escherichia coli	ECPUTH09	B2	B2-1	GCA_002249065.1	5.02926	122	0	0	0.80509
Escherichia coli	Ec-HUCA 1	B2	B2-1	GCA_002855675.1	5.16686	101	0	0	0.80922
Escherichia coli KTE162	KTE162	B2	B2-1	GCA_000352005.1	5.00889	10	0	0	0.81279
Escherichia coli	486_ECOL	B2	B2-1	GCA_001056965.1	4.90633	160	0	0	0.80245
Escherichia coli	B22	B2	B2-1	GCA_001561355.1	4.96439	183	0	0	0.81471
Escherichia coli	Win2012_WWKa_OUT_8	B2	B2-1	GCA_003144925.1	5.01699	161	0	0	0.81061
Escherichia coli	GN03204	B2	B2-1	GCA_001520915.1	4.97395	267	0	0	0.81138
Escherichia coli	ECPUTH04	B2	B2-1	GCA_002248265.1	5.13004	131	0	0	0.81578
Escherichia coli	GN05121	B2	B2-1	GCA_001621355.1	5.02775	213	0	0	0.81449
Escherichia coli	GN05712	B2	B2-1	GCA_001521555.1	5.13052	386	0	0	0.80729
Escherichia coli 907446	907446	B2	B2-1	GCA_000488335.1	5.04912	158	0	0	0.813
Escherichia coli	DA33135	B2	B2-1	GCA_003181035.1	5.25309	3	0	0	0.80622
Escherichia coli	TUM3434	B2	B2-1	GCA_003176455.1	5.10638	139	0	0	0.81322
Escherichia coli	upec-271	B2	B2-1	GCA_000777695.1	5.07369	86	0	0	0.81514
Escherichia coli	233	B2	B2-1	GCA_002917565.1	5.59444	1169	0	0	0.82941
Escherichia coli	32b_Esco_HA-NL	B2	B2-1	GCA_002442165.1	5.07826	189	0	0	0.808
Escherichia coli	Eco889	B2	B2-1	GCA_001663475.1	5.31246	3	0	0	0.8188
Escherichia coli	upec-88	B2	B2-1	GCA_000776535.1	5.20435	128	0	0	0.81414
Escherichia coli KTE216	KTE216	B2	B2-1	GCA_000351225.1	5.30989	16	0	0	0.81535
Escherichia coli	GN04075	B2	B2-1	GCA_001521595.1	5.181	257	0	0	0.82031
Escherichia coli KTE148	KTE148	B2	B2-1	GCA_000326365.1	5.09991	144	0	0	0.8136
Escherichia coli KTE173	KTE173	B2	B2-1	GCA_000352845.1	5.22233	5	0	0	0.81912
Escherichia coli KTE175	KTE175	B2	B2-1	GCA_000352865.1	5.24726	6	0	0	0.81933
Escherichia coli	12.2p	B2	B2-1	GCA_002166005.1	4.98423	672	0	0	0.81029
Escherichia coli	12.4r	B2	B2-1	GCA_002165995.1	4.99311	266	0	0	0.81406
Escherichia coli	12.1a	B2	B2-1	GCA_002165955.1	4.99095	219	0	0	0.8124
Escherichia coli	12.3r	B2	B2-1	GCA_002166035.1	4.99175	231	0	0	0.8128
Escherichia coli	SN5	B2	B2-1	GCA_001182885.1	5.21603	87	0	0	0.80397
Escherichia coli	J09	B2	B2-1	GCA_001637895.1	4.85216	118	0	0	0.81521
Escherichia coli	Ecol_745	B2	B2-1	GCA_001618345.2	5.04091	2	0	0	0.80522
Escherichia coli	39913	B2	B2-1	GCA_002180815.1	4.9005	112	0	0	0.80344
Escherichia coli	upec-134	B2	B2-1	GCA_000780815.1	4.99381	92	0	0	0.81181
Escherichia coli	U80	B2	B2-1	GCA_001638075.1	4.94312	179	0	0	0.81788
Escherichia coli	CoR-19	B2	B2-1	GCA_002223935.1	4.95813	92	0	0	0.80509
Escherichia coli	Ecol_743	B2	B2-1	GCA_001618325.1	5.14009	5	0	0	0.81909
Escherichia coli KTE139	KTE139	B2	B2-1	GCA_000326345.1	4.88431	108	0	0	0.81315
Escherichia coli KTE211	KTE211	B2	B2-1	GCA_000353045.1	5.00271	9	0	0	0.81575
Escherichia coli	EcSTB_718_S	B2	B2-1	GCA_003225915.1	4.87729	25	0	0	0.80971
Escherichia coli	EcSTB_718_R	B2	B2-1	GCA_003226185.1	4.9509	21	0	0	0.80841
Escherichia coli	EcN107	B2	B2-1	GCA_003226175.1	4.95431	21	0	0	0.812
Escherichia coli	YD762	B2	B2-1	GCA_002886445.1	4.91114	124	0	0	0.81487
Escherichia coli	upec-29	B2	B2-1	GCA_000777395.1	4.80691	231	0	0	0.80671
Escherichia coli SE15	SE15	B2	B2-1	GCA_000010485.1	4.83968	2	0	0	0.80843
Escherichia coli	MOD1-EC321	B2	B2-2	GCA_002466345.1	5.09501	247	0	0	0.79592
Escherichia coli 2362-75	2362-75	B2	B2-2	GCA_000183005.1	5.17344	83	0	0	0.80797
Escherichia coli DEC1C	DEC1C	B2	B2-2	GCA_000249095.1	5.27707	81	0	0	0.81929
Escherichia coli	MOD1-EC917	B2	B2-2	GCA_002464965.1	4.96385	283	0	0	0.79718
Escherichia coli DEC1E	DEC1E	B2	B2-2	GCA_000249135.1	5.15392	50	0	0	0.81271
Escherichia coli DEC2D	DEC2D	B2	B2-2	GCA_000249215.1	5.09472	45	0	0	0.8143
Escherichia coli DEC1A	DEC1A	B2	B2-2	GCA_000249055.1	5.10872	63	0	0	0.81115
Escherichia coli DEC2B	DEC2B	B2	B2-2	GCA_000249175.1	5.13445	54	0	0	0.81581
Escherichia coli	400929	B2	B2-2	GCA_001266335.1	5.03784	139	0	0	0.82095
Escherichia coli	S6995	B2	B2-2	GCA_000691085.1	5.21142	134	0	0	0.80676
Escherichia coli	303289	B2	B2-2	GCA_001267345.1	5.09136	140	0	0	0.80037
Escherichia coli	302048	B2	B2-2	GCA_001265355.1	5.27051	436	0	0	0.81909
Escherichia coli	MOD1-EC1404	B2	B2-2	GCA_002461505.1	5.13698	250	0	0	0.81018
Escherichia coli	102598	B2	B2-2	GCA_001265675.1	5.36297	187	0	0	0.81353
Escherichia coli	103414	B2	B2-2	GCA_002075235.1	5.23458	128	0	0	0.80826
Escherichia coli	100290	B2	B2-2	GCA_001265165.1	5.42408	115	0	0	0.81772
Escherichia coli	MOD1-EC1392	B2	B2-2	GCA_002461645.1	5.01938	275	0	0	0.80187
Escherichia coli	403116	B2	B2-2	GCA_001267335.1	4.97595	106	0	0	0.81177
Escherichia coli	401195	B2	B2-2	GCA_001266355.1	4.88706	194	0	0	0.80032
Escherichia coli	401031	B2	B2-2	GCA_001265415.1	5.03698	170	0	0	0.8043
Escherichia coli O127:H6 str. E2348/69	E2348/69	B2	B2-2	GCA_000026545.1	5.06968	3	0	0	0.80769
Escherichia coli	MOD1-EC322	B2	B2-2	GCA_002466305.1	4.95268	187	0	0	0.80343
Escherichia coli O127:H6 str. E2348/69 substr. CVDNalr	E2348/69 substr. CVDNalr	B2	B2-2	GCA_000442065.2	4.94084	127	0	0	0.81055
Escherichia coli O127:H6 str. E2348/69 substr. UMD753	E2348/69 substr. UMD753	B2	B2-2	GCA_000442085.2	4.94114	130	0	0	0.7957
Escherichia coli DEC1D	DEC1D	B2	B2-2	GCA_000249115.1	5.15941	66	0	0	0.80688
Escherichia coli O127:H6	EPEC1	B2	B2-2	GCA_900149875.1	4.79249	1	0	0	0.79578
Escherichia coli O127:H6	EPEC E2348/69 variety 2	B2	B2-2	GCA_900149915.1	4.84862	1	0	0	0.80234
Escherichia coli	403128	B2	B2-2	GCA_001283825.1	4.9151	145	0	0	0.80167
Escherichia coli	102535	B2	B2-2	GCA_001266115.1	4.78544	97	0	0	0.8076
Escherichia coli	401264	B2	B2-2	GCA_001265515.1	5.14392	228	0	0	0.79715
Escherichia coli 103385	103385	B2	B2-2	GCA_001265235.1	5.05277	149	0	0	0.80488
Escherichia coli	402310	B2	B2-2	GCA_001265975.1	5.10936	94	0	0	0.80657
Escherichia coli	401817	B2	B2-2	GCA_001265935.1	4.8992	96	0	0	0.79563
Escherichia coli	MOD1-EC1702	B2	B2-2	GCA_002459605.1	5.1264	248	0	0	0.79941
Escherichia coli	102713	B2	B2-2	GCA_002075265.1	5.25784	201	0	0	0.79725
Escherichia coli	S7438	B2	B2-2	GCA_000690945.1	5.1297	146	0	0	0.79178
Escherichia coli	S6966	B2	B2-2	GCA_000691065.1	5.21848	117	0	0	0.79704
Escherichia coli	401588	B2	B2-2	GCA_001265925.1	5.10291	100	0	0	0.80233
Escherichia coli 300059	300059	B2	B2-2	GCA_001265295.1	4.83188	122	0	0	0.79914
Escherichia coli	300214	B2	B2-2	GCA_001265765.1	5.06653	104	0	0	0.79913
Escherichia coli	300262	B2	B2-2	GCA_001265315.1	4.97415	111	0	0	0.80554
Escherichia coli	302275	B2	B2-2	GCA_001265395.1	5.00971	394	0	0	0.80411
Escherichia coli C844_97	C844_97	B2	B2-2	GCA_000410675.2	4.66411	116	0	0	0.79422
Escherichia coli 3003	3003	B2	B2-2	GCA_000194665.1	4.91733	8	0	0	0.79315
Escherichia coli	MOD1-EC581	B2	B2-2	GCA_002466085.1	4.83111	157	0	0	0.78732
Escherichia coli C639_08	C639_08	B2	B2-2	GCA_000410655.2	4.91352	148	0	0	0.79316
Escherichia coli RN587/1	RN587/1	B2	B2-2	GCA_000188875.1	5.06158	73	0	0	0.78972
Escherichia coli ARS4.2123	ARS4.2123	B2	B2-2	GCA_000304095.2	4.9773	208	0	0	0.80137
Escherichia coli C9_92	C9_92	B2	B2-2	GCA_000447125.2	4.71365	93	0	0	0.79888
Escherichia coli	700283	B2	B2-2	GCA_001266445.1	4.75705	97	0	0	0.79814
Escherichia coli	MOD1-EC1544	B2	B2-2	GCA_002461255.1	4.8098	252	0	0	0.78828
Escherichia coli	MOD1-EC1696	B2	B2-2	GCA_002460435.1	5.1833	264	0	0	0.80609
Escherichia coli O86:H34 str. 99-3124	99-3124	B2	B2-2	GCA_000614465.2	4.89085	181	0	0	0.8014
Escherichia coli	402559	B2	B2-2	GCA_001266385.1	4.9864	288	0	0	0.78949
Escherichia coli	MOD1-EC5075	B2	B2-2	GCA_002474445.1	5.04612	275	0	0	0.807
Escherichia coli	MOD1-EC1553	B2	B2-2	GCA_002461115.1	4.83019	225	0	0	0.80055
Escherichia coli	302909	B2	B2-2	GCA_001265845.1	4.7929	254	0	0	0.78082
Escherichia coli	401675	B2	B2-2	GCA_001266375.1	4.9546	125	0	0	0.81164
Escherichia coli	MOD1-EC1564	B2	B2-2	GCA_002460965.1	4.9411	283	0	0	0.79848
Escherichia coli	200077	B2	B2-2	GCA_001266175.1	5.08589	141	0	0	0.80812
Escherichia coli	MOD1-EC1699	B2	B2-2	GCA_002509785.1	4.95232	144	0	0	0.79018
Escherichia coli	MOD1-EC1545	B2	B2-2	GCA_002461225.1	4.98595	157	0	0	0.80791
Escherichia coli	MOD1-EC1542	B2	B2-2	GCA_002461965.1	4.89562	170	0	0	0.81015
Escherichia coli	702324	B2	B2-2	GCA_001265575.1	5.00865	96	0	0	0.80066
Escherichia coli	102667	B2	B2-2	GCA_002075165.1	5.00847	227	0	0	0.78485
Escherichia coli C796_10	C796_10	B2	B2-2	GCA_000446905.2	4.6211	120	0	0	0.77963
Escherichia coli	200135_aEPEC	B2	B2-2	GCA_001285145.1	4.88744	140	0	0	0.79657
Escherichia coli	MOD1-EC1711	B2	B2-2	GCA_002459475.1	4.86852	226	0	0	0.80502
Escherichia coli	303145	B2	B2-2	GCA_001265875.1	4.84032	102	0	0	0.79918
Escherichia coli	300847	B2	B2-2	GCA_001266215.1	4.85164	385	0	0	0.78336
Escherichia coli 302053	302053	B2	B2-2	GCA_001265345.1	4.94106	420	0	0	0.80668
Escherichia coli	300075	B2	B2-2	GCA_001265755.1	4.96829	103	0	0	0.80816
Escherichia coli	MOD1-EC1548	B2	B2-2	GCA_002461185.1	5.21936	290	0	0	0.80389
Escherichia coli	203741	B2	B2-2	GCA_001265265.1	5.05435	446	0	0	0.7872
Escherichia coli	102536	B2	B2-2	GCA_001265655.1	5.29865	134	0	0	0.81688
Escherichia coli	102556	B2	B2-2	GCA_002075175.1	5.18276	259	0	0	0.79457
Escherichia coli	S6400	B2	B2-2	GCA_000690965.1	5.00874	130	0	0	0.808
Escherichia coli	400738	B2	B2-2	GCA_001265885.1	5.15843	102	0	0	0.80801
Escherichia coli	402981	B2	B2-2	GCA_001266405.1	5.17083	75	0	0	0.82155
Escherichia coli C581_05	C581_05	B2	B2-2	GCA_000446645.2	5.17416	353	0	0	0.81505
Escherichia coli	300231	B2	B2-2	GCA_001265795.1	5.1258	79	0	0	0.81842
Escherichia coli	300757	B2	B2-2	GCA_002075135.1	5.0585	105	0	0	0.80829
Escherichia coli C586_05	C586_05	B2	B2-2	GCA_000446685.2	5.03302	210	0	0	0.80839
Escherichia coli	302150	B2	B2-2	GCA_001265815.1	4.94326	286	0	0	0.80321
Escherichia coli	MOD1-EC1700	B2	B2-2	GCA_002459615.1	5.1835	322	0	0	0.80517
Escherichia coli	MOD1-EC1393	B2	B2-2	GCA_002461635.1	5.117	307	0	0	0.81012
Escherichia coli	G702074-2	B2	B2-2	GCA_001284285.1	5.4151	121	0	0	0.8163
Escherichia coli	702898_aEPEC	B2	B2-2	GCA_001283845.1	5.27069	120	0	0	0.81719
Escherichia coli	703063	B2	B2-2	GCA_001284625.1	5.27763	114	0	0	0.81329
Escherichia coli	MOD1-EC5281	B2	B2-2	GCA_002517325.1	5.2067	268	0	0	0.80865
Escherichia coli	100414	B2	B2-2	GCA_001265155.1	5.30685	116	0	0	0.81021
Escherichia coli	401596_aEPEC	B2	B2-2	GCA_001277715.1	5.19682	159	0	0	0.81586
Escherichia coli	401709_aEPEC	B2	B2-2	GCA_001284745.1	5.20469	130	0	0	0.81916
Escherichia coli	402767	B2	B2-2	GCA_001285705.1	5.22657	138	0	0	0.80494
Escherichia coli	402480_aEPEC	B2	B2-2	GCA_001286005.1	5.23642	153	0	0	0.80784
Escherichia coli	G303212	B2	B2-2	GCA_001286705.1	5.18373	282	0	0	0.81876
Escherichia coli	505148	B2	B2-2	GCA_001285645.1	5.09828	84	0	0	0.81412
Escherichia coli	upec-202	B2	B2-2	GCA_000779295.1	4.79434	58	0	0	0.79213
Escherichia coli C79_08	C79_08	B2	B2-2	GCA_000446865.2	4.78738	406	0	0	0.80722
Escherichia coli	MOD1-EC6374	B2	B2-2	GCA_002513875.1	4.79475	157	0	0	0.80462
Escherichia coli	PA58	B2	B2-2	GCA_002797055.1	4.9024	149	0	0	0.81005
Escherichia coli	155388	B2	B2-2	GCA_001286565.1	4.73552	30	0	0	0.80994
Escherichia coli	CA14	B2	B2-2	GCA_002797075.1	4.93639	173	0	0	0.79994
Escherichia coli	703108	B2	B2-2	GCA_001286485.1	4.78341	44	0	0	0.79539
Escherichia coli	200499	B2	B2-2	GCA_001286605.1	4.79112	49	0	0	0.79795
Escherichia coli	MOD1-EC6509	B2	B2-2	GCA_002510595.1	4.77969	72	0	0	0.79012
Escherichia coli	302137	B2	B2-2	GCA_001266225.1	5.1013	44	0	0	0.80191
Escherichia coli	HT2012EP01	B2	B2-2	GCA_002971035.1	5.03487	64	0	0	0.80874
Escherichia coli	504225_aEPEC	B2	B2-2	GCA_001284725.1	4.7967	57	0	0	0.80391
Escherichia coli	HT2012EP05	B2	B2-2	GCA_002971005.1	4.9372	49	0	0	0.81302
Escherichia coli	STEC 1303	B2	B2-2	GCA_001606835.1	5.08821	63	0	0	0.80995
Escherichia coli	M859	B2	B2-2	GCA_900016005.1	4.90416	42	0	0	0.81257
Escherichia coli	STEC 1473	B2	B2-2	GCA_001606475.1	5.03841	84	0	0	0.81049
Escherichia coli C887_10	C887_10	B2	B2-2	GCA_000447065.2	4.99514	193	0	0	0.80844
Escherichia coli	STEC 1178	B2	B2-2	GCA_001606855.1	5.01006	75	0	0	0.80312
Escherichia coli	STEC 1270	B2	B2-2	GCA_001606555.1	5.02105	62	0	0	0.79961
Escherichia coli	M884	B2	B2-2	GCA_900016365.1	5.07222	68	0	0	0.80519
Escherichia coli	HT2012EP13	B2	B2-2	GCA_002971135.1	5.00344	90	0	0	0.80036
Escherichia coli	MOD1-EC898	B2	B2-2	GCA_002465055.1	5.15971	242	0	0	0.81249
Escherichia coli C2139_99	C2139_99	B2	B2-2	GCA_000446285.2	4.83642	152	0	0	0.80641
Escherichia coli	100600_aEPEC	B2	B2-2	GCA_001286465.1	4.78794	28	0	0	0.80783
Escherichia coli	MOD1-EC5939	B2	B2-2	GCA_002544725.1	4.75812	76	0	0	0.80154
Escherichia coli	FHI_NMBU_03	B2	B2-2	GCA_002951855.1	4.84488	2	0	0	0.80878
Escherichia coli	MOD1-EC6364	B2	B2-2	GCA_002512495.1	5.02567	296	0	0	0.80499
Escherichia coli	MOD1-EC6713	B2	B2-2	GCA_002522445.1	5.0696	198	0	0	0.80479
Escherichia coli	MOD1-EC6366	B2	B2-2	GCA_002513955.1	5.12901	344	0	0	0.79999
Escherichia coli	HT2012EP10	B2	B2-2	GCA_002971215.1	5.09117	84	0	0	0.81694
Escherichia coli	HT2012EP11	B2	B2-2	GCA_002971255.1	5.09631	86	0	0	0.80371
Escherichia coli	HT2012077	B2	B2-2	GCA_002971795.1	5.06733	87	0	0	0.8087
Escherichia coli	HT2012085	B2	B2-2	GCA_002971835.1	5.06699	80	0	0	0.80481
Escherichia coli 07798	07798	B2	B2-2	GCA_000303655.2	4.90437	224	0	0	0.80307
Escherichia coli	EPEC 1554	B2	B2-2	GCA_001742645.1	4.90331	145	0	0	0.80466
Escherichia coli C93_11	C93_11	B2	B2-2	GCA_000447105.2	4.88452	270	0	0	0.80055
Escherichia coli	202521_aEPEC	B2	B2-2	GCA_001283985.1	4.86097	74	0	0	0.80251
Escherichia coli	EPEC 2252	B2	B2-2	GCA_001742655.1	4.87189	105	0	0	0.80688
Escherichia coli	EPEC 1150	B2	B2-2	GCA_001742625.1	4.86472	97	0	0	0.80184
Escherichia coli	EPEC 2272	B2	B2-2	GCA_001742665.1	4.86341	109	0	0	0.79693
Escherichia coli 3-073-06_S1_C1	3-073-06_S1_C1	B2	B2-2	GCA_000704845.1	4.94539	82	0	0	0.79858
Escherichia coli	401480_aEPEC	B2	B2-2	GCA_001286665.1	4.88206	79	0	0	0.80322
Escherichia coli	MOD1-EC1568	B2	B2-2	GCA_002460945.1	4.95506	314	0	0	0.79913
Escherichia coli	MOD1-EC1537	B2	B2-2	GCA_002461335.1	4.87188	267	0	0	0.80311
Escherichia coli	MOD1-EC1558	B2	B2-2	GCA_002461055.1	5.10862	196	0	0	0.79835
Escherichia coli	MOD1-EC1551	B2	B2-2	GCA_002461885.1	4.79212	177	0	0	0.79932
Escherichia coli	MOD1-EC1559	B2	B2-2	GCA_002461025.1	4.78687	166	0	0	0.79564
Escherichia coli	ECCTRSRTH06	B2	B2-2	GCA_002247965.2	5.06256	35	0	0	0.80747
Escherichia coli	FHI74	B2	B2-2	GCA_000937135.2	4.92756	27	0	0	0.80687
Escherichia coli	HT2012EP08	B2	B2-2	GCA_002971095.1	4.83707	67	0	0	0.80514
Escherichia coli	HT2012EP03	B2	B2-2	GCA_002971175.1	4.76917	79	0	0	0.80117
Escherichia coli C295_10	C295_10	B2	B2-2	GCA_000446385.2	4.66447	128	0	0	0.79373
Escherichia coli	MOD1-EC2820	B2	B2-2	GCA_002516165.1	4.69468	81	0	0	0.78354
Escherichia coli KTE84	KTE84	B2	B2-2	GCA_000352465.1	4.6178	3	0	0	0.79649
Escherichia coli TW07793	TW07793	B2	B2-2	GCA_000194685.1	4.64392	8	0	0	0.80034
Escherichia coli C262_10	C262_10	B2	B2-2	GCA_000446345.2	4.72172	186	0	0	0.79939
Escherichia coli	MOD1-EC1569	B2	B2-2	GCA_002460895.1	4.84765	103	0	0	0.79364
Escherichia coli	401363	B2	B2-2	GCA_001283865.2	4.67935	88	0	0	0.79833
Escherichia coli	401352	B2	B2-2	GCA_001284385.1	4.81156	96	0	0	0.79063
Escherichia coli	102549	B2	B2-2	GCA_002075205.1	4.77397	93	0	0	0.80534
Escherichia coli	302312	B2	B2-2	GCA_001266255.1	5.15033	115	0	0	0.8056
Escherichia coli	303301	B2	B2-2	GCA_001266305.1	4.91183	100	0	0	0.80536
Escherichia coli 6-175-07_S1_C1	6-175-07_S1_C1	B2	B2-2	GCA_000714185.1	4.97699	102	0	0	0.80439
Escherichia coli	402048_aEPEC	B2	B2-2	GCA_001285825.1	5.02206	106	0	0	0.79503
Escherichia coli	401938_aEPEC	B2	B2-2	GCA_001277775.1	5.01402	128	0	0	0.79775
Escherichia coli	BCW_5717	B2	B2-2	GCA_003173235.1	5.05884	235	0	0	0.80766
Escherichia coli	M858	B2	B2-2	GCA_900015995.1	5.12558	90	0	0	0.79921
Escherichia coli	M856	B2	B2-2	GCA_900015985.1	5.18442	135	0	0	0.80215
Escherichia coli	BCW5717	B2	B2-2	GCA_900016055.1	5.04812	447	0	0	0.79424
Escherichia coli	STEC 2334	B2	B2-2	GCA_001607225.1	4.93042	156	0	0	0.79705
Escherichia coli	STEC 940	B2	B2-2	GCA_001607045.1	5.01293	116	0	0	0.80593
Escherichia coli	STEC 1198	B2	B2-2	GCA_001608235.1	4.93256	75	0	0	0.8006
Escherichia coli	BCW5739	B2	B2-2	GCA_900016025.1	4.92756	322	0	0	0.80431
Escherichia coli	STEC 793	B2	B2-2	GCA_001606705.1	4.97121	105	0	0	0.81344
Escherichia coli	BCW5743	B2	B2-2	GCA_900016045.1	4.96755	406	0	0	0.79883
Escherichia coli	STEC 2539	B2	B2-2	GCA_001607525.1	4.95447	110	0	0	0.81259
Escherichia coli	BCW5746	B2	B2-2	GCA_900016015.1	4.95867	315	0	0	0.79427
Escherichia coli	OLC2140	B2	B2-2	GCA_002134155.1	4.80748	114	0	0	0.8004
Escherichia coli C418_89	C418_89	B2	B2-2	GCA_000446525.2	4.67136	146	0	0	0.79429
Escherichia coli	MOD1-EC1689	B2	B2-2	GCA_002459695.1	4.65977	99	0	0	0.79519
Escherichia coli	HT2012EP12	B2	B2-2	GCA_002971235.1	4.67957	57	0	0	0.79895
Escherichia coli	HT2012155	B2	B2-2	GCA_002973335.1	4.67533	88	0	0	0.79517
Escherichia coli	MOD1-EC6889	B2	B2-2	GCA_002519905.1	4.70847	56	0	0	0.78719
Escherichia coli C58_11	C58_11	B2	B2-2	GCA_000446665.2	4.68759	65	0	0	0.79777
Escherichia coli	OLC985	B2	B2-2	GCA_002133935.1	4.93875	98	0	0	0.80336
Escherichia coli	2015C-4136CT1	B2	B2-2	GCA_003018475.1	4.99973	2	0	0	0.81148
Escherichia coli	RM14723	B2	B2-2	GCA_003043915.1	4.75403	1	0	0	0.79986
Escherichia coli WV_060327	WV_060327	B2	B2-2	GCA_000193975.1	4.6815	28	0	0	0.80832
Escherichia coli	M885	B2	B2-2	GCA_900007725.1	4.8349	74	0	0	0.79661
Escherichia coli C78_09C	C78_09C	B2	B2-2	GCA_000446845.2	4.69176	190	0	0	0.7866
Escherichia coli UMEA 3152-1	UMEA 3152-1	B2	B2-2	GCA_000460375.1	4.76401	19	0	0	0.80558
Escherichia coli	M900	B2	B2-2	GCA_900007735.1	4.79902	55	0	0	0.79508
Escherichia coli	OLC1258	B2	B2-2	GCA_002134725.1	4.77612	63	0	0	0.79797
Escherichia coli	UM141	B2	B2-2	GCA_001571565.1	5.05168	54	18	1	0.81788
Escherichia coli	MOD1-EC5197	B2	B2-2	GCA_002517085.1	4.97694	62	19	1	0.80642
Escherichia coli	upec-76	B2	B2-2	GCA_000776235.1	5.03974	62	18	1	0.81196
Escherichia coli NU14	NU14	B2	B2-2	GCA_002024865.1	5.07662	1	19	1	0.81743
Escherichia coli APEC O18	APEC O18	B2	B2-2	GCA_001021615.1	5.00657	1	19	1	0.80923
Escherichia coli	SP-4	B2	B2-2	GCA_002879805.2	4.8947	50	19	1	0.80542
Escherichia coli	Spr2013_WWKa_NEU_37	B2	B2-2	GCA_003145875.1	5.00758	175	18	1	0.80511
Escherichia coli IHE3034	IHE3034	B2	B2-2	GCA_000025745.1	5.10838	1	19	1	0.81002
Escherichia coli	NMEC O18	B2	B2-2	GCA_001021595.1	5.00278	1	18	1	0.8071
Escherichia coli	SCB12	B2	B2-2	GCA_000817355.1	5.4783	96	18	1	0.82597
Escherichia coli H413	H413	B2	B2-2	GCA_002109685.1	5.12866	35	17	1	0.81739
Escherichia coli	LSPQ A134697	B2	B2-2	GCA_001262455.1	5.22878	81	19	1	0.81241
Escherichia coli KTE55	KTE55	B2	B2-2	GCA_000351505.1	5.22051	11	18	1	0.82003
Escherichia coli	MOD1-EC1389	B2	B2-2	GCA_002461695.1	5.1535	131	19	1	0.81052
Escherichia coli RS218	RS218	B2	B2-2	GCA_000817345.1	5.17308	67	18	1	0.81954
Escherichia coli	blood-10-0686	B2	B2-2	GCA_000781575.1	5.17791	61	18	1	0.80909
Escherichia coli	blood-10-0687	B2	B2-2	GCA_000781555.1	5.18607	65	18	1	0.81751
Escherichia coli UM146	UM146	B2	B2-2	GCA_000148605.1	5.10756	2	15	1	0.81473
Escherichia coli	upec-169	B2	B2-2	GCA_000780095.1	5.25849	73	18	1	0.81769
Escherichia coli	34.2r	B2	B2-2	GCA_002166405.1	5.14461	151	18	1	0.82332
Escherichia coli	34.1a	B2	B2-2	GCA_002166345.1	5.14595	145	18	1	0.82251
Escherichia coli	SF-173	B2	B2-2	GCA_001280405.1	5.15281	2	19	1	0.81264
Escherichia coli	USVAST356	B2	B2-2	GCA_001881465.1	5.17653	59	18	1	0.81452
Escherichia coli	USVAST406	B2	B2-2	GCA_001881205.1	5.21097	34	18	1	0.81764
Escherichia coli	SF-001	B2	B2-2	GCA_002028665.1	5.30295	41	18	1	0.80961
Escherichia coli	blood-09-0751	B2	B2-2	GCA_000782055.1	5.51737	182	19	1	0.8202
Escherichia coli	upec-120	B2	B2-2	GCA_000781095.1	5.3281	125	11	1	0.81174
Escherichia coli	MOD1-EC5349	B2	B2-2	GCA_002517335.1	5.28217	155	19	1	0.81752
Escherichia coli UMEA 3834-1	UMEA 3834-1	B2	B2-2	GCA_000461735.1	5.37562	15	19	1	0.82535
Escherichia coli	OS_02_035_15	B2	B2-2	GCA_002087735.1	5.37015	9	19	1	0.8225
Escherichia coli	blood-08-0493	B2	B2-2	GCA_000782735.1	5.31629	99	19	1	0.82183
Escherichia coli	blood-08-0654	B2	B2-2	GCA_000782695.1	5.19854	80	19	1	0.81422
Escherichia coli	5.3r	B2	B2-2	GCA_002166625.1	5.14617	149	18	1	0.81947
Escherichia coli UTI89	UTI89	B2	B2-2	GCA_000013265.1	5.17997	2	19	1	0.81893
Escherichia coli	upec-129	B2	B2-2	GCA_000780925.1	5.19789	109	19	1	0.81836
Escherichia coli	228-2998	B2	B2-2	GCA_002244165.1	5.18488	6	18	1	0.8217
Escherichia coli	228-2945	B2	B2-2	GCA_002244125.1	5.19757	8	19	1	0.81979
Escherichia coli UMEA 3298-1	UMEA 3298-1	B2	B2-2	GCA_000461155.1	5.26051	13	19	1	0.82631
Escherichia coli	MOD1-EC721	B2	B2-2	GCA_002465215.1	5.13348	107	19	1	0.81587
Escherichia coli	USVAST245	B2	B2-2	GCA_001881435.1	5.15041	54	17	1	0.81597
Escherichia coli	BIDMC114	B2	B2-2	GCA_001030665.1	5.22222	7	19	1	0.8213
Escherichia coli	GN03409	B2	B2-2	GCA_001520775.2	5.16597	9	19	1	0.82305
Escherichia coli	GN02148	B2	B2-2	GCA_001519755.1	5.18192	113	19	1	0.81736
Escherichia coli	GN02172	B2	B2-2	GCA_001519235.1	5.17947	112	19	1	0.82267
Escherichia coli	GN02260	B2	B2-2	GCA_001519555.1	5.18042	105	19	1	0.81563
Escherichia coli	GN02254	B2	B2-2	GCA_001519735.1	5.16189	109	19	1	0.81632
Escherichia coli	GN02005	B2	B2-2	GCA_001519135.1	5.16797	102	19	1	0.81256
Escherichia coli H305	H305	B2	B2-2	GCA_002109765.1	5.22708	58	17	1	0.8228
Escherichia coli	GN02099	B2	B2-2	GCA_001519715.1	5.12851	97	19	1	0.81892
Escherichia coli HVH 3 (4-7276001)	HVH 3 (4-7276001)	B2	B2-2	GCA_000456045.1	5.4059	18	17	1	0.82678
Escherichia coli	ExPEC XM	B2	B2-2	GCA_002844685.1	5.43362	2	18	1	0.82062
Escherichia coli	4-7	B2	B2-2	GCA_002911435.1	5.27818	179	19	1	0.81482
Escherichia coli	3-13	B2	B2-2	GCA_002909465.1	5.29546	166	19	1	0.82265
Escherichia coli	F-18	B2	B2-2	GCA_001854565.1	5.25108	113	19	1	0.82362
Escherichia coli	MOD1-EC6794	B2	B2-2	GCA_002462915.1	5.16831	122	19	1	0.81605
Escherichia coli	002PP2015	B2	B2-2	GCA_001700045.1	5.15727	95	0	0	0.81155
Escherichia coli	003PP2015	B2	B2-2	GCA_001700015.1	5.16251	99	0	0	0.80886
Escherichia coli	MOD1-EC6288	B2	B2-2	GCA_002514255.1	5.01103	117	0	0	0.8111
Escherichia coli	MOD1-EC5014	B2	B2-2	GCA_002475575.1	5.15533	180	0	0	0.81719
Escherichia coli	E51	B2	B2-2	GCA_001654955.1	5.17886	217	0	0	0.80928
Escherichia coli	017PP2015	B2	B2-2	GCA_001709165.1	5.08041	140	0	0	0.8128
Escherichia coli	MOD1-EC5395	B2	B2-2	GCA_002517525.1	5.1025	181	0	0	0.80816
Escherichia coli APEC IMT5155	APEC IMT5155	B2	B2-2	GCA_000813165.1	5.12606	3	0	0	0.81679
Escherichia coli	UM147	B2	B2-2	GCA_001571755.1	5.24563	74	0	0	0.80766
Escherichia coli	MOD1-EC6834	B2	B2-2	GCA_002520825.1	5.14604	88	19	1	0.81193
Escherichia coli	upec-209	B2	B2-2	GCA_000778465.1	5.33365	88	19	1	0.81391
Escherichia coli UMEA 3632-1	UMEA 3632-1	B2	B2-2	GCA_000461455.1	5.32865	8	19	1	0.83032
Escherichia coli PMV-1	PMV-1	B2	B2-2	GCA_000493595.2	5.21093	4	19	1	0.81344
Escherichia coli HVH 126 (4-6034225)	HVH 126 (4-6034225)	B2	B2-2	GCA_000457835.1	5.59521	19	19	1	0.82732
Escherichia coli	MOD1-EC6853	B2	B2-2	GCA_002520535.1	5.23796	127	19	1	0.81681
Escherichia coli	A351	B2	B2-2	GCA_002911265.1	5.17172	152	19	1	0.82229
Escherichia coli	MOD1-EC5957	B2	B2-2	GCA_002547305.1	5.23375	160	19	1	0.80164
Escherichia coli	20441-1	B2	B2-2	GCA_003027635.1	5.25438	104	19	1	0.802
Escherichia coli	upec-115	B2	B2-2	GCA_000781215.1	5.36801	66	19	1	0.81086
Escherichia coli HVH 42 (4-2100061)	HVH 42 (4-2100061)	B2	B2-2	GCA_000456665.1	5.37081	8	19	1	0.81527
Escherichia coli	ABU 91	B2	B2-2	GCA_002761605.1	5.28533	81	19	1	0.82615
Escherichia coli	SF-194	B2	B2-2	GCA_002028945.1	5.30823	38	18	1	0.81467
Escherichia coli	GN02165	B2	B2-2	GCA_001519285.1	5.2925	191	19	1	0.80914
Escherichia coli	ABU 9	B2	B2-2	GCA_002761595.1	5.21236	106	19	1	0.82485
Escherichia coli R527	R527	B2	B2-2	GCA_002109575.1	5.2275	57	17	1	0.82204
Escherichia coli	Win2012_WWKa_OUT_34	B2	B2-2	GCA_003153995.1	5.10246	185	18	1	0.81286
Escherichia coli H461	H461	B2	B2-2	GCA_002110165.1	5.30495	44	19	1	0.81445
Escherichia coli	MOD1-EC5284	B2	B2-2	GCA_002517265.1	5.2794	252	19	1	0.80371
Escherichia coli	SP-13	B2	B2-2	GCA_002879795.2	5.16128	108	19	1	0.80521
Escherichia coli KTE180	KTE180	B2	B2-2	GCA_000326805.1	5.12548	112	18	1	0.81727
Escherichia coli	Win2012_WWKa_OUT_35	B2	B2-2	GCA_003145015.1	5.05138	189	19	1	0.81601
Escherichia coli HVH 80 (4-2428830)	HVH 80 (4-2428830)	B2	B2-2	GCA_000457145.1	5.18543	14	18	1	0.80089
Escherichia coli	5.2p	B2	B2-2	GCA_002166615.1	5.13947	503	18	1	0.81181
Escherichia coli	A369	B2	B2-2	GCA_002911335.1	5.13549	187	19	1	0.81928
Escherichia coli	A359	B2	B2-2	GCA_002911325.1	5.05817	211	19	1	0.81075
Escherichia coli	MOD1-EC6113	B2	B2-2	GCA_002512925.1	5.08373	151	19	1	0.81877
Escherichia coli	MOD1-EC6049	B2	B2-2	GCA_002541795.1	5.09522	132	18	1	0.82297
Escherichia coli KTE59	KTE59	B2	B2-2	GCA_000352365.1	5.14593	7	19	1	0.82276
Escherichia coli HVH 211 (4-3041891)	HVH 211 (4-3041891)	B2	B2-2	GCA_000459275.1	5.21854	16	19	1	0.82891
Escherichia coli KTE65	KTE65	B2	B2-2	GCA_000352405.1	5.18222	4	19	1	0.82358
Escherichia coli HVH 76 (4-2538717)	HVH 76 (4-2538717)	B2	B2-2	GCA_000457065.1	5.18709	6	18	1	0.82289
Escherichia coli HVH 30 (4-2661829)	HVH 30 (4-2661829)	B2	B2-2	GCA_000456465.1	5.19818	15	19	1	0.82498
Escherichia coli	MOD1-EC5860	B2	B2-2	GCA_002548265.1	5.03314	100	19	1	0.81699
Escherichia coli	upec-73	B2	B2-2	GCA_000776375.1	5.09312	72	19	1	0.81307
Escherichia coli	GN03324	B2	B2-2	GCA_001521575.1	5.06988	112	18	1	0.81969
Escherichia coli	MOD1-EC690	B2	B2-2	GCA_002466865.1	5.06593	85	19	1	0.81969
Escherichia coli HVH 48 (4-2658593)	HVH 48 (4-2658593)	B2	B2-2	GCA_000456765.1	5.14503	6	18	1	0.82564
Escherichia coli	GN02487	B2	B2-2	GCA_001524905.1	5.11375	232	17	1	0.81681
Escherichia coli	MOD1-EC715	B2	B2-2	GCA_002456335.1	5.08332	85	19	1	0.81556
Escherichia coli KTE22	KTE22	B2	B2-2	GCA_000352265.1	5.14179	6	18	1	0.82341
Escherichia coli KTE123	KTE123	B2	B2-2	GCA_000352565.1	5.18039	5	19	1	0.82332
Escherichia coli	USVAST184	B2	B2-2	GCA_001881155.1	5.2282	34	19	1	0.82353
Escherichia coli	MOD1-EC669	B2	B2-2	GCA_002465935.1	5.17288	105	19	1	0.81355
Escherichia coli HVH 1 (4-6876161)	HVH 1 (4-6876161)	B2	B2-2	GCA_000456005.1	5.33225	10	19	1	0.81719
Escherichia coli HVH 137 (4-2124971)	HVH 137 (4-2124971)	B2	B2-2	GCA_000457995.1	5.21731	8	19	1	0.83249
Escherichia coli	GN06168	B2	B2-2	GCA_001622105.1	5.19275	242	17	1	0.81042
Escherichia coli	MOD1-EC696	B2	B2-2	GCA_002465755.1	5.32825	82	18	1	0.81349
Escherichia coli	upec-7	B2	B2-2	GCA_000776175.1	5.14414	190	19	1	0.81572
Escherichia coli H296	H296	B2	B2-2	GCA_002109775.1	5.30194	56	18	1	0.82312
Escherichia coli	25b_Esco_HA-NL	B2	B2-2	GCA_002631405.1	5.24411	458	17	1	0.8173
Escherichia coli	25_Esco_HA-NL	B2	B2-2	GCA_002442025.1	5.26158	109	18	1	0.81384
Escherichia coli	USVAST267	B2	B2-2	GCA_001881165.1	5.28116	76	18	1	0.81133
Escherichia coli	417_ECOL	B2	B2-2	GCA_001056665.1	5.4312	193	19	1	0.81859
Escherichia coli HVH 118 (4-7345399)	HVH 118 (4-7345399)	B2	B2-2	GCA_000457715.1	5.27487	16	19	1	0.82516
Escherichia coli	upec-48	B2	B2-2	GCA_000777025.1	5.26043	92	19	1	0.80562
Escherichia coli	SF-335	B2	B2-2	GCA_002028875.1	5.30449	42	18	1	0.81626
Escherichia coli KTE118	KTE118	B2	B2-2	GCA_000352545.1	5.22722	3	18	1	0.82191
Escherichia coli	3-S1R	B2	B2-2	GCA_002002315.1	5.24679	192	18	1	0.8159
Escherichia coli	14.2-R2	B2	B2-2	GCA_002001745.1	5.24404	188	18	1	0.81755
Escherichia coli	MOD1-EC6651	B2	B2-2	GCA_002484905.1	5.22542	184	19	1	0.81168
Escherichia coli H397	H397	B2	B2-2	GCA_000241975.1	5.2426	39	18	1	0.81171
Escherichia coli	GN02345	B2	B2-2	GCA_001519895.1	5.16972	347	15	1	0.81428
Escherichia coli	MOD1-EC723	B2	B2-2	GCA_002456255.1	5.1449	105	19	1	0.8165
Escherichia coli KTE58	KTE58	B2	B2-2	GCA_000351565.1	5.30047	7	19	1	0.82098
Escherichia coli	UCD-JA38	B2	B2-2	GCA_001306635.1	5.17584	120	18	1	0.82098
Escherichia coli	MOD1-EC6695	B2	B2-2	GCA_002521585.1	4.99702	118	19	1	0.81771
Escherichia coli	SF-518	B2	B2-2	GCA_001881245.1	5.02754	32	18	1	0.8207
Escherichia coli	upec-197	B2	B2-2	GCA_000779425.1	5.02953	51	19	1	0.81904
Escherichia coli	upec-8	B2	B2-2	GCA_000776195.1	4.93683	70	19	1	0.80201
Escherichia coli	upec-124	B2	B2-2	GCA_000781035.1	4.98924	71	19	1	0.7987
Escherichia coli	K56-68	B2	B2-2	GCA_002810185.1	4.87213	37	18	1	0.81038
Escherichia coli	TUM9589	B2	B2-2	GCA_003176575.1	5.05633	88	19	1	0.80452
Escherichia coli	blood-11-0031	B2	B2-2	GCA_000780275.1	5.12907	74	19	1	0.81
Escherichia coli	blood-11-0041	B2	B2-2	GCA_000779495.1	5.03557	233	19	1	0.80997
Escherichia coli	SF-126	B2	B2-2	GCA_001881105.1	5.08913	19	19	1	0.80601
Escherichia coli	3_2_53FAA	B2	B2-2	GCA_000157115.2	5.15345	12	18	1	0.80632
Escherichia coli	GN02609	B2	B2-2	GCA_001524885.1	5.13757	318	17	1	0.82277
Escherichia coli	SF-596	B2	B2-2	GCA_001881345.1	5.29782	51	19	1	0.82332
Escherichia coli	GN04262	B2	B2-2	GCA_001521455.1	5.15802	145	19	1	0.82517
Escherichia coli	YDC595	B2	B2-2	GCA_002887005.1	5.09682	104	19	1	0.81865
Escherichia coli	upec-98	B2	B2-2	GCA_000776315.1	5.18886	65	19	1	0.81689
Escherichia coli	upec-236	B2	B2-2	GCA_000778355.1	5.14926	70	19	1	0.81942
Escherichia coli	SF-403	B2	B2-2	GCA_002029025.1	5.14307	29	19	1	0.82364
Escherichia coli	SF-440	B2	B2-2	GCA_002029165.1	5.14412	32	18	1	0.81975
Escherichia coli	SF-572	B2	B2-2	GCA_001881355.1	5.14115	26	19	1	0.82095
Escherichia coli	SF-356	B2	B2-2	GCA_002028905.1	5.14793	25	18	1	0.81789
Escherichia coli	SF-231	B2	B2-2	GCA_002028965.1	5.19712	26	19	1	0.81926
Escherichia coli H263	H263	B2	B2-2	GCA_000190915.1	5.23907	64	15	1	0.81688
Escherichia coli	SF-083	B2	B2-2	GCA_002028705.1	5.15493	45	18	1	0.82932
Escherichia coli	SF-421	B2	B2-2	GCA_002029085.1	5.21019	35	18	1	0.81416
Escherichia coli	SF-425	B2	B2-2	GCA_002029115.1	5.20843	46	18	1	0.81296
Escherichia coli HVH 210 (4-3042480)	HVH 210 (4-3042480)	B2	B2-2	GCA_000459255.1	5.18096	10	19	1	0.82837
Escherichia coli HVH 35 (4-2962667)	HVH 35 (4-2962667)	B2	B2-2	GCA_000456545.1	5.21438	14	19	1	0.82114
Escherichia coli HVH 199 (4-5670322)	HVH 199 (4-5670322)	B2	B2-2	GCA_000459035.1	5.18196	5	19	1	0.82936
Escherichia coli	SF-313	B2	B2-2	GCA_002028865.1	5.159	24	18	1	0.81918
Escherichia coli	MOD1-EC6705	B2	B2-2	GCA_002522565.1	5.1185	124	19	1	0.80875
Escherichia coli	MOD1-EC665	B2	B2-2	GCA_002469425.1	5.12309	111	19	1	0.81966
Escherichia coli	MOD1-EC674	B2	B2-2	GCA_002465875.1	5.1237	132	19	1	0.82552
Escherichia coli	CG1MAC	B2	B2-2	GCA_003258455.1	5.16582	273	19	1	0.80136
Escherichia coli	SF-452	B2	B2-2	GCA_001877805.1	5.20332	49	19	1	0.816
Escherichia coli	upec-255	B2	B2-2	GCA_000778035.1	5.18344	77	19	1	0.80941
Escherichia coli HVH 192 (4-3054470)	HVH 192 (4-3054470)	B2	B2-2	GCA_000458895.1	5.23122	7	18	1	0.82173
Escherichia coli	MOD1-EC402	B2	B2-2	GCA_002466255.1	5.13502	121	18	1	0.81697
Escherichia coli	MOD1-EC417	B2	B2-2	GCA_002466185.1	5.12892	115	18	1	0.81078
Escherichia coli	MOD1-EC587	B2	B2-2	GCA_002465975.1	5.12829	138	18	1	0.814
Escherichia coli	121_ECOL	B2	B2-2	GCA_001054095.1	5.06714	151	18	1	0.81264
Escherichia coli	upec-139	B2	B2-2	GCA_000780755.1	5.02148	62	19	1	0.81667
Escherichia coli	upec-131	B2	B2-2	GCA_000780875.1	5.02801	74	19	1	0.8052
Escherichia coli	PA45B	B2	B2-2	GCA_002285755.1	5.22193	2	19	1	0.82481
Escherichia coli	SF-384	B2	B2-2	GCA_001877815.1	5.17007	30	18	1	0.82068
Escherichia coli	SF-166	B2	B2-2	GCA_001280385.1	5.02518	2	19	1	0.80921
Escherichia coli BIDMC 65	BIDMC 65	B2	B2-2	GCA_000692475.1	5.11453	9	18	1	0.82255
Escherichia coli	upec-51	B2	B2-2	GCA_000776965.1	5.07747	84	19	1	0.82369
Escherichia coli	Aut2013_WWKa_ALT_17	B2	B2-2	GCA_003146555.1	5.03721	167	18	1	0.80915
Escherichia coli	SF-423	B2	B2-2	GCA_002029095.1	5.09176	29	18	1	0.8189
Escherichia coli	MVAST0176	B2	B2-2	GCA_001881395.1	5.16986	43	19	1	0.81876
Escherichia coli	GN02627	B2	B2-2	GCA_001520195.1	5.11041	250	17	1	0.82067
Escherichia coli	SF-095	B2	B2-2	GCA_001881385.1	5.07307	22	19	1	0.83057
Escherichia coli	SF-383	B2	B2-2	GCA_002029035.1	5.16009	29	18	1	0.81747
Escherichia coli	SF-491	B2	B2-2	GCA_001881225.1	5.12866	37	18	1	0.8132
Escherichia coli	MVAST0098	B2	B2-2	GCA_001881125.1	5.1637	31	18	1	0.82268
Escherichia coli	MOD1-EC678	B2	B2-2	GCA_002456585.1	5.09393	110	19	1	0.82065
Escherichia coli	SF-560	B2	B2-2	GCA_001881305.1	5.09232	24	18	1	0.81968
Escherichia coli	MOD1-EC677	B2	B2-2	GCA_002456625.1	5.02287	99	18	1	0.81079
Escherichia coli	upec-75	B2	B2-2	GCA_000776655.1	5.14507	68	19	1	0.81741
Escherichia coli	SF-567	B2	B2-2	GCA_001881315.1	5.09638	26	18	1	0.8231
Escherichia coli	MOD1-EC670	B2	B2-2	GCA_002465905.1	5.05116	89	18	1	0.81836
Escherichia coli	MOD1-EC6554	B2	B2-2	GCA_002511685.1	5.30091	302	0	0	0.80173
Escherichia coli	A52	B2	B2-2	GCA_002911375.1	5.45171	239	0	0	0.80343
Escherichia coli APEC O1	APEC O1	B2	B2-2	GCA_000014845.1	5.49765	3	0	0	0.81203
Escherichia coli	MOD1-EC5969	B2	B2-2	GCA_002538735.1	5.48395	176	0	0	0.80937
Escherichia coli	HS13-1	B2	B2-2	GCA_002953435.1	5.55422	4	0	0	0.81688
Escherichia coli	MS8345	B2	B2-2	GCA_002846135.1	5.59542	3	0	0	0.81313
Escherichia coli	ST-95:E040	B2	B2-2	GCA_002416845.1	5.17882	205	0	0	0.81342
Escherichia coli HVH 170 (4-3026949)	HVH 170 (4-3026949)	B2	B2-2	GCA_000458555.1	5.66364	13	0	0	0.81587
Escherichia coli UMEA 3203-1	UMEA 3203-1	B2	B2-2	GCA_000460775.1	5.32895	20	0	0	0.81988
Escherichia coli	DP254	B2	B2-2	GCA_002930325.1	5.23284	193	0	0	0.80482
Escherichia coli	AL505	B2	B2-2	GCA_001499595.1	5.28241	110	0	0	0.81865
Escherichia coli HM605	HM605	B2	B2-2	GCA_000285375.1	5.26893	60	0	0	0.80909
Escherichia coli HM605	HM605	B2	B2-2	GCA_000264175.1	5.12207	289	0	0	0.81906
Escherichia coli	Cp4Salp37	B2	B2-2	GCA_002911225.1	5.34725	224	0	0	0.81691
Escherichia coli	MS7163	B2	B2-2	GCA_003020885.1	5.29251	3	0	0	0.81265
Escherichia coli UMEA 3162-1	UMEA 3162-1	B2	B2-2	GCA_000460475.1	5.2556	16	0	0	0.82031
Escherichia coli HVH 191 (3-9341900)	HVH 191 (3-9341900)	B2	B2-2	GCA_000458875.1	5.37002	18	0	0	0.82183
Escherichia coli DSM 30083 = JCM 1649 = ATCC 11775	ATCC 11775	B2	B2-2	GCA_000734955.1	4.98058	135	0	0	0.80538
Escherichia coli DSM 30083 = JCM 1649 = ATCC 11775	DSM 30083	B2	B2-2	GCA_000690815.1	5.03813	2	0	0	0.80356
Escherichia coli	GN02476	B2	B2-2	GCA_001520875.1	5.11451	187	0	0	0.80765
Escherichia coli S88	S88	B2	B2-2	GCA_000026285.1	5.16612	2	0	0	0.81164
Escherichia coli HVH 214 (4-3062198)	HVH 214 (4-3062198)	B2	B2-2	GCA_000507665.1	5.16904	9	0	0	0.81811
Escherichia coli HVH 217 (4-1022806)	HVH 217 (4-1022806)	B2	B2-2	GCA_000459375.1	5.26554	17	0	0	0.8206
Escherichia coli KTE7	KTE7	B2	B2-2	GCA_000407705.1	5.28855	10	0	0	0.81435
Escherichia coli KTE5	KTE5	B2	B2-2	GCA_000350665.1	5.29697	10	0	0	0.81456
Escherichia coli	SF-088	B2	B2-2	GCA_001280325.1	5.207	4	0	0	0.81149
Escherichia coli	A92	B2	B2-2	GCA_002911215.1	5.22777	184	0	0	0.81363
Escherichia coli UMEA 3702-1	UMEA 3702-1	B2	B2-2	GCA_000461595.1	5.07278	10	0	0	0.81476
Escherichia coli	GN04676	B2	B2-2	GCA_001621125.1	5.00167	273	0	0	0.81292
Escherichia coli HVH 203 (4-3126218)	HVH 203 (4-3126218)	B2	B2-2	GCA_000459115.1	5.03095	3	0	0	0.81643
Escherichia coli	SF-239	B2	B2-2	GCA_002028785.1	5.02698	42	0	0	0.8036
Escherichia coli UMEA 3662-1	UMEA 3662-1	B2	B2-2	GCA_000461495.1	5.11858	5	0	0	0.81242
Escherichia coli	96T	B2	B2-2	GCA_002911395.1	5.03684	151	0	0	0.81581
Escherichia coli HVH 102 (4-6906788)	HVH 102 (4-6906788)	B2	B2-2	GCA_000465155.1	5.09454	8	0	0	0.81421
Escherichia coli	H2S5	B2	B2-2	GCA_002911255.1	5.02285	141	0	0	0.80762
Escherichia coli HVH 5 (4-7148410)	HVH 5 (4-7148410)	B2	B2-2	GCA_000456085.1	5.10343	6	0	0	0.81532
Escherichia coli UMEA 3206-1	UMEA 3206-1	B2	B2-2	GCA_000460795.1	5.23636	12	0	0	0.81859
Escherichia coli HVH 201 (4-4459431)	HVH 201 (4-4459431)	B2	B2-2	GCA_000459075.1	5.20514	6	0	0	0.81888
Escherichia coli	H1S10	B2	B2-2	GCA_002911295.1	5.0632	131	0	0	0.81487
Escherichia coli	MVAST0326	B2	B2-2	GCA_001881145.1	5.18304	34	0	0	0.81437
Escherichia coli	Cp6Salp8	B2	B2-2	GCA_002911315.1	5.0967	120	0	0	0.80265
Escherichia coli	Cp6salp3	B2	B2-2	GCA_000951755.1	5.09528	227	0	0	0.8189
Escherichia coli HVH 32 (4-3773988)	HVH 32 (4-3773988)	B2	B2-2	GCA_000456505.1	5.19633	10	0	0	0.82168
Escherichia coli KTE27	KTE27	B2	B2-2	GCA_000407885.1	5.18073	7	0	0	0.81444
Escherichia coli KTE62	KTE62	B2	B2-2	GCA_000351605.1	5.14412	11	0	0	0.81517
Escherichia coli	GN04665	B2	B2-2	GCA_001621085.1	5.12261	126	0	0	0.80938
Escherichia coli	MGH164	B2	B2-2	GCA_002163195.1	5.08714	12	0	0	0.81062
Escherichia coli UMEA 3893-1	UMEA 3893-1	B2	B2-2	GCA_000461775.1	5.08747	9	0	0	0.81317
Escherichia coli	ECOR61	B2	B2-2	GCA_002189875.1	4.91519	379	0	0	0.80294
Escherichia coli	SF-264	B2	B2-2	GCA_002028795.1	5.16487	29	0	0	0.80513
Escherichia coli	GN05696	B2	B2-2	GCA_001621665.2	4.96612	3	0	0	0.80172
Escherichia coli	SF-495	B2	B2-2	GCA_001881235.1	5.12984	57	18	1	0.8307
Escherichia coli	upec-106	B2	B2-2	GCA_000781385.1	5.06972	99	19	1	0.80052
Escherichia coli	upec-249	B2	B2-2	GCA_000778135.1	5.10613	102	19	1	0.81732
Escherichia coli	upec-61	B2	B2-2	GCA_000776565.1	5.10149	97	19	1	0.82062
Escherichia coli	upec-94	B2	B2-2	GCA_000776735.1	4.99966	340	19	1	0.81095
Escherichia coli	SF-522	B2	B2-2	GCA_001881055.1	5.14703	36	18	1	0.81408
Escherichia coli	SF-371	B2	B2-2	GCA_002029005.1	5.06589	57	18	1	0.82028
Escherichia coli	MOD1-EC6579	B2	B2-2	GCA_002469055.1	5.05643	150	0	0	0.81114
Escherichia coli KTE176	KTE176	B2	B2-2	GCA_000326465.1	5.01854	89	0	0	0.8117
Escherichia coli KTE227	KTE227	B2	B2-2	GCA_000353145.1	5.1391	4	0	0	0.81438
Escherichia coli HVH 196 (4-4530470)	HVH 196 (4-4530470)	B2	B2-2	GCA_000458975.1	5.0571	8	0	0	0.81764
Escherichia coli	upec-62	B2	B2-2	GCA_000776055.1	5.07174	96	0	0	0.818
Escherichia coli	OS_09_006_-1	B2	B2-2	GCA_002087535.1	5.3786	23	0	0	0.82232
Escherichia coli KTE3	KTE3	B2	B2-2	GCA_000407685.1	5.17158	8	0	0	0.8165
Escherichia coli KTE4	KTE4	B2	B2-2	GCA_000350645.1	5.18849	10	0	0	0.81598
Escherichia coli HVH 59 (4-1119338)	HVH 59 (4-1119338)	B2	B2-2	GCA_000456885.1	5.28905	18	0	0	0.81436
Escherichia coli	SF-269	B2	B2-2	GCA_002028835.1	5.36103	60	18	1	0.82116
Escherichia coli	SF-362	B2	B2-2	GCA_002028915.1	5.23294	57	17	1	0.82386
Escherichia coli UMEA 3041-1	UMEA 3041-1	B2	B2-2	GCA_000460015.1	5.37255	10	19	1	0.81831
Escherichia coli	upec-136	B2	B2-2	GCA_000780695.1	5.30083	87	19	1	0.81215
Escherichia coli	upec-276	B2	B2-2	GCA_000777625.1	5.21373	133	19	1	0.81312
Escherichia coli KOEGE 32 (66a)	KOEGE 32 (66a)	B2	B2-2	GCA_000459635.1	5.22263	9	19	1	0.80566
Escherichia coli UMEA 3140-1	UMEA 3140-1	B2	B2-2	GCA_000460295.1	5.05948	10	0	0	0.81531
Escherichia coli	ABU 106	B2	B2-2	GCA_002761615.1	4.93952	108	0	0	0.81128
Escherichia coli	SF-151	B2	B2-2	GCA_002028755.1	5.09343	48	0	0	0.81002
Escherichia coli HVH 222 (4-2977443)	HVH 222 (4-2977443)	B2	B2-2	GCA_000459455.1	5.15117	18	0	0	0.8143
Escherichia coli	SF-501	B2	B2-2	GCA_001881045.1	5.12328	54	0	0	0.8022
Escherichia coli	upec-185	B2	B2-2	GCA_000779695.1	5.08623	99	0	0	0.80356
Escherichia coli KTE240	KTE240	B2	B2-2	GCA_000408305.1	4.98704	6	0	0	0.81597
Escherichia coli BIDMC 49b	BIDMC 49b	B2	B2-2	GCA_000522365.1	5.08021	6	0	0	0.81191
Escherichia coli BIDMC 49a	BIDMC 49a	B2	B2-2	GCA_000522385.1	5.08362	7	0	0	0.81148
Escherichia coli HVH 178 (4-3189163)	HVH 178 (4-3189163)	B2	B2-2	GCA_000495055.1	5.14158	7	0	0	0.82513
Escherichia coli HVH 148 (4-3192490)	HVH 148 (4-3192490)	B2	B2-2	GCA_000495015.1	5.33224	13	0	0	0.81452
Escherichia coli	MOD1-EC6701	B2	B2-2	GCA_002522635.1	5.13596	200	0	0	0.80903
Escherichia coli HVH 12 (4-7653042)	HVH 12 (4-7653042)	B2	B2-2	GCA_000494955.1	5.294	9	19	1	0.82644
Escherichia coli	SF-468	B2	B2-2	GCA_001280345.1	5.35864	6	0	0	0.80647
Escherichia coli	50857972	B2	B2-2	GCA_001463405.1	5.28487	198	0	0	0.81827
Escherichia coli HVH 104 (4-6977960)	HVH 104 (4-6977960)	B2	B2-2	GCA_000457455.1	5.36177	14	0	0	0.81361
Escherichia coli HVH 73 (4-2393174)	HVH 73 (4-2393174)	B2	B2-2	GCA_000457025.1	5.38414	13	0	0	0.81589
Escherichia coli HVH 180 (4-3051617)	HVH 180 (4-3051617)	B2	B2-2	GCA_000458685.1	5.18278	12	0	0	0.8122
Escherichia coli	SF-380	B2	B2-2	GCA_002029015.1	5.21424	32	0	0	0.81604
Escherichia coli	22.1-R1	B2	B2-2	GCA_002001665.1	5.20548	132	0	0	0.80323
Escherichia coli	MOD1-EC6207	B2	B2-2	GCA_002464445.1	5.04275	307	0	0	0.82729
Escherichia coli	018PP2015	B2	B2-2	GCA_001700095.1	5.14338	110	0	0	0.81653
Escherichia coli	8F	B2	B2-2	GCA_002911415.1	5.23747	291	0	0	0.81478
Escherichia coli	1.10-R8	B2	B2-2	GCA_002001685.1	5.31248	196	0	0	0.81292
Escherichia coli H252	H252	B2	B2-2	GCA_000190895.1	5.26697	85	0	0	0.82167
Escherichia coli	SF-075	B2	B2-2	GCA_002028715.1	5.22855	42	0	0	0.81268
Escherichia coli	F11	B2	B2-2	GCA_001561835.1	5.21165	149	0	0	0.81196
Escherichia coli	ECOR62	B2	B2-2	GCA_002189895.1	5.45023	1093	0	0	0.82522
Escherichia coli	SF-626	B2	B2-2	GCA_001881075.1	5.30856	61	18	1	0.80946
Escherichia coli	SF-149	B2	B2-2	GCA_002028745.1	5.25265	50	18	1	0.80859
Escherichia coli	SF-305	B2	B2-2	GCA_002028825.1	5.27998	50	18	1	0.8176
Escherichia coli	upec-250	B2	B2-2	GCA_000778105.1	5.20808	101	19	1	0.82085
Escherichia coli	upec-144	B2	B2-2	GCA_000780595.1	5.12676	103	19	1	0.82189
Escherichia coli	SF-094	B2	B2-2	GCA_002028955.1	5.22776	49	18	1	0.81031
Escherichia coli	SF-457	B2	B2-2	GCA_002029145.1	5.20839	57	19	1	0.82061
Escherichia coli	SF-523	B2	B2-2	GCA_001881275.1	5.15462	47	19	1	0.81147
Escherichia coli HVH 127 (4-7303629)	HVH 127 (4-7303629)	B2	B2-2	GCA_000457855.1	5.26961	18	19	1	0.82471
Escherichia coli	MOD1-EC728	B2	B2-2	GCA_002465675.1	5.31178	244	19	1	0.81793
Escherichia coli HVH 19 (4-7154984)	HVH 19 (4-7154984)	B2	B2-2	GCA_000456265.1	5.60726	23	19	1	0.82849
Escherichia coli	MVAST0234	B2	B2-2	GCA_001881425.1	5.29663	63	17	1	0.80736
Escherichia coli KTE179	KTE179	B2	B2-2	GCA_000326485.1	5.11874	84	18	1	0.81998
Escherichia coli KTE229	KTE229	B2	B2-2	GCA_000353165.1	5.1959	3	19	1	0.82119
Escherichia coli	HT2012123	B2	B2-2	GCA_002972705.1	4.7521	138	0	0	0.81132
Escherichia coli	GN02531	B2	B2-2	GCA_001521275.1	4.75235	168	0	0	0.80789
Escherichia coli TA014	TA014	B2	B2-2	GCA_002109905.1	4.72627	17	0	0	0.80359
Escherichia coli KTE141	KTE141	B2	B2-2	GCA_000352645.1	5.02912	7	19	1	0.8167
Escherichia coli	K56-12	B2	B2-2	GCA_002810045.1	4.98848	54	19	1	0.80294
Escherichia coli KTE187	KTE187	B2	B2-2	GCA_000350945.1	4.96002	8	18	1	0.81698
Escherichia coli KTE97	KTE97	B2	B2-2	GCA_000326545.1	4.86901	84	18	1	0.81345
Escherichia coli UMEA 3159-1	UMEA 3159-1	B2	B2-2	GCA_000460415.1	5.22026	18	18	1	0.83079
Escherichia coli KTE53	KTE53	B2	B2-2	GCA_000351485.1	5.21147	15	18	1	0.82601
Escherichia coli HVH 74 (4-1034782)	HVH 74 (4-1034782)	B2	B2-2	GCA_000457045.1	5.26375	15	19	1	0.83127
Escherichia coli	MOD1-EC6107	B2	B2-2	GCA_002536645.1	5.2245	246	19	1	0.83259
Escherichia coli UMEA 3121-1	UMEA 3121-1	B2	B2-2	GCA_000460215.1	5.37134	13	19	1	0.83259
Escherichia coli UMEA 3222-1	UMEA 3222-1	B2	B2-2	GCA_000460955.1	5.39212	24	19	1	0.8355
Escherichia coli HVH 207 (4-3113221)	HVH 207 (4-3113221)	B2	B2-2	GCA_000459195.1	5.24221	8	19	1	0.83041
Escherichia coli UMEA 3687-1	UMEA 3687-1	B2	B2-2	GCA_000461555.1	5.13976	13	19	1	0.8243
Escherichia coli	GN02163	B2	B2-2	GCA_001519475.1	5.09988	91	20	1	0.82021
Escherichia coli UMEA 3821-1	UMEA 3821-1	B2	B2-2	GCA_000461715.1	5.24099	17	19	1	0.82106
Escherichia coli UMEA 3087-1	UMEA 3087-1	B2	B2-2	GCA_000460095.1	5.15813	16	18	1	0.83289
Escherichia coli UMEA 4207-1	UMEA 4207-1	B2	B2-2	GCA_000461875.1	5.14591	13	18	1	0.82784
Escherichia coli	MOD1-EC5956	B2	B2-2	GCA_002539085.1	5.08304	126	18	1	0.82507
Escherichia coli UMEA 3264-1	UMEA 3264-1	B2	B2-2	GCA_000461075.1	5.21097	13	18	1	0.82736
Escherichia coli UMEA 3268-1	UMEA 3268-1	B2	B2-2	GCA_000461095.1	5.22371	9	19	1	0.82125
Escherichia coli	UCD_JA17	B2	B2-2	GCA_000599745.2	5.05913	98	18	1	0.81239
Escherichia coli	UCD_JA17_pb	B2	B2-2	GCA_000714915.1	5.11999	3	19	1	0.82441
Escherichia coli	upec-85	B2	B2-2	GCA_000776455.1	5.16927	113	19	1	0.81608
Escherichia coli	ECOR54	B2	B2-2	GCA_002189715.1	5.04208	242	18	1	0.81514
Escherichia coli	MOD1-EC5875	B2	B2-2	GCA_002547695.1	5.10877	168	18	1	0.81782
Escherichia coli KOEGE 61 (174a)	KOEGE 61 (174a)	B2	B2-2	GCA_000459775.1	5.15618	9	19	1	0.82288
Escherichia coli	136-1723	B2	B2-2	GCA_002244735.1	5.0324	106	18	1	0.82006
Escherichia coli	136-1863	B2	B2-2	GCA_002244775.1	5.10142	15	19	1	0.82148
Escherichia coli UMEA 3694-1	UMEA 3694-1	B2	B2-2	GCA_000461575.1	5.16361	8	19	1	0.82172
Escherichia coli UMEA 3342-1	UMEA 3342-1	B2	B2-2	GCA_000488155.1	5.18045	13	19	1	0.82375
Escherichia coli KOEGE 43 (105a)	KOEGE 43 (105a)	B2	B2-2	GCA_000459695.1	5.13746	20	18	1	0.82858
Escherichia coli KOEGE 44 (106a)	KOEGE 44 (106a)	B2	B2-2	GCA_000459715.1	5.04379	11	19	1	0.82255
Escherichia coli	MOD1-EC5696	B2	B2-2	GCA_002226425.1	4.96816	63	19	1	0.81857
Escherichia coli	GSK2524	B2	B2-2	GCA_000807555.1	4.94579	209	19	1	0.82064
Escherichia coli	GSK25213	B2	B2-2	GCA_000807565.1	4.94925	199	19	1	0.82036
Escherichia coli	GSK252FU	B2	B2-2	GCA_000807655.1	4.93658	201	19	1	0.82026
Escherichia coli	GSK2522	B2	B2-2	GCA_000807575.1	4.9336	203	19	1	0.8205
Escherichia coli	GSK2528	B2	B2-2	GCA_000807635.1	4.93507	194	19	1	0.82004
Escherichia coli	GSK252BU	B2	B2-2	GCA_000800675.1	4.93834	208	19	1	0.8203
Escherichia coli KTE60	KTE60	B2	B2-2	GCA_000351585.1	5.07079	20	19	1	0.81769
Escherichia coli	35-560	B2	B2-2	GCA_002243735.1	5.07431	18	18	1	0.81951
Escherichia coli	MOD1-EC6030	B2	B2-2	GCA_002542275.1	5.06224	148	19	1	0.81877
Escherichia coli UMEA 3014-1	UMEA 3014-1	B2	B2-2	GCA_000459955.1	5.08083	10	19	1	0.82207
Escherichia coli UMEA 3705-1	UMEA 3705-1	B2	B2-2	GCA_000461635.1	5.21988	17	19	1	0.82417
Escherichia coli HVH 83 (4-2051087)	HVH 83 (4-2051087)	B2	B2-2	GCA_000507625.1	5.1574	18	19	1	0.82957
Escherichia coli UMEA 3178-1	UMEA 3178-1	B2	B2-2	GCA_000460615.1	5.23682	19	19	1	0.82265
Escherichia coli	Aut2013_WWKa_ALT_45	B2	B2-2	GCA_003146515.1	5.03495	183	19	1	0.81673
Escherichia coli HVH 13 (4-7634056)	HVH 13 (4-7634056)	B2	B2-2	GCA_000456185.1	5.18311	23	19	1	0.82049
Escherichia coli HVH 2 (4-6943160)	HVH 2 (4-6943160)	B2	B2-2	GCA_000456025.1	5.21218	19	19	1	0.82135
Escherichia coli KTE99	KTE99	B2	B2-2	GCA_000326665.1	5.0433	122	18	1	0.82241
Escherichia coli KTE188	KTE188	B2	B2-2	GCA_000350965.1	5.24966	10	19	1	0.83042
Escherichia coli KTE230	KTE230	B2	B2-2	GCA_000351305.1	5.2279	15	19	1	0.8292
Escherichia coli	upec-251	B2	B2-2	GCA_000778095.1	5.2833	102	19	1	0.82258
Escherichia coli	MOD1-EC6559	B2	B2-2	GCA_002469235.1	5.04045	205	19	1	0.81828
Escherichia coli	OS_02_001_-1	B2	B2-2	GCA_002087575.1	5.09369	11	19	1	0.82494
Escherichia coli HVH 227 (4-2277670)	HVH 227 (4-2277670)	B2	B2-2	GCA_000459515.1	5.21917	19	19	1	0.82992
Escherichia coli	UMB0789	B2	B2-2	GCA_002861265.1	5.00064	70	18	1	0.81195
Escherichia coli KTE67	KTE67	B2	B2-2	GCA_000351645.1	5.02949	5	19	1	0.82699
Escherichia coli HVH 39 (4-2679949)	HVH 39 (4-2679949)	B2	B2-2	GCA_000456605.1	5.07718	19	17	1	0.82986
Escherichia coli	MOD1-EC5982	B2	B2-2	GCA_002538635.1	5.10249	117	2	0	0.81808
Escherichia coli	MOD1-EC6888	B2	B2-2	GCA_002519925.1	5.01272	160	0	0	0.82178
Escherichia coli	GN02766	B2	B2-2	GCA_001520815.2	5.27548	3	17	1	0.82174
Escherichia coli	MOD1-EC6783	B2	B2-2	GCA_002521835.1	5.25728	157	19	1	0.82587
Escherichia coli	MOD1-EC6690	B2	B2-2	GCA_002522745.1	5.24879	139	19	1	0.82357
Escherichia coli	upec-181	B2	B2-2	GCA_000779795.1	5.18949	99	18	1	0.83002
Escherichia coli	MOD1-EC6497	B2	B2-2	GCA_002513305.1	5.37351	190	19	1	0.83653
Escherichia coli HVH 172 (4-3248542)	HVH 172 (4-3248542)	B2	B2-2	GCA_000458605.1	5.3953	17	19	1	0.83717
Escherichia coli	upec-109	B2	B2-2	GCA_000781355.1	5.20891	86	19	1	0.82466
Escherichia coli	upec-288	B2	B2-2	GCA_000777435.1	5.26051	126	19	1	0.81483
Escherichia coli	HT2012108	B2	B2-2	GCA_002972295.1	5.1414	91	18	1	0.82274
Escherichia coli TOP2652	TOP2652	B2	B2-2	GCA_000397745.1	5.19689	306	18	1	0.82146
Escherichia coli	UCD_JA23	B2	B2-2	GCA_000599765.2	4.93279	167	19	1	0.82154
Escherichia coli	upec-229	B2	B2-2	GCA_000776715.1	5.17144	90	18	1	0.82938
Escherichia coli	GN05109	B2	B2-2	GCA_001621345.1	5.00125	67	18	1	0.81529
Escherichia coli HVH 23 (4-6066488)	HVH 23 (4-6066488)	B2	B2-2	GCA_000507605.1	5.0328	18	18	1	0.82299
Escherichia coli TOP2662-3	TOP2662-3	B2	B2-2	GCA_000397685.1	4.99364	135	18	1	0.81534
Escherichia coli TOP2662-1	TOP2662-1	B2	B2-2	GCA_000397645.1	4.92588	147	19	1	0.82189
Escherichia coli TOP2652	TOP2652	B2	B2-2	GCA_000397625.1	4.87822	145	19	1	0.80445
Escherichia coli TOP2662-2	TOP2662-2	B2	B2-2	GCA_000397665.1	4.93215	152	19	1	0.81976
Escherichia coli TOP2662-4	TOP2662-4	B2	B2-2	GCA_000397705.1	4.97721	152	19	1	0.81612
Escherichia coli	UCD_JA23_pb	B2	B2-2	GCA_000715035.1	4.90454	3	18	1	0.81868
Escherichia coli HVH 204 (4-3112802)	HVH 204 (4-3112802)	B2	B2-2	GCA_000459135.1	4.89414	8	17	1	0.8231
Escherichia coli KTE167	KTE167	B2	B2-2	GCA_000326905.1	4.97344	108	18	1	0.82426
Escherichia coli KTE174	KTE174	B2	B2-2	GCA_000326605.1	4.98662	111	18	1	0.82621
Escherichia coli KTE160	KTE160	B2	B2-2	GCA_000326405.1	4.988	110	18	1	0.82511
Escherichia coli	MOD1-EC679	B2	B2-2	GCA_002456615.1	5.01549	163	19	1	0.81659
Escherichia coli KTE223	KTE223	B2	B2-2	GCA_000353125.1	5.10055	9	19	1	0.82822
Escherichia coli KTE226	KTE226	B2	B2-2	GCA_000408285.1	5.13654	18	19	1	0.82955
Escherichia coli KTE220	KTE220	B2	B2-2	GCA_000351245.1	5.1241	11	19	1	0.82891
Escherichia coli	MOD1-EC714	B2	B2-2	GCA_002456495.1	5.17439	157	19	1	0.82347
Escherichia coli HVH 20 (4-5865042)	HVH 20 (4-5865042)	B2	B2-2	GCA_000456285.1	5.23055	14	19	1	0.83511
Escherichia coli	K56-41	B2	B2-2	GCA_002810035.1	5.12296	139	19	1	0.8281
Escherichia coli 907391	907391	B2	B2-2	GCA_000488315.1	5.07791	114	18	1	0.81935
Escherichia coli	MOD1-EC713	B2	B2-2	GCA_002465715.1	5.10235	165	19	1	0.82112
Escherichia coli A25922R	A25922R	B2	B2-2	GCA_000488815.1	5.04176	145	18	1	0.82171
Escherichia coli LCT-EC52	LCT-EC52	B2	B2-2	GCA_000331615.1	5.20975	37	18	1	0.82772
Escherichia coli LCT-EC59	LCT-EC59	B2	B2-2	GCA_000317395.1	5.22178	33	18	1	0.82941
Escherichia coli LCT-EC106	LCT-EC106	B2	B2-2	GCA_000259695.1	5.2126	37	18	1	0.82776
Escherichia coli ATCC 25922	ATCC 25922	B2	B2-2	GCA_000743255.1	5.20344	3	19	1	0.8262
Escherichia coli	ATCC 25922	B2	B2-2	GCA_001997075.1	5.14676	83	18	1	0.82615
Escherichia coli	DBS1	B2	B2-2	GCA_900128765.1	5.15114	70	18	1	0.80694
Escherichia coli ATCC 25922	ATCC 25922	B2	B2-2	GCA_000401755.1	5.11328	116	19	1	0.82354
Escherichia coli	ABU 148	B2	B2-2	GCA_002761765.1	5.15418	87	18	1	0.82267
Escherichia coli Nissle 1917	Nissle 1917	B2	B2-2	GCA_000333215.1	5.01992	143	18	1	0.83417
Escherichia coli Nissle 1917	Nissle 1917	B2	B2-2	GCA_000714595.1	5.4412	1	17	1	0.82633
Escherichia coli	ECOR56	B2	B2-2	GCA_002189765.1	5.02825	454	18	1	0.81661
Escherichia coli	MOD1-EC680	B2	B2-2	GCA_002456565.1	4.9164	180	18	1	0.8197
Escherichia coli	GN04499	B2	B2-2	GCA_001620985.1	4.99957	242	16	1	0.81567
Escherichia coli KTE63	KTE63	B2	B2-2	GCA_000352385.1	5.06055	8	19	1	0.82124
Escherichia coli HVH 68 (4-0888028)	HVH 68 (4-0888028)	B2	B2-2	GCA_000456965.1	5.1578	14	19	1	0.82249
Escherichia coli UMEA 3216-1	UMEA 3216-1	B2	B2-2	GCA_000460875.1	5.03066	13	17	1	0.82709
Escherichia coli	blood-10-1126	B2	B2-2	GCA_000779125.1	5.35861	131	19	1	0.8244
Escherichia coli	blood-10-1105	B2	B2-2	GCA_000779025.1	5.35668	122	19	1	0.82822
Escherichia coli	ECG11	B2	B2-2	GCA_900130195.1	5.21215	25	19	1	0.83524
Escherichia coli	AIEC01	B2	B2-2	GCA_900130205.1	5.21502	353	19	1	0.82023
Escherichia coli HVH 149 (4-4451880)	HVH 149 (4-4451880)	B2	B2-2	GCA_000458215.1	5.20853	15	18	1	0.82744
Escherichia coli UMEA 3172-1	UMEA 3172-1	B2	B2-2	GCA_000460515.1	5.27935	13	18	1	0.83537
Escherichia coli	MOD1-EC6744	B2	B2-2	GCA_002522265.1	5.32562	172	19	1	0.82397
Escherichia coli H378	H378	B2	B2-2	GCA_002110115.1	5.34391	81	18	1	0.82778
Escherichia coli	19.1-R3	B2	B2-2	GCA_002001585.1	5.21373	176	19	1	0.82552
Escherichia coli HVH 116 (4-6879942)	HVH 116 (4-6879942)	B2	B2-2	GCA_000457675.1	5.24195	13	19	1	0.83456
Escherichia coli LAU-EC6	LAU-EC6	B2	B2-2	GCA_000506445.2	5.35719	105	18	1	0.82516
Escherichia coli	MOD1-EC691	B2	B2-2	GCA_002465795.1	5.29701	229	19	1	0.83245
Escherichia coli	MOD1-EC705	B2	B2-2	GCA_002465425.1	5.34652	246	19	1	0.83736
Escherichia coli	GN02009	B2	B2-2	GCA_001519125.1	5.20295	151	19	1	0.82023
Escherichia coli	GN06113	B2	B2-2	GCA_001621995.1	5.14723	251	19	1	0.82503
Escherichia coli	MOD1-EC675	B2	B2-2	GCA_002465855.1	5.18319	177	19	1	0.83115
Escherichia coli HVH 16 (4-7649002)	HVH 16 (4-7649002)	B2	B2-2	GCA_000456205.1	5.18427	11	19	1	0.82591
Escherichia coli KTE87	KTE87	B2	B2-2	GCA_000351825.1	5.27278	11	19	1	0.82902
Escherichia coli	GN02323	B2	B2-2	GCA_001519595.1	5.12671	219	17	1	0.82649
Escherichia coli	GN02045	B2	B2-2	GCA_001519215.1	5.08967	120	19	1	0.81692
Escherichia coli	MOD1-EC724	B2	B2-2	GCA_002465205.1	5.09332	150	19	1	0.82165
Escherichia coli	GN02787	B2	B2-2	GCA_001521155.1	5.06595	256	17	1	0.82563
Escherichia coli	MOD1-EC681	B2	B2-2	GCA_002465845.1	5.07163	164	19	1	0.82747
Escherichia coli	upec-93	B2	B2-2	GCA_000776695.1	5.11767	203	19	1	0.82617
Escherichia coli	GN02748	B2	B2-2	GCA_001518355.1	5.07666	269	18	1	0.82935
Escherichia coli	MOD1-EC719	B2	B2-2	GCA_002456305.1	5.08723	190	19	1	0.8236
Escherichia coli	13.1-R2	B2	B2-2	GCA_002002165.1	5.09949	130	2	0	0.82038
Escherichia coli	13.1-R2a	B2	B2-2	GCA_002002125.1	5.1135	128	2	0	0.82624
Escherichia coli	GN05963	B2	B2-2	GCA_001621885.1	5.07189	228	18	1	0.81905
Escherichia coli HVH 142 (4-5627451)	HVH 142 (4-5627451)	B2	B2-2	GCA_000458095.1	5.25817	24	19	1	0.8245
Escherichia coli HVH 86 (4-7026218)	HVH 86 (4-7026218)	B2	B2-2	GCA_000494975.1	5.61956	19	19	1	0.8295
Escherichia coli	ST-73:E053	B2	B2-2	GCA_002416865.1	5.34101	333	17	1	0.82047
Escherichia coli HVH 95 (4-6074464)	HVH 95 (4-6074464)	B2	B2-2	GCA_000457345.1	5.241	18	19	1	0.82866
Escherichia coli 907892	907892	B2	B2-2	GCA_000488475.1	5.17698	174	18	1	0.81635
Escherichia coli HVH 212 (3-9305343)	HVH 212 (3-9305343)	B2	B2-2	GCA_000459295.1	5.40546	20	19	1	0.83994
Escherichia coli	upec-193	B2	B2-2	GCA_000779545.1	5.31526	141	19	1	0.83168
Escherichia coli HVH 96 (4-5934869)	HVH 96 (4-5934869)	B2	B2-2	GCA_000457385.1	5.34461	12	19	1	0.83235
Escherichia coli HVH 92 (4-5930790)	HVH 92 (4-5930790)	B2	B2-2	GCA_000457325.1	5.39806	10	19	1	0.83231
Escherichia coli UMEA 3652-1	UMEA 3652-1	B2	B2-2	GCA_000463605.1	5.24573	7	19	1	0.83778
Escherichia coli	UPEC 26-1	B2	B2-2	GCA_001693315.1	5.32975	2	19	1	0.82183
Escherichia coli	MOD1-EC692	B2	B2-2	GCA_002466835.1	5.15476	167	19	1	0.83194
Escherichia coli HVH 51 (4-2172526)	HVH 51 (4-2172526)	B2	B2-2	GCA_000456785.1	5.15847	10	19	1	0.82669
Escherichia coli	34-481	B2	B2-2	GCA_002244945.1	5.13202	16	19	1	0.82266
Escherichia coli HVH 77 (4-2605759)	HVH 77 (4-2605759)	B2	B2-2	GCA_000457085.1	5.37803	58	14	1	0.83921
Escherichia coli HVH 161 (4-3119890)	HVH 161 (4-3119890)	B2	B2-2	GCA_000458435.1	5.34178	16	19	1	0.83497
Escherichia coli KTE201	KTE201	B2	B2-2	GCA_000351045.1	5.28166	13	19	1	0.82951
Escherichia coli KTE124	KTE124	B2	B2-2	GCA_000326225.1	5.12767	127	18	1	0.82885
Escherichia coli	MOD1-EC5001	B2	B2-2	GCA_002232105.1	5.26496	239	19	1	0.81835
Escherichia coli HVH 160 (4-5695937)	HVH 160 (4-5695937)	B2	B2-2	GCA_000458415.1	5.28686	12	18	1	0.82683
Escherichia coli HVH 7 (4-7315031)	HVH 7 (4-7315031)	B2	B2-2	GCA_000456125.1	5.28155	23	19	1	0.83488
Escherichia coli HVH 61 (4-2736020)	HVH 61 (4-2736020)	B2	B2-2	GCA_000456905.1	5.22204	8	19	1	0.83249
Escherichia coli	56.2r	B2	B2-2	GCA_002166685.1	5.24706	256	18	1	0.82938
Escherichia coli	56.3r	B2	B2-2	GCA_002166705.1	5.26019	247	18	1	0.82997
Escherichia coli	upec-237	B2	B2-2	GCA_000778335.1	5.40213	123	19	1	0.82366
Escherichia coli	upec-39	B2	B2-2	GCA_000777165.1	5.42222	140	19	1	0.83049
Escherichia coli HVH 216 (4-3042952)	HVH 216 (4-3042952)	B2	B2-2	GCA_000459355.1	5.23722	18	18	1	0.83725
Escherichia coli KTE214	KTE214	B2	B2-2	GCA_000351205.1	5.40537	7	19	1	0.82834
Escherichia coli HVH 156 (4-3206505)	HVH 156 (4-3206505)	B2	B2-2	GCA_000458335.1	5.32522	13	19	1	0.83687
Escherichia coli KTE39	KTE39	B2	B2-2	GCA_000350865.1	5.2935	10	19	1	0.82742
Escherichia coli	ABU 84	B2	B2-2	GCA_002761685.1	5.22318	78	19	1	0.83813
Escherichia coli	MOD1-EC6697	B2	B2-2	GCA_002522665.1	5.09544	134	19	1	0.80897
Escherichia coli UMEA 3208-1	UMEA 3208-1	B2	B2-2	GCA_000460815.1	5.22682	11	18	1	0.82984
Escherichia coli	TUM17747	B2	B2-2	GCA_003203375.1	5.14117	168	19	1	0.81971
Escherichia coli	OS_02_042_-1	B2	B2-2	GCA_002087615.1	5.24991	14	18	1	0.82633
Escherichia coli KTE218	KTE218	B2	B2-2	GCA_000353105.1	5.12605	5	19	1	0.82663
Escherichia coli KTE153	KTE153	B2	B2-2	GCA_000326385.1	4.98543	99	18	1	0.82827
Escherichia coli	JPH264	B2	B2-2	GCA_001562835.1	5.10947	142	18	1	0.80847
Escherichia coli	GN02529	B2	B2-2	GCA_001520215.1	5.04082	254	16	1	0.8188
Escherichia coli	BWH59	B2	B2-2	GCA_001030285.1	5.09319	8	19	1	0.8238
Escherichia coli	125-1609	B2	B2-2	GCA_002244665.1	5.1004	10	19	1	0.82298
Escherichia coli	125-1642	B2	B2-2	GCA_002244705.1	5.07631	14	19	1	0.81945
Escherichia coli	GN02392	B2	B2-2	GCA_001520055.1	5.05612	201	16	1	0.80765
Escherichia coli	MOD1-EC697	B2	B2-2	GCA_002465725.1	5.14196	227	19	1	0.82366
Escherichia coli	MOD1-EC662	B2	B2-2	GCA_002456735.1	5.06313	128	19	1	0.81866
Escherichia coli	GN02007	B2	B2-2	GCA_001519115.1	5.06048	153	19	1	0.82119
Escherichia coli KTE137	KTE137	B2	B2-2	GCA_000326325.1	5.00154	99	18	1	0.82002
Escherichia coli KTE209	KTE209	B2	B2-2	GCA_000353025.1	5.11008	3	19	1	0.82281
Escherichia coli HVH 114 (4-7037740)	HVH 114 (4-7037740)	B2	B2-2	GCA_000457615.1	5.2752	12	19	1	0.83004
Escherichia coli	GN05681	B2	B2-2	GCA_001621675.1	5.15659	117	19	1	0.82874
Escherichia coli	17.3r	B2	B2-2	GCA_002166125.1	5.15359	196	18	1	0.82681
Escherichia coli	17.1a	B2	B2-2	GCA_002166025.1	5.16661	226	18	1	0.82738
Escherichia coli	17.2p	B2	B2-2	GCA_002166095.1	5.16164	223	18	1	0.82776
Escherichia coli	GN02547	B2	B2-2	GCA_001521355.1	5.21396	277	16	1	0.8217
Escherichia coli	blood-10-1386	B2	B2-2	GCA_000779615.1	5.23219	120	19	1	0.81373
Escherichia coli	blood-10-1365	B2	B2-2	GCA_000779455.1	5.1432	331	19	1	0.82377
Escherichia coli	MGH122	B2	B2-2	GCA_001030435.1	5.51031	15	19	1	0.8341
Escherichia coli	BIDMC97	B2	B2-2	GCA_001030445.1	5.36275	18	19	1	0.83074
Escherichia coli	blood-08-0379	B2	B2-2	GCA_000782755.1	5.2843	118	19	1	0.82899
Escherichia coli HVH 109 (4-6977162)	HVH 109 (4-6977162)	B2	B2-2	GCA_000457515.1	5.58481	23	19	1	0.83363
Escherichia coli	ECOR57	B2	B2-2	GCA_002189815.1	5.70106	1440	18	1	0.82838
Escherichia coli	MOD1-EC6122	B2	B2-2	GCA_002536335.1	5.10413	181	19	1	0.82435
Escherichia coli	Win2012_WWKa_OUT_49	B2	B2-2	GCA_003144915.1	5.10182	185	19	1	0.82715
Escherichia coli	upec-79	B2	B2-2	GCA_000776415.1	5.25883	120	18	1	0.83441
Escherichia coli UMEA 3161-1	UMEA 3161-1	B2	B2-2	GCA_000460455.1	5.19015	16	19	1	0.82907
Escherichia coli	ECOR55	B2	B2-2	GCA_002189735.1	5.03226	234	18	1	0.80531
Escherichia coli UMEA 3233-1	UMEA 3233-1	B2	B2-2	GCA_000460995.1	5.21103	14	18	1	0.82885
Escherichia coli 83972	83972	B2	B2-2	GCA_000159295.1	5.10616	105	18	1	0.83596
Escherichia coli ABU 83972	ABU 83972	B2	B2-2	GCA_000148365.1	5.13296	2	19	1	0.82556
Escherichia coli UMEA 3173-1	UMEA 3173-1	B2	B2-2	GCA_000460535.1	5.15853	16	19	1	0.83231
Escherichia coli UMEA 3337-1	UMEA 3337-1	B2	B2-2	GCA_000461275.1	5.21319	8	19	1	0.82634
Escherichia coli UMEA 3490-1	UMEA 3490-1	B2	B2-2	GCA_000461355.1	5.19806	9	19	1	0.82297
Escherichia coli	sheep17	B2	B2-2	GCA_001616475.1	5.08717	58	18	1	0.82689
Escherichia coli	blood-08-0215	B2	B2-2	GCA_000782775.1	5.12828	106	19	1	0.82987
Escherichia coli UMEA 3257-1	UMEA 3257-1	B2	B2-2	GCA_000461055.1	5.30394	20	19	1	0.83394
Escherichia coli	UM131	B2	B2-2	GCA_001571575.1	5.19742	89	18	1	0.8241
Escherichia coli HVH 117 (4-6857191)	HVH 117 (4-6857191)	B2	B2-2	GCA_000457695.1	5.28102	20	19	1	0.83112
Escherichia coli	UCD-JA09	B2	B2-2	GCA_001306575.1	5.18843	104	18	1	0.82013
Escherichia coli	GN02590	B2	B2-2	GCA_001520555.1	5.16908	310	17	1	0.82193
Escherichia coli	MOD1-EC673	B2	B2-2	GCA_002456655.1	5.1618	212	19	1	0.82839
Escherichia coli	MOD1-EC682	B2	B2-2	GCA_002456555.1	5.14665	201	19	1	0.82702
Escherichia coli B108	B108	B2	B2-2	GCA_002109615.1	5.23991	90	18	1	0.82252
Escherichia coli HVH 37 (4-2773848)	HVH 37 (4-2773848)	B2	B2-2	GCA_000456565.1	5.15746	13	19	1	0.8206
Escherichia coli	MOD1-EC699	B2	B2-2	GCA_002465505.1	5.11462	145	19	1	0.82101
Escherichia coli HVH 40 (4-1219782)	HVH 40 (4-1219782)	B2	B2-2	GCA_000456625.1	5.22892	8	19	1	0.82528
Escherichia coli HVH 27 (4-7449267)	HVH 27 (4-7449267)	B2	B2-2	GCA_000456405.1	5.12334	15	19	1	0.83026
Escherichia coli str. 'clone D i14'	clone D i14	B2	B2-2	GCA_000233895.1	5.03839	1	19	1	0.82234
Escherichia coli str. 'clone D i2'	clone D i2	B2	B2-2	GCA_000233875.1	5.03839	1	19	1	0.82235
Escherichia coli HVH 103 (4-5904188)	HVH 103 (4-5904188)	B2	B2-2	GCA_000457435.1	5.14182	15	18	1	0.82789
Escherichia coli HVH 31 (4-2602156)	HVH 31 (4-2602156)	B2	B2-2	GCA_000456485.1	5.06388	6	20	1	0.82804
Escherichia coli HVH 120 (4-6978681)	HVH 120 (4-6978681)	B2	B2-2	GCA_000457755.1	5.06053	10	19	1	0.82243
Escherichia coli	GN02411	B2	B2-2	GCA_001520895.1	4.94018	223	15	1	0.80966
Escherichia coli CFT073	CFT073	B2	B2-2	GCA_000007445.1	5.23143	1	17	1	0.82718
Escherichia coli 8-415-05_S4_C2	8-415-05_S4_C2	B2	B2-2	GCA_000711365.1	5.24515	128	19	1	0.83059
Escherichia coli 8-415-05_S4_C1	8-415-05_S4_C1	B2	B2-2	GCA_000711455.1	5.27585	141	18	1	0.83015
Escherichia coli 8-415-05_S3_C1	8-415-05_S3_C1	B2	B2-2	GCA_000713495.1	5.34037	154	19	1	0.83051
Escherichia coli 8-415-05_S3_C3	8-415-05_S3_C3	B2	B2-2	GCA_000713455.1	5.30649	152	18	1	0.83058
Escherichia coli 8-415-05_S3_C2	8-415-05_S3_C2	B2	B2-2	GCA_000713585.1	5.29081	134	18	1	0.83288
Escherichia coli 8-415-05_S4_C3	8-415-05_S4_C3	B2	B2-2	GCA_000711435.1	5.32944	139	18	1	0.83094
Escherichia coli UMEA 3220-1	UMEA 3220-1	B2	B2-2	GCA_000460915.1	5.15801	16	19	1	0.8274
Escherichia coli	MOD1-EC695	B2	B2-2	GCA_002466805.1	5.16551	165	18	1	0.82096
Escherichia coli HVH 58 (4-2839709)	HVH 58 (4-2839709)	B2	B2-2	GCA_000456865.1	5.23107	6	20	1	0.82519
Escherichia coli HVH 89 (4-5885604)	HVH 89 (4-5885604)	B2	B2-2	GCA_000457265.1	5.18371	9	19	1	0.83379
Escherichia coli UMEA 3707-1	UMEA 3707-1	B2	B2-2	GCA_000461655.1	5.25318	18	19	1	0.83009
Escherichia coli HVH 169 (4-1075578)	HVH 169 (4-1075578)	B2	B2-2	GCA_000458535.1	5.19956	13	19	1	0.83135
Escherichia coli	K56-2	B2	B2-2	GCA_002803475.1	5.11644	101	19	1	0.82649
Escherichia coli	FDAARGOS_170	B2	B2-2	GCA_001471755.2	5.23623	1	19	1	0.82141
Escherichia coli UMEA 3175-1	UMEA 3175-1	B2	B2-2	GCA_000460575.1	5.2889	11	19	1	0.82969
Escherichia coli HVH 157 (4-3406229)	HVH 157 (4-3406229)	B2	B2-2	GCA_000458355.1	5.23508	23	19	1	0.83072
Escherichia coli HVH 144 (4-4451937)	HVH 144 (4-4451937)	B2	B2-2	GCA_000458135.1	5.30126	12	19	1	0.83208
Escherichia coli HVH 132 (4-6876862)	HVH 132 (4-6876862)	B2	B2-2	GCA_000457915.1	5.25654	17	19	1	0.83355
Escherichia coli HVH 218 (4-4500903)	HVH 218 (4-4500903)	B2	B2-2	GCA_000459395.1	5.27492	20	19	1	0.83346
Escherichia coli HVH 220 (4-5876842)	HVH 220 (4-5876842)	B2	B2-2	GCA_000459415.1	5.26325	23	19	1	0.83398
Escherichia coli HVH 159 (4-5818141)	HVH 159 (4-5818141)	B2	B2-2	GCA_000458395.1	5.25667	13	19	1	0.83289
Escherichia coli	31-679	B2	B2-2	GCA_002244465.1	5.09499	26	19	1	0.82779
Escherichia coli	MOD1-EC5422	B2	B2-2	GCA_002474555.1	5.1323	244	19	1	0.82545
Escherichia coli	upec-260	B2	B2-2	GCA_000777895.1	5.23529	127	19	1	0.8223
Escherichia coli	upec-261	B2	B2-2	GCA_000777845.1	5.34101	133	18	1	0.83467
Escherichia coli	80//6	B2	B2-2	GCA_001865925.1	4.96014	53	19	1	0.80564
Escherichia coli	EC-117-2-3	B2	B2-2	GCA_002268255.1	4.95957	136	18	1	0.81184
Escherichia coli	upec-14	B2	B2-2	GCA_000780675.1	5.18334	110	18	1	0.82226
Escherichia coli	B-11870	B2	B2-2	GCA_001865985.1	5.63819	82	19	1	0.8129
Escherichia coli HVH 138 (4-6066704)	HVH 138 (4-6066704)	B2	B2-2	GCA_000458015.1	5.22404	11	19	1	0.83409
Escherichia coli	MOD1-EC717	B2	B2-2	GCA_002465245.1	5.1492	170	19	1	0.83265
Escherichia coli HVH 197 (4-4466217)	HVH 197 (4-4466217)	B2	B2-2	GCA_000458995.1	5.57182	12	19	1	0.83892
Escherichia coli	VACI-14	B2	B2-2	GCA_001448025.1	5.24107	109	19	1	0.83366
Escherichia coli	MEH_VIC	B2	B2-2	GCA_002155835.1	5.35535	147	19	1	0.8282
Escherichia coli HVH 21 (4-4517873)	HVH 21 (4-4517873)	B2	B2-2	GCA_000456305.1	5.37583	16	18	1	0.8293
Escherichia coli	GN04153	B2	B2-2	GCA_001521635.1	5.14048	360	16	1	0.82306
Escherichia coli	EC-117-5-4	B2	B2-2	GCA_002268325.1	4.97311	135	18	1	0.80253
Escherichia coli	MOD1-EC6445	B2	B2-2	GCA_002512175.1	5.07616	149	0	0	0.81776
Escherichia coli	GN02820	B2	B2-2	GCA_001520845.1	5.137	306	0	0	0.82062
Escherichia coli	MOD1-EC6212	B2	B2-2	GCA_002464145.1	5.11125	220	0	0	0.81453
Escherichia coli	MOD1-EC726	B2	B2-2	GCA_002465185.1	5.1413	173	0	0	0.82002
Escherichia coli	MOD1-EC6580	B2	B2-2	GCA_002469045.1	5.17155	267	0	0	0.81439
Escherichia coli 6-175-07_S3_C1	6-175-07_S3_C1	B2	B2-2	GCA_000714345.1	5.23767	106	0	0	0.81966
Escherichia coli 6-319-05_S3_C3	6-319-05_S3_C3	B2	B2-2	GCA_000713185.1	5.28577	103	0	0	0.82217
Escherichia coli 6-175-07_S3_C2	6-175-07_S3_C2	B2	B2-2	GCA_000711525.1	5.67227	123	0	0	0.8175
Escherichia coli 6-175-07_S3_C3	6-175-07_S3_C3	B2	B2-2	GCA_000714375.1	5.37001	106	0	0	0.8202
Escherichia coli 6-319-05_S3_C1	6-319-05_S3_C1	B2	B2-2	GCA_000713045.1	5.3626	113	0	0	0.82093
Escherichia coli 6-319-05_S3_C2	6-319-05_S3_C2	B2	B2-2	GCA_000713035.1	5.36396	129	0	0	0.82078
Escherichia coli HVH 228 (4-7787030)	HVH 228 (4-7787030)	B2	B2-2	GCA_000459535.1	5.07018	11	19	1	0.83169
Escherichia coli	MOD1-EC6671	B2	B2-2	GCA_002484565.1	5.04786	106	19	1	0.81386
Escherichia coli BIDMC 83	BIDMC 83	B2	B2-2	GCA_000633655.1	5.09073	97	18	1	0.82377
Escherichia coli UMEA 3185-1	UMEA 3185-1	B2	B2-2	GCA_000460655.1	5.14993	9	19	1	0.8331
Escherichia coli HVH 171 (4-3191958)	HVH 171 (4-3191958)	B2	B2-2	GCA_000458575.1	5.18462	15	19	1	0.83507
Escherichia coli	MOD1-EC6940	B2	B2-2	GCA_002519465.1	5.20991	150	19	1	0.82823
Escherichia coli UMEA 3244-1	UMEA 3244-1	B2	B2-2	GCA_000461035.1	5.06921	15	19	1	0.833
Escherichia coli	D8	B2	B2-2	GCA_001900395.1	5.13065	1	17	1	0.81766
Escherichia coli UMEA 4075-1	UMEA 4075-1	B2	B2-2	GCA_000461835.1	5.22425	9	19	1	0.83747
Escherichia coli	UPEC_008	B2	B2-2	GCA_001651625.1	5.15144	173	18	1	0.82034
Escherichia coli UMEA 3193-1	UMEA 3193-1	B2	B2-2	GCA_000460695.1	5.30898	21	19	1	0.83033
Escherichia coli	MOD1-EC5953	B2	B2-2	GCA_002539255.1	5.1608	102	19	1	0.82426
Escherichia coli	ECOR60	B2	B2-2	GCA_002189835.1	5.04427	325	18	1	0.82863
Escherichia coli	K56-44	B2	B2-2	GCA_002810105.1	5.09031	92	19	1	0.82671
Escherichia coli	No.12	B2	B2-2	GCA_001865915.1	5.07846	58	19	1	0.81292
Escherichia coli	MOD1-EC5877	B2	B2-2	GCA_002547645.1	5.14127	159	19	1	0.81957
Escherichia coli	MOD1-EC5786	B2	B2-2	GCA_002549505.1	5.13911	140	19	1	0.82312
Escherichia coli	MOD1-EC5851	B2	B2-2	GCA_002548535.1	5.1254	204	19	1	0.81687
Escherichia coli	MOD1-EC5275	B2	B2-2	GCA_002230975.1	5.10761	222	18	1	0.83217
Escherichia coli	upec-285	B2	B2-2	GCA_000777495.1	5.12142	142	19	1	0.82537
Escherichia coli	UCD-JA30	B2	B2-2	GCA_001306685.1	5.11761	81	18	1	0.81364
Escherichia coli HVH 111 (4-7039018)	HVH 111 (4-7039018)	B2	B2-2	GCA_000457555.1	4.95255	6	18	1	0.83076
Escherichia coli	MOD1-EC7009	B2	B2-2	GCA_002467845.1	5.09762	142	19	1	0.82794
Escherichia coli	1187_ECOL	B2	B2-2	GCA_001076105.1	4.98301	203	18	1	0.82306
Escherichia coli	502_ECOL	B2	B2-2	GCA_001057065.1	5.04712	164	19	1	0.8128
Escherichia coli	upec-40	B2	B2-2	GCA_000777135.1	5.00656	61	19	1	0.82208
Escherichia coli	GN05992	B2	B2-2	GCA_001621915.1	4.96124	57	19	1	0.81589
Escherichia coli	Win2012_WWKa_NEU_7	B2	B2-2	GCA_003145035.1	4.98884	168	19	1	0.81624
Escherichia coli KTE104	KTE104	B2	B2-2	GCA_000353185.1	4.97352	110	18	1	0.82104
Escherichia coli KTE189	KTE189	B2	B2-2	GCA_000350985.1	5.16617	13	18	1	0.82202
Escherichia coli TOP550-2	TOP550-2	B2	B2-2	GCA_000397445.1	5.03469	131	18	1	0.81767
Escherichia coli TOP550-4	TOP550-4	B2	B2-2	GCA_000397485.1	4.98263	120	19	1	0.82028
Escherichia coli TOP382-1	TOP382-1	B2	B2-2	GCA_000397245.1	4.94922	118	19	1	0.81205
Escherichia coli TOP550-3	TOP550-3	B2	B2-2	GCA_000397465.1	5.00922	119	19	1	0.81662
Escherichia coli TOP382-2	TOP382-2	B2	B2-2	GCA_000397265.1	5.09427	139	19	1	0.81665
Escherichia coli TOP382-3	TOP382-3	B2	B2-2	GCA_000397285.1	5.0089	138	18	1	0.81386
Escherichia coli	700416	B2	B2-2	GCA_002888445.1	5.1171	260	19	1	0.82005
Escherichia coli	MOD1-EC5095	B2	B2-2	GCA_002232455.1	5.11829	180	19	1	0.82825
Escherichia coli	700417	B2	B2-2	GCA_002888475.1	5.33319	643	19	1	0.8293
Escherichia coli	ECOR53	B2	B2-2	GCA_002189745.1	5.12967	276	18	1	0.82378
Escherichia coli HM27	HM27	B2	B2-2	GCA_000387825.2	5.16134	284	18	1	0.82303
Escherichia coli	700415	B2	B2-2	GCA_002888515.1	5.29525	355	19	1	0.82898
Escherichia coli	GN02350	B2	B2-2	GCA_001521225.1	5.25091	204	17	1	0.82595
Escherichia coli J96	J96	B2	B2-2	GCA_000295775.2	5.54089	276	18	1	0.82859
Escherichia coli	MOD1-EC5453	B2	B2-2	GCA_002230015.1	4.93349	155	0	0	0.81594
Escherichia coli UMEA 3955-1	UMEA 3955-1	B2	B2-2	GCA_000461815.1	5.41711	16	19	1	0.83504
Escherichia coli	MOD1-EC5872	B2	B2-2	GCA_002547855.1	5.2808	229	19	1	0.81804
Escherichia coli UMEA 3693-1	UMEA 3693-1	B2	B2-2	GCA_000488115.1	5.43106	17	19	1	0.82925
Escherichia coli	EC-LS	B2	B2-2	GCA_002133385.1	5.21171	158	18	1	0.8228
Escherichia coli	EC-H	B2	B2-2	GCA_002133405.1	5.26841	185	18	1	0.81935
Escherichia coli	upec-201	B2	B2-2	GCA_000779255.1	5.22746	85	19	1	0.81757
Escherichia coli KTE191	KTE191	B2	B2-2	GCA_000351005.1	5.40159	12	19	1	0.83556
Escherichia coli KTE106	KTE106	B2	B2-2	GCA_000326165.1	5.21999	132	18	1	0.82682
Escherichia coli	50639799	B2	B2-2	GCA_001463205.1	5.34461	127	19	1	0.81839
Escherichia coli HVH 143 (4-5674999)	HVH 143 (4-5674999)	B2	B2-2	GCA_000458115.1	5.20325	10	19	1	0.82647
Escherichia coli 3-105-05_S4_C2	3-105-05_S4_C2	B2	B2-2	GCA_000700145.1	5.35365	115	20	1	0.83878
Escherichia coli	MOD1-EC6736	B2	B2-2	GCA_002522355.1	5.15169	115	19	1	0.8223
Escherichia coli HVH 78 (4-2735946)	HVH 78 (4-2735946)	B2	B2-2	GCA_000457105.1	5.37182	16	19	1	0.83739
Escherichia coli KTE195	KTE195	B2	B2-2	GCA_000408125.1	5.40067	16	19	1	0.83538
Escherichia coli	MOD1-EC683	B2	B2-2	GCA_002466005.1	4.98342	111	18	1	0.81235
Escherichia coli	MOD1-EC702	B2	B2-2	GCA_002465475.1	5.15084	169	19	1	0.82294
Escherichia coli	MOD1-EC6052	B2	B2-2	GCA_002541755.1	5.20262	213	19	1	0.82729
Escherichia coli HVH 4 (4-7276109)	HVH 4 (4-7276109)	B2	B2-2	GCA_000456065.1	5.37967	15	19	1	0.82672
Escherichia coli	upec-166	B2	B2-2	GCA_000780115.1	5.388	92	19	1	0.83247
Escherichia coli	GN02137	B2	B2-2	GCA_001519675.1	5.18435	109	19	1	0.8254
Escherichia coli	MOD1-EC6762	B2	B2-2	GCA_002522085.1	5.34474	210	19	1	0.82508
Escherichia coli	MOD1-EC5093	B2	B2-2	GCA_002232615.1	4.93403	76	19	1	0.82381
Escherichia coli	GN02639	B2	B2-2	GCA_001519645.1	5.07493	206	18	1	0.82014
Escherichia coli	BIDMC116	B2	B2-2	GCA_002163275.1	5.07269	9	19	1	0.82734
Escherichia coli	265-3407	B2	B2-2	GCA_002244205.1	5.14657	9	19	1	0.82667
Escherichia coli	265-3386	B2	B2-2	GCA_002244155.1	5.17227	13	18	1	0.82805
Escherichia coli	265-3396	B2	B2-2	GCA_002244195.1	5.14278	8	19	1	0.82821
Escherichia coli	265-3446	B2	B2-2	GCA_002244235.1	5.15145	17	19	1	0.82835
Escherichia coli	GN03786	B2	B2-2	GCA_001521315.1	5.17851	212	17	1	0.83023
Escherichia coli	GN02867	B2	B2-2	GCA_001521015.1	5.07894	211	16	1	0.81953
Escherichia coli	30-398	B2	B2-2	GCA_002244925.1	5.15677	7	19	1	0.83136
Escherichia coli	YH17141	B2	B2-2	GCA_002941705.1	5.16611	99	18	1	0.82138
Escherichia coli	YH17181	B2	B2-2	GCA_002941245.1	5.12715	140	18	1	0.82046
Escherichia coli	MOD1-EC6119	B2	B2-2	GCA_002545215.1	5.11417	187	19	1	0.81861
Escherichia coli	MOD1-EC6246	B2	B2-2	GCA_002544825.1	5.25995	195	0	0	0.82494
Escherichia coli	MOD1-EC5074	B2	B2-2	GCA_002232895.1	5.31425	168	19	1	0.81939
Escherichia coli	MOD1-EC6893	B2	B2-2	GCA_002519835.1	5.08994	91	16	1	0.82159
Escherichia coli KTE219	KTE219	B2	B2-2	GCA_000408205.1	5.2207	6	0	0	0.81388
Escherichia coli KTE157	KTE157	B2	B2-2	GCA_000326745.1	5.06387	127	0	0	0.81409
Escherichia coli BIDMC 73	BIDMC 73	B2	B2-2	GCA_000692555.1	5.0762	11	0	0	0.81082
Escherichia coli	GN05128	B2	B2-2	GCA_001621385.1	5.05381	180	0	0	0.81447
Escherichia coli	GN05377	B2	B2-2	GCA_001621505.1	4.84082	244	0	0	0.80717
Escherichia coli	E-78	B2	B2-2	GCA_001652805.1	5.0274	62	0	0	0.808
Escherichia coli	UMB0900	B2	B2-2	GCA_002861245.1	5.01322	50	0	0	0.81935
Escherichia coli	upec-257	B2	B2-2	GCA_000778015.1	5.09604	77	0	0	0.80961
Escherichia coli	upec-149	B2	B2-2	GCA_000780475.1	5.11532	127	0	0	0.81052
Escherichia coli	BIDMC105	B2	B2-2	GCA_001030585.1	5.21118	13	0	0	0.813
Escherichia coli	ECPUTH03	B2	B2-2	GCA_002248995.1	5.17602	114	0	0	0.81129
Escherichia coli	1.9-R6	B2	B2-2	GCA_002001545.1	5.08718	152	0	0	0.81285
Escherichia coli BIDMC 72	BIDMC 72	B2	B2-2	GCA_000692535.1	5.08926	11	0	0	0.81411
Escherichia coli	blood-09-1545	B2	B2-2	GCA_000781835.1	5.1062	86	0	0	0.80992
Escherichia coli	MOD1-EC664	B2	B2-2	GCA_002466115.1	5.26333	238	19	1	0.82031
Escherichia coli HVH 225 (4-1273116)	HVH 225 (4-1273116)	B2	B2-2	GCA_000459495.1	5.42317	26	19	1	0.82887
Escherichia coli UMEA 3088-1	UMEA 3088-1	B2	B2-2	GCA_000460115.1	5.4458	7	19	1	0.8269
Escherichia coli HVH 107 (4-5860571)	HVH 107 (4-5860571)	B2	B2-2	GCA_000457495.1	5.36792	19	19	1	0.82589
Escherichia coli HVH 128 (4-7030436)	HVH 128 (4-7030436)	B2	B2-2	GCA_000457875.1	5.34368	16	18	1	0.82332
Escherichia coli	MOD1-EC6513	B2	B2-2	GCA_002511885.1	5.02401	169	0	0	0.8143
Escherichia coli	ECOR64	B2	B2-2	GCA_002189945.1	5.16669	519	0	0	0.82452
Escherichia coli	MOD1-EC694	B2	B2-2	GCA_002465785.1	5.12995	155	19	1	0.81297
Escherichia coli KTE57	KTE57	B2	B2-2	GCA_000351545.1	5.16825	12	19	1	0.81916
Escherichia coli UMEA 3122-1	UMEA 3122-1	B2	B2-2	GCA_000460235.1	5.18499	28	18	1	0.82771
Escherichia coli	MOD1-EC712	B2	B2-2	GCA_002465275.1	5.2385	241	19	1	0.82181
Escherichia coli HVH 26 (4-5703913)	HVH 26 (4-5703913)	B2	B2-2	GCA_000456385.1	5.32339	16	19	1	0.82335
Escherichia coli 910096-2	910096-2	B2	B2-2	GCA_000488795.1	4.99742	164	18	1	0.81119
Escherichia coli	GN06180	B2	B2-2	GCA_001622115.1	5.27844	425	17	1	0.8122
Escherichia coli	MOD1-EC725	B2	B2-2	GCA_002456425.1	5.1983	175	0	0	0.8173
Escherichia coli	10.1-R1	B2	B2-2	GCA_002002805.1	5.19663	152	0	0	0.80572
Escherichia coli KTE182	KTE182	B2	B2-2	GCA_000408065.1	5.62554	20	18	1	0.82609
Escherichia coli KTE85	KTE85	B2	B2-2	GCA_000326885.1	5.36045	173	18	1	0.82431
Escherichia coli	UC37	B2	B2-2	GCA_001571745.1	5.09665	61	18	1	0.82657
Escherichia coli	blood-08-0997	B2	B2-2	GCA_000782655.1	5.23853	100	19	1	0.81382
Escherichia coli	blood-08-1203	B2	B2-2	GCA_000782635.1	5.22796	107	19	1	0.81613
Escherichia coli	upec-258	B2	B2-2	GCA_000777975.1	5.32691	153	18	1	0.80958
Escherichia coli KTE129	KTE129	B2	B2-2	GCA_000326265.1	5.19076	136	18	1	0.81852
Escherichia coli KTE205	KTE205	B2	B2-2	GCA_000351085.1	5.368	9	19	1	0.82087
Escherichia coli	upec-77	B2	B2-2	GCA_000776155.1	5.37629	155	19	1	0.8146
Escherichia coli UMEA 3215-1	UMEA 3215-1	B2	B2-2	GCA_000460855.1	5.42016	10	19	1	0.82815
Escherichia coli HVH 213 (4-3042928)	HVH 213 (4-3042928)	B2	B2-2	GCA_000459315.1	5.44816	14	19	1	0.82435
Escherichia coli	700414	B2	B2-2	GCA_002888525.1	5.23643	204	19	1	0.82744
Escherichia coli	2.1-R1	B2	B2-2	GCA_002002465.1	5.20952	127	19	1	0.82365
Escherichia coli	GN02183	B2	B2-2	GCA_001519315.1	5.20166	117	18	1	0.81857
Escherichia coli	upec-123	B2	B2-2	GCA_000781045.1	5.27204	101	19	1	0.83005
Escherichia coli	177-2416	B2	B2-2	GCA_002244065.1	5.26634	29	19	1	0.83093
Escherichia coli	177-2189	B2	B2-2	GCA_002244015.1	5.27694	11	19	1	0.82859
Escherichia coli	upec-161	B2	B2-2	GCA_000780155.1	5.19666	76	19	1	0.82101
Escherichia coli	35.2p	B2	B2-2	GCA_002166455.1	5.13573	155	18	1	0.83238
Escherichia coli	35.1a	B2	B2-2	GCA_002166415.1	5.13784	214	18	1	0.82975
Escherichia coli	upec-135	B2	B2-2	GCA_000780795.1	5.31499	101	19	1	0.82293
Escherichia coli	upec-80	B2	B2-2	GCA_000776035.1	5.21803	96	19	1	0.81953
Escherichia coli	GN04542	B2	B2-2	GCA_001621005.1	5.23441	301	18	1	0.8178
Escherichia coli	ECONIH2	B2	B2-2	GCA_001675145.1	5.33188	3	19	1	0.82904
Escherichia coli	MOD1-EC6694	B2	B2-2	GCA_002521595.1	5.18349	127	19	1	0.8367
Escherichia coli HVH 28 (4-0907367)	HVH 28 (4-0907367)	B2	B2-2	GCA_000456425.1	5.32752	7	19	1	0.82646
Escherichia coli	upec-138	B2	B2-2	GCA_000780775.1	5.20523	88	19	1	0.82226
Escherichia coli KTE8	KTE8	B2	B2-2	GCA_000352085.1	5.14772	9	19	1	0.82995
Escherichia coli	upec-140	B2	B2-2	GCA_000780735.1	5.12979	72	19	1	0.83005
Escherichia coli	272-3695	B2	B2-2	GCA_002244295.1	5.12222	14	18	1	0.83071
Escherichia coli	272-3479	B2	B2-2	GCA_002244245.1	5.16732	8	19	1	0.83261
Escherichia coli	272-3565	B2	B2-2	GCA_002245175.1	5.1694	11	19	1	0.83054
Escherichia coli	E75	B2	B2-2	GCA_001657975.1	5.03233	463	17	1	0.80737
Escherichia coli	UMB0901	B2	B2-2	GCA_002861225.1	5.14882	31	18	1	0.83016
Escherichia coli HVH 100 (4-2850729)	HVH 100 (4-2850729)	B2	B2-2	GCA_000457405.1	5.2743	7	19	1	0.82681
Escherichia coli	MOD1-EC6044	B2	B2-2	GCA_002537845.1	5.05391	76	19	1	0.83591
Escherichia coli	upec-60	B2	B2-2	GCA_000776505.1	5.17043	102	19	1	0.82243
Escherichia coli	upec-156	B2	B2-2	GCA_000780235.1	5.15999	83	18	1	0.83142
Escherichia coli	MOD1-EC6692	B2	B2-2	GCA_002522715.1	5.12655	91	19	1	0.82953
Escherichia coli	GN03545	B2	B2-2	GCA_001520715.1	5.1117	217	17	1	0.82545
Escherichia coli F11	F11	B2	B2-2	GCA_000167835.1	5.21596	119	19	1	0.81645
Escherichia coli KOEGE 70 (185a)	KOEGE 70 (185a)	B2	B2-2	GCA_000459835.1	5.19681	15	19	1	0.82959
Escherichia coli	210-2673	B2	B2-2	GCA_002245015.1	5.1154	16	19	1	0.82413
Escherichia coli	upec-172	B2	B2-2	GCA_000779995.1	5.26047	86	19	1	0.82748
Escherichia coli	upec-228	B2	B2-2	GCA_000778815.1	4.87716	230	18	1	0.81211
Escherichia coli UMEA 3585-1	UMEA 3585-1	B2	B2-2	GCA_000461375.1	5.24423	5	19	1	0.81739
Escherichia coli	MOD1-EC5958	B2	B2-2	GCA_002544375.1	5.3269	169	19	1	0.83765
Escherichia coli	BH100 substr. MG2017	B2	B2-2	GCA_002859105.1	5.27094	3	19	1	0.82415
Escherichia coli	BH100 substr. MG2014	B2	B2-2	GCA_002763515.2	5.19446	3	19	1	0.82483
Escherichia coli KTE206	KTE206	B2	B2-2	GCA_000351105.1	5.07934	8	18	1	0.82734
Escherichia coli KTE131	KTE131	B2	B2-2	GCA_000326285.1	4.98122	100	18	1	0.82395
Escherichia coli	GN04772	B2	B2-2	GCA_001621225.1	5.0488	149	19	1	0.80914
Escherichia coli	upec-226	B2	B2-2	GCA_000778685.1	5.15308	91	19	1	0.82589
Escherichia coli UMEA 3617-1	UMEA 3617-1	B2	B2-2	GCA_000461435.1	5.19768	22	19	1	0.82934
Escherichia coli	MOD1-EC709	B2	B2-2	GCA_002465325.1	5.04733	140	19	1	0.82888
Escherichia coli	Ec37	B2	B2-2	GCA_002895365.1	5.08599	54	18	1	0.82417
Escherichia coli	2009-46	B2	B2-2	GCA_000696545.1	5.13923	89	18	1	0.82609
Escherichia coli	upec-36	B2	B2-2	GCA_000777215.1	5.30545	183	19	1	0.82304
Escherichia coli	MOD1-EC6209	B2	B2-2	GCA_002536805.1	5.20252	160	19	1	0.81422
Escherichia coli 7996-1	7996-1	B2	B2-2	GCA_000699365.1	5.30856	83	18	1	0.81889
Escherichia coli	GN03398	B2	B2-2	GCA_001519485.1	5.23858	199	18	1	0.81556
Escherichia coli UMEA 3341-1	UMEA 3341-1	B2	B2-2	GCA_000461295.1	5.07385	12	19	1	0.8235
Escherichia coli	UMB0727	B2	B2-2	GCA_002861205.1	5.12489	32	18	1	0.82545
Escherichia coli	317	B2	B2-2	GCA_002310575.1	5.13591	2	19	1	0.81522
Escherichia coli	upec-91	B2	B2-2	GCA_000776855.1	5.28966	114	19	1	0.82669
Escherichia coli UMEA 3097-1	UMEA 3097-1	B2	B2-2	GCA_000460135.1	5.23075	8	19	1	0.82387
Escherichia coli	932_ECOL	B2	B2-2	GCA_001059575.1	4.95811	215	18	1	0.82073
Escherichia coli UMEA 3022-1	UMEA 3022-1	B2	B2-2	GCA_000459975.1	5.08441	10	19	1	0.83001
Escherichia coli	K56-16	B2	B2-2	GCA_002810025.1	4.99223	63	19	1	0.8189
Escherichia coli UMEA 3217-1	UMEA 3217-1	B2	B2-2	GCA_000460895.1	5.05304	7	19	1	0.82463
Escherichia coli	323-3993	B2	B2-2	GCA_002244455.1	5.0442	5	19	1	0.82764
Escherichia coli	323-4041	B2	B2-2	GCA_002244315.1	5.04216	3	19	1	0.82743
Escherichia coli	323-4035	B2	B2-2	GCA_002244275.1	5.03806	8	19	1	0.82742
Escherichia coli	MOD1-EC5861	B2	B2-2	GCA_002548255.1	4.79879	61	19	1	0.81452
Escherichia coli 536	536	B2	B2-2	GCA_000013305.1	4.93892	1	19	1	0.82576
Escherichia coli UMEA 3426-1	UMEA 3426-1	B2	B2-2	GCA_000488075.1	5.15622	12	19	1	0.83296
Escherichia coli	upec-84	B2	B2-2	GCA_000776215.1	5.14063	152	19	1	0.81839
Escherichia coli	upec-225	B2	B2-2	GCA_000778955.1	5.14786	83	19	1	0.8113
Escherichia coli	upec-186	B2	B2-2	GCA_000779585.1	5.06501	90	19	1	0.81512
Escherichia coli KOEGE 30 (63a)	KOEGE 30 (63a)	B2	B2-2	GCA_000459615.1	5.2088	12	19	1	0.84214
Escherichia coli	21.1a	B2	B2-2	GCA_002166175.1	4.99121	195	18	1	0.82621
Escherichia coli	21.2p	B2	B2-2	GCA_002166185.1	4.99075	186	18	1	0.82213
Escherichia coli	21.3r	B2	B2-2	GCA_002166235.1	4.99438	161	18	1	0.82646
Escherichia coli UMEA 3113-1	UMEA 3113-1	B2	B2-2	GCA_000460175.1	5.13255	13	19	1	0.83635
Escherichia coli KOEGE 58 (171a)	KOEGE 58 (171a)	B2	B2-2	GCA_000459755.1	5.11415	15	19	1	0.83912
Escherichia coli A35218R	A35218R	B2	B2-2	GCA_000488835.1	5.02434	103	18	1	0.82607
Escherichia coli	11_ECOL	B2	B2-2	GCA_001052125.1	5.12053	154	18	1	0.81346
Escherichia coli	MOD1-EC5193	B2	B2-2	GCA_002230855.1	5.0324	168	19	1	0.8197
Escherichia coli HVH 185 (4-2876639)	HVH 185 (4-2876639)	B2	B2-2	GCA_000458765.1	5.21363	11	19	1	0.82981
Escherichia coli HVH 112 (4-5987253)	HVH 112 (4-5987253)	B2	B2-2	GCA_000457575.1	5.07966	17	19	1	0.82665
Escherichia coli UMEA 3290-1	UMEA 3290-1	B2	B2-2	GCA_000488095.1	5.07592	7	19	1	0.83635
Escherichia coli	upec-277	B2	B2-2	GCA_000777605.1	5.04652	132	19	1	0.81843
Escherichia coli HVH 56 (4-2153033)	HVH 56 (4-2153033)	B2	B2-2	GCA_000456845.1	5.01882	9	19	1	0.82629
Escherichia coli	20.1a	B2	B2-2	GCA_002166075.1	4.98491	173	18	1	0.82917
Escherichia coli	20.2r	B2	B2-2	GCA_002166135.1	4.98097	167	18	1	0.82357
Escherichia coli	20.3r	B2	B2-2	GCA_002166115.1	4.97708	245	18	1	0.82578
Escherichia coli	BH100L substr. MG2017	B2	B2-2	GCA_002887715.1	5.03321	1	19	1	0.82172
Escherichia coli	BH100N substr. MG2017	B2	B2-2	GCA_002900305.1	5.11603	1	18	1	0.82251
Escherichia coli	K-15KW01	B2	B2-2	GCA_001683435.1	5.15464	1	19	1	0.8291
Escherichia coli HVH 158 (4-3224287)	HVH 158 (4-3224287)	B2	B2-2	GCA_000458375.1	5.00683	6	0	0	0.80886
Escherichia coli HVH 194 (4-2356805)	HVH 194 (4-2356805)	B2	B2-2	GCA_000458935.1	5.24173	7	0	0	0.81969
Escherichia coli	MOD1-EC6582	B2	B2-2	GCA_002469015.1	5.18222	234	0	0	0.80619
Escherichia coli	GN03496	B2	B2-2	GCA_001520735.1	5.10404	255	0	0	0.81773
Escherichia coli	upec-179	B2	B2-2	GCA_000779835.1	5.01105	85	0	0	0.81047
Escherichia coli	AR_0017	B2	B2-2	GCA_002796585.1	5.13947	2	0	0	0.81281
Escherichia coli KOEGE 10 (25a)	KOEGE 10 (25a)	B2	B2-2	GCA_000459595.1	5.43311	17	0	0	0.82182
Escherichia coli	GN02050	B2	B2-2	GCA_001519435.1	5.10831	211	0	0	0.81397
Escherichia coli	MOD1-EC5863	B2	B2-2	GCA_002545805.1	4.97307	132	0	0	0.80804
Escherichia coli	MOD1-EC666	B2	B2-2	GCA_002456705.1	5.27023	206	0	0	0.8083
Escherichia coli HVH 175 (4-3405184)	HVH 175 (4-3405184)	B2	B2-2	GCA_000458645.1	5.49079	21	0	0	0.82812
Escherichia coli	GN02175	B2	B2-2	GCA_001519365.2	5.25491	6	0	0	0.80578
Escherichia coli HVH 184 (4-3343286)	HVH 184 (4-3343286)	B2	B2-2	GCA_000458745.1	5.42684	23	0	0	0.81762
Escherichia coli	MOD1-EC706	B2	B2-2	GCA_002465385.1	5.26515	216	0	0	0.81907
Escherichia coli	MOD1-EC668	B2	B2-2	GCA_002465925.1	5.16729	174	0	0	0.81807
Escherichia coli HVH 70 (4-2963531)	HVH 70 (4-2963531)	B2	B2-2	GCA_000457005.1	5.56988	23	0	0	0.8211
Escherichia coli	MOD1-EC6734	B2	B2-2	GCA_002522395.1	5.4359	206	0	0	0.81899
Escherichia coli	152	B2	B2-2	GCA_001419885.1	4.98423	239	0	0	0.80911
Escherichia coli 2-005-03_S4_C3	2-005-03_S4_C3	B2	B2-2	GCA_000627075.1	5.2466	241	0	0	0.80836
Escherichia coli 2-052-05_S4_C1	2-052-05_S4_C1	B2	B2-2	GCA_000700545.1	5.30248	178	0	0	0.80899
Escherichia coli O81:NM str. 02-3012	02-3012	B2	B2-2	GCA_000617145.2	5.17596	196	0	0	0.79232
Escherichia coli KTE186	KTE186	B2	B2-2	GCA_000408105.1	5.28408	20	0	0	0.80955
Escherichia coli ED1a	ED1a	B2	B2-2	GCA_000026305.1	5.20955	1	0	0	0.80937
Escherichia coli	MOD1-EC6754	B2	B2-2	GCA_002522185.1	5.08232	206	0	0	0.80297
Escherichia coli	E. coli	B2	B2-2	GCA_000752415.1	5.20477	212	0	0	0.80822
Escherichia coli	E. coli	B2	B2-2	GCA_000753415.1	5.14183	334	0	0	0.8151
Escherichia coli	FHI72	B2	B2-2	GCA_000939255.1	5.29712	42	0	0	0.81543
Escherichia coli	E. coli	B2	B2-2	GCA_000752555.1	5.03543	222	0	0	0.80904
Escherichia coli	STEC 2564	B2	B2-2	GCA_001607515.1	4.97968	236	0	0	0.80621
Escherichia coli	MOD1-EC6382	B2	B2-2	GCA_002513855.1	4.9818	360	0	0	0.79992
Escherichia coli	57A_A8	B2	B2-2	GCA_000941195.1	5.38078	729	0	0	0.79915
Escherichia coli	4e8A	B2	B2-2	GCA_000947375.1	5.46083	1348	0	0	0.79398
Escherichia coli	2d8A	B2	B2-2	GCA_000941535.1	5.23247	958	0	0	0.79332
Escherichia coli HVH 38 (4-2774682)	HVH 38 (4-2774682)	B2	B2-2	GCA_000456585.1	5.30512	16	19	1	0.82291
Escherichia coli	SCB11	B2	B2-2	GCA_000817375.1	5.1055	74	18	1	0.82495
Escherichia coli KTE168	KTE168	B2	B2-2	GCA_000326445.1	5.0994	96	18	1	0.82346
Escherichia coli KTE224	KTE224	B2	B2-2	GCA_000351265.1	5.33409	13	19	1	0.82392
Escherichia coli KTE169	KTE169	B2	B2-2	GCA_000352025.1	5.25622	13	18	1	0.82307
Escherichia coli H223	H223	B2	B2-2	GCA_002110555.1	5.1325	79	18	1	0.82409
Escherichia coli	E. coli	B2	B2-2	GCA_000753195.1	5.12103	89	18	1	0.81582
Escherichia coli KTE72	KTE72	B2	B2-2	GCA_000351665.1	5.21955	15	18	1	0.8166
Escherichia coli UMEA 3391-1	UMEA 3391-1	B2	B2-2	GCA_000461335.1	5.23245	9	18	1	0.82222
Escherichia coli HM65	HM65	B2	B2-2	GCA_000387785.2	5.15684	75	7	0	0.82264
Escherichia coli KTE88	KTE88	B2	B2-2	GCA_000326625.1	4.95666	104	18	1	0.82179
Escherichia coli KTE89	KTE89	B2	B2-2	GCA_000408505.1	5.09338	11	19	1	0.82363
Escherichia coli KTE86	KTE86	B2	B2-2	GCA_000351805.1	5.09771	15	19	1	0.82381
Escherichia coli KTE183	KTE183	B2	B2-2	GCA_000352905.1	5.12037	5	19	1	0.82408
Escherichia coli KTE93	KTE93	B2	B2-2	GCA_000351845.1	5.07707	10	19	1	0.82353
Escherichia coli KTE145	KTE145	B2	B2-2	GCA_000326705.1	4.92547	92	18	1	0.82599
Escherichia coli KTE215	KTE215	B2	B2-2	GCA_000353065.1	5.06599	9	19	1	0.82769
Escherichia coli	PairA_hh_2	B2	B2-2	GCA_003024275.1	4.93567	23	0	0	0.80376
Escherichia coli	PairA_ch_2	B2	B2-2	GCA_003024315.1	5.11351	37	0	0	0.80996
Escherichia coli	PairA_ch_1	B2	B2-2	GCA_003024305.1	5.06307	33	0	0	0.81062
Escherichia coli	PairA_hh_1	B2	B2-2	GCA_003024355.1	5.06646	31	0	0	0.80539
Escherichia coli	blood-09-0829	B2	B2-2	GCA_000781965.1	5.30003	63	0	0	0.82395
Escherichia coli	blood-09-0856	B2	B2-2	GCA_000781995.1	5.29844	68	0	0	0.81979
Escherichia coli KTE113	KTE113	B2	B2-2	GCA_000326585.1	5.02616	87	0	0	0.81916
Escherichia coli KTE194	KTE194	B2	B2-2	GCA_000352805.1	5.15605	9	0	0	0.82191
Escherichia coli	1512290026	B2	B2-2	GCA_001692785.1	5.00544	2	19	1	0.8133
Escherichia coli	Mt1B1	B2	B2-2	GCA_003052625.1	5.17828	2	19	1	0.81358
Escherichia coli NC101	NC101	B2	B2-2	GCA_000179795.1	5.02114	27	19	1	0.81366
Escherichia coli	NGF4	B2	B2-2	GCA_001683575.1	5.03918	89	19	1	0.82456
Escherichia coli	NGF3	B2	B2-2	GCA_001683585.1	5.04115	57	19	1	0.82171
Escherichia coli	NGF1	B2	B2-2	GCA_001660585.1	5.07482	3	19	1	0.81587
Escherichia coli	NGF2	B2	B2-2	GCA_001683595.1	5.03887	48	19	1	0.81475
Escherichia coli 9.1649	9.1649	B2	B2-2	GCA_000194475.2	5.10836	30	19	1	0.81868
Escherichia coli KTE43	KTE43	B2	B2-2	GCA_000352225.1	5.04442	5	19	1	0.8166
Escherichia coli	MOD1-EC6244	B2	B2-2	GCA_002535085.1	5.07217	68	19	1	0.83373
Escherichia coli KTE133	KTE133	B2	B2-2	GCA_000326305.1	4.98354	66	18	1	0.81864
Escherichia coli KTE207	KTE207	B2	B2-2	GCA_000353005.1	5.04716	6	19	1	0.81931
Escherichia coli	MOD1-EC5941	B2	B2-2	GCA_002544635.1	5.09256	92	19	1	0.81929
Escherichia coli	MOD1-EC5080	B2	B2-2	GCA_002232975.1	5.13191	103	19	1	0.81832
Escherichia coli KTE15	KTE15	B2	B2-2	GCA_000350745.1	5.25386	13	19	1	0.82622
Escherichia coli	chicken fecal	B2	B2-2	GCA_001269285.1	5.23851	80	18	1	0.82774
Escherichia coli	PSUO2	B2	B2-2	GCA_002215095.1	5.03526	2	0	0	0.81163
Escherichia coli	1408270010	B2	B2-2	GCA_001692865.1	5.31802	5	19	1	0.81969
Escherichia coli	1512290008	B2	B2-2	GCA_001692805.1	5.28966	3	19	1	0.82446
Escherichia coli	1409150006	B2	B2-2	GCA_001692775.1	5.29296	3	19	1	0.81927
Escherichia coli	HT2012087	B2	B2-2	GCA_002972935.1	5.25929	57	0	0	0.8185
Escherichia coli	M17 - 1	B2	B2-2	GCA_001010195.1	5.10519	42	18	1	0.81564
Escherichia coli KTE16	KTE16	B2	B2-2	GCA_000350765.1	5.20687	13	19	1	0.81928
Escherichia coli	ST-998:E035	B2	B2-2	GCA_002416955.1	5.09571	181	18	1	0.81238
Escherichia coli	K091	B2	B2-2	GCA_002510125.1	5.08304	93	14	1	0.81669
Escherichia coli	MOD1-EC711	B2	B2-2	GCA_002465265.1	5.04004	95	19	1	0.81364
Escherichia coli	UCD-JA19	B2	B2-2	GCA_001306585.1	5.20045	63	18	1	0.81775
Escherichia coli	MOD1-EC6821	B2	B2-2	GCA_002468365.1	5.25959	69	19	1	0.83466
Escherichia coli	Fec 67	B2	B2-2	GCA_001865185.1	5.18304	51	19	1	0.80698
Escherichia coli	MOD1-EC6868	B2	B2-2	GCA_002520265.1	5.13466	159	19	1	0.81779
Escherichia coli	26.3r	B2	B2-2	GCA_002166255.1	5.20641	891	18	1	0.82377
Escherichia coli	26.2p	B2	B2-2	GCA_002166285.1	5.20731	209	18	1	0.824
Escherichia coli	26.1a	B2	B2-2	GCA_002166275.1	5.20911	192	18	1	0.82399
Escherichia coli	MOD1-EC5160	B2	B2-2	GCA_002474935.1	5.24851	259	19	1	0.82872
Escherichia coli	MOD1-EC6946	B2	B2-2	GCA_002519335.1	5.36669	174	19	1	0.82105
Escherichia coli	MOD1-EC6121	B2	B2-2	GCA_002537485.1	5.15617	81	19	1	0.81831
Escherichia coli	MOD1-EC5196	B2	B2-2	GCA_002231695.1	5.06675	213	18	1	0.82096
Escherichia coli	MOD1-EC707	B2	B2-2	GCA_002465355.1	5.05475	166	19	1	0.8183
Escherichia coli	MOD1-EC6825	B2	B2-2	GCA_002468325.1	5.06598	96	19	1	0.81991
Escherichia coli	upec-180	B2	B2-2	GCA_000779815.1	5.31882	116	0	0	0.8266
Escherichia coli	1105	B2	B2-2	GCA_002310635.1	5.13375	2	0	0	0.82088
Escherichia coli KTE94	KTE94	B2	B2-2	GCA_000326525.1	5.08956	122	0	0	0.82525
Escherichia coli	MOD1-EC5874	B2	B2-2	GCA_002545635.1	5.05626	119	0	0	0.81168
Escherichia coli KTE185	KTE185	B2	B2-2	GCA_000408085.1	5.2733	11	0	0	0.82708
Escherichia coli	41.3r	B2	B2-2	GCA_002166525.1	5.05241	766	0	0	0.82381
Escherichia coli	41.1a	B2	B2-2	GCA_002166465.1	5.04369	176	0	0	0.82528
Escherichia coli	41.2p	B2	B2-2	GCA_002166505.1	5.05443	165	0	0	0.82246
Escherichia coli	MOD1-EC5141	B2	B2-2	GCA_002516745.1	5.43207	235	19	1	0.82521
Escherichia coli	MOD1-EC5088	B2	B2-2	GCA_002232675.1	5.36724	194	19	1	0.81961
Escherichia coli HVH 153 (3-9344314)	HVH 153 (3-9344314)	B2	B2-2	GCA_000458275.1	5.3033	14	0	0	0.82739
Escherichia coli HVH 46 (4-2758776)	HVH 46 (4-2758776)	B2	B2-2	GCA_000456745.1	5.25758	18	0	0	0.82192
Escherichia coli	HT2012031	B2	B2-2	GCA_002972405.1	5.2928	89	18	1	0.83015
Escherichia coli	MOD1-EC5138	B2	B2-2	GCA_002475105.1	5.20888	152	19	1	0.82824
Escherichia coli UMEA 3160-1	UMEA 3160-1	B2	B2-2	GCA_000460435.1	5.17478	12	0	0	0.83296
Escherichia coli	upec-184	B2	B2-2	GCA_000779715.1	5.11556	60	19	1	0.81503
Escherichia coli	FHI23	B2	B2-2	GCA_000937855.1	5.66007	46	0	0	0.83139
Escherichia coli	MOD1-EC6428	B2	B2-2	GCA_002513605.1	5.03524	175	0	0	0.82183
Escherichia coli	MOD1-EC6506	B2	B2-2	GCA_002511935.1	4.93941	133	0	0	0.81468
Escherichia coli	MOD1-EC6434	B2	B2-2	GCA_002486805.1	4.97904	119	0	0	0.82536
Escherichia coli	MOD1-EC6438	B2	B2-2	GCA_002510785.1	5.03229	101	0	0	0.81718
Escherichia coli	MOD1-EC6439	B2	B2-2	GCA_002512195.1	5.02603	82	0	0	0.8147
Escherichia coli	upec-112	B2	B2-2	GCA_000781295.1	5.09494	65	0	0	0.81215
Escherichia coli	95-3322	B2	B2-2	GCA_003019095.1	5.09522	1	0	0	0.81403
Escherichia coli	MOD1-EC5916	B2	B2-2	GCA_002534905.1	5.20807	96	19	1	0.82503
Escherichia coli	MOD1-EC6942	B2	B2-2	GCA_002519415.1	5.32584	196	19	1	0.818
Escherichia coli	Aut2013_WWKa_OUT_20	B2	B2-2	GCA_003146275.1	4.91442	156	18	1	0.82078
Escherichia coli	MOD1-EC5825	B2	B2-2	GCA_002548945.1	4.85442	78	0	0	0.82758
Escherichia coli	MOD1-EC6185	B2	B2-2	GCA_002546815.1	5.29502	108	19	1	0.8138
Escherichia coli	MOD1-EC6892	B2	B2-2	GCA_002519865.1	5.20977	184	0	0	0.81522
Escherichia coli	PairB_hh_1	B2	B2-2	GCA_003024375.1	5.15182	124	19	1	0.82947
Escherichia coli	PairB_ch_2	B2	B2-2	GCA_003024295.1	5.15467	127	19	1	0.83243
Escherichia coli	PairB_ch_1	B2	B2-2	GCA_003024395.1	5.15527	125	19	1	0.83116
Escherichia coli	ECOR63	B2	B2-2	GCA_002189905.1	5.10824	308	18	1	0.81741
Escherichia coli	E. coli	B2	B2-2	GCA_000753035.1	5.07043	61	18	1	0.81516
Escherichia coli	STEC 1528	B2	B2-2	GCA_001608125.1	5.11645	82	18	1	0.81504
Escherichia coli UMEA 3230-1	UMEA 3230-1	B2	B2-2	GCA_000460975.1	5.20574	13	19	1	0.8325
Escherichia coli UMEA 3221-1	UMEA 3221-1	B2	B2-2	GCA_000460935.1	5.24634	11	19	1	0.83177
Escherichia coli HVH 125 (4-2634716)	HVH 125 (4-2634716)	B2	B2-2	GCA_000457815.1	5.24356	14	19	1	0.83229
Escherichia coli KOEGE 56 (169a)	KOEGE 56 (169a)	B2	B2-2	GCA_000459735.1	5.26868	23	19	1	0.83561
Escherichia coli	MOD1-EC6293	B2	B2-2	GCA_002512805.1	4.93353	76	18	1	0.81165
Escherichia coli	UCI122	B2	B2-2	GCA_002152255.1	5.11339	6	19	1	0.82154
Escherichia coli	MOD1-EC6167	B2	B2-2	GCA_002535895.1	4.92099	90	19	1	0.82182
Escherichia coli	MOD1-EC6186	B2	B2-2	GCA_002544965.1	5.06141	78	17	1	0.81362
Escherichia coli	blood-10-1308	B2	B2-2	GCA_000778915.1	5.46408	152	19	1	0.82702
Escherichia coli	blood-10-1310	B2	B2-2	GCA_000778765.1	5.57272	91	19	1	0.81283
Escherichia coli TA464	TA464	B2	B2-2	GCA_002109865.1	5.10934	36	0	0	0.82921
Escherichia coli	HT2012092	B2	B2-2	GCA_002972245.1	5.40376	188	0	0	0.83012
Escherichia coli HVH 55 (4-2646161)	HVH 55 (4-2646161)	B2	B2-2	GCA_000456825.1	5.30937	5	19	1	0.8318
Escherichia coli	MOD1-EC5277	B2	B2-2	GCA_002516935.1	5.12185	121	19	1	0.82261
Escherichia coli	MGH170	B2	B2-2	GCA_002152145.1	5.13327	7	18	1	0.82642
Escherichia coli	K56-70	B2	B2-2	GCA_002810085.1	5.22137	112	19	1	0.82079
Escherichia coli UMEA 3053-1	UMEA 3053-1	B2	B2-2	GCA_000460055.1	5.20248	16	19	1	0.83758
Escherichia coli	upec-195	B2	B2-2	GCA_000779515.1	4.78595	53	0	0	0.81398
Escherichia coli	PAR	B2	B2-2	GCA_002237305.1	4.85974	1	0	0	0.81808
Escherichia coli	MOD1-EC6120	B2	B2-2	GCA_002547055.1	4.81444	50	0	0	0.81027
Escherichia coli	YDC736-1	B2	B2-2	GCA_002886285.1	4.84244	62	0	0	0.80812
Escherichia coli	MOD1-EC6343	B2	B2-2	GCA_002514095.1	5.20091	231	0	0	0.81424
Escherichia coli	MOD1-EC6055	B2	B2-2	GCA_002541735.1	4.98123	70	0	0	0.80086
Escherichia coli	MOD1-EC6054	B2	B2-2	GCA_002537735.1	4.98145	70	0	0	0.80798
Escherichia coli	upec-87	B2	B2-2	GCA_000776745.1	5.07369	69	19	1	0.81505
Escherichia coli	YD509	B2	B2-2	GCA_002886765.1	4.8096	84	19	1	0.81975
Escherichia coli	92-1449	B2	B2-2	GCA_002244655.1	4.83021	12	19	1	0.81919
Escherichia coli	92-1246	B2	B2-2	GCA_002244575.1	4.85295	7	19	1	0.81971
Escherichia coli	92-1405	B2	B2-2	GCA_002244595.1	4.84184	11	19	1	0.82023
Escherichia coli	92-1295	B2	B2-2	GCA_002244605.1	4.84388	12	19	1	0.81987
Escherichia coli	92-1476	B2	B2-2	GCA_002244695.1	4.84672	5	19	1	0.81889
Escherichia coli	GN03661	B2	B2-2	GCA_001521115.1	5.0795	183	18	1	0.80917
Escherichia coli	GN02289	B2	B2-2	GCA_001521215.1	4.85447	178	16	1	0.80825
Escherichia coli	GN02314	B2	B2-2	GCA_001521195.1	4.80569	207	16	1	0.81771
Escherichia coli	236-3023	B2	B2-2	GCA_002245085.1	4.6321	4	0	0	0.80853
Escherichia coli	GN02317	B2	B2-2	GCA_001519855.1	4.97322	244	0	0	0.81818
Escherichia coli	upec-100	B2	B2-2	GCA_000779215.1	4.69988	65	0	0	0.80046
Escherichia coli	HT2012049	B2	B2-2	GCA_002971755.1	5.37662	247	0	0	0.82167
Escherichia coli	HT2012DB15	B2	B2-2	GCA_002971705.1	5.13739	121	0	0	0.82328
Escherichia coli	HT2012ST02	B2	B2-2	GCA_002971295.1	5.23255	111	0	0	0.82083
Escherichia coli	HT2012160	B2	B2-2	GCA_002972845.1	5.22164	244	0	0	0.81567
Escherichia coli	HT2012166	B2	B2-2	GCA_002972835.1	5.30245	130	0	0	0.8184
Escherichia coli	HT2012050	B2	B2-2	GCA_002972145.1	5.31727	114	0	0	0.82338
Escherichia coli	HT2012057	B2	B2-2	GCA_002972955.1	5.27865	113	0	0	0.81922
Escherichia coli	HT2012DB13	B2	B2-2	GCA_002971635.1	5.27469	122	0	0	0.82094
Escherichia coli	upec-243	B2	B2-2	GCA_000778235.1	5.02699	79	0	0	0.82414
Escherichia coli	MOD1-EC5295	B2	B2-2	GCA_002517245.1	4.58478	39	0	0	0.79248
Escherichia coli	MOD1-EC6025	B2	B2-2	GCA_002542435.1	4.99529	62	0	0	0.8073
Escherichia coli	MOD1-EC6088	B2	B2-2	GCA_002541025.1	5.27081	190	0	0	0.81657
Escherichia coli	455_ECOL	B2	B2-2	GCA_001056845.1	4.7645	57	0	0	0.80801
Escherichia coli	35-490	B2	B2-2	GCA_002243745.1	4.75657	6	0	0	0.8086
Escherichia coli UMEA 3117-1	UMEA 3117-1	B2	B2-2	GCA_000460195.1	4.81848	7	0	0	0.80349
Escherichia coli	upec-101	B2	B2-2	GCA_000779055.1	4.7989	26	0	0	0.81201
Escherichia coli	upec-208	B2	B2-2	GCA_000778565.1	4.79665	36	0	0	0.79724
Escherichia coli KTE45	KTE45	B2	B2-2	GCA_000352165.1	4.86063	3	0	0	0.80857
Escherichia coli KTE46	KTE46	B2	B2-2	GCA_000352285.1	4.87853	4	0	0	0.80772
Escherichia coli	ECG28	B2	B2-2	GCA_900130185.1	4.98436	495	0	0	0.80969
Escherichia coli	AIEC17	B2	B2-2	GCA_900130175.1	4.96119	428	0	0	0.80836
Escherichia coli	blood-09-0767	B2	B2-2	GCA_000782035.1	4.89249	53	0	0	0.80363
Escherichia coli	25	B2	B2-2	GCA_002080495.1	4.93675	13	0	0	0.81062
Escherichia coli	26	B2	B2-2	GCA_002080685.1	4.91875	111	0	0	0.81559
Escherichia coli	5	B2	B2-2	GCA_002080595.1	4.90739	90	0	0	0.81249
Escherichia coli	76-972	B2	B2-2	GCA_002244045.1	4.94707	13	0	0	0.80501
Escherichia coli	upec-59	B2	B2-2	GCA_000776675.1	4.6303	30	0	0	0.80214
Escherichia coli	136-1758	B2	B2-2	GCA_002244745.1	5.28213	7	0	0	0.80568
Escherichia coli SCI-07	SCI-07	B2	B2-2	GCA_000252805.1	4.97233	68	0	0	0.81371
Escherichia coli HVH 198 (4-3206106)	HVH 198 (4-3206106)	B2	B2-2	GCA_000459015.1	5.0938	12	0	0	0.80811
Escherichia coli	OS_09_001_TOC1	B2	B2-2	GCA_002087505.1	5.19403	9	0	0	0.81442
Escherichia coli 908519	908519	B2	B2-2	GCA_000488495.1	5.25181	179	0	0	0.81621
Escherichia coli	225-2935	B2	B2-2	GCA_002245075.1	5.17366	24	0	0	0.80973
Escherichia coli MRSN 10204	MRSN 10204	B2	B2-2	GCA_000982035.1	5.11161	68	0	0	0.80324
Escherichia coli	12_ECOL	B2	B2-2	GCA_001052935.1	4.7412	45	0	0	0.79968
Escherichia coli	MOD1-EC5867	B2	B2-2	GCA_002548095.1	4.72763	52	0	0	0.79525
Escherichia coli	upec-128	B2	B2-2	GCA_000780915.1	4.81967	40	0	0	0.7919
Escherichia coli	MOD1-EC5478	B2	B2-2	GCA_002230395.1	4.6524	49	0	0	0.79314
Escherichia coli LF82	LF82	B2	B2-2	GCA_000284495.1	4.77311	1	0	0	0.80302
Escherichia coli	MOD1-EC6046	B2	B2-2	GCA_002542015.1	4.80575	53	0	0	0.80047
Escherichia coli O83:H1 str. NRG 857C	NRG 857C	B2	B2-2	GCA_000183345.1	4.89488	2	0	0	0.80837
Escherichia coli	HMLN-1	B2	B2-2	GCA_001077955.1	4.86833	48	0	0	0.80508
Escherichia coli	MOD1-EC6433	B2	B2-2	GCA_002486825.1	4.77655	96	0	0	0.80065
Escherichia coli	5.1-R1	B2	B2-2	GCA_002002225.1	4.70291	45	0	0	0.80957
Escherichia coli	upec-89	B2	B2-2	GCA_000776635.1	4.90592	42	0	0	0.79427
Escherichia coli	upec-266	B2	B2-2	GCA_000777815.1	4.99194	88	0	0	0.80588
Escherichia coli	upec-70	B2	B2-2	GCA_000776815.1	4.92383	54	0	0	0.8005
Escherichia coli	MOD1-EC5468	B2	B2-2	GCA_002230055.1	5.20484	191	0	0	0.81621
Escherichia coli	MOD1-EC6843	B2	B2-2	GCA_002520715.1	4.92303	111	0	0	0.81406
Escherichia coli HVH 9 (4-6942539)	HVH 9 (4-6942539)	B2	B2-2	GCA_000456145.1	4.89831	6	0	0	0.8139
Escherichia coli	MOD1-EC6529	B2	B2-2	GCA_002510435.1	4.99864	78	0	0	0.80375
Escherichia coli APEC O2	APEC O2	B2	B2-2	GCA_001620375.1	4.90882	260	0	0	0.79648
Escherichia coli	MOD1-EC6891	B2	B2-2	GCA_002519875.1	4.83885	82	0	0	0.81127
Escherichia coli	MOD1-EC5432	B2	B2-2	GCA_002517495.1	4.82946	53	0	0	0.80007
Escherichia coli	UPEC_005	B2	B2-2	GCA_001651635.1	4.84981	71	0	0	0.80378
Escherichia coli	50664179	B2	B2-2	GCA_001463115.1	5.00669	131	0	0	0.80822
Escherichia coli	upec-107	B2	B2-2	GCA_000781375.1	4.9673	108	0	0	0.81697
Escherichia coli	UM128	B2	B2-2	GCA_001571725.1	4.80201	63	0	0	0.79943
Escherichia coli	HT2012135	B2	B2-2	GCA_002972735.1	5.09349	151	0	0	0.80835
Escherichia coli	MOD1-EC5947	B2	B2-2	GCA_002539495.1	4.86694	109	0	0	0.80794
Escherichia coli	MOD1-EC5461	B2	B2-2	GCA_002230575.1	4.89787	80	0	0	0.81529
Escherichia coli TA206	TA206	B2	B2-2	GCA_000176595.2	5.12224	38	0	0	0.82076
Escherichia coli	MOD1-EC5099	B2	B2-2	GCA_002232235.1	4.77682	55	0	0	0.8127
Escherichia coli KTE192	KTE192	B2	B2-2	GCA_000352785.1	4.77459	5	0	0	0.81298
Escherichia coli KTE109	KTE109	B2	B2-2	GCA_000326185.1	4.72278	52	0	0	0.81394
Escherichia coli	11984-2-1	B2	B2-2	GCA_003185685.1	4.81552	78	0	0	0.80588
Escherichia coli UMEA 3656-1	UMEA 3656-1	B2	B2-2	GCA_000461475.1	5.07843	14	0	0	0.82477
Escherichia coli GSK2022	GSK2022	B2	B2-2	GCA_000500835.1	4.44077	248	0	0	0.79691
Escherichia coli GSK202U	GSK202U	B2	B2-2	GCA_000500815.1	4.43922	276	0	0	0.79676
Escherichia coli GSK202B	GSK202B	B2	B2-2	GCA_000500895.1	4.4416	267	0	0	0.79718
Escherichia coli GSK2024	GSK2024	B2	B2-2	GCA_000500875.1	4.44076	255	0	0	0.7969
Escherichia coli GSK2023	GSK2023	B2	B2-2	GCA_000500855.1	4.44245	243	0	0	0.79716
Escherichia coli	upec-45	B2	B2-2	GCA_000777065.1	4.9512	54	0	0	0.80897
Escherichia coli	YS river water	B2	B2-2	GCA_001268365.1	4.87088	42	0	0	0.81009
Escherichia coli H588	H588	B2	B2-2	GCA_002109645.1	4.72779	15	0	0	0.8031
Escherichia coli	6-121	B2	B2-2	GCA_002244335.1	4.97801	5	0	0	0.80574
Escherichia coli	6-171	B2	B2-2	GCA_002244355.1	4.9596	3	0	0	0.80611
Escherichia coli	MOD1-EC6691	B2	B2-2	GCA_002522735.1	4.85409	57	0	0	0.79081
Escherichia coli	MOD1-EC6058	B2	B2-2	GCA_002545315.1	4.90204	103	0	0	0.80688
Escherichia coli	MOD1-EC6056	B2	B2-2	GCA_002541635.1	4.90586	121	0	0	0.80919
Escherichia coli	MOD1-EC5783	B2	B2-2	GCA_002535045.1	4.74131	64	0	0	0.80954
Escherichia coli	MOD1-EC6424	B2	B2-2	GCA_002512275.1	5.24088	118	0	0	0.81882
Escherichia coli	MOD1-EC6423	B2	B2-2	GCA_002510815.1	5.06809	120	0	0	0.80857
Escherichia coli	MOD1-EC6432	B2	B2-2	GCA_002486055.1	5.0641	115	0	0	0.81058
Escherichia coli	MOD1-EC6411	B2	B2-2	GCA_002486095.1	4.7769	52	0	0	0.81956
Escherichia coli	MOD1-EC6410	B2	B2-2	GCA_002486125.1	4.77763	54	0	0	0.80957
Escherichia coli	MOD1-EC6191	B2	B2-2	GCA_002463415.1	4.93773	74	0	0	0.82313
Escherichia coli	MOD1-EC6715	B2	B2-2	GCA_002468665.1	4.81363	100	0	0	0.80382
Escherichia coli	HT2012178	B2	B2-2	GCA_002973455.1	5.27053	212	0	0	0.81316
Escherichia coli	HT2012027	B2	B2-2	GCA_002972115.1	5.22205	99	0	0	0.81115
Escherichia coli	HT2012121	B2	B2-2	GCA_002973095.1	5.24308	178	0	0	0.80337
Escherichia coli	HT2012114	B2	B2-2	GCA_002973055.1	5.1845	359	0	0	0.80218
Escherichia coli	HT2012110	B2	B2-2	GCA_002972325.1	5.30652	130	0	0	0.81458
Escherichia coli	HT2012DB27	B2	B2-2	GCA_002971735.1	5.36594	101	0	0	0.81741
Escherichia coli	HT2012DB25	B2	B2-2	GCA_002971615.1	5.34157	88	0	0	0.8157
Escherichia coli	HT2012103	B2	B2-2	GCA_002971815.1	5.32988	78	0	0	0.81054
Escherichia coli	MOD1-EC6358	B2	B2-2	GCA_002514025.1	5.25784	315	0	0	0.80205
Escherichia coli	upec-274	B2	B2-2	GCA_000777655.1	5.09958	102	0	0	0.80265
Escherichia coli HVH 193 (4-3331423)	HVH 193 (4-3331423)	B2	B2-2	GCA_000458915.1	5.02909	4	0	0	0.81329
Escherichia coli	upec-150	B2	B2-2	GCA_000780415.1	4.89749	65	0	0	0.80776
Escherichia coli	176-2175	B2	B2-2	GCA_002244875.1	4.96743	14	0	0	0.8182
Escherichia coli	176-2352	B2	B2-2	GCA_002244915.1	4.94088	9	0	0	0.81856
Escherichia coli	176-2312	B2	B2-2	GCA_002244885.1	4.94409	13	0	0	0.8174
Escherichia coli SWW33	SWW33	B2	B2-2	GCA_000364305.1	4.8814	11	0	0	0.80602
Escherichia coli MP1	MP1	B2	B2-2	GCA_000576655.2	4.76546	77	0	0	0.81189
Escherichia coli	MGH188	B2	B2-2	GCA_002152225.1	4.8163	11	0	0	0.81499
Escherichia coli	upec-95	B2	B2-2	GCA_000776435.1	4.72453	63	0	0	0.80046
Escherichia coli	MOD1-EC6316	B2	B2-2	GCA_002512745.1	5.05492	220	0	0	0.81632
Escherichia coli	MOD1-EC6323	B2	B2-2	GCA_002512735.1	4.99083	172	0	0	0.82167
Escherichia coli	MOD1-EC6322	B2	B2-2	GCA_002511435.1	5.00472	225	0	0	0.8158
Escherichia coli	upec-188	B2	B2-2	GCA_000779635.1	4.90648	58	0	0	0.80269
Escherichia coli	HT2012126	B2	B2-2	GCA_002973145.1	4.90494	133	0	0	0.80728
Escherichia coli	1409160003	B2	B2-2	GCA_001692795.1	5.06641	4	0	0	0.809
Escherichia coli K02	K02	B2	B2-2	GCA_000607285.1	4.83116	18	0	0	0.81564
Escherichia coli	50870281	B2	B2-2	GCA_001463455.1	5.22143	68	19	1	0.79726
Escherichia coli	MOD1-EC5824	B2	B2-2	GCA_002549105.1	4.98039	115	0	0	0.80728
Escherichia coli	MOD1-EC5884	B2	B2-2	GCA_002547505.1	5.108	156	0	0	0.8188
Escherichia coli	MOD1-EC5195	B2	B2-2	GCA_002474795.1	5.10881	150	0	0	0.80792
Escherichia coli	upec-116	B2	B2-2	GCA_000781195.1	4.92909	58	0	0	0.79493
Escherichia coli	MOD1-EC5964	B2	B2-2	GCA_002544275.1	4.84415	70	0	0	0.80523
Escherichia coli	HT2012172	B2	B2-2	GCA_002973355.1	5.12394	171	0	0	0.80466
Escherichia coli	HT2012163	B2	B2-2	GCA_002972815.1	5.22057	155	0	0	0.80871
Escherichia coli	HT2012128	B2	B2-2	GCA_002973115.1	5.06495	194	0	0	0.80368
Escherichia coli	HT2012175	B2	B2-2	GCA_002973395.1	5.18988	77	0	0	0.79887
Escherichia coli	HT2012DB07	B2	B2-2	GCA_002971455.1	5.02719	47	0	0	0.80804
Escherichia coli	HT2012023	B2	B2-2	GCA_002972475.1	5.01668	96	0	0	0.80345
Escherichia coli	HT2012DB03	B2	B2-2	GCA_002971695.1	4.99217	51	0	0	0.80676
Escherichia coli	HT2012040	B2	B2-2	GCA_002971975.1	5.00951	48	0	0	0.80666
Escherichia coli	MOD1-EC890	B2	B2-2	GCA_002465645.1	5.19092	233	0	0	0.7995
Escherichia coli	MOD1-EC6151	B2	B2-2	GCA_002535305.1	5.02647	109	0	0	0.80769
Escherichia coli H001	H001	B2	B2-2	GCA_002110085.1	5.04563	62	18	1	0.81555
Escherichia coli KD1	KD1	B2	B2-2	GCA_000264095.1	4.84283	157	0	0	0.81438
Escherichia coli	MOD1-EC6070	B2	B2-2	GCA_002541415.1	5.0894	117	0	0	0.81254
Escherichia coli	ECOR65	B2	B2-2	GCA_002189935.1	4.94421	183	18	1	0.8083
Escherichia coli	27099-1	B2	B2-2	GCA_003027695.1	4.629	27	0	0	0.79915
Escherichia coli	HT2012DB05	B2	B2-2	GCA_002971435.1	4.9566	57	0	0	0.79259
Escherichia coli	HT2012118	B2	B2-2	GCA_002973035.1	4.834	81	0	0	0.79055
Escherichia coli	HT2012076	B2	B2-2	GCA_002972195.1	4.87059	45	0	0	0.79393
Escherichia coli	MOD1-EC6887	B2	B2-2	GCA_002519935.1	5.01816	99	0	0	0.81347
Escherichia coli	MOD1-EC5853	B2	B2-2	GCA_002548445.1	4.80403	78	0	0	0.81181
Escherichia coli	MOD1-EC6362	B2	B2-2	GCA_002511125.1	4.82634	133	0	0	0.80958
Escherichia coli	MOD1-EC6352	B2	B2-2	GCA_002511205.1	4.95693	133	0	0	0.80792
Escherichia coli	HT2012DB17	B2	B2-2	GCA_002971525.1	4.94528	39	0	0	0.81113
Escherichia coli	MOD1-EC6347	B2	B2-2	GCA_002511215.1	4.8482	125	0	0	0.79334
Escherichia coli KTE19	KTE19	B2	B2-2	GCA_000407825.1	5.07854	5	0	0	0.81599
Escherichia coli B671	B671	B2	B2-2	GCA_002109655.1	5.10745	38	0	0	0.81063
Escherichia coli UMEA 4076-1	UMEA 4076-1	B2	B2-2	GCA_000461855.1	4.95553	11	19	1	0.82241
Escherichia coli	MOD1-EC6357	B2	B2-2	GCA_002511185.1	4.91848	179	0	0	0.82127
Escherichia coli	OLC-733	B2	B2-2	GCA_000948835.1	5.10575	81	0	0	0.80964
Escherichia coli	MOD1-EC6351	B2	B2-2	GCA_002512595.1	5.02973	167	19	1	0.81645
Escherichia coli	MOD1-EC5820	B2	B2-2	GCA_002549145.1	4.86791	62	19	1	0.82197
Escherichia coli	MOD1-EC5892	B2	B2-2	GCA_002486375.1	4.9115	67	19	1	0.8162
Escherichia coli	MOD1-EC5459	B2	B2-2	GCA_002229615.1	4.91869	89	0	0	0.79833
Escherichia coli	HT2012124	B2	B2-2	GCA_002973075.1	5.39735	185	0	0	0.81779
Escherichia coli	MOD1-EC5525	B2	B2-2	GCA_002229025.1	5.11459	172	0	0	0.82076
Escherichia coli	MOD1-EC5463	B2	B2-2	GCA_002230545.1	4.99868	134	0	0	0.79402
Escherichia coli	HT2012DB19	B2	B2-2	GCA_002971555.1	4.93783	96	0	0	0.81228
Escherichia coli	HT2012081	B2	B2-2	GCA_002972215.1	4.88283	135	0	0	0.80887
Escherichia coli	HT2012073	B2	B2-2	GCA_002972565.1	5.3183	171	0	0	0.82056
Escherichia coli	HT2012147	B2	B2-2	GCA_002973235.1	5.31679	169	0	0	0.82403
Escherichia coli	MOD1-EC5803	B2	B2-2	GCA_002473535.1	4.96082	136	0	0	0.80558
Escherichia coli	MOD1-EC5759	B2	B2-2	GCA_002473565.1	4.98693	102	0	0	0.81332
Escherichia coli	MOD1-EC6338	B2	B2-2	GCA_002512645.1	5.01729	162	0	0	0.81516
Escherichia coli	MOD1-EC6526	B2	B2-2	GCA_002485655.1	5.15792	116	0	0	0.81575
Escherichia coli KTE126	KTE126	B2	B2-2	GCA_000408685.1	5.05009	10	0	0	0.81161
Escherichia coli KTE47	KTE47	B2	B2-2	GCA_000351425.1	4.98747	11	0	0	0.81195
Escherichia coli	MOD1-EC5680	B2	B2-2	GCA_002226645.1	4.94276	83	0	0	0.81493
Escherichia coli	MOD1-EC6356	B2	B2-2	GCA_002512525.1	4.95768	142	0	0	0.79957
Escherichia coli HVH 24 (4-5985145)	HVH 24 (4-5985145)	B2	B2-2	GCA_000456345.1	4.90359	4	0	0	0.81474
Escherichia coli	MOD1-EC5084	B2	B2-2	GCA_002232835.1	4.97239	70	0	0	0.8088
Escherichia coli UMEA 3489-1	UMEA 3489-1	B2	B2-2	GCA_000507685.1	4.93579	7	0	0	0.8127
Escherichia coli	MOD1-EC6427	B2	B2-2	GCA_002512245.1	5.0803	66	0	0	0.79527
Escherichia coli	MOD1-EC6431	B2	B2-2	GCA_002486745.1	5.06494	66	0	0	0.80701
Escherichia coli	Tob1	B2	B2-2	GCA_001865895.1	5.18794	4	0	0	0.79219
Escherichia coli	HT2012061	B2	B2-2	GCA_002973015.1	5.31467	49	0	0	0.80686
Escherichia coli	HT2012N03	B2	B2-2	GCA_002971275.1	5.10155	62	0	0	0.80616
Escherichia coli	upec-78	B2	B2-2	GCA_000776065.1	4.90043	93	0	0	0.8002
Escherichia coli	STEC299	B2	B2-2	GCA_002863845.1	5.158	3	0	0	0.81173
Escherichia coli	MOD1-EC672	F	F	GCA_002456665.1	5.02059	104	0	0	0.80112
Escherichia coli	MOD1-EC663	F	F	GCA_002465965.1	5.2222	148	0	0	0.81284
Escherichia coli	MOD1-EC6658	F	F	GCA_002484785.1	5.17945	146	0	0	0.81426
Escherichia coli	ECOR38	F	F	GCA_002190865.1	5.87263	1552	0	0	0.81599
Escherichia coli	ECOR39	F	F	GCA_002190875.1	5.55877	1130	0	0	0.81393
Escherichia coli	ECOR40	F	F	GCA_002191055.1	5.62618	1407	1	0	0.81851
Escherichia coli	upec-286	F	F	GCA_000777475.1	5.33691	155	0	0	0.81581
Escherichia coli	MOD1-EC6444	F	F	GCA_002513485.1	5.38365	208	0	0	0.81267
Escherichia coli	SP-5	F	F	GCA_002885725.2	5.32442	204	0	0	0.81466
Escherichia coli UMEA 3899-1	UMEA 3899-1	F	F	GCA_000461795.1	5.53456	36	0	0	0.80942
Escherichia coli	MOD1-EC716	F	F	GCA_002465705.1	5.25592	271	0	0	0.81541
Escherichia coli	MOD1-EC700	F	F	GCA_002465485.1	5.23867	261	0	0	0.81405
Escherichia coli IAI39	IAI39	F	F	GCA_000026345.1	5.13207	1	0	0	0.8132
Escherichia coli	GN06186	F	F	GCA_001622135.1	5.13362	493	0	0	0.80591
Escherichia coli	MOD1-EC6668	F	F	GCA_002484595.1	5.14581	261	0	0	0.81525
Escherichia coli	SP-46 Combo	F	F	GCA_002888495.2	5.26066	193	0	0	0.80992
Escherichia coli	MOD1-EC693	F	F	GCA_002466825.1	5.23738	272	0	0	0.81738
Escherichia coli	ECOR41	F	F	GCA_002190885.1	5.26285	436	0	0	0.80653
Escherichia coli	GN02614	F	F	GCA_001521025.1	5.29004	367	0	0	0.80619
Escherichia coli O7:K1 str. CE10	CE10	F	F	GCA_000227625.1	5.37873	5	0	0	0.8171
Escherichia coli HVH 53 (4-0631051)	HVH 53 (4-0631051)	F	F	GCA_000456805.1	5.40058	11	0	0	0.79709
Escherichia coli HVH 187 (4-4471660)	HVH 187 (4-4471660)	F	F	GCA_000458805.1	5.48599	16	0	0	0.80758
Escherichia coli	blood-09-0012	F	F	GCA_000782335.1	5.41488	165	0	0	0.80567
Escherichia coli	blood-09-0023rep1	F	F	GCA_000782355.1	5.33932	163	0	0	0.80656
Escherichia coli	blood-09-0023rep2	F	F	GCA_000782315.1	5.31341	199	0	0	0.80613
Escherichia coli	OXA-LEB	F	F	GCA_001937985.1	5.89682	1050	0	0	0.82545
Escherichia coli KTE143	KTE143	F	F	GCA_000351945.1	5.07991	11	0	0	0.80934
Escherichia coli KTE74	KTE74	F	F	GCA_000408485.1	5.21804	14	0	0	0.80771
Escherichia coli KTE24	KTE24	F	F	GCA_000407865.1	5.39934	14	0	0	0.8178
Escherichia coli KTE69	KTE69	F	F	GCA_000408405.1	5.44733	17	0	0	0.8077
Escherichia coli KTE70	KTE70	F	F	GCA_000408425.1	5.48838	23	0	0	0.81127
Escherichia coli UMEA 3190-1	UMEA 3190-1	F	F	GCA_000460675.1	5.28311	31	0	0	0.80761
Escherichia coli	MOD1-EC6384	F	F	GCA_002512375.1	5.13442	445	0	0	0.79116
Escherichia coli	UPEC_003	F	F	GCA_001651605.1	5.24758	293	0	0	0.81895
Escherichia coli KTE38	KTE38	F	F	GCA_000408005.1	5.63929	27	0	0	0.81304
Escherichia coli KTE37	KTE37	F	F	GCA_000407985.1	5.55038	25	0	0	0.81489
Escherichia coli HVH 87 (4-5977630)	HVH 87 (4-5977630)	F	F	GCA_000457225.1	5.57541	24	0	0	0.81481
Escherichia coli	ABU 61	F	F	GCA_002761695.1	5.18345	197	0	0	0.8102
Escherichia coli UMEA 3304-1	UMEA 3304-1	F	F	GCA_000461175.1	5.34638	26	0	0	0.80311
Escherichia coli KTE98	KTE98	F	F	GCA_000408545.1	5.20993	5	0	0	0.81099
Escherichia coli	CD121	F	F	GCA_001571595.1	4.97549	108	0	0	0.81083
Escherichia coli KTE36	KTE36	F	F	GCA_000407965.1	5.31862	18	0	0	0.80691
[truncated: 7,366 more rows]

## Sheet: READ_ME
Genomic trinucleotide skew dataset reporting strain and assembly information, presence of the pks island, and the calculated trinucleotide skew (ATA+TAT/AAA+TTT)
