# Supplementary material for: Colibactin leads to a bacteria-specific mutation pattern and self-inflicted DNA damage
Source: HighWire-hosted journal article supplement (doi:10.1101/gr.279517.124), 2024-08-01
Supplement: Supplemental_Code.zip [file breseq_mutation_list.xlsx]

## Sheet: Sheet1
condition	sample	position	breseq_mutation	frequency	breseq_annotation	breseq_gene
pks+	pksPos11	158022	T>G	0.074	Y166S (TAC→TCC)	ligT
pks+	pksPos11	357551	T>G	0.255	E7D (GAA→GAC)	lacA
pks+	pksPos11	368544	T>C	0.057	H56H (CAT→CAC)	mhpF
pks+	pksPos11	592122	A>C	0.268	E356A (GAA→GCA)	cusC
pks+	pksPos11	1059765	A>T	0.271	N92Y (AAT→TAT)	yccE
pks+	pksPos11	1191676	C>T	1	H366H (CAC→CAT)	icd
pks+	pksPos11	1191688	C>T	1	T370T (ACC→ACT)	icd
pks+	pksPos11	1191701	T>C	1	L375M (TTA→CTG)	icd
pks+	pksPos11	1191703	A>G	1	L375M (TTA→CTG)	icd
pks+	pksPos11	1282493	C>T	0.056	intergenic (+511/+29)	narI / rttR
pks+	pksPos11	1352520	G>T	0.326	H309N (CAT→AAT)	puuP
pks+	pksPos11	1460896	C>T	0.056	pseudogene (1248/2513 nt)	ydbA
pks+	pksPos11	1463407	C>T	0.051	intergenic (‑1/‑91)	insC1 / ydbA
pks+	pksPos11	1659760	G>T	0.248	A63A (GCG→GCT)	clcB
pks+	pksPos11	1705533	A>C	0.227	E150A (GAA→GCA)	rsxE
pks+	pksPos11	2298492	A>G	0.058	intergenic (+620/+95)	eco / mqo
pks+	pksPos11	2359220	A>C	0.253	intergenic (‑121/‑187)	ais / arnB
pks+	pksPos11	2749579	C>T	0.051	A21V (GCC→GTC)	intA
pks+	pksPos11	2848042	A>T	0.224	K116* (AAA→TAA)	fhlA
pks+	pksPos11	2899745	T>A	0.17	F226I (TTT→ATT)	ygcG
pks+	pksPos11	4212306	T>A	0.144	K37I (AAA→ATA)	arpA
pks+	pksPos11	4245315	T>A	0.249	K360N (AAA→AAT)	plsB
pks+	pksPos12	405258	T>A	0.205	K73I (AAA→ATA)	rdgC
pks+	pksPos12	1066133	A>T	0.096	F93L (TTT→TTA)	rutE
pks+	pksPos12	1191676	C>T	0.752	H366H (CAC→CAT)	icd
pks+	pksPos12	1191688	C>T	0.76	T370T (ACC→ACT)	icd
pks+	pksPos12	1191701	T>C	0.739	L375L (TTA→CTA) ‡	icd
pks+	pksPos12	1191703	A>G	0.739	L375L (TTA→TTG) ‡	icd
pks+	pksPos12	1191733	C>T	0.511	N385N (AAC→AAT)	icd
pks+	pksPos12	1191736	G>C	0.511	A386A (GCG→GCC)	icd
pks+	pksPos12	1191739	A>G	0.535	K387K (AAA→AAG)	icd
pks+	pksPos12	1191748	C>T	0.355	T390T (ACC→ACT)	icd
pks+	pksPos12	1191760	G>A	0.31	E394E (GAG→GAA)	icd
pks+	pksPos12	1282617	G>A	0.065	noncoding (76/171 nt) Q6* (CAA→TAA)	rttR tpr
pks+	pksPos12	1369305	T>A	0.211	I29N (ATC→AAC)	ycjQ
pks+	pksPos12	1460467	G>A	0.051	pseudogene (819/2513 nt)	ydbA
pks+	pksPos12	1460593	C>G	0.054	pseudogene (945/2513 nt)	ydbA
pks+	pksPos12	1460602	T>C	0.063	pseudogene (954/2513 nt)	ydbA
pks+	pksPos12	1460896	C>T	0.057	pseudogene (1248/2513 nt)	ydbA
pks+	pksPos12	1559158	A>T	0.251	I278N (ATT→AAT)	dosP
pks+	pksPos12	1625441	A>T	0.132	pseudogene (1102/1284 nt)	ydfJ
pks+	pksPos12	1653856	A>T	0.301	K511* (AAA→TAA)	ynfE
pks+	pksPos12	1798904	T>A	0.177	pseudogene (1130/1476 nt)	arpB
pks+	pksPos12	1805767	T>A	0.322	F193I (TTT→ATT)	ydjN
pks+	pksPos12	1965876	T>A	0.165	K358I (AAA→ATA)	tar
pks+	pksPos12	2870027	G>A	0.227	G30S (GGC→AGC)	iap
pks+	pksPos12	2877814	A>T	0.228	intergenic (‑317/+98)	casA / ygcB
pks+	pksPos12	3460386	A>T	0.232	intergenic (‑36/+133)	bfd / chiA
pks+	pksPos12	3530093	A>T	0.261	intergenic (‑150/‑78)	ompR / greB
pks+	pksPos12	3724260	T>C	0.333	intergenic (‑135/‑231)	xylA / xylF
pks+	pksPos12	3902529	A>T	0.145	L91M (TTG→ATG)	pstA
pks+	pksPos12	4441948	T>G	0.138	N358K (AAT→AAG)	ytfR
pks+	pksPos12	4527131	C>T	0.127	G94D (GGC→GAC)	nanS
pks+	pksPos3	384206	A>T	0.172	intergenic (+104/+3)	tauD / hemB
pks+	pksPos3	1091101	A>C	0.224	pseudogene (141/342 nt)	ymdE
pks+	pksPos3	1191676	C>T	0.412	H366H (CAC→CAT)	icd
pks+	pksPos3	1191688	C>T	0.337	T370T (ACC→ACT)	icd
pks+	pksPos3	1191701	T>C	0.288	L375L (TTA→CTA) ‡	icd
pks+	pksPos3	1191703	A>G	0.288	L375L (TTA→TTG) ‡	icd
pks+	pksPos3	1191733	C>T	0.13	N385N (AAC→AAT)	icd
pks+	pksPos3	1191736	G>C	0.13	A386A (GCG→GCC)	icd
pks+	pksPos3	1191739	A>G	0.125	K387K (AAA→AAG)	icd
pks+	pksPos3	1191748	C>T	0.075	T390T (ACC→ACT)	icd
pks+	pksPos3	1206880	T>C	0.25	pseudogene (12/165 nt)	icdC
pks+	pksPos3	1206892	T>C	0.166	pseudogene (24/165 nt)	icdC
pks+	pksPos3	1206905	C>T	0.129	pseudogene (37/165 nt)	icdC
pks+	pksPos3	1206907	G>A	0.128	pseudogene (39/165 nt)	icdC
pks+	pksPos3	1255796	A>T	0.266	F155Y (TTT→TAT)	dauA
pks+	pksPos3	1282249	A>G	0.051	intergenic (+267/+273)	narI / rttR
pks+	pksPos3	1460458	T>C	0.057	pseudogene (810/2513 nt)	ydbA
pks+	pksPos3	1460467	G>A	0.06	pseudogene (819/2513 nt)	ydbA
pks+	pksPos3	1511558	T>G	0.199	intergenic (‑107/‑88)	yncL / ydcX
pks+	pksPos3	1641230	T>G	0.229	intergenic (+236/+201)	flxA / intK
pks+	pksPos3	1708412	C>T	0.051	Q463* (CAG→TAG)	dtpA
pks+	pksPos3	1811712	A>T	0.204	I349N (ATT→AAT)	chbF
pks+	pksPos3	1928841	G>A	0.212	R7R (CGC→CGT)	edd
pks+	pksPos3	2058694	A>T	0.274	L4I (TTA→ATA)	cobS
pks+	pksPos3	2760974	A>G	0.201	intergenic (+260/‑95)	rnlB / yfjP
pks+	pksPos3	3263401	T>G	0.084	intergenic (+440/+174)	yhaC / rnpB
pks+	pksPos3	3575112	Δ1 bp	0.167	intergenic (+126/‑111)	yhhY / yhhZ
pks+	pksPos3	3757525	T>C	0.177	L661L (CTT→CTC)	rhsA
pks+	pksPos3	3867374	T>A	0.27	D154V (GAT→GTT)	dgoK
pks+	pksPos3	3872811	C>A	0.262	K223N (AAG→AAT)	gyrB
pks+	pksPos3	4165077	A>T	0.19	intergenic (‑123/‑239)	coaA / thrU
pks+	pksPos3	4400384	A>T	0.244	K5N (AAA→AAT)	yjfJ
pks+	pksPos4	405258	T>A	0.094	K73I (AAA→ATA)	rdgC
pks+	pksPos4	503947	T>A	0.278	L92M (TTG→ATG)	ybaQ
pks+	pksPos4	844989	T>C	0.263	I189V (ATT→GTT)	rhtA
pks+	pksPos4	940942	T>A	0.147	L24F (TTA→TTT)	ycaC
pks+	pksPos4	1066133	A>T	0.067	F93L (TTT→TTA)	rutE
pks+	pksPos4	1165352	T>G	0.177	N160T (AAC→ACC)	ldtC
pks+	pksPos4	1191676	C>T	0.916	H366H (CAC→CAT)	icd
pks+	pksPos4	1191688	C>T	0.901	T370T (ACC→ACT)	icd
pks+	pksPos4	1191701	T>C	0.905	L375L (TTA→CTA) ‡	icd
pks+	pksPos4	1191703	A>G	0.905	L375L (TTA→TTG) ‡	icd
pks+	pksPos4	1389968	T>A	0.245	K71I (AAA→ATA)	ynaI
pks+	pksPos4	1460695	T>G	0.051	pseudogene (1047/2513 nt)	ydbA
pks+	pksPos4	1460896	C>T	0.061	pseudogene (1248/2513 nt)	ydbA
pks+	pksPos4	1527816	T>G	0.141	K98T (AAA→ACA)	yddH
pks+	pksPos4	1805767	T>A	0.108	F193I (TTT→ATT)	ydjN
pks+	pksPos4	1829805	A>T	0.228	I12F (ATT→TTT)	ynjA
pks+	pksPos4	1845799	A>C	0.237	N228T (AAT→ACT)	ansA
pks+	pksPos4	1965876	T>A	0.056	K358I (AAA→ATA)	tar
pks+	pksPos4	1985925	C>A	0.117	W125L (TGG→TTG)	pgsA
pks+	pksPos4	2033505	T>G	0.176	Y183D (TAT→GAT)	yedY
pks+	pksPos4	2033834	G>T	0.166	Q292H (CAG→CAT)	yedY
pks+	pksPos4	2452117	A>T	0.323	L174L (CTT→CTA)	fadJ
pks+	pksPos4	2582317	C>A	0.257	P455Q (CCA→CAA)	acrD
pks+	pksPos4	2582548	A>C	0.262	K532T (AAA→ACA)	acrD
pks+	pksPos4	2725683	G>A	0.199	A617V (GCG→GTG)	clpB
pks+	pksPos4	3048267	C>T	0.056	P179P (CCG→CCA)	ygfB
pks+	pksPos4	3724260	T>C	0.1	intergenic (‑135/‑231)	xylA / xylF
pks+	pksPos4	3792583	T>A	0.265	I30I (ATA→ATT)	waaU
pks+	pksPos4	4143544	C>T	0.058	intergenic (‑518/+80)	ppc / argE
pks+	pksPos4	4428152	T>A	0.178	F210Y (TTT→TAT)	ytfI
pks+	pksPos4	4441948	T>G	0.076	N358K (AAT→AAG)	ytfR
pks+	pksPos4	4465616	T>C	0.184	I121I (ATT→ATC)	yjgL
pks+	pksPos4	4603883	A>C	0.363	K196Q (AAA→CAA)	yjjV
pks+	pksPos5	355222	G>A	0.24	R8H (CGC→CAC)	cynS
pks+	pksPos5	725098	C>T	0.124	V20V (GTC→GTT)	rhsC
pks+	pksPos5	725116	A>G	0.164	V26V (GTA→GTG)	rhsC
pks+	pksPos5	727315	T>C	0.202	H759H (CAT→CAC)	rhsC
pks+	pksPos5	727325	A>G	0.187	N763D (AAT→GAT) ‡	rhsC
pks+	pksPos5	727327	T>A	0.187	N763K (AAT→AAA) ‡	rhsC
pks+	pksPos5	727329	A>C	0.188	E764A (GAA→GCA)	rhsC
pks+	pksPos5	727369	A>G	0.107	A777A (GCA→GCG)	rhsC
pks+	pksPos5	727375	A>G	0.108	G779G (GGA→GGG)	rhsC
pks+	pksPos5	773072	T>C	0.198	intergenic (+9/‑124)	tolA / tolB
pks+	pksPos5	1191676	C>T	0.35	H366H (CAC→CAT)	icd
pks+	pksPos5	1191688	C>T	0.281	T370T (ACC→ACT)	icd
pks+	pksPos5	1191701	T>C	0.235	L375L (TTA→CTA) ‡	icd
pks+	pksPos5	1191703	A>G	0.235	L375L (TTA→TTG) ‡	icd
pks+	pksPos5	1191733	C>T	0.136	N385N (AAC→AAT)	icd
pks+	pksPos5	1191736	G>C	0.136	A386A (GCG→GCC)	icd
pks+	pksPos5	1191739	A>G	0.15	K387K (AAA→AAG)	icd
pks+	pksPos5	1309017	A>T	0.26	F155L (TTT→TTA)	yciE
pks+	pksPos5	1319494	G>A	0.302	K164K (AAG→AAA)	yciQ
pks+	pksPos5	1375394	T>A	0.299	pseudogene (317/957 nt)	ycjV
pks+	pksPos5	1460458	T>C	0.062	pseudogene (810/2513 nt)	ydbA
pks+	pksPos5	1460467	G>A	0.068	pseudogene (819/2513 nt)	ydbA
pks+	pksPos5	1636684	A>C	0.246	intergenic (+360/+62)	cspF / quuQ
pks+	pksPos5	1703062	T>C	0.051	R629R (CGT→CGC)	rsxC
pks+	pksPos5	1703101	C>G	0.055	A642A (GCC→GCG)	rsxC
pks+	pksPos5	1703104	G>A	0.063	E643E (GAG→GAA)	rsxC
pks+	pksPos5	1773065	A>C	0.256	F165C (TTT→TGT)	ydiP
pks+	pksPos5	1916395	T>A	0.228	L6L (CTT→CTA)	yebW
pks+	pksPos5	1932965	C>A	0.221	L354M (CTG→ATG)	pykA
pks+	pksPos5	2054607	A>C	0.265	L270V (TTA→GTA)	nac
pks+	pksPos5	2225534	T>G	0.263	F71C (TTT→TGT)	cdd
pks+	pksPos5	2298128	C>T	0.075	intergenic (+256/+459)	eco / mqo
pks+	pksPos5	2614301	A>T	0.184	intergenic (‑70/‑255)	upp / purM
pks+	pksPos5	2731059	IS4 (+) +13 bp	0.294	intergenic (+54/‑33)	pheL / pheA
pks+	pksPos5	3263289	C>T	0.071	intergenic (+328/+286)	yhaC / rnpB
pks+	pksPos5	3326521	T>C	0.3	K97R (AAA→AGA)	rplU
pks+	pksPos5	3551499	T>A	0.275	intergenic (‑61/‑128)	rtcB / rtcR
pks+	pksPos5	3755626	T>C	0.092	I28I (ATT→ATC)	rhsA
pks+	pksPos5	3755668	A>G	0.065	G42G (GGA→GGG)	rhsA
pks+	pksPos5	3760532	G>A	0.261	R279H (CGT→CAT)	yibA
pks+	pksPos5	3795181	A>T	0.308	F60Y (TTT→TAT)	waaJ
pks+	pksPos6	1063730	A>T	0.137	intergenic (+20/+237)	ymdF / rutG
pks+	pksPos6	1191676	C>T	0.369	H366H (CAC→CAT)	icd
pks+	pksPos6	1191688	C>T	0.275	T370T (ACC→ACT)	icd
pks+	pksPos6	1191701	T>C	0.256	L375L (TTA→CTA) ‡	icd
pks+	pksPos6	1191703	A>G	0.256	L375L (TTA→TTG) ‡	icd
pks+	pksPos6	1191733	C>T	0.127	N385N (AAC→AAT)	icd
pks+	pksPos6	1191736	G>C	0.127	A386A (GCG→GCC)	icd
pks+	pksPos6	1191739	A>G	0.133	K387K (AAA→AAG)	icd
pks+	pksPos6	1191748	C>T	0.071	T390T (ACC→ACT)	icd
pks+	pksPos6	1194198	A>G	0.067	P16P (CCA→CCG)	lit
pks+	pksPos6	1282421	A>G	0.062	intergenic (+439/+101)	narI / rttR
pks+	pksPos6	1527816	T>G	0.12	K98T (AAA→ACA)	yddH
pks+	pksPos6	1985925	C>A	0.091	W125L (TGG→TTG)	pgsA
pks+	pksPos6	1999033	A>T	0.261	N84Y (AAC→TAC)	fliS
pks+	pksPos6	2030785	T>A	0.243	E283D (GAA→GAT)	yedV
pks+	pksPos6	2305022	A>C	0.073	intergenic (‑9/+103)	apbE / ompC
pks+	pksPos6	2444060	A>T	0.193	S4T (TCA→ACA)	yfcP
pks+	pksPos6	3048247	A>C	0.188	V186G (GTA→GGA)	ygfB
pks+	pksPos6	3263502	C>T	0.094	intergenic (+541/+73)	yhaC / rnpB
pks+	pksPos6	3745327	Δ12 bp	0.083	intergenic (‑99/‑14)	yiaT / yiaU
pks+	pksPos6	3809774	C>A	0.064	pseudogene (136/669 nt)	rph
pks+	pksPos6	4465616	T>C	0.158	I121I (ATT→ATC)	yjgL
pks+	pksPos6	4589723	T>A	0.249	N95I (AAC→ATC)	yjjA
pks+	pksPos7	11780	A>T	0.23	S3T (TCC→ACC)	yaaI
pks+	pksPos7	426113	A>C	0.319	K18T (AAA→ACA)	yajD
pks+	pksPos7	453222	A>T	0.245	N114I (AAC→ATC)	clpX
pks+	pksPos7	837527	A>T	0.062	intergenic (‑15/‑261)	mcbA / rlmF
pks+	pksPos7	1091382	IS1 (–) +9 bp	0.214	coding (84‑92/987 nt)	ycdU
pks+	pksPos7	1191676	C>T	0.549	H366H (CAC→CAT)	icd
pks+	pksPos7	1191688	C>T	0.471	T370T (ACC→ACT)	icd
pks+	pksPos7	1191701	T>C	0.45	L375L (TTA→CTA) ‡	icd
pks+	pksPos7	1191703	A>G	0.45	L375L (TTA→TTG) ‡	icd
pks+	pksPos7	1191733	C>T	0.233	N385N (AAC→AAT)	icd
pks+	pksPos7	1191736	G>C	0.233	A386A (GCG→GCC)	icd
pks+	pksPos7	1191739	A>G	0.233	K387K (AAA→AAG)	icd
pks+	pksPos7	1191748	C>T	0.115	T390T (ACC→ACT)	icd
pks+	pksPos7	1282801	T>A	0.292	intergenic (‑17/+193)	tyrV / tyrT
pks+	pksPos7	1460861	G>A	0.059	pseudogene (1213/2513 nt)	ydbA
pks+	pksPos7	1460896	C>T	0.08	pseudogene (1248/2513 nt)	ydbA
pks+	pksPos7	1461709	A>T	0.202	pseudogene (2061/2513 nt)	ydbA
pks+	pksPos7	1501745	A>T	0.175	V236V (GTA→GTT)	ydcP
pks+	pksPos7	1643482	A>C	0.241	intergenic (+184/‑157)	ydfC / dicF
pks+	pksPos7	1702954	C>A	0.057	A593A (GCC→GCA)	rsxC
pks+	pksPos7	1725177	G>T	0.253	G612C (GGT→TGT)	lhr
pks+	pksPos7	1729236	A>T	0.323	K182I (AAA→ATA)	mepH
pks+	pksPos7	1739981	T>A	0.155	K135I (AAA→ATA)	ydhQ
pks+	pksPos7	2473330	G>A	0.199	G217D (GGT→GAT)	dsdA
pks+	pksPos7	2795545	A>C	0.087	K280T (AAA→ACA)	nrdE
pks+	pksPos7	3048267	C>T	0.065	P179P (CCG→CCA)	ygfB
pks+	pksPos7	4315905	T>G	0.057	intergenic (‑347/+311)	yjdN / yjdM
pks+	pksPos7	4367980	T>C	0.234	E261G (GAG→GGG)	ampC
pks+	pksPos8	208931	A>C	0.154	E38D (GAA→GAC)	tilS
pks+	pksPos8	732071	T>C	0.073	pseudogene (171/240 nt)	ybfQ
pks+	pksPos8	1063730	A>T	0.076	intergenic (+20/+237)	ymdF / rutG
pks+	pksPos8	1191676	C>T	0.851	H366H (CAC→CAT)	icd
pks+	pksPos8	1191688	C>T	0.818	T370T (ACC→ACT)	icd
pks+	pksPos8	1191701	T>C	0.828	L375L (TTA→CTA) ‡	icd
pks+	pksPos8	1191703	A>G	0.83	L375L (TTA→TTG) ‡	icd
pks+	pksPos8	1191733	C>T	0.636	N385N (AAC→AAT)	icd
pks+	pksPos8	1191736	G>C	0.636	A386A (GCG→GCC)	icd
pks+	pksPos8	1191739	A>G	0.724	K387K (AAA→AAG)	icd
pks+	pksPos8	1191748	C>T	0.62	T390T (ACC→ACT)	icd
pks+	pksPos8	1191760	G>A	0.471	E394E (GAG→GAA)	icd
pks+	pksPos8	1193467	G>A	0.309	A76V (GCA→GTA)	ymfE
pks+	pksPos8	1278613	C>A	0.338	I1098I (ATC→ATA)	narG
pks+	pksPos8	1296297	C>A	0.103	P287T (CCG→ACG)	oppA
pks+	pksPos8	1703062	T>C	0.055	R629R (CGT→CGC)	rsxC
pks+	pksPos8	1708003	G>T	0.087	P326P (CCG→CCT)	dtpA
pks+	pksPos8	1818263	A>G	0.168	K164K (AAA→AAG)	cho
pks+	pksPos8	1822044	T>A	0.084	K158I (AAA→ATA)	astB
pks+	pksPos8	2034779	IS5 (+) +4 bp	0.09	intergenic (+180/‑74)	yedZ / zinT
pks+	pksPos8	2355664	G>A	0.227	A9A (GCC→GCT)	rhmR
pks+	pksPos8	2359321	A>T	0.233	intergenic (‑222/‑86)	ais / arnB
pks+	pksPos8	2470804	G>A	0.067	S102L (TCG→TTG)	dsdC
pks+	pksPos8	2935433	A>T	0.251	L165* (TTA→TAA)	gcvA
pks+	pksPos8	3377945	T>A	0.199	intergenic (‑318/‑117)	mdh / argR
pks+	pksPos8	4593188	IS5 (–) +4 bp	0.128	intergenic (‑513/‑103)	yjjP / yjjQ
pks+	pksPos9	222268	G>A	0.278	noncoding (23/2904 nt)	rrlH
pks+	pksPos9	345777	T>A	0.243	S19T (TCT→ACT)	prpC
pks+	pksPos9	370442	T>C	0.067	intergenic (+105/‑473)	mhpE / mhpT
pks+	pksPos9	656879	T>A	0.19	intergenic (‑45/+214)	ybeF / lipB
pks+	pksPos9	666608	C>A	0.25	A152S (GCT→TCT)	holA
pks+	pksPos9	726166	A>C	0.249	L376F (TTA→TTC)	rhsC
pks+	pksPos9	840051	C>T	0.357	A296T (GCG→ACG)	ybiO
pks+	pksPos9	1191676	C>T	0.383	H366H (CAC→CAT)	icd
pks+	pksPos9	1191688	C>T	0.374	T370T (ACC→ACT)	icd
pks+	pksPos9	1191701	T>C	0.353	L375L (TTA→CTA) ‡	icd
pks+	pksPos9	1191703	A>G	0.353	L375L (TTA→TTG) ‡	icd
pks+	pksPos9	1191733	C>T	0.193	N385N (AAC→AAT)	icd
pks+	pksPos9	1191736	G>C	0.193	A386A (GCG→GCC)	icd
pks+	pksPos9	1191739	A>G	0.194	K387K (AAA→AAG)	icd
pks+	pksPos9	1191748	C>T	0.124	T390T (ACC→ACT)	icd
pks+	pksPos9	1191760	G>A	0.06	E394E (GAG→GAA)	icd
pks+	pksPos9	1295231	A>T	0.254	intergenic (+530/‑208)	ychE / oppA
pks+	pksPos9	1460593	C>G	0.05	pseudogene (945/2513 nt)	ydbA
pks+	pksPos9	1703008	A>G	0.051	E611E (GAA→GAG)	rsxC
pks+	pksPos9	1703104	G>A	0.07	E643E (GAG→GAA)	rsxC
pks+	pksPos9	1964931	A>T	0.223	F104Y (TTT→TAT)	tap
pks+	pksPos9	2117349	T>A	0.217	K218I (AAA→ATA)	cpsB
pks+	pksPos9	2337437	IS2 (–) +5 bp	0.285	coding (208‑212/3753 nt)	yfaL
pks+	pksPos9	2595532	A>T	0.213	N119I (AAT→ATT)	hyfB
pks+	pksPos9	2666963	T>A	0.215	F87I (TTC→ATC)	yphA
pks+	pksPos9	3753562	T>A	0.276	K350* (AAA→TAA)	selA
pks+	pksPos10	208931	A>C	0.084	E38D (GAA→GAC)	tilS
pks+	pksPos10	439649	T>C	0.118	N108S (AAC→AGC)	panE
pks+	pksPos10	447838	G>A	0.116	S388S (TCC→TCT)	ampG
pks+	pksPos10	1142145	A>T	0.156	noncoding (101/169 nt)	psrD
pks+	pksPos10	1191676	C>T	1	H366H (CAC→CAT)	icd
pks+	pksPos10	1191688	C>T	1	T370T (ACC→ACT)	icd
pks+	pksPos10	1191701	T>C	1	L375M (TTA→CTG)	icd
pks+	pksPos10	1191703	A>G	1	L375M (TTA→CTG)	icd
pks+	pksPos10	1296297	C>A	0.152	P287T (CCG→ACG)	oppA
pks+	pksPos10	1542196	T>C	0.151	F180S (TTT→TCT)	fdnG
pks+	pksPos10	1609330	A>C	0.145	L90F (TTA→TTC)	yneJ
pks+	pksPos10	1644507	T>A	0.126	pseudogene (173/765 nt)	ydfE
pks+	pksPos10	1708003	G>T	0.086	P326P (CCG→CCT)	dtpA
pks+	pksPos10	1818263	A>G	0.094	K164K (AAA→AAG)	cho
pks+	pksPos10	1822044	T>A	0.059	K158I (AAA→ATA)	astB
pks+	pksPos10	2034779	IS5 (+) +4 bp	0.094	intergenic (+180/‑74)	yedZ / zinT
pks+	pksPos10	2937398	A>G	0.27	K235E (AAA→GAA)	csdA
pks+	pksPos10	3048237	C>T	0.06	P189P (CCG→CCA)	ygfB
pks+	pksPos10	3420206	G>A	0.116	intergenic (‑64/+111)	rrlD / alaU
pks+	pksPos10	4081476	G>T	0.082	H580Q (CAC→CAA)	frvR
pks+	pksPos10	4285857	T>C	0.065	intergenic (+135/+396)	gltP / yjcO
pks+	pksPos10	4285893	A>C	0.063	intergenic (+171/+360)	gltP / yjcO
pks+	pksPos1	161068	A>C	0.147	intergenic (+47/‑149)	hrpB / mrcB
pks+	pksPos1	252956	C>G	0.076	intergenic (+34/‑58)	gpt / frsA
pks+	pksPos1	576215	G>C	0.131	intergenic (‑314/‑75)	ylcI / nohD
pks+	pksPos1	776779	Δ124 bp	0.217		lysZ
pks+	pksPos1	896129	A>C	0.255	intergenic (‑98/+193)	artJ / artM
pks+	pksPos1	1060644	C>T	0.245	H385Y (CAT→TAT)	yccE
pks+	pksPos1	1191676	C>T	0.643	H366H (CAC→CAT)	icd
pks+	pksPos1	1191688	C>T	0.588	T370T (ACC→ACT)	icd
pks+	pksPos1	1191701	T>C	0.542	L375L (TTA→CTA) ‡	icd
pks+	pksPos1	1191703	A>G	0.542	L375L (TTA→TTG) ‡	icd
pks+	pksPos1	1191733	C>T	0.389	N385N (AAC→AAT)	icd
pks+	pksPos1	1191736	G>C	0.388	A386A (GCG→GCC)	icd
pks+	pksPos1	1191739	A>G	0.4	K387K (AAA→AAG)	icd
pks+	pksPos1	1191748	C>T	0.271	T390T (ACC→ACT)	icd
pks+	pksPos1	1191760	G>A	0.153	E394E (GAG→GAA)	icd
pks+	pksPos1	1632928	T>C	0.233	intergenic (‑4/+359)	cspI / rzpQ
pks+	pksPos1	1887111	T>G	0.245	S128R (AGC→CGC)	yoaA
pks+	pksPos1	2170713	C>A	0.134	intergenic (‑30/+278)	gatY / fbaB
pks+	pksPos1	2170724	G>T	0.156	intergenic (‑41/+267)	gatY / fbaB
pks+	pksPos1	2170754	C>A	0.069	intergenic (‑71/+237)	gatY / fbaB
pks+	pksPos1	2170758	C>A	0.074	intergenic (‑75/+233)	gatY / fbaB
pks+	pksPos1	2420334	A>T	0.275	intergenic (‑67/+154)	hisJ / argT
pks+	pksPos1	2463906	C>A	0.116	Q433K (CAA→AAA)	gtrS
pks+	pksPos1	2463910	G>T	0.093	R434I (AGA→ATA)	gtrS
pks+	pksPos1	2463915	C>A	0.113	Q436K (CAA→AAA)	gtrS
pks+	pksPos1	2538290	C>T	0.295	A227T (GCG→ACG)	murR
pks+	pksPos1	2609761	A>T	0.212	E103D (GAA→GAT)	bepA
pks+	pksPos1	2629922	T>G	0.277	K265T (AAA→ACA)	der
pks+	pksPos1	3011573	G>T	0.209	A719S (GCA→TCA)	ygfK
pks+	pksPos1	3044057	A>T	0.251	intergenic (‑31/+417)	gcvT / ubiI
pks+	pksPos1	3059717	Δ1 bp	0.29	coding (816/897 nt)	ygfI
pks+	pksPos1	3822340	A>C	0.098	Q12H (CAA→CAC)	xanP
pks+	pksPos1	4234541	G>T	0.152	Q155K (CAA→AAA)	malF
pks+	pksPos1	4532409	A>C	0.226	N186H (AAT→CAT)	fimE
pks+	pksPos2	357016	T>G	0.059	N186H (AAC→CAC)	lacA
pks+	pksPos2	357039	G>C	0.057	P178R (CCT→CGT)	lacA
pks+	pksPos2	576183	G>T	0.063	intergenic (‑282/‑107)	ylcI / nohD
pks+	pksPos2	838661	T>G	0.113	W292G (TGG→GGG)	rlmF
pks+	pksPos2	1045283	T>G	0.15	intergenic (‑83/‑6)	gfcA / insA
pks+	pksPos2	1160024	G>C	0.141	M158I (ATG→ATC)	nagZ
pks+	pksPos2	1191676	C>T	0.294	H366H (CAC→CAT)	icd
pks+	pksPos2	1191688	C>T	0.256	T370T (ACC→ACT)	icd
pks+	pksPos2	1191701	T>C	0.217	L375L (TTA→CTA) ‡	icd
pks+	pksPos2	1191703	A>G	0.224	L375L (TTA→TTG) ‡	icd
pks+	pksPos2	1191733	C>T	0.107	N385N (AAC→AAT)	icd
pks+	pksPos2	1191736	G>C	0.107	A386A (GCG→GCC)	icd
pks+	pksPos2	1191739	A>G	0.112	K387K (AAA→AAG)	icd
pks+	pksPos2	1191748	C>T	0.059	T390T (ACC→ACT)	icd
pks+	pksPos2	1339767	G>C	0.249	T411T (ACC→ACG)	gmr
pks+	pksPos2	1362888	C>A	0.227	H185N (CAC→AAC)	pspA
pks+	pksPos2	1516468	A>C	0.073	Y285* (TAT→TAG)	yncD
pks+	pksPos2	1630709	C>G	0.145	intergenic (‑85/‑304)	nohQ / ynfO
pks+	pksPos2	1767306	A>T	0.216	I180F (ATC→TTC)	ydiN
pks+	pksPos2	1947356	T>G	0.3	F133C (TTT→TGT)	cmoA
pks+	pksPos2	2170707	C>A	0.136	intergenic (‑24/+284)	gatY / fbaB
pks+	pksPos2	2170713	C>A	0.206	intergenic (‑30/+278)	gatY / fbaB
pks+	pksPos2	2170724	G>T	0.254	intergenic (‑41/+267)	gatY / fbaB
pks+	pksPos2	2170758	C>A	0.082	intergenic (‑75/+233)	gatY / fbaB
pks+	pksPos2	2170775	G>T	0.11	intergenic (‑92/+216)	gatY / fbaB
pks+	pksPos2	2170785	C>A	0.09	intergenic (‑102/+206)	gatY / fbaB
pks+	pksPos2	2463910	G>T	0.106	R434I (AGA→ATA)	gtrS
pks+	pksPos2	2463915	C>A	0.103	Q436K (CAA→AAA)	gtrS
pks+	pksPos2	2569457	T>A	0.224	*760Y (TAA→TAT)	maeB
pks+	pksPos2	2719191	G>T	0.142	intergenic (‑86/+237)	kgtP / rrfG
pks+	pksPos2	2719536	G>T	0.372	noncoding (12/120 nt)	rrfG
pks+	pksPos2	2998364	G>T	0.059	A261E (GCA→GAA)	ygeV
pks+	pksPos2	3039409	T>G	0.067	intergenic (‑149/+118)	ygfF / gcvP
pks+	pksPos2	3080755	T>G	0.092	F231V (TTC→GTC)	metK
pks+	pksPos2	3657233	T>C	0.243	intergenic (+346/+17)	mdtF / gadW
pks+	pksPos2	3822340	A>C	0.119	Q12H (CAA→CAC)	xanP
pks+	pksPos2	3827184	T>G	0.221	E238D (GAA→GAC)	yicI
pks+	pksPos2	4058518	C>A	0.063	M203I (ATG→ATT)	yihO
pks+	pksPos2	4207788	A>T	0.249	E251V (GAA→GTA)	aceA
pks+	pksPos2	4234581	G>T	0.075	G141G (GGC→GGA)	malF
pks+	pksPos2	4236482	G>T	0.086	intergenic (‑135/‑230)	malE / malK
pks+	pksPos2	4280750	T>A	0.167	F116Y (TTT→TAT)	nrfD
pks+	pksPos2	4375484	G>T	0.056	R92L (CGT→CTT)	yjeN
pks+	pksPos2	4375491	C>A	0.083	R94R (CGC→CGA)	yjeN
pks+	pksPos2	4495531	C>T	0.177	S143L (TCA→TTA)	yjhC
pks+	pksPos2	4550545	A>T	0.24	intergenic (‑48/‑202)	yjiH / kptA
pks+	pksPos2	4586623	G>T	0.058	E273* (GAA→TAA)	yjjN
pks+	pksPos2	4586640	A>C	0.096	E278D (GAA→GAC)	yjjN
pks-	pksNeg1	161068	A>C	0.28	intergenic (+47/‑149)	hrpB / mrcB
pks-	pksNeg1	418995	T>G	0.059	L341R (CTG→CGG)	malZ
pks-	pksNeg1	910682	T>G	0.09	intergenic (‑369/+126)	ybjE / aqpZ
pks-	pksNeg1	1282493	C>G	0.064	intergenic (+511/+29)	narI / rttR
pks-	pksNeg1	1913770	G>A	0.24	L668L (CTG→CTA)	yebT
pks-	pksNeg1	2170713	C>A	0.162	intergenic (‑30/+278)	gatY / fbaB
pks-	pksNeg1	2170724	G>T	0.161	intergenic (‑41/+267)	gatY / fbaB
pks-	pksNeg1	2200977	T>G	0.069	L602V (TTA→GTA)	yehM
pks-	pksNeg1	2404720	C>A	0.094	A38S (GCA→TCA)	yfbS
pks-	pksNeg1	2463910	G>T	0.129	R434I (AGA→ATA)	gtrS
pks-	pksNeg1	2998364	G>T	0.065	A261E (GCA→GAA)	ygeV
pks-	pksNeg1	3048264	T>G	0.081	Q180H (CAA→CAC)	ygfB
pks-	pksNeg1	3080755	T>G	0.066	F231V (TTC→GTC)	metK
pks-	pksNeg1	3385560	C>G	0.057	intergenic (‑173/+257)	tldD / yhdP
pks-	pksNeg1	3822340	A>C	0.082	Q12H (CAA→CAC)	xanP
pks-	pksNeg1	4586609	A>T	0.064	Q268L (CAG→CTG)	yjjN
pks-	pksNeg2	295695	T>G	0.05	E317D (GAA→GAC)	paoC
pks-	pksNeg2	1282287	T>G	0.103	intergenic (+305/+235)	narI / rttR
pks-	pksNeg2	1802451	Δ8 bp	0.269	coding (399‑406/861 nt)	yniA
pks-	pksNeg2	2170713	C>A	0.149	intergenic (‑30/+278)	gatY / fbaB
pks-	pksNeg2	2170724	G>T	0.185	intergenic (‑41/+267)	gatY / fbaB
pks-	pksNeg2	2170758	C>A	0.077	intergenic (‑75/+233)	gatY / fbaB
pks-	pksNeg2	2463906	C>A	0.138	Q433K (CAA→AAA)	gtrS
pks-	pksNeg2	2463910	G>T	0.16	R434I (AGA→ATA)	gtrS
pks-	pksNeg2	2463915	C>A	0.159	Q436K (CAA→AAA)	gtrS
pks-	pksNeg2	2958464	C>G	0.11	Q17H (CAG→CAC)	thyA
pks-	pksNeg2	3080755	T>G	0.086	F231V (TTC→GTC)	metK
pks-	pksNeg2	3496619	G>T	0.255	V32L (GTG→TTG)	frlD
pks-	pksNeg3	1702975	G>A	0.06	A600A (GCG→GCA)	rsxC
pks-	pksNeg3	3250645	A>G	0.265	V242A (GTG→GCG)	yhaO
pks-	pksNeg3	3333912	T>C	0.055	P93P (CCT→CCC)	yrbG
pks-	pksNeg3	4143586	C>T	0.061	intergenic (‑560/+38)	ppc / argE
pks-	pksNeg4	1282322	A>G	0.085	intergenic (+340/+200)	narI / rttR
pks-	pksNeg4	1282430	C>T	0.056	intergenic (+448/+92)	narI / rttR
pks-	pksNeg4	1460861	G>A	0.052	pseudogene (1213/2513 nt)	ydbA
pks-	pksNeg4	2298128	C>T	0.083	intergenic (+256/+459)	eco / mqo
pks-	pksNeg4	2723018	T>C	0.066	noncoding (1499/1542 nt)	rrsG
pks-	pksNeg4	3373973	C>T	0.067	intergenic (+25/‑129)	yhcB / degQ
pks-	pksNeg4	3631510	C>T	0.079	A170V (GCT→GTT)	pitA
pks-	pksNeg4	4143375	A>G	0.053	intergenic (‑349/+249)	ppc / argE
pks-	pksNeg5	1282326	C>A	0.057	intergenic (+344/+196)	narI / rttR
pks-	pksNeg5	1282617	G>A	0.05	noncoding (76/171 nt) Q6* (CAA→TAA)	rttR tpr
pks-	pksNeg5	3285459	IS5 (–) +4 bp	0.117	coding (760‑763/1092 nt)	yraK
pks-	pksNeg6	1217391	G>A	0.053	pseudogene (2335/2648 nt)	ycgH
pks-	pksNeg6	1282287	T>G	0.057	intergenic (+305/+235)	narI / rttR
pks-	pksNeg6	1588245	C>T	0.051	pseudogene (4000/5323 nt)	yneO
pks-	pksNeg6	1789448	C>T	0.075	intergenic (‑39/+62)	btuC / ihfA
pks-	pksNeg6	2165296	T>C	0.09	intergenic (‑88/+18)	gatR / gatD
pks-	pksNeg6	2298492	A>G	0.056	intergenic (+620/+95)	eco / mqo
pks-	pksNeg6	2470798	G>A	0.082	T104M (ACG→ATG)	dsdC
pks-	pksNeg6	3256912	G>A	0.058	D36D (GAC→GAT)	tdcD
pks-	pksNeg7	360243	G>T	0.053	intergenic (‑177/+418)	lacZ / lacI
pks-	pksNeg7	1273968	C>T	0.237	P186S (CCG→TCG)	narK
pks-	pksNeg7	1282249	A>G	0.067	intergenic (+267/+273)	narI / rttR
pks-	pksNeg7	1282421	A>G	0.064	intergenic (+439/+101)	narI / rttR
pks-	pksNeg7	1282430	C>T	0.074	intergenic (+448/+92)	narI / rttR
pks-	pksNeg7	1460752	C>T	0.05	pseudogene (1104/2513 nt)	ydbA
pks-	pksNeg7	2811683	G>A	0.079	intergenic (‑50/+149)	argY / argV
pks-	pksNeg7	4143375	A>G	0.06	intergenic (‑349/+249)	ppc / argE
pks-	pksNeg8	1460458	T>C	0.06	pseudogene (810/2513 nt)	ydbA
pks-	pksNeg8	1460467	G>A	0.075	pseudogene (819/2513 nt)	ydbA
pks-	pksNeg8	1460861	G>A	0.066	pseudogene (1213/2513 nt)	ydbA
pks-	pksNeg8	1460896	C>T	0.056	pseudogene (1248/2513 nt)	ydbA
pks-	pksNeg8	1703101	C>G	0.058	A642A (GCC→GCG)	rsxC
pks-	pksNeg8	4169668	C>T	0.051	intergenic (+157/‑256)	rplA / rplJ
pks-	pksNeg9	1282421	A>G	0.068	intergenic (+439/+101)	narI / rttR
pks-	pksNeg9	1282430	C>T	0.077	intergenic (+448/+92)	narI / rttR
pks-	pksNeg9	1282439	A>G	0.056	intergenic (+457/+83)	narI / rttR
pks-	pksNeg9	3632645	T>C	0.059	intergenic (+144/+100)	pitA / uspB
pks-	pksNeg9	4143544	C>T	0.071	intergenic (‑518/+80)	ppc / argE
pks-	pksNeg10	142422	C>T	0.155	S285S (AGC→AGT)	yadE
pks-	pksNeg10	1282421	A>G	0.065	intergenic (+439/+101)	narI / rttR
pks-	pksNeg10	1282430	C>T	0.072	intergenic (+448/+92)	narI / rttR
pks-	pksNeg10	3795003	C>A	0.282	L119F (TTG→TTT)	waaJ
pks-	pksNeg11	307773	IS5 (–) +4 bp	0.275	intergenic (‑726/‑47)	ecpR / ykgL
pks-	pksNeg11	1460467	G>A	0.05	pseudogene (819/2513 nt)	ydbA
pks-	pksNeg11	1702966	T>C	0.058	R597R (CGT→CGC)	rsxC
pks-	pksNeg11	2470733	T>G	0.065	T126P (ACA→CCA)	dsdC
pks-	pksNeg11	3263314	G>A	0.15	intergenic (+353/+261)	yhaC / rnpB
pks-	pksNeg11	4029211	A>G	0.282	noncoding (321/1542 nt)	rrsA
pks-	pksNeg12	1142145	A>T	0.161	noncoding (101/169 nt)	psrD
pks-	pksNeg12	1191676	C>T	0.117	H366H (CAC→CAT)	icd
pks-	pksNeg12	1191688	C>T	0.076	T370T (ACC→ACT)	icd
pks-	pksNeg12	1191701	T>C	0.065	L375L (TTA→CTA) ‡	icd
pks-	pksNeg12	1191703	A>G	0.067	L375L (TTA→TTG) ‡	icd
pks-	pksNeg12	1282287	T>G	0.093	intergenic (+305/+235)	narI / rttR
pks-	pksNeg12	1460861	G>A	0.059	pseudogene (1213/2513 nt)	ydbA
pks-	pksNeg12	1542196	T>C	0.125	F180S (TTT→TCT)	fdnG
pks-	pksNeg12	1609330	A>C	0.113	L90F (TTA→TTC)	yneJ
pks-	pksNeg12	1644507	T>A	0.121	pseudogene (173/765 nt)	ydfE
pks-	pksNeg12	2165296	T>C	0.071	intergenic (‑88/+18)	gatR / gatD
pks-	pksNeg12	2749228	G>T	0.06	intergenic (+491/‑290)	smpB / intA
pks-	pksNeg12	2811683	G>A	0.056	intergenic (‑50/+149)	argY / argV
pks-	pksNeg12	3311270	G>A	0.231	R32R (CGC→CGT)	rimP
pks-	pksNeg12	4143544	C>T	0.072	intergenic (‑518/+80)	ppc / argE
pks-	pksNeg12	4143586	C>T	0.075	intergenic (‑560/+38)	ppc / argE
pks-	pksNeg12	4315905	T>G	0.058	intergenic (‑347/+311)	yjdN / yjdM
