# Supplementary material for: Colibactin leads to a bacteria-specific mutation pattern and self-inflicted DNA damage
Source: HighWire-hosted journal article supplement (doi:10.1101/gr.279517.124), 2024-08-01
Supplement: Supplemental_Code.zip [file fimo.xlsx]

## Sheet: fimo
motif_id	motif_alt_id	sequence_name	start	stop	strand	score	p-value	q-value	matched_sequence
2-CATAATTATTACC	STREME-2	149	1	13	+	24.4379	1.29e-08	2.17e-06	cataatTattacc
3-ATTTTTTCAGTT	STREME-3	60	2	13	+	22.6036	5.07e-08	2.32e-05	attttTtcagtt
5-AWGTTTTSKR	STREME-5	99	4	13	+	15.379	9.14e-07	0.000996	atgTtttcgg
4-ACGAATGAAH	STREME-4	96	2	11	+	15.9597	2.67e-06	0.00124	acgaaTgaac
4-ACGAATGAAH	STREME-4	95	4	13	+	15.9597	2.67e-06	0.00124	acgAatgaac
1-ADAAAATTWH	STREME-1	151	1	10	+	13.241	3.28e-06	0.00114	aaaaaaTtac
1-ADAAAATTWH	STREME-1	1	1	10	+	13.241	3.28e-06	0.00114	aaaaaaTtac
5-AWGTTTTSKR	STREME-5	97	2	11	-	14.129	7.17e-06	0.0039	AAGTTTTGGG
1-ADAAAATTWH	STREME-1	131	4	13	+	12.6506	9.7e-06	0.0016	aaaAaatttt
1-ADAAAATTWH	STREME-1	31	1	10	-	12.6506	9.7e-06	0.0016	AAAAAATTTT
2-CATAATTATTACC	STREME-2	42	1	13	-	14.5325	9.87e-06	0.000829	CATAATGATTGCC
4-ACGAATGAAH	STREME-4	127	3	12	+	13.9919	1.25e-05	0.00386	acgaAtgcat
1-ADAAAATTWH	STREME-1	65	1	10	-	12.2169	1.38e-05	0.0016	AGAAAATTGC
1-ADAAAATTWH	STREME-1	93	4	13	-	12.2169	1.38e-05	0.0016	AGAAAATTGC
6-CCYKGACM	STREME-6	123	5	12	+	12.3548	1.65e-05	0.0317	ccTggacc
1-ADAAAATTWH	STREME-1	64	1	10	-	12.0482	2.13e-05	0.00211	GAAAAATTAC
4-ACGAATGAAH	STREME-4	49	3	12	+	13.0645	2.59e-05	0.00537	acaaAtgatt
1-ADAAAATTWH	STREME-1	125	4	13	+	11.8193	3.12e-05	0.0024	acaAaattaa
1-ADAAAATTWH	STREME-1	85	4	13	+	11.8193	3.12e-05	0.0024	acaAaattaa
4-ACGAATGAAH	STREME-4	21	2	11	-	12.6855	3.21e-05	0.00537	CCGAAAGAAT
4-ACGAATGAAH	STREME-4	98	4	13	+	12.4839	3.47e-05	0.00537	actAatgata
5-AWGTTTTSKR	STREME-5	22	3	12	-	12.3548	3.57e-05	0.0129	AAGTTTTATG
1-ADAAAATTWH	STREME-1	73	1	10	-	11.6627	3.88e-05	0.00242	TGAAAATTAC
2-CATAATTATTACC	STREME-2	75	1	13	-	9.65089	3.94e-05	0.00221	AATATTTATTGCC
1-ADAAAATTWH	STREME-1	34	1	10	-	11.6265	4.04e-05	0.00242	AGAAAATAAA
1-ADAAAATTWH	STREME-1	135	1	10	-	11.506	4.54e-05	0.00242	AAAAAATCAT
1-ADAAAATTWH	STREME-1	54	1	10	-	11.506	4.54e-05	0.00242	AAAAAATCAT
4-ACGAATGAAH	STREME-4	87	1	10	+	12.1048	4.64e-05	0.00615	cggaatGaaa
6-CCYKGACM	STREME-6	119	4	11	-	12.0242	4.95e-05	0.0475	CCTGGACA
1-ADAAAATTWH	STREME-1	46	4	13	-	11.3614	5.67e-05	0.00255	GTAAAATTAA
5-AWGTTTTSKR	STREME-5	88	4	13	+	11.7258	5.7e-05	0.0134	atgTtttgca
1-ADAAAATTWH	STREME-1	155	4	13	+	11.3133	6e-05	0.00255	ataAaattga
1-ADAAAATTWH	STREME-1	167	4	13	+	11.3012	6.08e-05	0.00255	agaAaatctc
5-AWGTTTTSKR	STREME-5	14	2	11	+	11.6855	6.14e-05	0.0134	aagtaTtcga
1-ADAAAATTWH	STREME-1	26	4	13	+	11.2169	6.59e-05	0.00255	agaAaatctt
1-ADAAAATTWH	STREME-1	48	1	10	+	11.1566	7.01e-05	0.00255	cgaaaaTtaa
1-ADAAAATTWH	STREME-1	137	4	13	+	11.0843	7.17e-05	0.00255	aaaAaatctc
1-ADAAAATTWH	STREME-1	29	1	10	-	11.0723	7.34e-05	0.00255	CAAAAATTAC
1-ADAAAATTWH	STREME-1	129	4	13	+	11	7.84e-05	0.00259	aaaAaatctt
1-ADAAAATTWH	STREME-1	25	4	13	+	10.9398	8.57e-05	0.00261	taaAaatttc
1-ADAAAATTWH	STREME-1	152	4	13	+	10.9277	8.67e-05	0.00261	ggaAaattcc
5-AWGTTTTSKR	STREME-5	54	4	13	+	11.0484	9.41e-05	0.0171	attTtttccg
3-ATTTTTTCAGTT	STREME-3	148	1	12	-	7.81657	9.62e-05	0.022	CTATTTTCATTT
1-ADAAAATTWH	STREME-1	59	4	13	+	10.759	0.000104	0.003	gcaAaattac
1-ADAAAATTWH	STREME-1	30	1	10	-	10.6747	0.00011	0.00305	GCAAAATTAT
6-CCYKGACM	STREME-6	10	1	8	-	11.4677	0.000129	0.0783	CCCTGACA
5-AWGTTTTSKR	STREME-5	21	2	11	+	10.379	0.000139	0.0188	attctTtcgg
1-ADAAAATTWH	STREME-1	165	4	13	+	10.4217	0.00014	0.00356	agaAaatacc
1-ADAAAATTWH	STREME-1	166	1	10	+	10.3855	0.000146	0.00356	ctaaaaTtaa
1-ADAAAATTWH	STREME-1	141	4	13	+	10.3855	0.000146	0.00356	ttaAaatttc
1-ADAAAATTWH	STREME-1	170	1	10	+	10.3494	0.000149	0.00356	aaaaaaTcgc
5-AWGTTTTSKR	STREME-5	135	4	13	+	10.1935	0.000156	0.0188	attTtttctc
5-AWGTTTTSKR	STREME-5	31	4	13	+	10.1935	0.000156	0.0188	attTtttcca
1-ADAAAATTWH	STREME-1	27	4	13	+	10.3012	0.000156	0.00362	ttaAaatttt
6-CCYKGACM	STREME-6	100	6	13	+	10.7581	0.000163	0.0783	cCcggacg
1-ADAAAATTWH	STREME-1	81	4	13	-	10.1928	0.000175	0.00391	AGTAAATTAT
1-ADAAAATTWH	STREME-1	72	1	10	-	10.1687	0.000181	0.00394	AAAAAATCCT
1-ADAAAATTWH	STREME-1	94	1	10	+	10.0602	0.000199	0.00411	ggaaaaTatc
1-ADAAAATTWH	STREME-1	24	1	10	-	10.0241	0.000207	0.00411	GTAAAATTCA
1-ADAAAATTWH	STREME-1	74	1	10	-	9.98795	0.00021	0.00411	ATAAATTTAA
1-ADAAAATTWH	STREME-1	17	1	10	-	9.9759	0.000213	0.00411	GGAAAATATT
1-ADAAAATTWH	STREME-1	69	4	13	+	9.86747	0.000228	0.00427	cgaAaattct
5-AWGTTTTSKR	STREME-5	134	4	13	+	9.46774	0.000237	0.0235	atgTtgactg
5-AWGTTTTSKR	STREME-5	85	1	10	-	9.46774	0.000237	0.0235	ATTTTGTGGG
2-CATAATTATTACC	STREME-2	98	1	13	-	4.75148	0.000258	0.0108	TATCATTAGTACG
1-ADAAAATTWH	STREME-1	32	4	13	+	9.66265	0.000266	0.00486	taaAaatcaa
6-CCYKGACM	STREME-6	82	4	11	+	9.97581	0.000274	0.104	actTgacc
1-ADAAAATTWH	STREME-1	67	1	10	-	9.61446	0.00028	0.00498	ATAAATTTTC
1-ADAAAATTWH	STREME-1	136	4	13	+	9.56627	0.000289	0.00501	tcaAaatttt
1-ADAAAATTWH	STREME-1	45	1	10	+	9.42169	0.000319	0.0052	agaaatTtca
1-ADAAAATTWH	STREME-1	67	1	10	+	9.39759	0.000322	0.0052	gaaaatTtat
1-ADAAAATTWH	STREME-1	70	4	13	+	9.39759	0.000322	0.0052	aaaAagttta
6-CCYKGACM	STREME-6	37	1	8	-	9.68548	0.000324	0.104	CCCGGAGC
3-ATTTTTTCAGTT	STREME-3	21	2	13	+	7.74556	0.000351	0.0329	attctTtcggtc
3-ATTTTTTCAGTT	STREME-3	51	1	12	+	2.93491	0.000359	0.0329	attattTatttt
3-ATTTTTTCAGTT	STREME-3	25	1	12	-	2.93491	0.000359	0.0329	AAATTTTTAATT
5-AWGTTTTSKR	STREME-5	133	3	12	-	8.49194	0.000371	0.0336	ATTCTTTCGC
1-ADAAAATTWH	STREME-1	63	1	10	-	9.10843	0.00039	0.00615	GCAAAATCAC
5-AWGTTTTSKR	STREME-5	141	2	11	-	8.26613	0.000406	0.034	AATTTTAAGG
4-ACGAATGAAH	STREME-4	133	3	12	+	6.75806	0.000408	0.0473	gcgaAagaat
1-ADAAAATTWH	STREME-1	138	1	10	+	8.92771	0.00044	0.00675	gcaaaaTaaa
1-ADAAAATTWH	STREME-1	113	1	10	+	8.90361	0.000447	0.00675	aaaaaaTctg
5-AWGTTTTSKR	STREME-5	29	3	12	+	7.91129	0.000463	0.036	aattTttgcc
1-ADAAAATTWH	STREME-1	66	1	10	+	8.84337	0.000468	0.00691	ataaagTtta
1-ADAAAATTWH	STREME-1	78	4	13	+	8.79518	0.000481	0.00696	gtaAatttaa
1-ADAAAATTWH	STREME-1	71	1	10	+	8.74699	0.000496	0.00702	ataaatTtga
1-ADAAAATTWH	STREME-1	144	4	13	-	8.71084	0.000508	0.00706	AAAAAGTTGT
1-ADAAAATTWH	STREME-1	148	4	13	+	8.63855	0.000525	0.00714	tgaAaatagt
1-ADAAAATTWH	STREME-1	156	4	13	-	8.56627	0.000546	0.00728	AGAATATTGC
1-ADAAAATTWH	STREME-1	52	4	13	+	8.53012	0.000559	0.00731	ggaAtattat
5-AWGTTTTSKR	STREME-5	33	3	12	+	7.41129	0.000587	0.0426	aattTtaatg
1-ADAAAATTWH	STREME-1	78	3	12	+	8.44578	0.000592	0.00761	ggtaAattta
1-ADAAAATTWH	STREME-1	78	4	13	-	8.3253	0.000648	0.00781	TTAAATTTAC
1-ADAAAATTWH	STREME-1	11	1	10	+	8.31325	0.000652	0.00781	cgaaaaTcgt
1-ADAAAATTWH	STREME-1	51	1	10	-	8.27711	0.000664	0.00781	AATAAATAAT
1-ADAAAATTWH	STREME-1	67	2	11	-	8.27711	0.000664	0.00781	GATAAATTTT
1-ADAAAATTWH	STREME-1	116	4	13	-	8.27711	0.000664	0.00781	AATAAATCAA
1-ADAAAATTWH	STREME-1	74	1	10	+	8.24096	0.000681	0.00781	ttaaatTtat
1-ADAAAATTWH	STREME-1	74	2	11	-	8.22892	0.000686	0.00781	GATAAATTTA
1-ADAAAATTWH	STREME-1	55	4	13	-	8.15663	0.000713	0.00782	ACAAAGTTTT
1-ADAAAATTWH	STREME-1	57	4	13	+	8.14458	0.000717	0.00782	tgaAaattcg
3-ATTTTTTCAGTT	STREME-3	92	1	12	-	2.86982	0.000717	0.0548	ATTATTTCTTTC
1-ADAAAATTWH	STREME-1	90	4	13	-	8.12048	0.000726	0.00782	AAAATATTCA
1-ADAAAATTWH	STREME-1	169	4	13	+	8.10843	0.000733	0.00782	ggaAtatttc
5-AWGTTTTSKR	STREME-5	53	3	12	-	6.64516	0.000795	0.0541	AAATTTTGGG
1-ADAAAATTWH	STREME-1	94	3	12	+	7.85542	0.000835	0.00878	aaaaTatcat
1-ADAAAATTWH	STREME-1	48	2	11	+	7.78313	0.000868	0.00892	gaaaaTtaac
1-ADAAAATTWH	STREME-1	75	4	13	+	7.77108	0.000877	0.00892	aatAaatatt
5-AWGTTTTSKR	STREME-5	24	3	12	+	6.32258	0.000895	0.0557	aattTtaccc
1-ADAAAATTWH	STREME-1	161	4	13	+	7.72289	0.000901	0.00892	attAaataat
1-ADAAAATTWH	STREME-1	126	4	13	+	7.72289	0.000901	0.00892	gttAaatttt
1-ADAAAATTWH	STREME-1	52	4	13	-	7.6988	0.000914	0.00892	ATAATATTCC
1-ADAAAATTWH	STREME-1	45	1	10	-	7.6747	0.000926	0.00892	TGAAATTTCT
1-ADAAAATTWH	STREME-1	153	1	10	+	7.6506	0.000938	0.00892	gaaaatTaaa
5-AWGTTTTSKR	STREME-5	60	2	11	+	6.06452	0.000964	0.0557	attttTtcag
1-ADAAAATTWH	STREME-1	1	2	11	+	7.50602	0.00101	0.00911	aaaaaTtaca
1-ADAAAATTWH	STREME-1	151	2	11	+	7.50602	0.00101	0.00911	aaaaaTtaca
1-ADAAAATTWH	STREME-1	71	1	10	-	7.50602	0.00101	0.00911	TCAAATTTAT
1-ADAAAATTWH	STREME-1	81	3	12	+	7.49398	0.00101	0.00911	aataAtttac
1-ADAAAATTWH	STREME-1	140	1	10	-	7.46988	0.00102	0.00911	TCAAAATTTG
2-CATAATTATTACC	STREME-2	149	1	13	-	-0.136095	0.00103	0.0345	GGTAATAATTATG
5-AWGTTTTSKR	STREME-5	91	4	13	+	5.95161	0.00103	0.0557	atgTttgccg
1-ADAAAATTWH	STREME-1	90	4	13	+	7.42169	0.00104	0.00916	tgaAtatttt
1-ADAAAATTWH	STREME-1	33	1	10	-	7.37349	0.00107	0.00924	TTAAAATTCG
1-ADAAAATTWH	STREME-1	147	1	10	+	7.3494	0.00108	0.00924	cgaaatTtga
3-ATTTTTTCAGTT	STREME-3	140	2	13	+	2.86391	0.0011	0.0718	aaattTtgaggt
5-AWGTTTTSKR	STREME-5	75	1	10	-	5.75	0.00111	0.0557	ATTTATTGCC
1-ADAAAATTWH	STREME-1	77	1	10	+	7.22892	0.00114	0.00957	ggaaagTaaa
1-ADAAAATTWH	STREME-1	15	4	13	-	7.22892	0.00114	0.00957	ATAAATTCGC
5-AWGTTTTSKR	STREME-5	144	1	10	-	5.6129	0.00122	0.0557	AAGTTGTCAG
1-ADAAAATTWH	STREME-1	166	2	11	+	7.09639	0.00123	0.00991	taaaaTtaat
1-ADAAAATTWH	STREME-1	19	4	13	+	7.09639	0.00123	0.00991	ggaAaatccg
1-ADAAAATTWH	STREME-1	53	4	13	+	7.09639	0.00123	0.00991	ccaAaatttg
4-ACGAATGAAH	STREME-4	42	4	13	-	4.20161	0.00123	0.127	CATAATGATT
1-ADAAAATTWH	STREME-1	169	4	13	-	7.06024	0.00125	0.00993	GAAATATTCC
1-ADAAAATTWH	STREME-1	46	3	12	-	7.04819	0.00126	0.00993	TAAAATTAAA
5-AWGTTTTSKR	STREME-5	26	1	10	-	5.39516	0.00127	0.0557	ATTTTCTCGG
1-ADAAAATTWH	STREME-1	12	4	13	+	7.0241	0.00127	0.00993	cgaAattaac
1-ADAAAATTWH	STREME-1	83	1	10	-	7	0.00129	0.00993	AAAAAGTACC
5-AWGTTTTSKR	STREME-5	72	4	13	+	5.20968	0.00134	0.0557	attTtttctt
5-AWGTTTTSKR	STREME-5	131	1	10	-	5.20968	0.00134	0.0557	ATTTTTTCAA
5-AWGTTTTSKR	STREME-5	129	1	10	-	5.20968	0.00134	0.0557	ATTTTTTCAA
5-AWGTTTTSKR	STREME-5	137	1	10	-	5.20968	0.00134	0.0557	ATTTTTTCTT
1-ADAAAATTWH	STREME-1	27	4	13	-	6.89157	0.00135	0.0103	AAAATTTTAA
5-AWGTTTTSKR	STREME-5	17	2	11	+	5.15323	0.00138	0.0557	atattTtcca
4-ACGAATGAAH	STREME-4	145	1	10	+	3.68548	0.00142	0.132	agaaagGaaa
5-AWGTTTTSKR	STREME-5	136	1	10	-	5.08065	0.00146	0.0568	ATTTTGAGGC
3-ATTTTTTCAGTT	STREME-3	16	1	12	+	2.85799	0.00147	0.0839	gttttcTcattg
1-ADAAAATTWH	STREME-1	81	3	12	-	6.63855	0.00151	0.0114	GTAAATTATT
1-ADAAAATTWH	STREME-1	89	4	13	-	6.60241	0.00153	0.0114	AGAATGTTAC
1-ADAAAATTWH	STREME-1	124	1	10	-	6.56627	0.00156	0.0115	CATAAATTGT
5-AWGTTTTSKR	STREME-5	42	4	13	+	4.85484	0.0016	0.0595	aatCattatg
5-AWGTTTTSKR	STREME-5	66	4	13	+	4.81452	0.00164	0.0595	aagTttattg
1-ADAAAATTWH	STREME-1	31	1	10	+	6.43373	0.00167	0.012	aaaattTttt
1-ADAAAATTWH	STREME-1	131	4	13	-	6.43373	0.00167	0.012	AAAATTTTTT
1-ADAAAATTWH	STREME-1	68	4	13	+	6.37349	0.00171	0.0122	gcaAaatatg
1-ADAAAATTWH	STREME-1	166	2	11	-	6.3012	0.00176	0.0124	ATTAATTTTA
5-AWGTTTTSKR	STREME-5	149	4	13	+	4.49194	0.0018	0.0633	aatTattacc
6-CCYKGACM	STREME-6	39	2	9	+	4.54032	0.00201	0.551	cctggCca
5-AWGTTTTSKR	STREME-5	59	2	11	-	4.20161	0.00202	0.0668	AATTTTGCGA
5-AWGTTTTSKR	STREME-5	152	2	11	-	4.20161	0.00202	0.0668	AATTTTCCTG
4-ACGAATGAAH	STREME-4	54	4	13	-	2.41935	0.00207	0.157	CGGAAAAAAT
4-ACGAATGAAH	STREME-4	99	4	13	-	2.3629	0.00212	0.157	CCGAAAACAT
1-ADAAAATTWH	STREME-1	141	4	13	-	5.6988	0.00221	0.0154	GAAATTTTAA
1-ADAAAATTWH	STREME-1	156	4	13	+	5.68675	0.00222	0.0154	gcaAtattct
5-AWGTTTTSKR	STREME-5	86	2	11	+	4.08871	0.00223	0.0713	aagaaTtggg
1-ADAAAATTWH	STREME-1	136	4	13	-	5.6506	0.00224	0.0154	AAAATTTTGA
4-ACGAATGAAH	STREME-4	92	4	13	+	2.16129	0.00229	0.157	agaAataatc
4-ACGAATGAAH	STREME-4	12	4	13	+	2.10484	0.00237	0.157	cgaAattaac
1-ADAAAATTWH	STREME-1	24	1	10	+	5.44578	0.00239	0.0163	tgaattTtac
5-AWGTTTTSKR	STREME-5	64	3	12	+	3.83871	0.00241	0.0749	aattTttcac
1-ADAAAATTWH	STREME-1	1	2	11	-	5.3253	0.00249	0.0165	TGTAATTTTT
1-ADAAAATTWH	STREME-1	151	2	11	-	5.3253	0.00249	0.0165	TGTAATTTTT
1-ADAAAATTWH	STREME-1	126	4	13	-	5.3253	0.00249	0.0165	AAAATTTAAC
6-CCYKGACM	STREME-6	158	4	11	-	4.25806	0.0025	0.6	CCCTGAAA
3-ATTTTTTCAGTT	STREME-3	27	1	12	+	-2.01183	0.00256	0.113	tttttaAaattt
1-ADAAAATTWH	STREME-1	62	4	13	+	5.25301	0.00256	0.0166	ggtAaatcag
1-ADAAAATTWH	STREME-1	48	2	11	-	5.24096	0.00257	0.0166	GTTAATTTTC
1-ADAAAATTWH	STREME-1	30	1	10	+	5.22892	0.00258	0.0166	ataattTtgc
1-ADAAAATTWH	STREME-1	25	4	13	-	5.19277	0.00262	0.0167	GAAATTTTTA
5-AWGTTTTSKR	STREME-5	29	4	13	+	3.50806	0.00269	0.0811	attTttgccg
3-ATTTTTTCAGTT	STREME-3	161	2	13	-	-2.01775	0.00272	0.113	ATTATTTAATCA
3-ATTTTTTCAGTT	STREME-3	160	2	13	-	-2.01775	0.00272	0.113	AATTTTCATATT
5-AWGTTTTSKR	STREME-5	127	3	12	-	3.45161	0.00276	0.0811	ATGCATTCGT
2-CATAATTATTACC	STREME-2	94	1	13	-	-0.248521	0.00284	0.0681	GATGATATTTTCC
2-CATAATTATTACC	STREME-2	83	1	13	-	-0.248521	0.00284	0.0681	AACAAAAAGTACC
1-ADAAAATTWH	STREME-1	33	1	10	+	4.93976	0.00284	0.0179	cgaattTtaa
1-ADAAAATTWH	STREME-1	67	2	11	+	4.81928	0.00294	0.0184	aaaatTtatc
1-ADAAAATTWH	STREME-1	64	1	10	+	4.77108	0.00298	0.0185	gtaattTttc
# FIMO (Find Individual Motif Occurrences): Version 5.5.1 compiled on Feb 28 2023 at 21:01:43
# The format of this file is described at https://meme-suite.org/meme/doc/fimo-output-format.html.
# fimo --thresh 3e-3 --bfile --motif-- streme.txt pks+_context_5.txt
