# Supplementary material for: Colibactin leads to a bacteria-specific mutation pattern and self-inflicted DNA damage
Source: HighWire-hosted journal article supplement (doi:10.1101/gr.279517.124), 2024-08-01
Supplement: Supplemental_Code.zip [file genomeFeatures.xlsx]

## Sheet: Sheet1
feature	start	end	middle
CP4-6	262182	296489	279336
DLP12	564025	585326	574676
e14	1195443	1210635	1203039
rac	1409923	1432982	1.42145e+06
Qin	1630310	1650767	1.64054e+06
CP4-44	2063904	2077055	2.07048e+06
CPS-53	2464407	2474621	2469514
CPZ-55	2556721	2563483	2560102
CP4-57	2753979	2776008	2.76499e+06
ori	3924	4023	3973.5
terA	1586000	1586020	1586010
terB	1544000	1544020	1544010
terC	1510000	1586020	1548010
terD	1475000	1475020	1475010
