# Supplementary material for: Colibactin leads to a bacteria-specific mutation pattern and self-inflicted DNA damage
Source: HighWire-hosted journal article supplement (doi:10.1101/gr.279517.124), 2024-08-01
Supplement: Supplemental_Code.zip [file macrodomain_positions.xlsx]

## Sheet: Sheet1
domain	start	end
ori	1	220257
looseRight	220258	665000
right	665001	1295438
ter	1295439	1793649
left	1793650	2722974
looseLeft	2722975	3420579
ori	3420580	4631445
