# Supplementary material for: Colibactin leads to a bacteria-specific mutation pattern and self-inflicted DNA damage
Source: HighWire-hosted journal article supplement (doi:10.1101/gr.279517.124), 2024-08-01
Supplement: Supplemental_Code.zip [file master_mutation_final.xlsx]

## Sheet: Sheet1
condition	sample	position	breseq_mutation	frequency	breseq_annotation	breseq_gene	gene	synonomous	upstream_sequence	downstream_sequence	sbs_mutation_context	mutation_type
pks+	pksPos11	158022	T>G	0.074	Y166S (TAC→TCC)	ligT	ligT	nonsynonymous	GGCGTG	AGCGTG	ggcgtgTagcgtg	sbs
pks+	pksPos11	357551	T>G	0.255	E7D (GAA→GAC)	lacA	lacA	nonsynonymous	TATTCT	TCGGTC	tattctTtcggtc	sbs
pks+	pksPos11	368544	T>C	0.057	H56H (CAT→CAC)	mhpF	mhpF	synonymous	CACCCA	GAAGGG	cacccaTgaaggg	sbs
pks+	pksPos11	592122	A>C	0.268	E356A (GAA→GCA)	cusC	cusC	nonsynonymous	TCGCCG	AATTCG	tcgccgAaattcg	sbs
pks+	pksPos11	1059765	A>T	0.271	N92Y (AAT→TAT)	yccE	yccE	nonsynonymous	CGTACT	ATGATA	cgtactAatgata	sbs
pks+	pksPos11	1191676	C>T	1	H366H (CAC→CAT)	icd	icd	synonymous	GCGCCA	ATGGGT	gcgccaCatgggt	sbs
pks+	pksPos11	1191688	C>T	1	T370T (ACC→ACT)	icd	icd	synonymous	TTGGAC	GAAGCG	ttggacCgaagcg	sbs
pks+	pksPos11	1191701	T>C	1	L375M (TTA→CTG)	icd	icd	nonsynonymous	GCTGAC	TAATTG	gctgacTtaattg	sbs
pks+	pksPos11	1191703	A>G	1	L375M (TTA→CTG)	icd	icd	nonsynonymous	TGACTT	ATTGTT	tgacttAattgtt	sbs
pks+	pksPos11	1282493	C>T	0.056	intergenic (+511/+29)	narI / rttR			GATTCG	TTGAGA	gattcgCttgaga	sbs
pks+	pksPos11	1352520	G>T	0.326	H309N (CAT→AAT)	puuP	puuP	nonsynonymous	TGGCAT	TGAAGC	tggcatGtgaagc	sbs
pks+	pksPos11	1460896	C>T	0.056	pseudogene (1248/2513 nt)	ydbA	ydbA		GATTAA	GGTGAT	gattaaCggtgat	sbs
pks+	pksPos11	1463407	C>T	0.051	intergenic (‑1/‑91)	insC1 / ydbA			AATCAT	TGTTCT	aatcatCtgttct	sbs
pks+	pksPos11	1659760	G>T	0.248	A63A (GCG→GCT)	clcB	clcB	synonymous	ACTGGC	GCGGGT	actggcGgcgggt	sbs
pks+	pksPos11	1705533	A>C	0.227	E150A (GAA→GCA)	rsxE	rsxE	nonsynonymous	TACGCG	AATTAT	tacgcgAaattat	sbs
pks+	pksPos11	2298492	A>G	0.058	intergenic (+620/+95)	eco / mqo			GCATCC	ACATCT	gcatccAacatct	sbs
pks+	pksPos11	2359220	A>C	0.253	intergenic (‑121/‑187)	ais / arnB			GCCTCA	AATTTT	gcctcaAaatttt	sbs
pks+	pksPos11	2749579	C>T	0.051	A21V (GCC→GTC)	intA	intA	nonsynonymous	AAGATG	CGATTA	aagatgCcgatta	sbs
pks+	pksPos11	2848042	A>T	0.224	K116* (AAA→TAA)	fhlA	fhlA	nonsynonymous	TACCCA	AATTTG	tacccaAaatttg	sbs
pks+	pksPos11	2899745	T>A	0.17	F226I (TTT→ATT)	ygcG	ygcG	nonsynonymous	AAAATT	TTTCCA	aaaattTtttcca	sbs
pks+	pksPos11	4212306	T>A	0.144	K37I (AAA→ATA)	arpA	arpA	nonsynonymous	GAAAAT	TATCCT	gaaaatTtatcct	sbs
pks+	pksPos11	4245315	T>A	0.249	K360N (AAA→AAT)	plsB	plsB	nonsynonymous	ATAAAG	TTATTG	ataaagTttattg	sbs
pks+	pksPos12	405258	T>A	0.205	K73I (AAA→ATA)	rdgC	rdgC	nonsynonymous	AGGATT	TTTCTT	aggattTtttctt	sbs
pks+	pksPos12	1066133	A>T	0.096	F93L (TTT→TTA)	rutE	rutE	nonsynonymous	TTCATA	AATTCA	ttcataAaattca	sbs
pks+	pksPos12	1191676	C>T	0.752	H366H (CAC→CAT)	icd	icd	synonymous	GCGCCA	ATGGGT	gcgccaCatgggt	sbs
pks+	pksPos12	1191688	C>T	0.76	T370T (ACC→ACT)	icd	icd	synonymous	TTGGAC	GAAGCG	ttggacCgaagcg	sbs
pks+	pksPos12	1191701	T>C	0.739	L375L (TTA→CTA) ‡	icd	icd	synonymous	GCTGAC	TAATTG	gctgacTtaattg	sbs
pks+	pksPos12	1191703	A>G	0.739	L375L (TTA→TTG) ‡	icd	icd	synonymous	TGACTT	ATTGTT	tgacttAattgtt	sbs
pks+	pksPos12	1191733	C>T	0.511	N385N (AAC→AAT)	icd	icd	synonymous	AATCAA	GCGAAA	aatcaaCgcgaaa	sbs
pks+	pksPos12	1191736	G>C	0.511	A386A (GCG→GCC)	icd	icd	synonymous	CAACGC	AAAACC	caacgcGaaaacc	sbs
pks+	pksPos12	1191739	A>G	0.535	K387K (AAA→AAG)	icd	icd	synonymous	CGCGAA	ACCGTA	cgcgaaAaccgta	sbs
pks+	pksPos12	1191748	C>T	0.355	T390T (ACC→ACT)	icd	icd	synonymous	CGTAAC	TATGAC	cgtaacCtatgac	sbs
pks+	pksPos12	1191760	G>A	0.31	E394E (GAG→GAA)	icd	icd	synonymous	CTTCGA	CGTCTG	cttcgaGcgtctg	sbs
pks+	pksPos12	1282617	G>A	0.065	noncoding (76/171 nt) Q6* (CAA→TAA)	rttR tpr	rttR tpr		AACCTT	GTCGAA	aaccttGgtcgaa	sbs
pks+	pksPos12	1369305	T>A	0.211	I29N (ATC→AAC)	ycjQ	ycjQ	nonsynonymous	TGAAGA	CCGCGT	tgaagaTccgcgt	sbs
pks+	pksPos12	1460467	G>A	0.051	pseudogene (819/2513 nt)	ydbA	ydbA		CAGCGC	ACGGTG	cagcgcGacggtg	sbs
pks+	pksPos12	1460593	C>G	0.054	pseudogene (945/2513 nt)	ydbA	ydbA		CGGCAC	CAGATT	cggcacCcagatt	sbs
pks+	pksPos12	1460602	T>C	0.063	pseudogene (954/2513 nt)	ydbA	ydbA		GATTAA	GGTGAT	gattaaTggtgat	sbs
pks+	pksPos12	1460896	C>T	0.057	pseudogene (1248/2513 nt)	ydbA	ydbA		GATTAA	GGTGAT	gattaaCggtgat	sbs
pks+	pksPos12	1559158	A>T	0.251	I278N (ATT→AAT)	dosP	dosP	nonsynonymous	CGACAA	TGATTT	cgacaaAtgattt	sbs
pks+	pksPos12	1625441	A>T	0.132	pseudogene (1102/1284 nt)	ydfJ	ydfJ		TGCAGA	AATACC	tgcagaAaatacc	sbs
pks+	pksPos12	1653856	A>T	0.301	K511* (AAA→TAA)	ynfE	ynfE	nonsynonymous	TCGGCA	AATATG	tcggcaAaatatg	sbs
pks+	pksPos12	1798904	T>A	0.177	pseudogene (1130/1476 nt)	arpB	arpB		CTAAAA	TAATGG	ctaaaaTtaatgg	sbs
pks+	pksPos12	1805767	T>A	0.322	F193I (TTT→ATT)	ydjN	ydjN	nonsynonymous	GTAATT	TTGCCG	gtaattTttgccg	sbs
pks+	pksPos12	1965876	T>A	0.165	K358I (AAA→ATA)	tar	tar	nonsynonymous	GCAATT	TCTTCG	gcaattTtcttcg	sbs
pks+	pksPos12	2870027	G>A	0.227	G30S (GGC→AGC)	iap	iap	nonsynonymous	AAACCT	GCGATT	aaacctGgcgatt	sbs
pks+	pksPos12	2877814	A>T	0.228	intergenic (‑317/+98)	casA / ygcB			ACCGGG	AATTAA	accgggAaattaa	sbs
pks+	pksPos12	3460386	A>T	0.232	intergenic (‑36/+133)	bfd / chiA			AAATGA	AATAGT	aaatgaAaatagt	sbs
pks+	pksPos12	3530093	A>T	0.261	intergenic (‑150/‑78)	ompR / greB			TCGGCG	AACATT	tcggcgAaacatt	sbs
pks+	pksPos12	3724260	T>C	0.333	intergenic (‑135/‑231)	xylA / xylF			GCAAAA	AAAATG	gcaaaaTaaaatg	sbs
pks+	pksPos12	3902529	A>T	0.145	L91M (TTG→ATG)	pstA	pstA	nonsynonymous	CCCACA	AATTAA	cccacaAaattaa	sbs
pks+	pksPos12	4441948	T>G	0.138	N358K (AAT→AAG)	ytfR	ytfR	nonsynonymous	GGAAAA	ATCATC	ggaaaaTatcatc	sbs
pks+	pksPos12	4527131	C>T	0.127	G94D (GGC→GAC)	nanS	nanS	nonsynonymous	GCCTGG	CAACGG	gcctggCcaacgg	sbs
pks+	pksPos3	384206	A>T	0.172	intergenic (+104/+3)	tauD / hemB			GAAACA	AATTAA	gaaacaAaattaa	sbs
pks+	pksPos3	1091101	A>C	0.224	pseudogene (141/342 nt)	ymdE	ymdE		CAAAGA	AATCTC	caaagaAaatctc	sbs
pks+	pksPos3	1191676	C>T	0.412	H366H (CAC→CAT)	icd	icd	synonymous	GCGCCA	ATGGGT	gcgccaCatgggt	sbs
pks+	pksPos3	1191688	C>T	0.337	T370T (ACC→ACT)	icd	icd	synonymous	TTGGAC	GAAGCG	ttggacCgaagcg	sbs
pks+	pksPos3	1191701	T>C	0.288	L375L (TTA→CTA) ‡	icd	icd	synonymous	GCTGAC	TAATTG	gctgacTtaattg	sbs
pks+	pksPos3	1191703	A>G	0.288	L375L (TTA→TTG) ‡	icd	icd	synonymous	TGACTT	ATTGTT	tgacttAattgtt	sbs
pks+	pksPos3	1191733	C>T	0.13	N385N (AAC→AAT)	icd	icd	synonymous	AATCAA	GCGAAA	aatcaaCgcgaaa	sbs
pks+	pksPos3	1191736	G>C	0.13	A386A (GCG→GCC)	icd	icd	synonymous	CAACGC	AAAACC	caacgcGaaaacc	sbs
pks+	pksPos3	1191739	A>G	0.125	K387K (AAA→AAG)	icd	icd	synonymous	CGCGAA	ACCGTA	cgcgaaAaccgta	sbs
pks+	pksPos3	1191748	C>T	0.075	T390T (ACC→ACT)	icd	icd	synonymous	CGTAAC	TATGAC	cgtaacCtatgac	sbs
pks+	pksPos3	1206880	T>C	0.25	pseudogene (12/165 nt)	icdC	icdC		GCGCCA	ATGGGT	gcgccaTatgggt	sbs
pks+	pksPos3	1206892	T>C	0.166	pseudogene (24/165 nt)	icdC	icdC		TTGGAC	GAAGCG	ttggacTgaagcg	sbs
pks+	pksPos3	1206905	C>T	0.129	pseudogene (37/165 nt)	icdC	icdC		GCTGAC	TGATTG	gctgacCtgattg	sbs
pks+	pksPos3	1206907	G>A	0.128	pseudogene (39/165 nt)	icdC	icdC		TGACCT	ATTGTT	tgacctGattgtt	sbs
pks+	pksPos3	1255796	A>T	0.266	F155Y (TTT→TAT)	dauA	dauA	nonsynonymous	CCGAGA	AATCTT	ccgagaAaatctt	sbs
pks+	pksPos3	1282249	A>G	0.051	intergenic (+267/+273)	narI / rttR			GCGCTC	AGTCGA	gcgctcAagtcga	sbs
pks+	pksPos3	1460458	T>C	0.057	pseudogene (810/2513 nt)	ydbA	ydbA		CACCGG	GACAGC	caccggTgacagc	sbs
pks+	pksPos3	1460467	G>A	0.06	pseudogene (819/2513 nt)	ydbA	ydbA		CAGCGC	ACGGTG	cagcgcGacggtg	sbs
pks+	pksPos3	1511558	T>G	0.199	intergenic (‑107/‑88)	yncL / ydcX			ATGATT	TTTCTC	atgattTtttctc	sbs
pks+	pksPos3	1641230	T>G	0.229	intergenic (+236/+201)	flxA / intK			CCAACT	CCGCTT	ccaactTccgctt	sbs
pks+	pksPos3	1708412	C>T	0.051	Q463* (CAG→TAG)	dtpA	dtpA	nonsynonymous	TTCTTG	AGATTG	ttcttgCagattg	sbs
pks+	pksPos3	1811712	A>T	0.204	I349N (ATT→AAT)	chbF	chbF	nonsynonymous	GCCGGA	TATTAT	gccggaAtattat	sbs
pks+	pksPos3	1928841	G>A	0.212	R7R (CGC→CGT)	edd	edd	synonymous	TGTTAC	CGTAAC	tgttacGcgtaac	sbs
pks+	pksPos3	2058694	A>T	0.274	L4I (TTA→ATA)	cobS	cobS	nonsynonymous	AAAATA	TTTACT	aaaataAtttact	sbs
pks+	pksPos3	2760974	A>G	0.201	intergenic (+260/‑95)	rnlB / yfjP			TTGAAA	AATCTT	ttgaaaAaatctt	sbs
pks+	pksPos3	3263401	T>G	0.084	intergenic (+440/+174)	yhaC / rnpB			GGACAG	CATTCA	ggacagTcattca	sbs
pks+	pksPos3	3575112	Δ1 bp	0.167	intergenic (+126/‑111)	yhhY / yhhZ						small_deletion
pks+	pksPos3	3757525	T>C	0.177	L661L (CTT→CTC)	rhsA	rhsA	synonymous	TGTACT	GACCGG	tgtactTgaccgg	sbs
pks+	pksPos3	3867374	T>A	0.27	D154V (GAT→GTT)	dgoK	dgoK	nonsynonymous	CGAAAA	CGTTGA	cgaaaaTcgttga	sbs
pks+	pksPos3	3872811	C>A	0.262	K223N (AAG→AAT)	gyrB	gyrB	nonsynonymous	GAACGC	TTGATG	gaacgcCttgatg	sbs
pks+	pksPos3	4165077	A>T	0.19	intergenic (‑123/‑239)	coaA / thrU			AAGAAA	AATCTC	aagaaaAaatctc	sbs
pks+	pksPos3	4400384	A>T	0.244	K5N (AAA→AAT)	yjfJ	yjfJ	nonsynonymous	TTTAAA	AGTTTA	tttaaaAagttta	sbs
pks+	pksPos4	405258	T>A	0.094	K73I (AAA→ATA)	rdgC	rdgC	nonsynonymous	AGGATT	TTTCTT	aggattTtttctt	sbs
pks+	pksPos4	503947	T>A	0.278	L92M (TTG→ATG)	ybaQ	ybaQ	nonsynonymous	GAAGAA	TGGGAC	gaagaaTtgggac	sbs
pks+	pksPos4	844989	T>C	0.263	I189V (ATT→GTT)	rhtA	rhtA	nonsynonymous	CGAAAA	TAACGC	cgaaaaTtaacgc	sbs
pks+	pksPos4	940942	T>A	0.147	L24F (TTA→TTT)	ycaC	ycaC	nonsynonymous	GGAAAG	AAACCA	ggaaagTaaacca	sbs
pks+	pksPos4	1066133	A>T	0.067	F93L (TTT→TTA)	rutE	rutE	nonsynonymous	TTCATA	AATTCA	ttcataAaattca	sbs
pks+	pksPos4	1165352	T>G	0.177	N160T (AAC→ACC)	ldtC	ldtC	nonsynonymous	CGGATG	TTGCCG	cggatgTttgccg	sbs
pks+	pksPos4	1191676	C>T	0.916	H366H (CAC→CAT)	icd	icd	synonymous	GCGCCA	ATGGGT	gcgccaCatgggt	sbs
pks+	pksPos4	1191688	C>T	0.901	T370T (ACC→ACT)	icd	icd	synonymous	TTGGAC	GAAGCG	ttggacCgaagcg	sbs
pks+	pksPos4	1191701	T>C	0.905	L375L (TTA→CTA) ‡	icd	icd	synonymous	GCTGAC	TAATTG	gctgacTtaattg	sbs
pks+	pksPos4	1191703	A>G	0.905	L375L (TTA→TTG) ‡	icd	icd	synonymous	TGACTT	ATTGTT	tgacttAattgtt	sbs
pks+	pksPos4	1389968	T>A	0.245	K71I (AAA→ATA)	ynaI	ynaI	nonsynonymous	ATAAAT	TGAGTT	ataaatTtgagtt	sbs
pks+	pksPos4	1460695	T>G	0.051	pseudogene (1047/2513 nt)	ydbA	ydbA		AAAAGT	ATTCAG	aaaagtTattcag	sbs
pks+	pksPos4	1460896	C>T	0.061	pseudogene (1248/2513 nt)	ydbA	ydbA		GATTAA	GGTGAT	gattaaCggtgat	sbs
pks+	pksPos4	1527816	T>G	0.141	K98T (AAA→ACA)	yddH	yddH	nonsynonymous	TTAAAT	TATCTT	ttaaatTtatctt	sbs
pks+	pksPos4	1805767	T>A	0.108	F193I (TTT→ATT)	ydjN	ydjN	nonsynonymous	GTAATT	TTGCCG	gtaattTttgccg	sbs
pks+	pksPos4	1829805	A>T	0.228	I12F (ATT→TTT)	ynjA	ynjA	nonsynonymous	CCTTTA	TTTTAC	cctttaAttttac	sbs
pks+	pksPos4	1845799	A>C	0.237	N228T (AAT→ACT)	ansA	ansA	nonsynonymous	TGCGCA	TTTTCT	tgcgcaAttttct	sbs
pks+	pksPos4	1965876	T>A	0.056	K358I (AAA→ATA)	tar	tar	nonsynonymous	GCAATT	TCTTCG	gcaattTtcttcg	sbs
pks+	pksPos4	1985925	C>A	0.117	W125L (TGG→TTG)	pgsA	pgsA	nonsynonymous	CCAATC	AGGAGA	ccaatcCaggaga	sbs
pks+	pksPos4	2033505	T>G	0.176	Y183D (TAT→GAT)	yedY	yedY	nonsynonymous	ACAATT	ATGCAC	acaattTatgcac	sbs
pks+	pksPos4	2033834	G>T	0.166	Q292H (CAG→CAT)	yedY	yedY	nonsynonymous	GTCACA	GCTACC	gtcacaGgctacc	sbs
pks+	pksPos4	2452117	A>T	0.323	L174L (CTT→CTA)	fadJ	fadJ	synonymous	CGCCCG	AGTTGT	cgcccgAagttgt	sbs
pks+	pksPos4	2582317	C>A	0.257	P455Q (CCA→CAA)	acrD	acrD	nonsynonymous	TTGTAC	AATGGC	ttgtacCaatggc	sbs
pks+	pksPos4	2582548	A>C	0.262	K532T (AAA→ACA)	acrD	acrD	nonsynonymous	TGGCGA	AATTCT	tggcgaAaattct	sbs
pks+	pksPos4	2725683	G>A	0.199	A617V (GCG→GTG)	clpB	clpB	nonsynonymous	GCCAGC	CCTTAC	gccagcGccttac	sbs
pks+	pksPos4	3048267	C>T	0.056	P179P (CCG→CCA)	ygfB	ygfB	synonymous	CGGTTG	GGATGA	cggttgCggatga	sbs
pks+	pksPos4	3724260	T>C	0.1	intergenic (‑135/‑231)	xylA / xylF			GCAAAA	AAAATG	gcaaaaTaaaatg	sbs
pks+	pksPos4	3792583	T>A	0.265	I30I (ATA→ATT)	waaU	waaU	synonymous	ATTATT	ATTTTA	attattTatttta	sbs
pks+	pksPos4	4143544	C>T	0.058	intergenic (‑518/+80)	ppc / argE			CGCAAG	ATCGCA	cgcaagCatcgca	sbs
pks+	pksPos4	4428152	T>A	0.178	F210Y (TTT→TAT)	ytfI	ytfI	nonsynonymous	ATAATT	TGCCAT	ataattTtgccat	sbs
pks+	pksPos4	4441948	T>G	0.076	N358K (AAT→AAG)	ytfR	ytfR	nonsynonymous	GGAAAA	ATCATC	ggaaaaTatcatc	sbs
pks+	pksPos4	4465616	T>C	0.184	I121I (ATT→ATC)	yjgL	yjgL	synonymous	AGAAAT	TCACTT	agaaatTtcactt	sbs
pks+	pksPos4	4603883	A>C	0.363	K196Q (AAA→CAA)	yjjV	yjjV	nonsynonymous	ATCGCA	AATTAC	atcgcaAaattac	sbs
pks+	pksPos5	355222	G>A	0.24	R8H (CGC→CAC)	cynS	cynS	nonsynonymous	TTAACC	CAATAT	ttaaccGcaatat	sbs
pks+	pksPos5	725098	C>T	0.124	V20V (GTC→GTT)	rhsC	rhsC	synonymous	CATTGT	CAGGGT	cattgtCcagggt	sbs
pks+	pksPos5	725116	A>G	0.164	V26V (GTA→GTG)	rhsC	rhsC	synonymous	CGGGGT	CGCATC	cggggtAcgcatc	sbs
pks+	pksPos5	727315	T>C	0.202	H759H (CAT→CAC)	rhsC	rhsC	synonymous	GCATCA	CCGCAG	gcatcaTccgcag	sbs
pks+	pksPos5	727325	A>G	0.187	N763D (AAT→GAT) ‡	rhsC	rhsC	nonsynonymous	CAGACG	ATGAAC	cagacgAatgaac	sbs
pks+	pksPos5	727327	T>A	0.187	N763K (AAT→AAA) ‡	rhsC	rhsC	nonsynonymous	GACGAA	GAACTG	gacgaaTgaactg	sbs
pks+	pksPos5	727329	A>C	0.188	E764A (GAA→GCA)	rhsC	rhsC	nonsynonymous	CGAATG	ACTGCT	cgaatgAactgct	sbs
pks+	pksPos5	727369	A>G	0.107	A777A (GCA→GCG)	rhsC	rhsC	synonymous	CAACGC	CAGGGA	caacgcAcaggga	sbs
pks+	pksPos5	727375	A>G	0.108	G779G (GGA→GGG)	rhsC	rhsC	synonymous	ACAGGG	CTGGCG	acagggActggcg	sbs
pks+	pksPos5	773072	T>C	0.198	intergenic (+9/‑124)	tolA / tolB			GCGATG	TGACTG	gcgatgTtgactg	sbs
pks+	pksPos5	1191676	C>T	0.35	H366H (CAC→CAT)	icd	icd	synonymous	GCGCCA	ATGGGT	gcgccaCatgggt	sbs
pks+	pksPos5	1191688	C>T	0.281	T370T (ACC→ACT)	icd	icd	synonymous	TTGGAC	GAAGCG	ttggacCgaagcg	sbs
pks+	pksPos5	1191701	T>C	0.235	L375L (TTA→CTA) ‡	icd	icd	synonymous	GCTGAC	TAATTG	gctgacTtaattg	sbs
pks+	pksPos5	1191703	A>G	0.235	L375L (TTA→TTG) ‡	icd	icd	synonymous	TGACTT	ATTGTT	tgacttAattgtt	sbs
pks+	pksPos5	1191733	C>T	0.136	N385N (AAC→AAT)	icd	icd	synonymous	AATCAA	GCGAAA	aatcaaCgcgaaa	sbs
pks+	pksPos5	1191736	G>C	0.136	A386A (GCG→GCC)	icd	icd	synonymous	CAACGC	AAAACC	caacgcGaaaacc	sbs
pks+	pksPos5	1191739	A>G	0.15	K387K (AAA→AAG)	icd	icd	synonymous	CGCGAA	ACCGTA	cgcgaaAaccgta	sbs
pks+	pksPos5	1309017	A>T	0.26	F155L (TTT→TTA)	yciE	yciE	nonsynonymous	AATTAA	AATTTC	aattaaAaatttc	sbs
pks+	pksPos5	1319494	G>A	0.302	K164K (AAG→AAA)	yciQ	yciQ	synonymous	TTATAA	ACCCGT	ttataaGacccgt	sbs
pks+	pksPos5	1375394	T>A	0.299	pseudogene (317/957 nt)	ycjV	ycjV		AAAAAA	CGCCAA	aaaaaaTcgccaa	sbs
pks+	pksPos5	1460458	T>C	0.062	pseudogene (810/2513 nt)	ydbA	ydbA		CACCGG	GACAGC	caccggTgacagc	sbs
pks+	pksPos5	1460467	G>A	0.068	pseudogene (819/2513 nt)	ydbA	ydbA		CAGCGC	ACGGTG	cagcgcGacggtg	sbs
pks+	pksPos5	1636684	A>C	0.246	intergenic (+360/+62)	cspF / quuQ			TTGAAA	AATTTT	ttgaaaAaatttt	sbs
pks+	pksPos5	1703062	T>C	0.051	R629R (CGT→CGC)	rsxC	rsxC	synonymous	TGCCCG	GCCAAA	tgcccgTgccaaa	sbs
pks+	pksPos5	1703101	C>G	0.055	A642A (GCC→GCG)	rsxC	rsxC	synonymous	TAATGC	GAGCCA	taatgcCgagcca	sbs
pks+	pksPos5	1703104	G>A	0.063	E643E (GAG→GAA)	rsxC	rsxC	synonymous	TGCCGA	CCAGAA	tgccgaGccagaa	sbs
pks+	pksPos5	1773065	A>C	0.256	F165C (TTT→TGT)	ydiP	ydiP	nonsynonymous	TTTTTA	AATTTT	tttttaAaatttt	sbs
pks+	pksPos5	1916395	T>A	0.228	L6L (CTT→CTA)	yebW	yebW	synonymous	GGTACT	TTTGTT	ggtactTtttgtt	sbs
pks+	pksPos5	1932965	C>A	0.221	L354M (CTG→ATG)	pykA	pykA	nonsynonymous	CACCGT	TGGACG	caccgtCtggacg	sbs
pks+	pksPos5	2054607	A>C	0.265	L270V (TTA→GTA)	nac	nac	nonsynonymous	CGGGTA	ATTTAA	cgggtaAatttaa	sbs
pks+	pksPos5	2225534	T>G	0.263	F71C (TTT→TGT)	cdd	cdd	nonsynonymous	CGAATT	TAATGT	cgaattTtaatgt	sbs
pks+	pksPos5	2298128	C>T	0.075	intergenic (+256/+459)	eco / mqo			GTAGGT	GGATAA	gtaggtCggataa	sbs
pks+	pksPos5	2614301	A>T	0.184	intergenic (‑70/‑255)	upp / purM			GCGGCA	TATTCT	gcggcaAtattct	sbs
pks+	pksPos5	2731059	IS4 (+) +13 bp	0.294	intergenic (+54/‑33)	pheL / pheA						small_insertion
pks+	pksPos5	3263289	C>T	0.071	intergenic (+328/+286)	yhaC / rnpB			GACAGT	ATTCAT	gacagtCattcat	sbs
pks+	pksPos5	3326521	T>C	0.3	K97R (AAA→AGA)	rplU	rplU	nonsynonymous	GTAATT	TCACAT	gtaattTtcacat	sbs
pks+	pksPos5	3551499	T>A	0.275	intergenic (‑61/‑128)	rtcB / rtcR			GAAAAT	AAATAA	gaaaatTaaataa	sbs
pks+	pksPos5	3755626	T>C	0.092	I28I (ATT→ATC)	rhsA	rhsA	synonymous	GCGCAT	GGTGCC	gcgcatTggtgcc	sbs
pks+	pksPos5	3755668	A>G	0.065	G42G (GGA→GGG)	rhsA	rhsA	synonymous	CGGCGG	GTGACG	cggcggAgtgacg	sbs
pks+	pksPos5	3760532	G>A	0.261	R279H (CGT→CAT)	yibA	yibA	nonsynonymous	TGAAGC	TTCATA	tgaagcGttcata	sbs
pks+	pksPos5	3795181	A>T	0.308	F60Y (TTT→TAT)	waaJ	waaJ	nonsynonymous	ATATAA	AATCAA	atataaAaatcaa	sbs
pks+	pksPos6	1063730	A>T	0.137	intergenic (+20/+237)	ymdF / rutG			TGACGA	TGCATT	tgacgaAtgcatt	sbs
pks+	pksPos6	1191676	C>T	0.369	H366H (CAC→CAT)	icd	icd	synonymous	GCGCCA	ATGGGT	gcgccaCatgggt	sbs
pks+	pksPos6	1191688	C>T	0.275	T370T (ACC→ACT)	icd	icd	synonymous	TTGGAC	GAAGCG	ttggacCgaagcg	sbs
pks+	pksPos6	1191701	T>C	0.256	L375L (TTA→CTA) ‡	icd	icd	synonymous	GCTGAC	TAATTG	gctgacTtaattg	sbs
pks+	pksPos6	1191703	A>G	0.256	L375L (TTA→TTG) ‡	icd	icd	synonymous	TGACTT	ATTGTT	tgacttAattgtt	sbs
pks+	pksPos6	1191733	C>T	0.127	N385N (AAC→AAT)	icd	icd	synonymous	AATCAA	GCGAAA	aatcaaCgcgaaa	sbs
pks+	pksPos6	1191736	G>C	0.127	A386A (GCG→GCC)	icd	icd	synonymous	CAACGC	AAAACC	caacgcGaaaacc	sbs
pks+	pksPos6	1191739	A>G	0.133	K387K (AAA→AAG)	icd	icd	synonymous	CGCGAA	ACCGTA	cgcgaaAaccgta	sbs
pks+	pksPos6	1191748	C>T	0.071	T390T (ACC→ACT)	icd	icd	synonymous	CGTAAC	TATGAC	cgtaacCtatgac	sbs
pks+	pksPos6	1194198	A>G	0.067	P16P (CCA→CCG)	lit	lit	synonymous	ATCACC	TTTAAG	atcaccAtttaag	sbs
pks+	pksPos6	1282421	A>G	0.062	intergenic (+439/+101)	narI / rttR			TCGCTG	CGCTCG	tcgctgAcgctcg	sbs
pks+	pksPos6	1527816	T>G	0.12	K98T (AAA→ACA)	yddH	yddH	nonsynonymous	TTAAAT	TATCTT	ttaaatTtatctt	sbs
pks+	pksPos6	1985925	C>A	0.091	W125L (TGG→TTG)	pgsA	pgsA	nonsynonymous	CCAATC	AGGAGA	ccaatcCaggaga	sbs
pks+	pksPos6	1999033	A>T	0.261	N84Y (AAC→TAC)	fliS	fliS	nonsynonymous	ACCCAA	ACTTGA	acccaaAacttga	sbs
pks+	pksPos6	2030785	T>A	0.243	E283D (GAA→GAT)	yedV	yedV	nonsynonymous	AATATT	TCCAGC	aatattTtccagc	sbs
pks+	pksPos6	2305022	A>C	0.073	intergenic (‑9/+103)	apbE / ompC			GTGATT	TCCTCA	gtgattAtcctca	sbs
pks+	pksPos6	2444060	A>T	0.193	S4T (TCA→ACA)	yfcP	yfcP	nonsynonymous	TCATTG	TTTATT	tcattgAtttatt	sbs
pks+	pksPos6	3048247	A>C	0.188	V186G (GTA→GGA)	ygfB	ygfB	nonsynonymous	TTTTGT	CTTCTG	ttttgtActtctg	sbs
pks+	pksPos6	3263502	C>T	0.094	intergenic (+541/+73)	yhaC / rnpB			GTATAG	GTCGTG	gtatagCgtcgtg	sbs
pks+	pksPos6	3745327	Δ12 bp	0.083	intergenic (‑99/‑14)	yiaT / yiaU						small_deletion
pks+	pksPos6	3809774	C>A	0.064	pseudogene (136/669 nt)	rph	rph		GCACGC	TTCTTC	gcacgcCttcttc	sbs
pks+	pksPos6	4465616	T>C	0.158	I121I (ATT→ATC)	yjgL	yjgL	synonymous	AGAAAT	TCACTT	agaaatTtcactt	sbs
pks+	pksPos6	4589723	T>A	0.249	N95I (AAC→ATC)	yjjA	yjjA	nonsynonymous	TTGATG	TTTCGG	ttgatgTtttcgg	sbs
pks+	pksPos7	11780	A>T	0.23	S3T (TCC→ACC)	yaaI	yaaI	nonsynonymous	AAACGG	TTTCAT	aaacggAtttcat	sbs
pks+	pksPos7	426113	A>C	0.319	K18T (AAA→ACA)	yajD	yajD	nonsynonymous	GCGAAA	AGCATT	gcgaaaAagcatt	sbs
pks+	pksPos7	453222	A>T	0.245	N114I (AAC→ATC)	clpX	clpX	nonsynonymous	AAAGTA	CATTCT	aaagtaAcattct	sbs
pks+	pksPos7	837527	A>T	0.062	intergenic (‑15/‑261)	mcbA / rlmF			CCTCAT	AATACA	cctcatAaataca	sbs
pks+	pksPos7	1091382	IS1 (–) +9 bp	0.214	coding (84‑92/987 nt)	ycdU	ycdU					small_insertion
pks+	pksPos7	1191676	C>T	0.549	H366H (CAC→CAT)	icd	icd	synonymous	GCGCCA	ATGGGT	gcgccaCatgggt	sbs
pks+	pksPos7	1191688	C>T	0.471	T370T (ACC→ACT)	icd	icd	synonymous	TTGGAC	GAAGCG	ttggacCgaagcg	sbs
pks+	pksPos7	1191701	T>C	0.45	L375L (TTA→CTA) ‡	icd	icd	synonymous	GCTGAC	TAATTG	gctgacTtaattg	sbs
pks+	pksPos7	1191703	A>G	0.45	L375L (TTA→TTG) ‡	icd	icd	synonymous	TGACTT	ATTGTT	tgacttAattgtt	sbs
pks+	pksPos7	1191733	C>T	0.233	N385N (AAC→AAT)	icd	icd	synonymous	AATCAA	GCGAAA	aatcaaCgcgaaa	sbs
pks+	pksPos7	1191736	G>C	0.233	A386A (GCG→GCC)	icd	icd	synonymous	CAACGC	AAAACC	caacgcGaaaacc	sbs
pks+	pksPos7	1191739	A>G	0.233	K387K (AAA→AAG)	icd	icd	synonymous	CGCGAA	ACCGTA	cgcgaaAaccgta	sbs
pks+	pksPos7	1191748	C>T	0.115	T390T (ACC→ACT)	icd	icd	synonymous	CGTAAC	TATGAC	cgtaacCtatgac	sbs
pks+	pksPos7	1282801	T>A	0.292	intergenic (‑17/+193)	tyrV / tyrT			CAAATT	TGAGGT	caaattTtgaggt	sbs
pks+	pksPos7	1460861	G>A	0.059	pseudogene (1213/2513 nt)	ydbA	ydbA		GAGAGC	CCATCA	gagagcGccatca	sbs
pks+	pksPos7	1460896	C>T	0.08	pseudogene (1248/2513 nt)	ydbA	ydbA		GATTAA	GGTGAT	gattaaCggtgat	sbs
pks+	pksPos7	1461709	A>T	0.202	pseudogene (2061/2513 nt)	ydbA	ydbA		GGCGGA	TATTTC	ggcggaAtatttc	sbs
pks+	pksPos7	1501745	A>T	0.175	V236V (GTA→GTT)	ydcP	ydcP	synonymous	TGGTGT	CGCTCC	tggtgtAcgctcc	sbs
pks+	pksPos7	1643482	A>C	0.241	intergenic (+184/‑157)	ydfC / dicF			GTCGTT	AATTTT	gtcgttAaatttt	sbs
pks+	pksPos7	1702954	C>A	0.057	A593A (GCC→GCA)	rsxC	rsxC	synonymous	CGAAGC	GCTATT	cgaagcCgctatt	sbs
pks+	pksPos7	1725177	G>T	0.253	G612C (GGT→TGT)	lhr	lhr	nonsynonymous	GCTCCG	GTCGTT	gctccgGgtcgtt	sbs
pks+	pksPos7	1729236	A>T	0.323	K182I (AAA→ATA)	mepH	mepH	nonsynonymous	TGGTGA	AATTCG	tggtgaAaattcg	sbs
pks+	pksPos7	1739981	T>A	0.155	K135I (AAA→ATA)	ydhQ	ydhQ	nonsynonymous	ATGATT	TTTCCG	atgattTtttccg	sbs
pks+	pksPos7	2473330	G>A	0.199	G217D (GGT→GAT)	dsdA	dsdA	nonsynonymous	ATTATG	TGTTGC	attatgGtgttgc	sbs
pks+	pksPos7	2795545	A>C	0.087	K280T (AAA→ACA)	nrdE	nrdE	nonsynonymous	ACGAAA	AATCCG	acgaaaAaatccg	sbs
pks+	pksPos7	3048267	C>T	0.065	P179P (CCG→CCA)	ygfB	ygfB	synonymous	CGGTTG	GGATGA	cggttgCggatga	sbs
pks+	pksPos7	4315905	T>G	0.057	intergenic (‑347/+311)	yjdN / yjdM			TACGGA	GGTGCG	tacggaTggtgcg	sbs
pks+	pksPos7	4367980	T>C	0.234	E261G (GAG→GGG)	ampC	ampC	nonsynonymous	GTTTTC	CATTGA	gttttcTcattga	sbs
pks+	pksPos8	208931	A>C	0.154	E38D (GAA→GAC)	tilS	tilS	nonsynonymous	GACGGA	AATCCG	gacggaAaatccg	sbs
pks+	pksPos8	732071	T>C	0.073	pseudogene (171/240 nt)	ybfQ	ybfQ		CGATTT	TTGAAG	cgatttTttgaag	sbs
pks+	pksPos8	1063730	A>T	0.076	intergenic (+20/+237)	ymdF / rutG			TGACGA	TGCATT	tgacgaAtgcatt	sbs
pks+	pksPos8	1191676	C>T	0.851	H366H (CAC→CAT)	icd	icd	synonymous	GCGCCA	ATGGGT	gcgccaCatgggt	sbs
pks+	pksPos8	1191688	C>T	0.818	T370T (ACC→ACT)	icd	icd	synonymous	TTGGAC	GAAGCG	ttggacCgaagcg	sbs
pks+	pksPos8	1191701	T>C	0.828	L375L (TTA→CTA) ‡	icd	icd	synonymous	GCTGAC	TAATTG	gctgacTtaattg	sbs
pks+	pksPos8	1191703	A>G	0.83	L375L (TTA→TTG) ‡	icd	icd	synonymous	TGACTT	ATTGTT	tgacttAattgtt	sbs
pks+	pksPos8	1191733	C>T	0.636	N385N (AAC→AAT)	icd	icd	synonymous	AATCAA	GCGAAA	aatcaaCgcgaaa	sbs
pks+	pksPos8	1191736	G>C	0.636	A386A (GCG→GCC)	icd	icd	synonymous	CAACGC	AAAACC	caacgcGaaaacc	sbs
pks+	pksPos8	1191739	A>G	0.724	K387K (AAA→AAG)	icd	icd	synonymous	CGCGAA	ACCGTA	cgcgaaAaccgta	sbs
pks+	pksPos8	1191748	C>T	0.62	T390T (ACC→ACT)	icd	icd	synonymous	CGTAAC	TATGAC	cgtaacCtatgac	sbs
pks+	pksPos8	1191760	G>A	0.471	E394E (GAG→GAA)	icd	icd	synonymous	CTTCGA	CGTCTG	cttcgaGcgtctg	sbs
pks+	pksPos8	1193467	G>A	0.309	A76V (GCA→GTA)	ymfE	ymfE	nonsynonymous	AAATAT	CAAAAA	aaatatGcaaaaa	sbs
pks+	pksPos8	1278613	C>A	0.338	I1098I (ATC→ATA)	narG	narG	synonymous	GGGTAT	CACTCC	gggtatCcactcc	sbs
pks+	pksPos8	1296297	C>A	0.103	P287T (CCG→ACG)	oppA	oppA	nonsynonymous	GAGATC	CGGACG	gagatcCcggacg	sbs
pks+	pksPos8	1703062	T>C	0.055	R629R (CGT→CGC)	rsxC	rsxC	synonymous	TGCCCG	GCCAAA	tgcccgTgccaaa	sbs
pks+	pksPos8	1708003	G>T	0.087	P326P (CCG→CCT)	dtpA	dtpA	synonymous	GAACCC	TTCTGG	gaacccGttctgg	sbs
pks+	pksPos8	1818263	A>G	0.168	K164K (AAA→AAG)	cho	cho	synonymous	ACAAAA	CTTTGT	acaaaaActttgt	sbs
pks+	pksPos8	1822044	T>A	0.084	K158I (AAA→ATA)	astB	astB	nonsynonymous	CTAAAT	TCTCTT	ctaaatTtctctt	sbs
pks+	pksPos8	2034779	IS5 (+) +4 bp	0.09	intergenic (+180/‑74)	yedZ / zinT						small_insertion
pks+	pksPos8	2355664	G>A	0.227	A9A (GCC→GCT)	rhmR	rhmR	synonymous	TGTCAG	GCGGGA	tgtcagGgcggga	sbs
pks+	pksPos8	2359321	A>T	0.233	intergenic (‑222/‑86)	ais / arnB			TCCTTA	AATTTC	tccttaAaatttc	sbs
pks+	pksPos8	2470804	G>A	0.067	S102L (TCG→TTG)	dsdC	dsdC	nonsynonymous	GTTCCC	ATAACT	gttcccGataact	sbs
pks+	pksPos8	2935433	A>T	0.251	L165* (TTA→TAA)	gcvA	gcvA	nonsynonymous	GGCAAT	AATATT	ggcaatAaatatt	sbs
pks+	pksPos8	3377945	T>A	0.199	intergenic (‑318/‑117)	mdh / argR			CGAAAT	TGATAA	cgaaatTtgataa	sbs
pks+	pksPos8	4593188	IS5 (–) +4 bp	0.128	intergenic (‑513/‑103)	yjjP / yjjQ						small_insertion
pks+	pksPos9	222268	G>A	0.278	noncoding (23/2904 nt)	rrlH	rrlH		GTACAC	GTGGAT	gtacacGgtggat	sbs
pks+	pksPos9	345777	T>A	0.243	S19T (TCT→ACT)	prpC	prpC	nonsynonymous	AAAAAA	CTGTGG	aaaaaaTctgtgg	sbs
pks+	pksPos9	370442	T>C	0.067	intergenic (+105/‑473)	mhpE / mhpT			TGTAGG	CTGATA	tgtaggTctgata	sbs
pks+	pksPos9	656879	T>A	0.19	intergenic (‑45/+214)	ybeF / lipB			AAAAAA	TACAAT	aaaaaaTtacaat	sbs
pks+	pksPos9	666608	C>A	0.25	A152S (GCT→TCT)	holA	holA	nonsynonymous	GCGCAG	AACCCA	gcgcagCaaccca	sbs
pks+	pksPos9	726166	A>C	0.249	L376F (TTA→TTC)	rhsC	rhsC	nonsynonymous	AGGCTT	AGTTAC	aggcttAagttac	sbs
pks+	pksPos9	840051	C>T	0.357	A296T (GCG→ACG)	ybiO	ybiO	nonsynonymous	CCAGCG	ACCTAT	ccagcgCacctat	sbs
pks+	pksPos9	1191676	C>T	0.383	H366H (CAC→CAT)	icd	icd	synonymous	GCGCCA	ATGGGT	gcgccaCatgggt	sbs
pks+	pksPos9	1191688	C>T	0.374	T370T (ACC→ACT)	icd	icd	synonymous	TTGGAC	GAAGCG	ttggacCgaagcg	sbs
pks+	pksPos9	1191701	T>C	0.353	L375L (TTA→CTA) ‡	icd	icd	synonymous	GCTGAC	TAATTG	gctgacTtaattg	sbs
pks+	pksPos9	1191703	A>G	0.353	L375L (TTA→TTG) ‡	icd	icd	synonymous	TGACTT	ATTGTT	tgacttAattgtt	sbs
pks+	pksPos9	1191733	C>T	0.193	N385N (AAC→AAT)	icd	icd	synonymous	AATCAA	GCGAAA	aatcaaCgcgaaa	sbs
pks+	pksPos9	1191736	G>C	0.193	A386A (GCG→GCC)	icd	icd	synonymous	CAACGC	AAAACC	caacgcGaaaacc	sbs
pks+	pksPos9	1191739	A>G	0.194	K387K (AAA→AAG)	icd	icd	synonymous	CGCGAA	ACCGTA	cgcgaaAaccgta	sbs
pks+	pksPos9	1191748	C>T	0.124	T390T (ACC→ACT)	icd	icd	synonymous	CGTAAC	TATGAC	cgtaacCtatgac	sbs
pks+	pksPos9	1191760	G>A	0.06	E394E (GAG→GAA)	icd	icd	synonymous	CTTCGA	CGTCTG	cttcgaGcgtctg	sbs
pks+	pksPos9	1295231	A>T	0.254	intergenic (+530/‑208)	ychE / oppA			TCGCGA	AGAATA	tcgcgaAagaata	sbs
pks+	pksPos9	1460593	C>G	0.05	pseudogene (945/2513 nt)	ydbA	ydbA		CGGCAC	CAGATT	cggcacCcagatt	sbs
pks+	pksPos9	1703008	A>G	0.051	E611E (GAA→GAG)	rsxC	rsxC	synonymous	TGCGGA	CCAGAA	tgcggaAccagaa	sbs
pks+	pksPos9	1703104	G>A	0.07	E643E (GAG→GAA)	rsxC	rsxC	synonymous	TGCCGA	CCAGAA	tgccgaGccagaa	sbs
pks+	pksPos9	1964931	A>T	0.223	F104Y (TTT→TAT)	tap	tap	nonsynonymous	GCCATA	AACTTT	gccataAaacttt	sbs
pks+	pksPos9	2117349	T>A	0.217	K218I (AAA→ATA)	cpsB	cpsB	nonsynonymous	TATTTT	TCAGTT	tattttTtcagtt	sbs
pks+	pksPos9	2337437	IS2 (–) +5 bp	0.285	coding (208‑212/3753 nt)	yfaL	yfaL					small_insertion
pks+	pksPos9	2595532	A>T	0.213	N119I (AAT→ATT)	hyfB	hyfB	nonsynonymous	TTATGA	TATTTT	ttatgaAtatttt	sbs
pks+	pksPos9	2666963	T>A	0.215	F87I (TTC→ATC)	yphA	yphA	nonsynonymous	TTTATT	TCTACA	tttattTtctaca	sbs
pks+	pksPos9	3753562	T>A	0.276	K350* (AAA→TAA)	selA	selA	nonsynonymous	GTAATT	TTCACT	gtaattTttcact	sbs
pks+	pksPos10	208931	A>C	0.084	E38D (GAA→GAC)	tilS	tilS	nonsynonymous	GACGGA	AATCCG	gacggaAaatccg	sbs
pks+	pksPos10	439649	T>C	0.118	N108S (AAC→AGC)	panE	panE	nonsynonymous	TGAATG	TTTGCA	tgaatgTtttgca	sbs
pks+	pksPos10	447838	G>A	0.116	S388S (TCC→TCT)	ampG	ampG	synonymous	GGCGAC	GAGAAT	ggcgacGgagaat	sbs
pks+	pksPos10	1142145	A>T	0.156	noncoding (101/169 nt)	psrD	psrD		GAACGA	AATAAA	gaacgaAaataaa	sbs
pks+	pksPos10	1191676	C>T	1	H366H (CAC→CAT)	icd	icd	synonymous	GCGCCA	ATGGGT	gcgccaCatgggt	sbs
pks+	pksPos10	1191688	C>T	1	T370T (ACC→ACT)	icd	icd	synonymous	TTGGAC	GAAGCG	ttggacCgaagcg	sbs
pks+	pksPos10	1191701	T>C	1	L375M (TTA→CTG)	icd	icd	nonsynonymous	GCTGAC	TAATTG	gctgacTtaattg	sbs
pks+	pksPos10	1191703	A>G	1	L375M (TTA→CTG)	icd	icd	nonsynonymous	TGACTT	ATTGTT	tgacttAattgtt	sbs
pks+	pksPos10	1296297	C>A	0.152	P287T (CCG→ACG)	oppA	oppA	nonsynonymous	GAGATC	CGGACG	gagatcCcggacg	sbs
pks+	pksPos10	1542196	T>C	0.151	F180S (TTT→TCT)	fdnG	fdnG	nonsynonymous	AGAAAT	TGCCCG	agaaatTtgcccg	sbs
pks+	pksPos10	1609330	A>C	0.145	L90F (TTA→TTC)	yneJ	yneJ	nonsynonymous	AGGTTT	TTTTCT	aggtttAttttct	sbs
pks+	pksPos10	1644507	T>A	0.126	pseudogene (173/765 nt)	ydfE	ydfE		ATAAAT	TATTGT	ataaatTtattgt	sbs
pks+	pksPos10	1708003	G>T	0.086	P326P (CCG→CCT)	dtpA	dtpA	synonymous	GAACCC	TTCTGG	gaacccGttctgg	sbs
pks+	pksPos10	1818263	A>G	0.094	K164K (AAA→AAG)	cho	cho	synonymous	ACAAAA	CTTTGT	acaaaaActttgt	sbs
pks+	pksPos10	1822044	T>A	0.059	K158I (AAA→ATA)	astB	astB	nonsynonymous	CTAAAT	TCTCTT	ctaaatTtctctt	sbs
pks+	pksPos10	2034779	IS5 (+) +4 bp	0.094	intergenic (+180/‑74)	yedZ / zinT						small_insertion
pks+	pksPos10	2937398	A>G	0.27	K235E (AAA→GAA)	csdA	csdA	nonsynonymous	TATGGT	AATCAG	tatggtAaatcag	sbs
pks+	pksPos10	3048237	C>T	0.06	P189P (CCG→CCA)	ygfB	ygfB	synonymous	TAGAGT	GGTTTT	tagagtCggtttt	sbs
pks+	pksPos10	3420206	G>A	0.116	intergenic (‑64/+111)	rrlD / alaU			ACTTTC	TTGTTC	actttcGttgttc	sbs
pks+	pksPos10	4081476	G>T	0.082	H580Q (CAC→CAA)	frvR	frvR	nonsynonymous	CCCCTT	TGAAGT	ccccttGtgaagt	sbs
pks+	pksPos10	4285857	T>C	0.065	intergenic (+135/+396)	gltP / yjcO			CGTTTA	GCCGCA	cgtttaTgccgca	sbs
pks+	pksPos10	4285893	A>C	0.063	intergenic (+171/+360)	gltP / yjcO			CGCTTA	CGCGTC	cgcttaAcgcgtc	sbs
pks+	pksPos1	161068	A>C	0.147	intergenic (+47/‑149)	hrpB / mrcB			GAGGGC	TCAGCG	gagggcAtcagcg	sbs
pks+	pksPos1	252956	C>G	0.076	intergenic (+34/‑58)	gpt / frsA			GTTGTT	TTTTTA	gttgttCttttta	sbs
pks+	pksPos1	576215	G>C	0.131	intergenic (‑314/‑75)	ylcI / nohD			AGAAAG	AAACGA	agaaagGaaacga	sbs
pks+	pksPos1	776779	Δ124 bp	0.217	nan	lysZ	lysZ					medium_deletion
pks+	pksPos1	896129	A>C	0.255	intergenic (‑98/+193)	artJ / artM			ATGATT	AATAAT	atgattAaataat	sbs
pks+	pksPos1	1060644	C>T	0.245	H385Y (CAT→TAT)	yccE	yccE	nonsynonymous	GGCAAT	ATTATG	ggcaatCattatg	sbs
pks+	pksPos1	1191676	C>T	0.643	H366H (CAC→CAT)	icd	icd	synonymous	GCGCCA	ATGGGT	gcgccaCatgggt	sbs
pks+	pksPos1	1191688	C>T	0.588	T370T (ACC→ACT)	icd	icd	synonymous	TTGGAC	GAAGCG	ttggacCgaagcg	sbs
pks+	pksPos1	1191701	T>C	0.542	L375L (TTA→CTA) ‡	icd	icd	synonymous	GCTGAC	TAATTG	gctgacTtaattg	sbs
pks+	pksPos1	1191703	A>G	0.542	L375L (TTA→TTG) ‡	icd	icd	synonymous	TGACTT	ATTGTT	tgacttAattgtt	sbs
pks+	pksPos1	1191733	C>T	0.389	N385N (AAC→AAT)	icd	icd	synonymous	AATCAA	GCGAAA	aatcaaCgcgaaa	sbs
pks+	pksPos1	1191736	G>C	0.388	A386A (GCG→GCC)	icd	icd	synonymous	CAACGC	AAAACC	caacgcGaaaacc	sbs
pks+	pksPos1	1191739	A>G	0.4	K387K (AAA→AAG)	icd	icd	synonymous	CGCGAA	ACCGTA	cgcgaaAaccgta	sbs
pks+	pksPos1	1191748	C>T	0.271	T390T (ACC→ACT)	icd	icd	synonymous	CGTAAC	TATGAC	cgtaacCtatgac	sbs
pks+	pksPos1	1191760	G>A	0.153	E394E (GAG→GAA)	icd	icd	synonymous	CTTCGA	CGTCTG	cttcgaGcgtctg	sbs
pks+	pksPos1	1632928	T>C	0.233	intergenic (‑4/+359)	cspI / rzpQ			CATAAT	ATTACC	cataatTattacc	sbs
pks+	pksPos1	1887111	T>G	0.245	S128R (AGC→CGC)	yoaA	yoaA	nonsynonymous	CATCGC	TAAGAT	catcgcTtaagat	sbs
pks+	pksPos1	2170713	C>A	0.134	intergenic (‑30/+278)	gatY / fbaB			CGATTT	AAAATA	cgatttCaaaata	sbs
pks+	pksPos1	2170724	G>T	0.156	intergenic (‑41/+267)	gatY / fbaB			TATAAT	AAATTA	tataatGaaatta	sbs
pks+	pksPos1	2170754	C>A	0.069	intergenic (‑71/+237)	gatY / fbaB			AGATAA	GATCAC	agataaCgatcac	sbs
pks+	pksPos1	2170758	C>A	0.074	intergenic (‑75/+233)	gatY / fbaB			AACGAT	ACAAAA	aacgatCacaaaa	sbs
pks+	pksPos1	2420334	A>T	0.275	intergenic (‑67/+154)	hisJ / argT			GCCATA	AATTGA	gccataAaattga	sbs
pks+	pksPos1	2463906	C>A	0.116	Q433K (CAA→AAA)	gtrS	gtrS	nonsynonymous	ATAATT	AAAGAA	ataattCaaagaa	sbs
pks+	pksPos1	2463910	G>T	0.093	R434I (AGA→ATA)	gtrS	gtrS	nonsynonymous	TTCAAA	AAATCA	ttcaaaGaaatca	sbs
pks+	pksPos1	2463915	C>A	0.113	Q436K (CAA→AAA)	gtrS	gtrS	nonsynonymous	AGAAAT	AAGACA	agaaatCaagaca	sbs
pks+	pksPos1	2538290	C>T	0.295	A227T (GCG→ACG)	murR	murR	nonsynonymous	AATGCG	CAGCCG	aatgcgCcagccg	sbs
pks+	pksPos1	2609761	A>T	0.212	E103D (GAA→GAT)	bepA	bepA	nonsynonymous	CGACGA	ATTAAC	cgacgaAattaac	sbs
pks+	pksPos1	2629922	T>G	0.277	K265T (AAA→ACA)	der	der	nonsynonymous	GTGATT	TGCCGC	gtgattTtgccgc	sbs
pks+	pksPos1	3011573	G>T	0.209	A719S (GCA→TCA)	ygfK	ygfK	nonsynonymous	ATGCCC	CATGGC	atgcccGcatggc	sbs
pks+	pksPos1	3044057	A>T	0.251	intergenic (‑31/+417)	gcvT / ubiI			CTGACA	CTTTTT	ctgacaActtttt	sbs
pks+	pksPos1	3059717	Δ1 bp	0.29	coding (816/897 nt)	ygfI	ygfI					small_deletion
pks+	pksPos1	3822340	A>C	0.098	Q12H (CAA→CAC)	xanP	xanP	nonsynonymous	TGCGCA	CCGGTT	tgcgcaAccggtt	sbs
pks+	pksPos1	4234541	G>T	0.152	Q155K (CAA→AAA)	malF	malF	nonsynonymous	GTTTTT	CTCGCC	gtttttGctcgcc	sbs
pks+	pksPos1	4532409	A>C	0.226	N186H (AAT→CAT)	fimE	fimE	nonsynonymous	GAAAGA	ATAATC	gaaagaAataatc	sbs
pks+	pksPos2	357016	T>G	0.059	N186H (AAC→CAC)	lacA	lacA	nonsynonymous	GGTCGT	TATTTC	ggtcgtTtatttc	sbs
pks+	pksPos2	357039	G>C	0.057	P178R (CCT→CGT)	lacA	lacA	nonsynonymous	CGACAA	GAACGC	cgacaaGgaacgc	sbs
pks+	pksPos2	576183	G>T	0.063	intergenic (‑282/‑107)	ylcI / nohD			CTTAAT	TATTTA	cttaatGtattta	sbs
pks+	pksPos2	838661	T>G	0.113	W292G (TGG→GGG)	rlmF	rlmF	nonsynonymous	ATTGCC	GGACCT	attgccTggacct	sbs
pks+	pksPos2	1045283	T>G	0.15	intergenic (‑83/‑6)	gfcA / insA			TGAGGT	CTCCAG	tgaggtTctccag	sbs
pks+	pksPos2	1160024	G>C	0.141	M158I (ATG→ATC)	nagZ	nagZ	nonsynonymous	CGGAAT	AAAACG	cggaatGaaaacg	sbs
pks+	pksPos2	1191676	C>T	0.294	H366H (CAC→CAT)	icd	icd	synonymous	GCGCCA	ATGGGT	gcgccaCatgggt	sbs
pks+	pksPos2	1191688	C>T	0.256	T370T (ACC→ACT)	icd	icd	synonymous	TTGGAC	GAAGCG	ttggacCgaagcg	sbs
pks+	pksPos2	1191701	T>C	0.217	L375L (TTA→CTA) ‡	icd	icd	synonymous	GCTGAC	TAATTG	gctgacTtaattg	sbs
pks+	pksPos2	1191703	A>G	0.224	L375L (TTA→TTG) ‡	icd	icd	synonymous	TGACTT	ATTGTT	tgacttAattgtt	sbs
pks+	pksPos2	1191733	C>T	0.107	N385N (AAC→AAT)	icd	icd	synonymous	AATCAA	GCGAAA	aatcaaCgcgaaa	sbs
pks+	pksPos2	1191736	G>C	0.107	A386A (GCG→GCC)	icd	icd	synonymous	CAACGC	AAAACC	caacgcGaaaacc	sbs
pks+	pksPos2	1191739	A>G	0.112	K387K (AAA→AAG)	icd	icd	synonymous	CGCGAA	ACCGTA	cgcgaaAaccgta	sbs
pks+	pksPos2	1191748	C>T	0.059	T390T (ACC→ACT)	icd	icd	synonymous	CGTAAC	TATGAC	cgtaacCtatgac	sbs
pks+	pksPos2	1339767	G>C	0.249	T411T (ACC→ACG)	gmr	gmr	synonymous	CAAGTT	GTATCC	caagttGgtatcc	sbs
pks+	pksPos2	1362888	C>A	0.227	H185N (CAC→AAC)	pspA	pspA	nonsynonymous	GAAAGC	ACAGCT	gaaagcCacagct	sbs
pks+	pksPos2	1516468	A>C	0.073	Y285* (TAT→TAG)	yncD	yncD	nonsynonymous	ACGCTC	TAGCGC	acgctcAtagcgc	sbs
pks+	pksPos2	1630709	C>G	0.145	intergenic (‑85/‑304)	nohQ / ynfO			TCTTTT	AGGGGG	tcttttCaggggg	sbs
pks+	pksPos2	1767306	A>T	0.216	I180F (ATC→TTC)	ydiN	ydiN	nonsynonymous	GTACTG	TCACGC	gtactgAtcacgc	sbs
pks+	pksPos2	1947356	T>G	0.3	F133C (TTT→TGT)	cmoA	cmoA	nonsynonymous	TGAATT	TACCCT	tgaattTtaccct	sbs
pks+	pksPos2	2170707	C>A	0.136	intergenic (‑24/+284)	gatY / fbaB			TGTTTT	GATTTC	tgttttCgatttc	sbs
pks+	pksPos2	2170713	C>A	0.206	intergenic (‑30/+278)	gatY / fbaB			CGATTT	AAAATA	cgatttCaaaata	sbs
pks+	pksPos2	2170724	G>T	0.254	intergenic (‑41/+267)	gatY / fbaB			TATAAT	AAATTA	tataatGaaatta	sbs
pks+	pksPos2	2170758	C>A	0.082	intergenic (‑75/+233)	gatY / fbaB			AACGAT	ACAAAA	aacgatCacaaaa	sbs
pks+	pksPos2	2170775	G>T	0.11	intergenic (‑92/+216)	gatY / fbaB			CAATAT	AAAATT	caatatGaaaatt	sbs
pks+	pksPos2	2170785	C>A	0.09	intergenic (‑102/+206)	gatY / fbaB			ATTATT	GAGGAG	attattCgaggag	sbs
pks+	pksPos2	2463910	G>T	0.106	R434I (AGA→ATA)	gtrS	gtrS	nonsynonymous	TTCAAA	AAATCA	ttcaaaGaaatca	sbs
pks+	pksPos2	2463915	C>A	0.103	Q436K (CAA→AAA)	gtrS	gtrS	nonsynonymous	AGAAAT	AAGACA	agaaatCaagaca	sbs
pks+	pksPos2	2569457	T>A	0.224	*760Y (TAA→TAT)	maeB	maeB	nonsynonymous	AAAAAA	TACAGC	aaaaaaTtacagc	sbs
pks+	pksPos2	2719191	G>T	0.142	intergenic (‑86/+237)	kgtP / rrfG			TTTGTT	CATATC	tttgttGcatatc	sbs
pks+	pksPos2	2719536	G>T	0.372	noncoding (12/120 nt)	rrfG	rrfG		CGCTAC	GCCGCC	cgctacGgccgcc	sbs
pks+	pksPos2	2998364	G>T	0.059	A261E (GCA→GAA)	ygeV	ygeV	nonsynonymous	GCATTT	CTACAG	gcatttGctacag	sbs
pks+	pksPos2	3039409	T>G	0.067	intergenic (‑149/+118)	ygfF / gcvP			GGCCTG	TCCCCT	ggcctgTtcccct	sbs
pks+	pksPos2	3080755	T>G	0.092	F231V (TTC→GTC)	metK	metK	nonsynonymous	GGTCGT	TCGTTA	ggtcgtTtcgtta	sbs
pks+	pksPos2	3657233	T>C	0.243	intergenic (+346/+17)	mdtF / gadW			CCAATA	TCAAAT	ccaataTtcaaat	sbs
pks+	pksPos2	3822340	A>C	0.119	Q12H (CAA→CAC)	xanP	xanP	nonsynonymous	TGCGCA	CCGGTT	tgcgcaAccggtt	sbs
pks+	pksPos2	3827184	T>G	0.221	E238D (GAA→GAC)	yicI	yicI	nonsynonymous	AAAGTA	TCGAGA	aaagtaTtcgaga	sbs
pks+	pksPos2	4058518	C>A	0.063	M203I (ATG→ATT)	yihO	yihO	nonsynonymous	GCACAG	ATCATA	gcacagCatcata	sbs
pks+	pksPos2	4207788	A>T	0.249	E251V (GAA→GTA)	aceA	aceA	nonsynonymous	ACAGCG	ATTTAT	acagcgAatttat	sbs
pks+	pksPos2	4234581	G>T	0.075	G141G (GGC→GGA)	malF	malF	synonymous	ATTTTT	CCGGTT	atttttGccggtt	sbs
pks+	pksPos2	4236482	G>T	0.086	intergenic (‑135/‑230)	malE / malK			AGAATT	GCGGTA	agaattGgcggta	sbs
pks+	pksPos2	4280750	T>A	0.167	F116Y (TTT→TAT)	nrfD	nrfD	nonsynonymous	AAATCT	TGAACA	aaatctTtgaaca	sbs
pks+	pksPos2	4375484	G>T	0.056	R92L (CGT→CTT)	yjeN	yjeN	nonsynonymous	TGTTTC	TATGCG	tgtttcGtatgcg	sbs
pks+	pksPos2	4375491	C>A	0.083	R94R (CGC→CGA)	yjeN	yjeN	synonymous	TATGCG	TATAGC	tatgcgCtatagc	sbs
pks+	pksPos2	4495531	C>T	0.177	S143L (TCA→TTA)	yjhC	yjhC	nonsynonymous	TATTAT	ATGTCA	tattatCatgtca	sbs
pks+	pksPos2	4550545	A>T	0.24	intergenic (‑48/‑202)	yjiH / kptA			CCAGGA	AATTCC	ccaggaAaattcc	sbs
pks+	pksPos2	4586623	G>T	0.058	E273* (GAA→TAA)	yjjN	yjjN	nonsynonymous	GATCCG	AATTCC	gatccgGaattcc	sbs
pks+	pksPos2	4586640	A>C	0.096	E278D (GAA→GAC)	yjjN	yjjN	nonsynonymous	AAAAGA	ACGACG	aaaagaAacgacg	sbs
pks-	pksNeg1	161068	A>C	0.28	intergenic (+47/‑149)	hrpB / mrcB			GAGGGC	TCAGCG	gagggcAtcagcg	sbs
pks-	pksNeg1	418995	T>G	0.059	L341R (CTG→CGG)	malZ	malZ	nonsynonymous	ATATGC	GGGGGA	atatgcTggggga	sbs
pks-	pksNeg1	910682	T>G	0.09	intergenic (‑369/+126)	ybjE / aqpZ			GCCCCC	GCGCGC	gcccccTgcgcgc	sbs
pks-	pksNeg1	1282493	C>G	0.064	intergenic (+511/+29)	narI / rttR			GATTCG	TTGAGA	gattcgCttgaga	sbs
pks-	pksNeg1	1913770	G>A	0.24	L668L (CTG→CTA)	yebT	yebT	synonymous	GGATCT	ATTACC	ggatctGattacc	sbs
pks-	pksNeg1	2170713	C>A	0.162	intergenic (‑30/+278)	gatY / fbaB			CGATTT	AAAATA	cgatttCaaaata	sbs
pks-	pksNeg1	2170724	G>T	0.161	intergenic (‑41/+267)	gatY / fbaB			TATAAT	AAATTA	tataatGaaatta	sbs
pks-	pksNeg1	2200977	T>G	0.069	L602V (TTA→GTA)	yehM	yehM	nonsynonymous	GTAGCC	TACTGG	gtagccTtactgg	sbs
pks-	pksNeg1	2404720	C>A	0.094	A38S (GCA→TCA)	yfbS	yfbS	nonsynonymous	TTAATG	AAACGC	ttaatgCaaacgc	sbs
pks-	pksNeg1	2463910	G>T	0.129	R434I (AGA→ATA)	gtrS	gtrS	nonsynonymous	TTCAAA	AAATCA	ttcaaaGaaatca	sbs
pks-	pksNeg1	2998364	G>T	0.065	A261E (GCA→GAA)	ygeV	ygeV	nonsynonymous	GCATTT	CTACAG	gcatttGctacag	sbs
pks-	pksNeg1	3048264	T>G	0.081	Q180H (CAA→CAC)	ygfB	ygfB	nonsynonymous	GGTCGG	TGCGGA	ggtcggTtgcgga	sbs
pks-	pksNeg1	3080755	T>G	0.066	F231V (TTC→GTC)	metK	metK	nonsynonymous	GGTCGT	TCGTTA	ggtcgtTtcgtta	sbs
pks-	pksNeg1	3385560	C>G	0.057	intergenic (‑173/+257)	tldD / yhdP			GACCTA	GGTTAT	gacctaCggttat	sbs
pks-	pksNeg1	3822340	A>C	0.082	Q12H (CAA→CAC)	xanP	xanP	nonsynonymous	TGCGCA	CCGGTT	tgcgcaAccggtt	sbs
pks-	pksNeg1	4586609	A>T	0.064	Q268L (CAG→CTG)	yjjN	yjjN	nonsynonymous	AGTTGC	GTTCTC	agttgcAgttctc	sbs
pks-	pksNeg2	295695	T>G	0.05	E317D (GAA→GAC)	paoC	paoC	nonsynonymous	CGCCGT	TCCGGC	cgccgtTtccggc	sbs
pks-	pksNeg2	1282287	T>G	0.103	intergenic (+305/+235)	narI / rttR			CCCCGC	TGGGCA	ccccgcTtgggca	sbs
pks-	pksNeg2	1802451	Δ8 bp	0.269	coding (399‑406/861 nt)	yniA	yniA					small_deletion
pks-	pksNeg2	2170713	C>A	0.149	intergenic (‑30/+278)	gatY / fbaB			CGATTT	AAAATA	cgatttCaaaata	sbs
pks-	pksNeg2	2170724	G>T	0.185	intergenic (‑41/+267)	gatY / fbaB			TATAAT	AAATTA	tataatGaaatta	sbs
pks-	pksNeg2	2170758	C>A	0.077	intergenic (‑75/+233)	gatY / fbaB			AACGAT	ACAAAA	aacgatCacaaaa	sbs
pks-	pksNeg2	2463906	C>A	0.138	Q433K (CAA→AAA)	gtrS	gtrS	nonsynonymous	ATAATT	AAAGAA	ataattCaaagaa	sbs
pks-	pksNeg2	2463910	G>T	0.16	R434I (AGA→ATA)	gtrS	gtrS	nonsynonymous	TTCAAA	AAATCA	ttcaaaGaaatca	sbs
pks-	pksNeg2	2463915	C>A	0.159	Q436K (CAA→AAA)	gtrS	gtrS	nonsynonymous	AGAAAT	AAGACA	agaaatCaagaca	sbs
pks-	pksNeg2	2958464	C>G	0.11	Q17H (CAG→CAC)	thyA	thyA	nonsynonymous	GTTTTT	TGTGTG	gtttttCtgtgtg	sbs
pks-	pksNeg2	3080755	T>G	0.086	F231V (TTC→GTC)	metK	metK	nonsynonymous	GGTCGT	TCGTTA	ggtcgtTtcgtta	sbs
pks-	pksNeg2	3496619	G>T	0.255	V32L (GTG→TTG)	frlD	frlD	nonsynonymous	GTGGCG	TGTACT	gtggcgGtgtact	sbs
pks-	pksNeg3	1702975	G>A	0.06	A600A (GCG→GCA)	rsxC	rsxC	synonymous	CAAAGC	CGCAAG	caaagcGcgcaag	sbs
pks-	pksNeg3	3250645	A>G	0.265	V242A (GTG→GCG)	yhaO	yhaO	nonsynonymous	GAGATC	CCATCG	gagatcAccatcg	sbs
pks-	pksNeg3	3333912	T>C	0.055	P93P (CCT→CCC)	yrbG	yrbG	synonymous	TCGTCC	TTTACC	tcgtccTtttacc	sbs
pks-	pksNeg3	4143586	C>T	0.061	intergenic (‑560/+38)	ppc / argE			CAACAG	GCCGGA	caacagCgccgga	sbs
pks-	pksNeg4	1282322	A>G	0.085	intergenic (+340/+200)	narI / rttR			TTGAGA	TTCCGG	ttgagaAttccgg	sbs
pks-	pksNeg4	1282430	C>T	0.056	intergenic (+448/+92)	narI / rttR			CTCGAG	CGAACC	ctcgagCcgaacc	sbs
pks-	pksNeg4	1460861	G>A	0.052	pseudogene (1213/2513 nt)	ydbA	ydbA		GAGAGC	CCATCA	gagagcGccatca	sbs
pks-	pksNeg4	2298128	C>T	0.083	intergenic (+256/+459)	eco / mqo			GTAGGT	GGATAA	gtaggtCggataa	sbs
pks-	pksNeg4	2723018	T>C	0.066	noncoding (1499/1542 nt)	rrsG	rrsG		CCTTGT	ACGACT	ccttgtTacgact	sbs
pks-	pksNeg4	3373973	C>T	0.067	intergenic (+25/‑129)	yhcB / degQ			CCATTG	GCCCTC	ccattgCgccctc	sbs
pks-	pksNeg4	3631510	C>T	0.079	A170V (GCT→GTT)	pitA	pitA	nonsynonymous	TGTTTG	TGGCGG	tgtttgCtggcgg	sbs
pks-	pksNeg4	4143375	A>G	0.053	intergenic (‑349/+249)	ppc / argE			GCCTAC	GTTGGG	gcctacAgttggg	sbs
pks-	pksNeg5	1282326	C>A	0.057	intergenic (+344/+196)	narI / rttR			GAATTC	GGGGCT	gaattcCggggct	sbs
pks-	pksNeg5	1282617	G>A	0.05	noncoding (76/171 nt) Q6* (CAA→TAA)	rttR tpr	rttR tpr		AACCTT	GTCGAA	aaccttGgtcgaa	sbs
pks-	pksNeg5	3285459	IS5 (–) +4 bp	0.117	coding (760‑763/1092 nt)	yraK	yraK					small_insertion
pks-	pksNeg6	1217391	G>A	0.053	pseudogene (2335/2648 nt)	ycgH	ycgH		AATGAC	CAAATA	aatgacGcaaata	sbs
pks-	pksNeg6	1282287	T>G	0.057	intergenic (+305/+235)	narI / rttR			CCCCGC	TGGGCA	ccccgcTtgggca	sbs
pks-	pksNeg6	1588245	C>T	0.051	pseudogene (4000/5323 nt)	yneO	yneO		GTTGAA	GTCATC	gttgaaCgtcatc	sbs
pks-	pksNeg6	1789448	C>T	0.075	intergenic (‑39/+62)	btuC / ihfA			ATTTTA	GGTGAC	attttaCggtgac	sbs
pks-	pksNeg6	2165296	T>C	0.09	intergenic (‑88/+18)	gatR / gatD			CCAGCA	CACGCT	ccagcaTcacgct	sbs
pks-	pksNeg6	2298492	A>G	0.056	intergenic (+620/+95)	eco / mqo			GCATCC	ACATCT	gcatccAacatct	sbs
pks-	pksNeg6	2470798	G>A	0.082	T104M (ACG→ATG)	dsdC	dsdC	nonsynonymous	GTTAAC	TTCCCG	gttaacGttcccg	sbs
pks-	pksNeg6	3256912	G>A	0.058	D36D (GAC→GAT)	tdcD	tdcD	synonymous	AATACC	TCGGCA	aataccGtcggca	sbs
pks-	pksNeg7	360243	G>T	0.053	intergenic (‑177/+418)	lacZ / lacI			GGCCCA	TCTTTC	ggcccaGtctttc	sbs
pks-	pksNeg7	1273968	C>T	0.237	P186S (CCG→TCG)	narK	narK	nonsynonymous	GTTGCT	CGCTGG	gttgctCcgctgg	sbs
pks-	pksNeg7	1282249	A>G	0.067	intergenic (+267/+273)	narI / rttR			GCGCTC	AGTCGA	gcgctcAagtcga	sbs
pks-	pksNeg7	1282421	A>G	0.064	intergenic (+439/+101)	narI / rttR			TCGCTG	CGCTCG	tcgctgAcgctcg	sbs
pks-	pksNeg7	1282430	C>T	0.074	intergenic (+448/+92)	narI / rttR			CTCGAG	CGAACC	ctcgagCcgaacc	sbs
pks-	pksNeg7	1460752	C>T	0.05	pseudogene (1104/2513 nt)	ydbA	ydbA		CACCGG	GACAGC	caccggCgacagc	sbs
pks-	pksNeg7	2811683	G>A	0.079	intergenic (‑50/+149)	argY / argV			AAAGCC	TATCAA	aaagccGtatcaa	sbs
pks-	pksNeg7	4143375	A>G	0.06	intergenic (‑349/+249)	ppc / argE			GCCTAC	GTTGGG	gcctacAgttggg	sbs
pks-	pksNeg8	1460458	T>C	0.06	pseudogene (810/2513 nt)	ydbA	ydbA		CACCGG	GACAGC	caccggTgacagc	sbs
pks-	pksNeg8	1460467	G>A	0.075	pseudogene (819/2513 nt)	ydbA	ydbA		CAGCGC	ACGGTG	cagcgcGacggtg	sbs
pks-	pksNeg8	1460861	G>A	0.066	pseudogene (1213/2513 nt)	ydbA	ydbA		GAGAGC	CCATCA	gagagcGccatca	sbs
pks-	pksNeg8	1460896	C>T	0.056	pseudogene (1248/2513 nt)	ydbA	ydbA		GATTAA	GGTGAT	gattaaCggtgat	sbs
pks-	pksNeg8	1703101	C>G	0.058	A642A (GCC→GCG)	rsxC	rsxC	synonymous	TAATGC	GAGCCA	taatgcCgagcca	sbs
pks-	pksNeg8	4169668	C>T	0.051	intergenic (+157/‑256)	rplA / rplJ			AGGAAG	CAACGC	aggaagCcaacgc	sbs
pks-	pksNeg9	1282421	A>G	0.068	intergenic (+439/+101)	narI / rttR			TCGCTG	CGCTCG	tcgctgAcgctcg	sbs
pks-	pksNeg9	1282430	C>T	0.077	intergenic (+448/+92)	narI / rttR			CTCGAG	CGAACC	ctcgagCcgaacc	sbs
pks-	pksNeg9	1282439	A>G	0.056	intergenic (+457/+83)	narI / rttR			AACCTT	GTCGAA	aaccttAgtcgaa	sbs
pks-	pksNeg9	3632645	T>C	0.059	intergenic (+144/+100)	pitA / uspB			TAGGCC	GATAAG	taggccTgataag	sbs
pks-	pksNeg9	4143544	C>T	0.071	intergenic (‑518/+80)	ppc / argE			CGCAAG	ATCGCA	cgcaagCatcgca	sbs
pks-	pksNeg10	142422	C>T	0.155	S285S (AGC→AGT)	yadE	yadE	synonymous	TATGAG	GTTTCT	tatgagCgtttct	sbs
pks-	pksNeg10	1282421	A>G	0.065	intergenic (+439/+101)	narI / rttR			TCGCTG	CGCTCG	tcgctgAcgctcg	sbs
pks-	pksNeg10	1282430	C>T	0.072	intergenic (+448/+92)	narI / rttR			CTCGAG	CGAACC	ctcgagCcgaacc	sbs
pks-	pksNeg10	3795003	C>A	0.282	L119F (TTG→TTT)	waaJ	waaJ	nonsynonymous	TAAACC	AATAAT	taaaccCaataat	sbs
pks-	pksNeg11	307773	IS5 (–) +4 bp	0.275	intergenic (‑726/‑47)	ecpR / ykgL						small_insertion
pks-	pksNeg11	1460467	G>A	0.05	pseudogene (819/2513 nt)	ydbA	ydbA		CAGCGC	ACGGTG	cagcgcGacggtg	sbs
pks-	pksNeg11	1702966	T>C	0.058	R597R (CGT→CGC)	rsxC	rsxC	synonymous	TGCCCG	GCCAAA	tgcccgTgccaaa	sbs
pks-	pksNeg11	2470733	T>G	0.065	T126P (ACA→CCA)	dsdC	dsdC	nonsynonymous	GGCGTG	AAAGTC	ggcgtgTaaagtc	sbs
pks-	pksNeg11	3263314	G>A	0.15	intergenic (+353/+261)	yhaC / rnpB			CCAAAA	TAAAAA	ccaaaaGtaaaaa	sbs
pks-	pksNeg11	4029211	A>G	0.282	noncoding (321/1542 nt)	rrsA	rrsA		ACTGGA	CTGAGA	actggaActgaga	sbs
pks-	pksNeg12	1142145	A>T	0.161	noncoding (101/169 nt)	psrD	psrD		GAACGA	AATAAA	gaacgaAaataaa	sbs
pks-	pksNeg12	1191676	C>T	0.117	H366H (CAC→CAT)	icd	icd	synonymous	GCGCCA	ATGGGT	gcgccaCatgggt	sbs
pks-	pksNeg12	1191688	C>T	0.076	T370T (ACC→ACT)	icd	icd	synonymous	TTGGAC	GAAGCG	ttggacCgaagcg	sbs
pks-	pksNeg12	1191701	T>C	0.065	L375L (TTA→CTA) ‡	icd	icd	synonymous	GCTGAC	TAATTG	gctgacTtaattg	sbs
pks-	pksNeg12	1191703	A>G	0.067	L375L (TTA→TTG) ‡	icd	icd	synonymous	TGACTT	ATTGTT	tgacttAattgtt	sbs
pks-	pksNeg12	1282287	T>G	0.093	intergenic (+305/+235)	narI / rttR			CCCCGC	TGGGCA	ccccgcTtgggca	sbs
pks-	pksNeg12	1460861	G>A	0.059	pseudogene (1213/2513 nt)	ydbA	ydbA		GAGAGC	CCATCA	gagagcGccatca	sbs
pks-	pksNeg12	1542196	T>C	0.125	F180S (TTT→TCT)	fdnG	fdnG	nonsynonymous	AGAAAT	TGCCCG	agaaatTtgcccg	sbs
pks-	pksNeg12	1609330	A>C	0.113	L90F (TTA→TTC)	yneJ	yneJ	nonsynonymous	AGGTTT	TTTTCT	aggtttAttttct	sbs
pks-	pksNeg12	1644507	T>A	0.121	pseudogene (173/765 nt)	ydfE	ydfE		ATAAAT	TATTGT	ataaatTtattgt	sbs
pks-	pksNeg12	2165296	T>C	0.071	intergenic (‑88/+18)	gatR / gatD			CCAGCA	CACGCT	ccagcaTcacgct	sbs
pks-	pksNeg12	2749228	G>T	0.06	intergenic (+491/‑290)	smpB / intA			GCAGCT	GCAAGC	gcagctGgcaagc	sbs
pks-	pksNeg12	2811683	G>A	0.056	intergenic (‑50/+149)	argY / argV			AAAGCC	TATCAA	aaagccGtatcaa	sbs
pks-	pksNeg12	3311270	G>A	0.231	R32R (CGC→CGT)	rimP	rimP	synonymous	GGATGT	CGACCG	ggatgtGcgaccg	sbs
pks-	pksNeg12	4143544	C>T	0.072	intergenic (‑518/+80)	ppc / argE			CGCAAG	ATCGCA	cgcaagCatcgca	sbs
pks-	pksNeg12	4143586	C>T	0.075	intergenic (‑560/+38)	ppc / argE			CAACAG	GCCGGA	caacagCgccgga	sbs
pks-	pksNeg12	4315905	T>G	0.058	intergenic (‑347/+311)	yjdN / yjdM			TACGGA	GGTGCG	tacggaTggtgcg	sbs
