# Supplementary material for: Colibactin leads to a bacteria-specific mutation pattern and self-inflicted DNA damage
Source: PubMed Central journal article supplement (PMC11444178; doi:10.1101/gr.279517.124), 2024-08
Supplement: supplemental_methods.pdf [file supplemental_methods.pdf]

Genomic deletion primers:

|                  |                                                                                      |
|------------------|--------------------------------------------------------------------------------------|
| gspl_del_carb_fw | tgccagaactggacgtgttttctcgcgcaatgaatcttgactgaagcGGCTAATGCACCCAGT<br>AAGG              |
| gspl_del_carb_rv | tcaaacgctcgcagagatacccgcccatgaacaaacaatcagggatgacACTAGCAACACCAG<br>AACAGCC           |
| clbN_del_chl_fw  | ttgtattccttaagggttggcatcgtgtttatagtgtccGCGGTATCATCAACAGGCTT                          |
| clbN_del_chl_rv  | acaggaacagtgccacatcattgatcaactgtatccttacACGAAAGGGCCTCGTGATAC                         |
| clbS_del_chl_fw  | gtccacactcatcgtgcccgaaaaatcatcagtggggaggcaaacggtgaagcaccgAGCGGT<br>ATCATCAACAGGCTT   |
| clbS_del_chl_rv  | ttgaatcactcgaaatagtagggtagaaatagttgtgtaactatacaaggagcaatagatACGAAAG<br>GGCCTCGTGATAC |

Note: lowercase letters are homology arms for genomic regions flanking the gene of interest; uppercase arms are primers for antibiotic resistance cassettes in plasmids.

Fluorescent DNA damage reporter primer sequences:

|                   |                                                                             |
|-------------------|-----------------------------------------------------------------------------|
| backbone_EM7_fw   | GTTGACAATTAATCATCGGCATAGTATATCGGCATAGTATAATACGACGAATTCATTA<br>AAGAGGAGAAAGG |
| backbone_recA_rev | GTAGAAATTGTTGCCACAAGATGGTTTCTTAGACGTCCAT                                    |
| recA_backbone_fw  | ATGGACGTCTAAGAAACCATCTTGTGGCAACAATTTCTAC                                    |
| recA_YFP_rev      | TTCTCCTCTTTAATGAATTCGATAGTCAATATGTTCTGTT                                    |
| YFP_recA_fw       | AACAGAACATATTGACTATCGAATTCATTAAAGAGGAGAA                                    |
| YFP_EM7_rev       | GCCGATGATTAATTGTCAACTCTAGGGCGGGCGGATTTGTC                                   |

Backbone includes CFP and spectinomycin resistance
